# Supplementary material for: Safety and effectiveness of dose-sparing strategies for intramuscular seasonal influenza vaccine: a rapid scoping review
Source: PubMed Central journal article supplement — BMJ Open. 2021 Sep 17;11(9):e050596. doi: 10.1136/bmjopen-2021-050596 (PMC8450963; doi:10.1136/bmjopen-2021-050596), 2021-09-17
Supplement: bmjopen-2021-050596.draft_revisions.pdf [file bmjopen-2021-050596.draft_revisions.pdf]

# BMJ Open

BMJ Open is committed to open peer review. As part of this commitment we make the peer review history of every article we publish publicly available.

When an article is published we post the peer reviewers' comments and the authors' responses online. We also post the versions of the paper that were used during peer review. These are the versions that the peer review comments apply to.

The versions of the paper that follow are the versions that were submitted during the peer review process. They are not the versions of record or the final published versions. They should not be cited or distributed as the published version of this manuscript.

BMJ Open is an open access journal and the full, final, typeset and author-corrected version of record of the manuscript is available on our site with no access controls, subscription charges or pay-per-view fees (<http://bmjopen.bmj.com>).

If you have any questions on BMJ Open's open peer review process please email [info.bmjopen@bmj.com](mailto:info.bmjopen@bmj.com)

# BMJ Open

## Safety and effectiveness of dose-sparing strategies for intramuscular seasonal influenza vaccine: A rapid scoping review

|                               |                                                                                                                                                                                                                                                                                                                                                                                                                                                                                                                            |
|-------------------------------|----------------------------------------------------------------------------------------------------------------------------------------------------------------------------------------------------------------------------------------------------------------------------------------------------------------------------------------------------------------------------------------------------------------------------------------------------------------------------------------------------------------------------|
| Journal:                      | <i>BMJ Open</i>                                                                                                                                                                                                                                                                                                                                                                                                                                                                                                            |
| Manuscript ID                 | bmjopen-2021-050596                                                                                                                                                                                                                                                                                                                                                                                                                                                                                                        |
| Article Type:                 | Original research                                                                                                                                                                                                                                                                                                                                                                                                                                                                                                          |
| Date Submitted by the Author: | 25-Feb-2021                                                                                                                                                                                                                                                                                                                                                                                                                                                                                                                |
| Complete List of Authors:     | Lunny, Carole; UBC, DAPT<br>Antony, Jesmin; St Michael's Hospital Li Ka Shing Knowledge Institute<br>Rios, Patricia; Independent Researcher<br>Williams, Chantal ; Independent Researcher<br>Ramkissoon, Naveeta; St Michael's Hospital Li Ka Shing Knowledge Institute, Knowledge Translation<br>Straus, Sharon; St Michael's Hospital Li Ka Shing Knowledge Institute; University of Toronto, Geriatric Medicine<br>Tricco, Andrea; St Michael's Hospital Li Ka Shing Knowledge Institute, Knowledge Translation Program |
| Keywords:                     | VIROLOGY, IMMUNOLOGY, PUBLIC HEALTH                                                                                                                                                                                                                                                                                                                                                                                                                                                                                        |
|                               |                                                                                                                                                                                                                                                                                                                                                                                                                                                                                                                            |

SCHOLARONE™  
Manuscripts

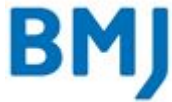

I, the Submitting Author has the right to grant and does grant on behalf of all authors of the Work (as defined in the below author licence), an exclusive licence and/or a non-exclusive licence for contributions from authors who are: i) UK Crown employees; ii) where BMJ has agreed a CC-BY licence shall apply, and/or iii) in accordance with the terms applicable for US Federal Government officers or employees acting as part of their official duties; on a worldwide, perpetual, irrevocable, royalty-free basis to BMJ Publishing Group Ltd ("BMJ") its licensees and where the relevant Journal is co-owned by BMJ to the co-owners of the Journal, to publish the Work in this journal and any other BMJ products and to exploit all rights, as set out in our [licence](#).

The Submitting Author accepts and understands that any supply made under these terms is made by BMJ to the Submitting Author unless you are acting as an employee on behalf of your employer or a postgraduate student of an affiliated institution which is paying any applicable article publishing charge ("APC") for Open Access articles. Where the Submitting Author wishes to make the Work available on an Open Access basis (and intends to pay the relevant APC), the terms of reuse of such Open Access shall be governed by a Creative Commons licence – details of these licences and which [Creative Commons](#) licence will apply to this Work are set out in our licence referred to above.

Other than as permitted in any relevant BMJ Author's Self Archiving Policies, I confirm this Work has not been accepted for publication elsewhere, is not being considered for publication elsewhere and does not duplicate material already published. I confirm all authors consent to publication of this Work and authorise the granting of this licence.

1 **Safety and effectiveness of dose-sparing strategies for intramuscular seasonal influenza**  
2  
3  
4  
5  
6 **vaccine:**

7  
8 **A rapid scoping review**

9  
10 4 Carole Lunny<sup>1,2\*†</sup> Email: carole.lunny@ubc.ca  
11  
12 5 Jesmin Antony<sup>2\*</sup> Email: jesmin.antony@unityhealth.to  
13  
14 6 Patricia Rios<sup>3</sup> Email: patricia.rios@wchospital.ca  
15  
16 7 Chantal Williams<sup>3</sup> Email: chantal.williams@uhn.ca  
17  
18 8 Naveeta Ramkissoon<sup>2</sup> Email: naveeta.ramkissoon@unityhealth.to  
19  
20 9 Sharon E. Straus<sup>2,4,5</sup> Email: sharon.straus@unityhealth.to  
21  
22 10 Andrea C. Tricco<sup>2,6</sup> Email: andrea.tricco@unityhealth.to  
23

24  
25  
26 11 <sup>1</sup>Cochrane Hypertension Review Group and the Therapeutics Initiative, University of British  
27  
28 Columbia, Vancouver, BC

29  
30 13 <sup>2</sup>Li Ka Shing Knowledge Institute, St. Michael's Hospital, Unity Health Toronto, Toronto,  
31  
32 Ontario, Canada

33  
34 15 <sup>3</sup>Independent Researcher

35  
36 16 <sup>4</sup>Department of Medicine, University of Toronto, Toronto, Ontario, Canada

37  
38 17 <sup>5</sup>Department of Geriatric Medicine, University of Toronto, Toronto, Ontario, Canada

39  
40 18 <sup>6</sup>Epidemiology Division, Dalla Lana School of Public Health and Institute for Health,  
41  
42 Management, and Evaluation, University of Toronto, Toronto, Ontario, Canada  
43  
44

45  
46 20 \*These authors contributed equally.

47  
48 21 †Corresponding Author

49  
50 22 Carole Lunny

51  
52 23 MPH, PhD  
53  
54  
55  
56  
57  
58  
59  
60

1  
2  
3  
4  
5  
6  
7  
8  
9  
10  
11  
12  
13  
14  
15  
16  
17  
18  
19  
20  
21  
22  
23  
24  
25  
26  
27  
28  
29  
30  
31  
32  
33  
34  
35  
36  
37  
38  
39  
40  
41  
42  
43  
44  
45  
46  
47  
48  
49  
50  
51  
52  
53  
54  
55  
56  
57  
58  
59  
60

24 Postdoctoral Fellow, Methodology and Research Synthesis  
25 Cochrane Hypertension Group and the Therapeutics Initiative  
26 University of British Columbia  
27 x<sup>w</sup>məθk<sup>w</sup>əyəm (Musqueam) Territory  
28 Vancouver, BC Canada  
29 carole.lunny@ubc.ca  
30 @carole\_lunny  
31 Affiliations:  
32 SPOR Evidence Alliance, Unity Health, University of Toronto  
33 University of Bristol  
34 Word count: 3559

For peer review only

## 35 ABSTRACT

36 **Background:** The objective of this rapid scoping review was to identify dose-sparing strategies  
37 for intramuscular administration of seasonal influenza vaccines in healthy individuals of all ages.

38 **Methods:** Comprehensive literature searches were executed in MEDLINE, EMBASE, and the  
39 Cochrane library. The grey literature was searched via international clinical trial registries for  
40 relevant studies published in English in the last 20 years. References of the included systematic  
41 reviews and their primary studies were also scanned. Title/abstract and full-text screening were  
42 carried out by pairs of reviewers independently. Data extraction was conducted by a single  
43 reviewer and verified by a second reviewer. Our outcomes of interest were influenza infections,  
44 ICU admission, pneumonia, hospitalizations, adverse events, and mortality. Results were  
45 summarized descriptively.

46 **Results:** A total of 13 studies with 10,351 participants were included in the review and all  
47 studies were randomized control trials (RCTs) conducted between 2006 and 2019. The most  
48 common interventions were the trivalent influenza vaccine (n=10), followed by the quadrivalent  
49 influenza vaccine (n=4). Nine studies included infants/toddlers 6-36 months old and one of these  
50 studies also included children and adolescents. In these nine studies, no clinical effectiveness  
51 outcomes were reported. Of the four adult studies ( $\geq 18$  years), two studies reported on  
52 effectiveness outcomes.

53 **Conclusions:** Due to the low number of studies in healthy adults and the lack of studies  
54 assessing confirmed influenza and influenza-like illness, there remains a need for further  
55 evaluation.

56 **Keywords:**

## 57 STRENGTHS AND LIMITATIONS OF THIS STUDY

### 58 Strengths:

- 59 • This rapid scoping review was conducted within a 6-week timeline and the methods were  
60 tailored to provide results to the stakeholders within 4 weeks.
- 61 • We did not restrict the search dates and study screening was completed in independently  
62 by two reviewers.

### 63 Limitations:

- 64 • We limited the selection of studies to those published in the English language, and data  
65 extraction was conducted by one abstractor and one verifier.
- 66 • Twelve dose-sparing RCTs were not included in the review because they did not include  
67 vaccines that were deemed of interest to the stakeholder, and/or did not provide sufficient  
68 data.

## 69 BACKGROUND

70 The symptoms of novel coronavirus disease (COVID-19) closely mimic those of seasonal  
71 influenza vaccine and health officials recommend vaccination against the flu to limit  
72 confounding of flu symptoms with COVID-19 symptoms. An anticipated shortage in influenza  
73 vaccine supplies was of concern.[1] This anticipated shortage did not happen however, and in the  
74 2019-2020 flu season, influenza vaccination coverage among adults (42%) was similar to the  
75 previous season (42%). This question of vaccine shortage remains relevant in Canada and other  
76 jurisdictions for future COVID-19 and flue seasons. As a potential solution, health officials were  
77 interested in assessing the effectiveness of fractional dosing (e.g., half-doses) of currently  
78 available intramuscular influenza vaccines.

79 Fractional dosing, or dose sparing, strategies are those where less than the standard dose of  
80 hemagglutinin (HA) antigen, and thus less volume of vaccine, is administered, increasing the  
81 overall number of influenza vaccine doses available. In Canada, influenza vaccines are currently  
82 authorized for intramuscular administration only, apart from the live-attenuated influenza  
83 vaccine, which is administered intranasally.[2] Standard dose influenza vaccines contain 15 mcg  
84 of HA per strain and are delivered in 0.5 mL volume. Therefore, the total amount of HA in  
85 standard dose trivalent vaccines is 45 mcg, and the total amount of HA in standard dose  
86 quadrivalent vaccines is 60 mcg.

87 A scoping review of all the available dose sparing strategies for intramuscular administration of  
88 seasonal influenza vaccines currently approved in Canada for healthy populations had not been  
89 systematically conducted. With the resource-constraints for the influenza season due to COVID-  
90 19, there is a need to scope the evidence on the safety and effectiveness of dose-sparing  
91 strategies for intramuscular administration of seasonal influenza vaccines. The objective of this



1  
2  
3 92 rapid scoping review was to identify studies of dose-sparing strategies for administration of  
4  
5 93 intramuscular seasonal influenza vaccines in healthy individuals of all ages. The results of this  
6  
7  
8 94 scoping review were used to inform a systematic review with meta-analysis by National  
9  
10 95 Advisory Committee on Immunization (NACI) on the same topic [3].

## 11 12 96 **METHODS**

13  
14  
15 97 The Centre for Immunization and Respiratory Infectious Diseases of the Public Health Agency  
16  
17 98 of Canada (PHAC) commissioned a rapid scoping review on the available methods for fractional  
18  
19 99 dosing of seasonal influenza vaccines through the Canadian Institutes of Health Research  
20  
21  
22 100 (CIHR) Drug Safety and Effectiveness Network (DSEN) with a 6-week timeline for preliminary  
23  
24 101 results.

### 25 26 102 **Protocol**

27  
28  
29 103 The methods for this review were guided by the updated reviewer manual for scoping reviews  
30  
31 104 published by the Joanna Briggs Institute and the World Health Organization's guide to rapid  
32  
33 105 reviews.[4, 5] Results are reported according to the Preferred Reporting Items for Systematic  
34  
35 106 Reviews and Meta-analysis extension to scoping reviews (PRISMA-ScR).[6] A protocol for this  
36  
37 107 rapid review was disseminated through the Open Science Framework registry  
38  
39  
40 108 (<https://osf.io/8mwz2/>).

### 41 42 109 **Literature search**

43  
44  
45 110 Comprehensive literature searches were developed and executed by an experienced librarian in  
46  
47 111 Ovid MEDLINE (**Appendix 1**), EMBASE using the OVID interface (**Appendix 2**), and the  
48  
49 112 Cochrane library between 1946 and May 2020 (**Appendix 3**). The literature search was peer  
50  
51 113 reviewed by a second librarian using the PRESS checklist  
52  
53  
54 114 (<https://www.cadth.ca/resources/finding-evidence/press>). The grey (i.e., difficult to locate or

1  
2  
3 115 unpublished) literature was searched via international clinical trial registries (i.e.  
4  
5 116 clinicaltrials.gov, EU clinical trial register). References of relevant systematic reviews and  
6  
7 117 included studies were also scanned.  
8  
9

### 10 118 **Eligibility criteria**

11  
12 119 The eligibility criteria followed the Population, Intervention, Comparators, Outcome, Study  
13  
14 120 design (PICOS) framework as follows:

- 15  
16  
17 121 • Population: Healthy humans of any age. Immunocompromised populations and animal  
18  
19 122 studies were excluded. Examples of persons with weakened immune systems include those  
20  
21 123 with HIV/AIDS; cancer and transplant patients who are taking certain immunosuppressive  
22  
23 124 drugs; and those with inherited diseases that affect the immune system (e.g., congenital  
24  
25 125 agammaglobulinemia, congenital IgA deficiency)[7].
- 26  
27  
28 126 • Intervention: Any dose-sparing strategy used to administer intramuscular seasonal influenza  
29  
30 127 vaccines (eligible vaccines listed in **Appendix 4**). Eligible strategies included, but were not  
31  
32 128 limited to, administering less than the standard 15 ug HA antigen using multi-dose vials, half  
33  
34 129 dosing, or pre-formulated products with reduced antigen quantity, or with revised vaccine  
35  
36 130 dose schedules. Any studies examining monovalent pandemic vaccines,  
37  
38 131 specialty/experimental vaccines (e.g., high dose), whole virus vaccines, or other routes of  
39  
40 132 administration (e.g. intranasal, intradermal) were not eligible. Only vaccine products  
41  
42 133 approved for use in Canada or equivalent formulations approved for use in other countries  
43  
44 134 were eligible for inclusion. Concomitant administration with other vaccine products were  
45  
46 135 included only if administered to both the intervention and the comparator groups.  
47  
48  
49  
50  
51 136 • Comparator: Any of the interventions listed above, no intervention, or placebo.  
52  
53  
54  
55  
56  
57  
58  
59  
60

- 1  
2  
3 137 • Outcomes: Lab-confirmed influenza infection (primary outcome), influenza-like illness or  
4  
5 138 clinical/symptomatic diagnosis of influenza, hospitalization, intensive care unit (ICU)  
6  
7 139 admission, pneumonia, mortality, and adverse events (local/systemic reactogenicity,  
8  
9 140 vascular-related, serious). Reactogenicity represents the physical manifestation of the  
10  
11 141 inflammatory response to vaccination, and can include injection-site pain, redness, swelling  
12  
13 142 or induration at the injection site, as well as systemic symptoms, such as fever, myalgia, or  
14  
15 143 headache.[8]  
16  
17  
18  
19 144 • Study designs: Randomized controlled trials (RCTs), non-randomised studies (e.g., quasi-  
20  
21 145 RCTs, non-randomized trials, interrupted time series, controlled before after), and  
22  
23 146 observational studies (e.g., cohort, case control) were included. Studies must have had a  
24  
25 147 control or comparator group in order to be eligible for inclusion and as such, cross-sectional,  
26  
27 148 case series, case reports, and qualitative studies were excluded.  
28  
29  
30  
31 149 • Publication status: We included full text and abstracts if they included data on safety or  
32  
33 150 effectiveness.

34  
35  
36 151 Inclusion was also limited to studies written in the English language due to the short timelines  
37  
38 152 for the conduct of this review.

### 39 40 153 **Study selection**

41  
42 154 A screening form based on the eligibility criteria was prepared and pilot-tested with 30 studies  
43  
44 155 with all members of the review team until sufficient agreement (>75%) was reached prior to both  
45  
46 156 title/abstract (level 1) and full-text (level 2) screening. Subsequent screening at level 1 and level  
47  
48 157 2 were completed by pairs of reviewers working independently using the Knowledge Translation  
49  
50 158 Program's proprietary screening software (synthesi.SR)[9]. Any discrepancies between  
51  
52 159 reviewers were consistently resolved by a third independent reviewer.  
53  
54  
55  
56  
57  
58  
59  
60

## 160 **Data extraction**

161 Items for data collection included study characteristics (study design, year of publication,  
162 country of conduct, multi-center vs. single site), patient characteristics (mean age, age range, sex,  
163 vaccination history), intervention details (type of vaccine, vaccine manufacturer, dose, timing  
164 and administration of treatment), comparator details (comparator intervention, dose), and  
165 outcome results (influenza infections, ICU admission, pneumonia, hospitalizations, adverse  
166 events, mortality) at the longest duration of follow-up.

167 A standardized form for data extraction was developed and pilot tested by the entire review team  
168 using two pre-selected full-text RCTs to ensure understanding of the data items to be extracted,  
169 and congruence among reviewers. All included studies were extracted by one reviewer  
170 independently and then verified by a second reviewer.

## 171 **Risk of bias assessment**

172 As this was a scoping review, the risk of bias of studies was not assessed.[4]

## 173 **Synthesis**

174 The synthesis involved providing a descriptive summary of included studies with summary  
175 tables and detailed tables of study results. Study results were organized and tabulated according  
176 to patients (children vs adults), interventions, and outcomes and where available information on  
177 relevant subgroups.

## 178 **RESULTS**

### 179 **Literature search**

180 We screened 2,378 titles and abstracts from our database search and an additional 13 citations  
181 located through searching the grey literature and scanning references. Of these, 144 potentially  
182 relevant full-text articles were screened for eligibility (**Figure 1**). Twelve studies that assessed

183 dose-sparing strategies were excluded during full-text screening because the vaccine under study  
 184 was not of interest or unclearly reported. We contacted authors of these 12 unclear studies and  
 185 received 1 response confirming the vaccine was not of interest (see list of excluded studies in  
 186 **Appendix 5**). Subsequently, 13 RCTs were included; five trial protocols were found and were  
 187 denoted as duplicate/companion reports. No non-randomised or observational studies were found  
 188 that fulfilled the eligibility criteria.

### 189 **Study characteristics**

190 **Table 1** summarizes the characteristics of the 13 RCTs published between 2006 and 2019; and  
 191 conducted mainly in the US, followed by Mexico, Canada and Finland. The majority of the  
 192 studies evaluated trivalent vaccines (10/13 [77%]) and most were conducted in the 6-36 month-  
 193 old pediatric population (9/13 [69%]). Almost all studies reported on reactogenicity and/or other  
 194 adverse events, but only two studies reported on the effectiveness of our outcomes of interest  
 195 (i.e., lab-confirmed influenza and influenza-like illness).

196 Full study and patient characteristic details for each study are reported in **Appendix 6** and  
 197 treatment and outcome details in **Appendix 7**.

198 **Table 1: Characteristics of included studies (n=13)**

| Characteristics                   | Category      | Frequency (%) |
|-----------------------------------|---------------|---------------|
| Date of publication               | 2006-2010     | 4 (30.8)      |
|                                   | 2011-2015     | 5 (38.4)      |
|                                   | 2016-2020     | 4 (30.8)      |
| Multi-center or single site       | Multi-centre  | 8 (61.5)      |
|                                   | Single centre | 2 (15.4)      |
| Countries of conduct <sup>a</sup> | USA           | 8 (61.5)      |
|                                   | Mexico        | 3 (23.1)      |
|                                   | Canada        | 2 (15.4)      |
|                                   | Finland       | 2 (15.4)      |
|                                   | Belgium       | 1 (7.7)       |
|                                   | Hong Kong     | 1 (7.7)       |
|                                   | Taiwan        | 1 (7.7)       |

|                            |                                      |           |
|----------------------------|--------------------------------------|-----------|
|                            | Thailand                             | 1 (7.7)   |
| Populations <sup>a,b</sup> | Infants/Toddlers (6-36 months)       | 9 (69.2)  |
|                            | Children (37 months – 17 years)      | 1 (7.7)   |
|                            | Adults (18-64 years)                 | 3 (23.1)  |
|                            | Older adults ( $\geq 65$ )           | 1 (7.7)   |
| Treatments <sup>a,c</sup>  | Trivalent influenza vaccine (TIV)    | 10 (76.9) |
|                            | Quadrivalent influenza vaccine (QIV) | 4 (30.8)  |
| Outcomes <sup>a</sup>      | Effectiveness                        | 2 (15.4)  |
|                            | Local and Systemic Reactogenicity    | 12 (92.3) |
|                            | Adverse events                       | 10 (76.9) |

<sup>a</sup>Each study can fit into more than one category so the total percentage will not add up to 100%

<sup>b</sup>One study includes both infants/toddlers and children, and another includes both adults and seniors

<sup>c</sup>One study includes both TIV and QIV arms

## 199 RCTs in healthy children (<18 years old)

200  
201  
202  
203  
204  
205  
206  
207  
208  
209  
210  
211  
212  
213  
214  
215  
216  
217  
218  
219  
220  
221  
222  
223  
224  
225  
226  
227  
228  
229  
230  
231  
232  
233  
234  
235  
236  
237  
238  
239  
240  
241  
242  
243  
244  
245  
246  
247  
248  
249  
250  
251  
252  
253  
254  
255  
256  
257  
258  
259  
260

Nine studies included infants/toddlers 6-36 months old and one study also included children and adolescents (**Table 2**). None of these studies reported results on the effectiveness outcomes that were relevant to our review and established *a priori*, however all of them reported on safety outcomes.

207 **Table 2: Nine RCTs conducted in children (6 months – 17 years)**

| Author, Year                                                   | Study period and countr(ies) | Treatment arms<br>Brand name<br>(manufacturer)<br>HA/strain<br>[dosing] | Mean age<br>(SD)  | Age range     | Sex<br>(overall %<br>female) | Vaccination history<br>(overall %<br>previously immunized) | ITT sample size | Outcomes                          | Author reported conclusions                                                                                                                                                                                                                                          |
|----------------------------------------------------------------|------------------------------|-------------------------------------------------------------------------|-------------------|---------------|------------------------------|------------------------------------------------------------|-----------------|-----------------------------------|----------------------------------------------------------------------------------------------------------------------------------------------------------------------------------------------------------------------------------------------------------------------|
| <b>TRIVALENT AND QUADRIVALENT INFLUENZA VACCINES (TIV/QIV)</b> |                              |                                                                         |                   |               |                              |                                                            |                 |                                   |                                                                                                                                                                                                                                                                      |
| Cioppa, 2011[10]                                               | October 2008 – March 2009    | NR - TIV, <b>7.5-µg/strain</b> [2 x 0.25mL dose]                        | 20.0 months (7.0) | 6- <36 months | 43.5                         | NR                                                         | 25              | Local and Systemic reactogenicity | Reactogenicity of the 7.5-µg TIV/QIV formulations was slightly lower than for the corresponding 15-µg formulations.<br><br>The majority of unsolicited AEs were mild or moderate in severity and none of the SAEs was considered to be related to the study vaccine. |
|                                                                | Belgium                      | Agrippal - TIV, <b>15-µg/strain</b> [2 x 0.5mL dose]                    | 15.0 months (8.8) | 6- <36 months | 43.5                         | NR                                                         | 22              | Adverse events                    |                                                                                                                                                                                                                                                                      |
|                                                                |                              | NR - QIV, <b>7.5-µg/strain</b> [2 x 0.25mL dose]                        | 18.0 months (8.9) | 6- <36 months | 43.5                         | NR                                                         | 25              |                                   |                                                                                                                                                                                                                                                                      |
|                                                                |                              | NR - QIV, <b>15-µg/strain</b> [2 x 0.5mL dose]                          | 15.2 months (7.8) | 6- <36 months | 43.5                         | NR                                                         | 28              |                                   |                                                                                                                                                                                                                                                                      |
|                                                                |                              | Vaxigrip (Sanofi Pasteur), <b>7.5-µg/strain</b> [2 x 0.25mL dose]       | 16.1 months (8.5) | 6- <36 months | 43.5                         | NR                                                         | 26              |                                   |                                                                                                                                                                                                                                                                      |

| Author, Year         | Study period and countr(ies)                 | Treatment arms<br>Brand name<br>(manufacturer)<br>HA/strain<br>[dosing] | Mean age<br>(SD)  | Age range   | Sex<br>(overall %<br>female) | Vaccination history<br>(overall %<br>previously immunized) | ITT sample size | Outcomes                                                | Author reported conclusions                                                                                                                                                                                                                                                                                                                                                       |
|----------------------|----------------------------------------------|-------------------------------------------------------------------------|-------------------|-------------|------------------------------|------------------------------------------------------------|-----------------|---------------------------------------------------------|-----------------------------------------------------------------------------------------------------------------------------------------------------------------------------------------------------------------------------------------------------------------------------------------------------------------------------------------------------------------------------------|
| Skowronski, 2011[11] | September 2008 – December 2008<br><br>Canada | Vaxigrip (Sanofi-Pasteur),<br>15-µg/strain [2 x 0.5mL dose]             | 13.2 months (5.1) | 6-23 months | 53.2                         | 0                                                          | 124             | Local and Systemic reactogenicity<br><br>Adverse events | Local reactions generally were less common in infants than toddlers and more common with full doses versus half doses, but none of these differences were significant.<br><br>One serious adverse event was reported: a toddler in the half dose group was hospitalized with pneumonia 28 days after the first vaccination. The event was deemed unlikely related to the vaccine. |
|                      |                                              | Vaxigrip (Sanofi-Pasteur),<br>15-µg/strain [2 x 0.25mL dose]            | 12.8 months (5.0) | 6-23 months | 53.2                         | 0                                                          | 128             |                                                         |                                                                                                                                                                                                                                                                                                                                                                                   |



1  
2  
3  
4  
5  
6  
7  
8  
9  
10  
11  
12  
13  
14  
15  
16  
17  
18  
19  
20  
21  
22  
23  
24  
25  
26  
27  
28  
29  
30  
31  
32  
33  
34  
35  
36  
37  
38  
39  
40  
41  
42  
43  
44  
45  
46  
47

| Author, Year      | Study period and countr(ies) | Treatment arms<br>Brand name (manufacturer)<br>HA/strain [dosing]     | Mean age (SD)      | Age range   | Sex (overall % female) | Vaccination history (overall % previously immunized) | ITT sample size | Outcomes                          | Author reported conclusions                                                                                                                                                                                                                 |
|-------------------|------------------------------|-----------------------------------------------------------------------|--------------------|-------------|------------------------|------------------------------------------------------|-----------------|-----------------------------------|---------------------------------------------------------------------------------------------------------------------------------------------------------------------------------------------------------------------------------------------|
|                   |                              |                                                                       |                    |             |                        |                                                      |                 |                                   | Compared with 0.25-mL half-dosing, administration of 2 full 0.5-mL doses of trivalent inactivated influenza vaccine can increase antibody response without increasing reactogenicity in previously unimmunized infants aged 6 to 11 months. |
| Langley, 2012[12] | November 2008 – August 2009  | Fluviral F1 (Sanofi-Pasteur), <b>7.5-µg/strain</b> [1 x 0.25 mL dose] | 18.2 months (9.06) | 6-35 months | 47.9                   | 42.6                                                 | 164             | Local and Systemic reactogenicity | Fluviral F1 group had 1 case of pneumonia resolved. Fluviral F2 group had 1 case of                                                                                                                                                         |
|                   | Canada                       | Fluviral F2 (Sanofi-Pasteur), <b>15-µg/strain</b> [1 x 0.5mL dose]    | 17.5 months (8.27) | 6-35 months | 47.9                   | 42.6                                                 | 167             | Adverse events                    |                                                                                                                                                                                                                                             |

For peer review only

| Author, Year        | Study period and countr(ies) | Treatment arms<br>Brand name<br>(manufacturer)<br>HA/strain<br>[dosing] | Mean age<br>(SD)   | Age range   | Sex<br>(overall %<br>female) | Vaccination history<br>(overall %<br>previously immunized) | ITT sample size | Outcomes                          | Author reported conclusions                                                                                                                                                                                                                                                                                        |
|---------------------|------------------------------|-------------------------------------------------------------------------|--------------------|-------------|------------------------------|------------------------------------------------------------|-----------------|-----------------------------------|--------------------------------------------------------------------------------------------------------------------------------------------------------------------------------------------------------------------------------------------------------------------------------------------------------------------|
|                     |                              | Vaxigrip (Sanofi-Pasteur),<br><b>7.5-µg/strain</b> [1 x 0.25 mL dose]   | 17.0 months (8.33) | 6-35 months | 47.9                         | 42.6                                                       | 43              |                                   | bronchial hyper-reactivity in resolving stage.<br><br>The 0.5-mL dose of the study vaccine, when administered to children aged 6–35 months, resulted in a modest but not statistically significant improvement in immunogenicity with clinically similar safety and reactogenicity compared with the 0.25-mL dose. |
| Pavia-Ruz, 2013[13] | October 2008-March 2009      | Fluarix (GSK),<br><b>15-µg/strain</b> [1 x 0.5mL dose]                  | 21.2 months (8.37) | 6-35 months | 51                           | 30.1                                                       | 1018            | Local and Systemic reactogenicity | The reactogenicity and safety                                                                                                                                                                                                                                                                                      |

1  
2  
3  
4  
5  
6  
7  
8  
9  
10  
11  
12  
13  
14  
15  
16  
17  
18  
19  
20  
21  
22  
23  
24  
25  
26  
27  
28  
29  
30  
31  
32  
33  
34  
35  
36  
37  
38  
39  
40  
41  
42  
43  
44  
45  
46  
47

| Author, Year | Study period and countr(ies)                     | Treatment arms<br>Brand name (manufacturer)<br>HA/strain [dosing] | Mean age (SD)      | Age range   | Sex (overall % female) | Vaccination history (overall % previously immunized) | ITT sample size | Outcomes       | Author reported conclusions                                                                                                                                                                                                                                                                                                                     |
|--------------|--------------------------------------------------|-------------------------------------------------------------------|--------------------|-------------|------------------------|------------------------------------------------------|-----------------|----------------|-------------------------------------------------------------------------------------------------------------------------------------------------------------------------------------------------------------------------------------------------------------------------------------------------------------------------------------------------|
|              | Hong Kong, Mexico, Taiwan, Thailand, and the USA | Fluarix (GSK),<br>7.5-µg/strain [1 x 0.25 mL dose]                | 21.2 months (8.03) | 6-35 months | 51                     | 30.1                                                 | 1018            | Adverse events | <p>profile of the study vaccine did not appear to be affected by doubling the dose.</p> <p>One participant in the Flu-15µg group had two SAEs, (apnea and cyanosis) which were considered by the investigator to be possibly related to vaccination. The subject was hospitalized and the events resolved on the same day as they occurred.</p> |
|              |                                                  | Fluzone (Sanofi-Pasteur),<br>7.5-µg/strain [1 x 0.25 mL dose]     | 21.1 months (8.20) | 6-35 months | 51                     | 30.1                                                 | 1031            |                |                                                                                                                                                                                                                                                                                                                                                 |

| Author, Year     | Study period and countr(ies) | Treatment arms<br>Brand name<br>(manufacturer)<br>HA/strain<br>[dosing] | Mean age<br>(SD) | Age range                    | Sex<br>(overall %<br>female) | Vaccination history<br>(overall %<br>previously immunized) | ITT sample size | Outcomes                          | Author reported conclusions                                                                                                                                                                                                                                                                                                                                                                  |
|------------------|------------------------------|-------------------------------------------------------------------------|------------------|------------------------------|------------------------------|------------------------------------------------------------|-----------------|-----------------------------------|----------------------------------------------------------------------------------------------------------------------------------------------------------------------------------------------------------------------------------------------------------------------------------------------------------------------------------------------------------------------------------------------|
| Halasa, 2015[14] | 2010-2012<br><br>USA         | Fluzone (Sanofi Pasteur),<br><b>7.5-µg/strain</b> [1 x 0.25 mL dose]    | 13.5             | 6-35 months,<br>12-35 months | 52                           | 13.2                                                       | 80              | Local and Systemic reactogenicity | No significant differences between the full-dose or half-dose groups for either the fully primed or naive cohorts for systemic reactions or local reactions when both seasons were combined.<br><br>The only significant difference in the 2011–2012 season was that 8 of 48 (16.7%) participants in the half-dose group compared with 32 of 96 (33.3%) in the full-dose group had increased |
|                  |                              | Fluzone (Sanofi Pasteur),<br><b>15-µg/strain</b> [1 x 0.5 mL dose]      | 14.5             |                              |                              |                                                            | 163             |                                   |                                                                                                                                                                                                                                                                                                                                                                                              |

1  
2  
3  
4  
5  
6  
7  
8  
9  
10  
11  
12  
13  
14  
15  
16  
17  
18  
19  
20  
21  
22  
23  
24  
25  
26  
27  
28  
29  
30  
31  
32  
33  
34  
35  
36  
37  
38  
39  
40  
41  
42  
43  
44  
45  
46  
47

| Author, Year    | Study period and countr(ies)    | Treatment arms<br>Brand name (manufacturer)<br>HA/strain [dosing] | Mean age (SD)      | Age range   | Sex (overall % female) | Vaccination history (overall % previously immunized) | ITT sample size | Outcomes                          | Author reported conclusions                                                                                                                                                                                                                                                    |
|-----------------|---------------------------------|-------------------------------------------------------------------|--------------------|-------------|------------------------|------------------------------------------------------|-----------------|-----------------------------------|--------------------------------------------------------------------------------------------------------------------------------------------------------------------------------------------------------------------------------------------------------------------------------|
|                 |                                 |                                                                   |                    |             |                        |                                                      |                 |                                   | redness at the injection site (P < .05).<br><br>No significant differences between the groups in AE, SAE, or onset of chronic medical conditions between the dose groups in either the naive or fully primed cohorts, and none of the SAEs were deemed related to the vaccine. |
| Phung, 2016[15] | September 2010-<br>January 2011 | FLUAD (NR),<br>NR [1 x 0.5mL dose]                                | 68.7 months (18)   | 6-35 months | 55.8                   | 85.7                                                 | 60              | Local and Systemic reactogenicity | <i>Trial protocol with no author conclusions.</i>                                                                                                                                                                                                                              |
|                 | Finland                         | FLUAD (NR),<br>NR [1 x 0.25 mL dose]                              | 60.4 months (23.2) | 6-35 months | 55.8                   | 85.7                                                 | 75              | Adverse events                    |                                                                                                                                                                                                                                                                                |

For peer review only

| Author, Year   | Study period and countr(ies)     | Treatment arms<br>Brand name<br>(manufacturer)<br>HA/strain<br>[dosing] | Mean age<br>(SD)        | Age range      | Sex<br>(overall %<br>female) | Vaccination history<br>(overall %<br>previously immunized) | ITT sample size | Outcomes                                | Author reported conclusions                                                                                                                                         |
|----------------|----------------------------------|-------------------------------------------------------------------------|-------------------------|----------------|------------------------------|------------------------------------------------------------|-----------------|-----------------------------------------|---------------------------------------------------------------------------------------------------------------------------------------------------------------------|
|                |                                  | Agrippal S1<br>(NR),<br>NR [1 x 0.5mL<br>dose]                          | 68<br>months<br>(17.1)  | 6-35<br>months | 55.8                         | 85.7                                                       | 51              |                                         |                                                                                                                                                                     |
|                |                                  | Agrippal S1<br>(NR),<br>NR [1 x 0.25mL<br>dose]                         | 32.4<br>months<br>(1.9) | 6-35<br>months | 55.8                         | 85.7                                                       | 11              |                                         |                                                                                                                                                                     |
| Jain, 2017[16] | 2014-2015<br>Influenza<br>Season | Flulaval (GSK),<br>15-µg/strain [1 x<br>0.5mL dose]                     | 19.7<br>months<br>(8.7) | 6-35<br>months | 46.9                         | 57.5                                                       | 1013            | Local and<br>Systemic<br>reactogenicity | None of the<br>febrile seizures<br>or the SAEs<br>were considered<br>by the<br>investigator to<br>be related to<br>vaccination.                                     |
|                | USA and<br>New Mexico            | Fluzone (Sanofi<br>Pasteur),<br>7.5-µg/strain [1 x<br>0.25 mL dose]     | 19.9<br>months<br>(8.9) | 6-35<br>months | 46.9                         | 57.5                                                       | 1028            | Adverse<br>events                       | Double-dose<br>vaccines may<br>improve<br>protection<br>against<br>influenza B in<br>some young<br>children and<br>simplifies<br>annual influenza<br>vaccination by |

1  
2  
3  
4  
5  
6  
7  
8  
9  
10  
11  
12  
13  
14  
15  
16  
17  
18  
19  
20  
21  
22  
23  
24  
25  
26  
27  
28  
29  
30  
31  
32  
33  
34  
35  
36  
37  
38  
39  
40  
41  
42  
43  
44  
45  
46  
47

| Author, Year    | Study period and countr(ies)                 | Treatment arms<br>Brand name<br>(manufacturer)<br>HA/strain<br>[dosing]           | Mean age<br>(SD)            | Age range           | Sex<br>(overall %<br>female) | Vaccination history<br>(overall %<br>previously immunized) | ITT sample size | Outcomes                                                | Author reported conclusions                                                                                                                                                                                                                                                         |
|-----------------|----------------------------------------------|-----------------------------------------------------------------------------------|-----------------------------|---------------------|------------------------------|------------------------------------------------------------|-----------------|---------------------------------------------------------|-------------------------------------------------------------------------------------------------------------------------------------------------------------------------------------------------------------------------------------------------------------------------------------|
|                 |                                              |                                                                                   |                             |                     |                              |                                                            |                 |                                                         | allowing the same vaccine dose to be used for all eligible children and adults.                                                                                                                                                                                                     |
| Ojeda, 2019[17] | December 2017-<br>January 2018<br><br>Mexico | Vaxigrip Tetra<br>(Sanofi Pasteur)<br><b>PFS 15-µg/strain</b><br>[1 x 0.5mL dose] | NR<br>(6 months – 17 years) | 6 months – 17 years | 46.4                         | NR                                                         | 149             | Local and Systemic reactogenicity<br><br>Adverse events | Solicited systemic reactions were reported in more infants aged 6 – 35 months in the MDV group than in the PFS group however this was not clinically significant.<br><br>AE not considered related to a study vaccine.<br><br>There were no differences in reactogenicity or safety |
|                 |                                              | Vaxigrip Tetra<br>(Sanofi Pasteur)<br><b>MDV 15-µg/strain</b> [1 x 0.5mL dose]    | NR<br>(6 months – 17 years) | 6 months – 17 years | 46.4                         | NR                                                         | 153             |                                                         |                                                                                                                                                                                                                                                                                     |

| Author, Year        | Study period and countr(ies) | Treatment arms<br>Brand name<br>(manufacturer)<br>HA/strain<br>[dosing] | Mean age<br>(SD)      | Age range   | Sex<br>(overall %<br>female) | Vaccination history<br>(overall %<br>previously immunized) | ITT sample size | Outcomes                          | Author reported conclusions                                                                                                                                                                                                                                                          |
|---------------------|------------------------------|-------------------------------------------------------------------------|-----------------------|-------------|------------------------------|------------------------------------------------------------|-----------------|-----------------------------------|--------------------------------------------------------------------------------------------------------------------------------------------------------------------------------------------------------------------------------------------------------------------------------------|
|                     |                              |                                                                         |                       |             |                              |                                                            |                 |                                   | between the two vaccine formats. These results showed that the MDV format of QIV was as safe and immunogenic as the PFS format in infants, children, and adolescents. These findings support the use of MDV QIV as a resource-saving alternative for seasonal influenza vaccination. |
| Robertson, 2019[18] | September 2016 – March 2017  | Fluzone (Sanofi Pasteur)<br><b>15-µg/strain</b><br>[1x0.5mL dose]       | 20.5 months<br>(8.55) | 6-35 months | 49.7                         | 47.25                                                      | 992             | Local and Systemic reactogenicity | No significant differences between full- and half-dose                                                                                                                                                                                                                               |



1  
2  
3  
4  
5  
6  
7  
8  
9  
10  
11  
12  
13  
14  
15  
16  
17  
18  
19  
20  
21  
22  
23  
24  
25  
26  
27  
28  
29  
30  
31  
32  
33  
34  
35  
36  
37  
38  
39  
40  
41  
42  
43  
44  
45  
46  
47

| Author, Year | Study period and countr(ies) | Treatment arms<br>Brand name (manufacturer)<br>HA/strain [dosing] | Mean age (SD)      | Age range   | Sex (overall % female) | Vaccination history (overall % previously immunized) | ITT sample size | Outcomes       | Author reported conclusions                                                                                                                                                                                                          |
|--------------|------------------------------|-------------------------------------------------------------------|--------------------|-------------|------------------------|------------------------------------------------------|-----------------|----------------|--------------------------------------------------------------------------------------------------------------------------------------------------------------------------------------------------------------------------------------|
|              | USA                          | Fluzone (Sanofi Pasteur)<br>7.5-µg/strain<br>[1x0.25 dose]        | 20.4 months (8.75) | 6-35 months | 49.7                   | 47.25                                                | 949             | Adverse events | groups.<br><br>AE leading to study discontinuation/ SAE not considered vaccine-related.<br><br>A full dose vaccine was immunogenic and had a safety profile comparable to that of a half dose, with no new safety concerns observed. |

**Abbreviations:** AE – adverse events; GMR – geometric mean ratio; GMFR – geometric mean fold rise; GMT - geometric mean antibody titer; HA - hemagglutinin; HAI - hemagglutination inhibition; ID – intradermal; IM – intramuscular; ITT – intent-to-treat; MDV – multi-dose vials, n – number of people with condition, N – sample size of treatment arm, NR – not reported, PFS – prefilled dose, SAEs – serious adverse events

## 211 **Safety outcomes**

212 Trivalent influenza vaccines

213 Six of the included RCTs assessed trivalent influenza vaccines (TIV) in young children (6-36  
214 months) and reported on local and systemic reactogenicity outcomes and other adverse  
215 events.[10-14, 19] Two RCTs compared the administration of full (0.5mL) and half (0.25mL)  
216 doses of the same standard 15µg/strain vaccine.[11, 19] The first RCT compared two full versus  
217 two half doses of TIV in previously unimmunized infants (6-11 months) and toddlers (12-23  
218 months) using Vaxigrip (15µg/strain).[11] The study found that in the infants group, two full 0.5-  
219 mL doses of vaccine did not increase reactogenicity. Local reactions were less common in  
220 infants than toddlers and more common with full doses versus half doses, but the differences  
221 were not statistically significant. An identified clinical trial registry compared a single  
222 intramuscular injection of 0.5mL to 0.25mL of FLUAD or Agrippal and showed comparable  
223 numbers of children with reactogenicity outcomes and other adverse events across the groups,  
224 but no significance levels or conclusions were provided by the investigators upon contact.[19]  
225 The objective of three of the included RCTs was to examine the impact of administering the full  
226 adult dose of 15µg/strain vaccines compared with the usual children's dose of 7.5µg/strain in  
227 infants and toddlers.[12-14] A multicenter RCT was conducted in Canada assessing the safety of  
228 full-dose Fluviral TIV (15µg/strain) compared with the half-dose (7.5µg/strain) and an active  
229 comparator Vaxigrip (7.5µg/strain).[12] Compared with the half-dose, the full-dose vaccine  
230 resulted in clinically similar reactogenicity and safety. A similar three-arm RCT to assess the use  
231 of Fluarix at two different dose levels (7.5µg/strain and 15µg/strain) compared to an established  
232 control vaccine Fluzone (7.5µg/strain) also found the reactogenicity and safety profile of Fluarix  
233 did not appear to be affected by doubling the dose, but one participant in the 15µg group had two

1  
2  
3 234 serious adverse events (apnea and cyanosis) that were considered by the investigator to be  
4  
5 235 possibly related to vaccination.[13] A third multicenter RCT compared the 15 µg/strain  
6  
7 236 formulation to the 7.5µg/strain formulation of Fluzone (Sanofi Pasteur) administered to young  
8  
9  
10 237 children across multiple influenza seasons.[14] This study also found no statistically significant  
11  
12 238 differences between the full-dose or half-dose groups for systemic reactions, local reactions or  
13  
14 239 adverse events when both seasons were combined; however, in the 2011–2012 season, 8 of 48  
15  
16 240 (16.7%) participants in the half-dose group compared with 32 of 96 (33.3%) in the full-dose  
17  
18 241 group had increased redness at the injection site ( $P < .05$ ).

19  
20  
21 242 Cioppa et al. (2009) was the only trial that compared the safety and tolerability of both TIV and  
22  
23 243 QIV vaccine formulations.[10] The vaccine arms of interest were a QIV 15-µg/strain, TIV 15-  
24  
25 244 µg/strain, QIV 7.5-µg/strain, TIV 7.5-µg/strain, and a control Vaxigrip TIV 7.5-µg/strain  
26  
27 245 vaccine. Reactogenicity of the 7.5-µg TIV/QIV formulations was slightly lower than for the  
28  
29 246 corresponding 15-µg formulations, but there was no difference in reactogenicity between TIV  
30  
31 247 and QIV vaccines.

32  
33  
34  
35 248 Quadrivalent influenza vaccines

36  
37  
38 249 Four of the included RCTs evaluated quadrivalent influenza vaccines (QIV) in children.[10, 16-  
39  
40 250 18] All of the studies reported reactogenicity outcomes and other adverse events. The Cioppa et  
41  
42 251 al. (2009) RCT reported both TIV and QIV vaccines and the results are reported above.[10] Two  
43  
44 252 studies compared full-dose QIV to pediatric 7.5µg/strain Fluzone. In the first RCT, full dose  
45  
46 253 Fluzone had a similar safety profile to half-dose Fluzone with a single adverse event being  
47  
48 254 attributed to the study vaccine.[18] Similarly, the second study found that full-dose Flulaval may  
49  
50 255 improve protection against influenza in some young children when compared to low-dose  
51  
52  
53 256 Fluzone, and in this RCT, none of the adverse events were considered to be study-related as

1  
2  
3 257 reported by the investigator.[16] The final trial evaluated Vaxigrip Tetra (15µg/strain)  
4  
5 258 administered to children and adolescents in two different formats.[17] Vaxigrip administered as a  
6  
7 259 single dose using a pre-filled syringe (PFS) was compared to a 10-dose multi-dose vial (MDV).  
8  
9  
10 260 Systemic reactions were reported in more infants aged 6 – 35 months in the MDV group than in  
11  
12 261 the PFS group; however this difference was not clinically significant. The authors concluded that  
13  
14 262 there was no difference in reactogenicity or safety between the two vaccine formats in infants,  
15  
16 263 children, and adolescents.  
17  
18

19 264 **RCTs in healthy adults (≥18 years old)**  
20

21 265 One RCT included healthy adults over 18 years, two studies included healthy adults from 18-45  
22  
23 266 and 18-65 years old, and one study included older healthy adults (≥ 65 years) (**Table 3**). Two  
24  
25 267 studies reported on effectiveness outcomes and three on reactogenicity and other adverse events.  
26  
27

28 268 All four RCTs evaluated Fluzone QIV.  
29  
30  
31  
32  
33  
34  
35  
36  
37  
38  
39  
40  
41  
42  
43  
44  
45  
46  
47  
48  
49  
50  
51  
52  
53  
54  
55  
56  
57  
58  
59  
60

269 **Table 3: Four RCTs conducted in adults (≥18 years old)**

| Author, Year                                 | Study period and countr(ies)            | Treatment arms<br>Brand name (manufacturer)<br>HA/strain [dosing]     | Mean age (SD)  | Age range | Sex (overall % female) | Vaccination history (overall % previously immunized) | ITT sample size | Relevant Outcomes                            | Author reported conclusions                                                                                                                                                                                                                                                                                                                                |
|----------------------------------------------|-----------------------------------------|-----------------------------------------------------------------------|----------------|-----------|------------------------|------------------------------------------------------|-----------------|----------------------------------------------|------------------------------------------------------------------------------------------------------------------------------------------------------------------------------------------------------------------------------------------------------------------------------------------------------------------------------------------------------------|
| <b>QUADRIVALENT INFLUENZA VACCINES (QIV)</b> |                                         |                                                                       |                |           |                        |                                                      |                 |                                              |                                                                                                                                                                                                                                                                                                                                                            |
| Kramer, 2006[20]                             | October 2004 – November 2004<br><br>USA | Fluzone (Aventis Pasteur),<br><b>15-µg/strain</b> [1 x 0.5mL dose]    | NR (>18 years) | >18 years | NR                     | NR                                                   | 222             | Lab-confirmed influenza                      | There was no significant difference between the full-dose and half-dose groups in the diagnosis of influenza or in the proportion of participants self-reporting four or more symptoms consistent with influenza-like illness.<br><br>No adverse events were noted by participants from either group or reported to the IRB during the course of the study |
|                                              |                                         | Fluzone (Aventis Pasteur),<br><b>7.5-µg/strain</b> [1 x 0.25 mL dose] | NR (>18 years) | >18 years | NR                     | NR                                                   | 222             | Influenza-like illness<br><br>Adverse events |                                                                                                                                                                                                                                                                                                                                                            |

| Author, Year     | Study period and countr(ies)  | Treatment arms<br>Brand name (manufacturer)<br>HA/strain [dosing]     | Mean age (SD)      | Age range   | Sex (overall % female) | Vaccination history (overall % previously immunized) | ITT sample size | Relevant Outcomes                                   | Author reported conclusions                                                                                                                                                                                                                                                                                                                                                                                                         |
|------------------|-------------------------------|-----------------------------------------------------------------------|--------------------|-------------|------------------------|------------------------------------------------------|-----------------|-----------------------------------------------------|-------------------------------------------------------------------------------------------------------------------------------------------------------------------------------------------------------------------------------------------------------------------------------------------------------------------------------------------------------------------------------------------------------------------------------------|
| Engler, 2008[21] | November 2004 – December 2004 | Fluzone (Aventis Pasteur),<br><b>15-µg/strain</b> [1 x 0.5mL dose]    | NR (18 – 64 years) | 18-64 years | 43.4                   | 0                                                    | 554             | Influenza-like illness<br>Hospital/ER visits        | The relative risk of medical visits and hospitalizations for influenza-like illnesses were similar in the half- and full-dose group regardless of age, and there was no evidence of ILI symptom differences by sex or dose during the 21 days after immunizations.<br><br>Although injection site pain was greater for full- vs half-dose (19.9% vs 14.4%; p=.01), when analyzed for clinically significant pain levels significant |
|                  | USA                           | Fluzone (Aventis Pasteur),<br><b>7.5-µg/strain</b> [1 x 0.25 mL dose] | NR (18 – 64 years) | 18-64 years | 43.4                   | 0                                                    | 556             | Local and Systemic reactogenicity<br>Adverse events |                                                                                                                                                                                                                                                                                                                                                                                                                                     |

1  
2  
3  
4  
5  
6  
7  
8  
9  
10  
11  
12  
13  
14  
15  
16  
17  
18  
19  
20  
21  
22  
23  
24  
25  
26  
27  
28  
29  
30  
31  
32  
33  
34  
35  
36  
37  
38  
39  
40  
41  
42  
43  
44  
45  
46  
47

| Author, Year     | Study period and countr(ies) | Treatment arms<br>Brand name (manufacturer)<br>HA/strain [dosing] | Mean age (SD)    | Age range   | Sex (overall % female) | Vaccination history (overall % previously immunized) | ITT sample size | Relevant Outcomes                 | Author reported conclusions                                                                                                                                                                                                     |
|------------------|------------------------------|-------------------------------------------------------------------|------------------|-------------|------------------------|------------------------------------------------------|-----------------|-----------------------------------|---------------------------------------------------------------------------------------------------------------------------------------------------------------------------------------------------------------------------------|
|                  |                              |                                                                   |                  |             |                        |                                                      |                 |                                   | <p>dose-dependent pain differences were not identified.</p> <p>Joint and/or muscle pain were significantly different (p=.02 and p=.03, respectively) by dose.</p> <p>No other adverse event differed significantly by dose.</p> |
| Belshe, 2007[22] | NR<br><br>USA                | Fluzone (Sanofi-Pasteur),<br><b>15-µg/strain</b> [1 x 0.5mL dose] | 31.5 years (9.6) | 18-49 years | 71.2                   | 0                                                    | 31              | Local and Systemic reactogenicity | Intradermal (ID) vaccine induced significantly more local inflammatory response than Intramuscular (IM) vaccine but this did not translate into an                                                                              |
|                  |                              | Fluzone (Sanofi-Pasteur),<br><b>9-µg/strain</b> [1 x 0.3mL dose]  | 31.2 years (9.4) | 18-49 years | 71.2                   | 0                                                    | 32              |                                   |                                                                                                                                                                                                                                 |

| Author, Year  | Study period and countr(ies) | Treatment arms<br>Brand name (manufacturer)<br>HA/strain [dosing] | Mean age (SD)     | Age range   | Sex (overall % female) | Vaccination history (overall % previously immunized) | ITT sample size | Relevant Outcomes                 | Author reported conclusions                                                                                               |
|---------------|------------------------------|-------------------------------------------------------------------|-------------------|-------------|------------------------|------------------------------------------------------|-----------------|-----------------------------------|---------------------------------------------------------------------------------------------------------------------------|
|               |                              | Fluzone (Sanofi-Pasteur),<br><b>6-µg/strain</b> [1 x 0.2mL dose]  | 30.1 years (10.3) | 18-49 years | 71.2                   | 0                                                    | 31              |                                   | increased immune response for ID vaccines compared to IM (primary comparison of this study was ID vs IM doses)            |
|               |                              | Fluzone (Sanofi-Pasteur),<br><b>3-µg/strain</b> [1 x 0.1mL dose]  | 31.9 years (10.3) | 18-49 years | 71.2                   | 0                                                    | 31              |                                   |                                                                                                                           |
| Chi, 2010[23] | August 2007-2008<br><br>USA  | Fluzone (Sanofi Pasteur),<br><b>15-µg/strain</b> [1 x 0.5mL dose] | 75.6 years (6.8)  | >65 years   | 17.8                   | 94.6                                                 | 65              | Local and Systemic reactogenicity | The two SAEs were acute coronary syndrome and appendicitis and neither were judged to be related to influenza vaccination |
|               |                              | Fluzone (Sanofi Pasteur),<br><b>9-µg/strain</b> [1 x 0.3mL dose]  | 75.2 years (7.7)  | >65 years   | 17.8                   | 94.6                                                 | 64              | Adverse events                    |                                                                                                                           |

**Abbreviations:** AE – adverse events, GMT - geometric mean antibody titer; HA - hemagglutinin; ID – intradermal; ILI – influenza-like illness; IM – intramuscular; MDV – multi-dose vials, n – number of people with condition, N – sample size of treatment arm, NR – not reported, PFS – prefilled syringe, SAE – serious adverse events



1  
2  
3 272 **Effectiveness outcomes**  
4

5 273 Two of the included RCTs that examined the same vaccine (Fluzone manufactured by Aventis  
6  
7 274 Pasteur) in healthy adult populations reported effectiveness outcomes including lab-confirmed  
8  
9  
10 275 influenza infections, influenza like illness, and/or hospitalizations or emergency room visits after  
11  
12 276 vaccination.[20, 21] The RCT by Kramer et al. (2006) found that 3.6% of participants receiving  
13  
14 277 a 15- $\mu$ g/strain dose of vaccine reported influenza like illness compared to 6.8% of participants  
15  
16 278 that received a 7.5- $\mu$ g/strain dose.[20] However, only one participant in the RCT that received  
17  
18 279 the 15- $\mu$ g/strain dose was confirmed via laboratory analysis to have influenza. The authors  
19  
20 280 concluded that half-dose and full-dose vaccinations appear to be similarly effective based on the  
21  
22 281 low rate of influenza infections and similar symptom surveys between both groups but  
23  
24 282 acknowledge that further studies examining immunogenicity are needed to confirm.  
25  
26  
27

28 283 A similar RCT by Engler et al. (2008) that compared a 15- $\mu$ g/strain dose of Fluzone vaccine to a  
29  
30 284 7.5- $\mu$ g/strain dose found equal proportions of participants reporting influenza like illness (9.7%  
31  
32 285 vs 9.9%) and hospitalizations or emergency room visits (0.3% v 0.2%).[21] The authors found  
33  
34 286 the relative risk of medical visits or hospitalizations between both groups was the same even  
35  
36 287 when adjusting for age and that age, sex, nor dose had an influence on the severity of influenza  
37  
38 288 like illness symptoms.  
39  
40

41  
42 289 **Safety outcomes**  
43

44 290 Three of the included studies in adult populations reported adverse events that occurred during  
45  
46 291 the trial while one RCT indicated that no adverse events were recorded for the duration of their  
47  
48 292 trial.[20-23] All three studies reporting adverse events compared different doses of Fluzone  
49  
50 293 vaccine including 3- $\mu$ g, 6- $\mu$ g, 7.5- $\mu$ g, 9- $\mu$ g, and 15- $\mu$ g per strain doses.  
51  
52  
53

54 294  
55  
56  
57  
58  
59  
60

1  
2  
3 295 Two of the studies were carried out in healthy adult populations and one RCT was conducted in  
4  
5 296 older healthy adults (>60 years of age).[21-23] One RCT found that joint or muscle pain  
6  
7 297 following vaccination was statistically significantly higher in the full dose (15- $\mu$ g) group  
8  
9 298 compared to the half-dose (7.5- $\mu$ g) group and that while injection site pain initially appeared to  
10  
11 299 be statistically significantly higher in the full dose group, when adjusted to include only  
12  
13 300 clinically significant pain levels (>3 out of 5 on a visual analogue scale) the difference was no  
14  
15 301 longer statistically significant.[21] The RCT found no differences in occurrence or severity of  
16  
17 302 any other adverse effects. Similarly, one RCT comparing four different doses of Fluzone (3- $\mu$ g,  
18  
19 303 6- $\mu$ g, 9- $\mu$ g, and 15- $\mu$ g per strain) did not report any differences between the IM vaccination  
20  
21 304 groups.[22] Finally, the RCT in older adults also found no difference in the occurrence or  
22  
23 305 severity of adverse events in the low dose (9- $\mu$ g) versus high dose (15- $\mu$ g) group and found no  
24  
25 306 serious adverse events that were considered related to the vaccine.[23]

## 31 **DISCUSSION**

32  
33 308 PHAC commissioned this rapid scoping review to identify the evidence for efficacy and safety of  
34  
35 309 fractional influenza vaccine dosing for intramuscular administration of seasonal influenza  
36  
37 310 vaccines in healthy individuals of all ages that have been evaluated in human trials. Thirteen  
38  
39 311 RCTs published between 2006 and 2019 comparing standard/full-dose and half/low-dose  
40  
41 312 vaccines were included in this scoping review after a comprehensive search of three electronic  
42  
43 313 databases, trial registries and references of relevant systematic reviews. The majority of the  
44  
45 314 included RCTs were conducted in children and evaluated trivalent influenza vaccines (TIV).  
46  
47 315 In young, healthy children, there were no effectiveness outcomes of interest reported. However,  
48  
49 316 local reactogenicity, systemic reactogenicity and adverse events were comparable across the full-  
50  
51 317 dose and half-dose TIV and QIV vaccine arms. In addition, the authors of one RCT in children  
52  
53  
54  
55  
56  
57  
58  
59  
60

1  
2  
3 318 and adolescents that compared full-dose QIV using pre-filled syringes (PFS) versus multi-dose  
4  
5 319 vials (MDV) also found no statistically significant differences in safety outcomes between  
6  
7 320 administration formats. In healthy adults (including older adults), half-dose QIV was considered  
8  
9 321 equally effective as high-dose in the two RCTs that assessed clinical effectiveness. Safety  
10  
11 322 profiles were similar across groups in all 4 RCTs.

12  
13  
14 323 A full systematic review with meta-analysis based on the studies included in this scoping review  
15  
16 324 was conducted by the NACI and the report was published in January of 2021.[3] The report  
17  
18 325 found that there is some, but still insufficient, evidence that fractional doses of influenza vaccine  
19  
20 326 provided via the intramuscular route are effective and immunogenic in healthy individuals.  
21  
22 327 NACI concludes that since many of those at high risk of influenza (e.g., adults 65 years of age  
23  
24 328 and older, individuals with specific underlying chronic health conditions) may have a lower  
25  
26 329 immune response to influenza vaccination already (due to immunosenescence in older adults or a  
27  
28 330 condition that alters immune function), it is important to ensure that those at high risk continue to  
29  
30 331 receive the full dose of influenza vaccine.

### 332 **Future research**

333 Dose-sparing approaches such as intradermal (ID) immunisation vaccination exhibits similar, or  
334 even enhanced, immunogenicity, when using a fractional dose only, as compared to  
335 intramuscular or subcutaneous immunisation, and should be explored in future scoping  
336 reviews.[24]

### 337 **CONCLUSIONS**

338 In our scoping review, we found 13 RCTs on the efficacy and safety of fractional doses of  
339 influenza vaccine provided via the intramuscular route to healthy adults and children. These  
340 studies were used to inform a systematic review with meta-analysis which were commissioned

1  
2  
3 341 by the PHAC. We found that due to the low number of studies in healthy adults and the lack of  
4  
5 342 studies assessing confirmed influenza and influenza-like illness, there remains a need for further  
6  
7 343 evaluation of the clinical effectiveness of IM dose-sparing strategies using vaccines currently  
8  
9 344 available in this population.  
10  
11  
12  
13  
14  
15  
16  
17  
18  
19  
20  
21  
22  
23  
24  
25  
26  
27  
28  
29  
30  
31  
32  
33  
34  
35  
36  
37  
38  
39  
40  
41  
42  
43  
44  
45  
46  
47  
48  
49  
50  
51  
52  
53  
54  
55  
56  
57  
58  
59  
60

For peer review only

1  
2  
3 345 **LIST OF ABBREVIATIONS**  
4

5 346 PHAC – Public Health Agency of Canada  
6

7  
8 347 CIHR – Canadian Institutes of Health Research  
9

10 348 DSEN – Drug Safety and Effectiveness Network  
11

12 349 MAGIC – Methods and Application Group in Indirect Comparisons  
13

14 350 PRISMA-ScR – Preferred Reporting Items for Systematic Reviews and Meta-analysis extension  
15

16  
17 351 to scoping reviews  
18

19 352 ICU – Intensive Care Unit  
20

21 353 RCT – Randomized controlled trials  
22

23 354 NRCTs – non-randomized controlled trials  
24

25 355 TIV – Trivalent Influenza Vaccine  
26

27 356 AE – Adverse Events  
28

29 357 SAE – Serious adverse events  
30

31 358 QIV – Quadrivalent Influenza Vaccine  
32

33 359 PFS – Pre-filled syringe  
34

35 360 MDV – Multi-dose vial  
36

37  
38  
39 361 **DECLARATIONS**  
40

41 362 **Ethics approval and consent to participate**  
42

43 363 Not applicable  
44

45 364 **Consent for publication**  
46

47 365 Not applicable  
48  
49  
50  
51  
52  
53  
54  
55  
56  
57  
58  
59  
60

1  
2  
3 366 **Availability of data and materials**  
4

5 367 The dataset(s) supporting the conclusions of this article is(are) included within the article (and its  
6  
7  
8 368 additional file(s)).  
9

10 369 **Competing interests**  
11

12 370 The authors have no competing interests to declare.  
13

14 371 **Funding**  
15

16  
17 372 This work was supported through the Drug Safety and Effectiveness Network funded by the  
18  
19 373 Canadian Institutes of Health Research, the funders had no involvement in the design, conduct,  
20  
21 374 or publication of this study. SES is funded by a Tier 1 Canada Research Chair in Knowledge  
22  
23 375 Translation and the Mary Trimmer Chair in Geriatric Medicine; ACT is funded by a Tier 2  
24  
25 376 Canada Research Chair in Knowledge Synthesis.  
26  
27

28 377 **Open Access**  
29

30 378 This is an Open Access article distributed in accordance with the Creative Commons Attribution  
31  
32 379 Non Commercial (CC BY-NC 4.0) license, which permits others to distribute, remix, adapt,  
33  
34 380 build upon this work non-commercially, and license their derivative works on different terms,  
35  
36 381 provided the original work is properly cited and the use is non-commercial. See:  
37  
38 382 <http://creativecommons.org/licenses/by-nc/4.0/>  
39  
40  
41

42 383 **Authors' contributions**  
43

44 384 CL wrote and revised the final manuscript. JA and PR screened citations and full-text articles,  
45  
46 385 abstracted and verified data, interpreted results and wrote the first draft manuscript. CW and NR  
47  
48 386 screened citations and full-text articles, abstracted data, and reviewed the manuscript. SES and  
49  
50 387 ACT developed the protocol, obtained funding, interpreted results, and edited the manuscript.  
51  
52  
53  
54  
55  
56  
57  
58  
59  
60

1  
2  
3 388 **Acknowledgements**  
4

5 389 The authors would like to thank Jessie McGowan for her assistance in developing literature  
6  
7 390 searches, Tamara Radar for PRESS of literature search, Alissa Epworth for her assistance  
8  
9 391 executing searches and retrieving articles, and Navjot Mann for her assistance in contacting  
10  
11 392 author's and formatting this manuscript.  
12  
13

14 393 **Additional files**  
15

16 394 **File Format:** Microsoft Word (.docx)  
17

18 395 **Title of Data:** Additional File 1 (Appendices 1-7)  
19

20 396 **Description of Data:** The appendices include the following additional information:  
21

22 397 Appendix 1 – MEDLINE search strategy  
23

24 398 Appendix 2 – EMBASE search strategy  
25

26 399 Appendix 3 – Cochrane search strategy  
27

28 400 Appendix 4 – List of eligible vaccines  
29

30 401 Appendix 5 – Excluded dose-sparing studies  
31

32 402 Appendix 6 – Study and patient data  
33

34 403 Appendix 7 – Treatment and outcome data  
35

36 404 **FIGURE LEGEND**  
37

38 405 Figure 1. Flow chart of studies included in the review  
39

40 406 Study flow diagram.  
41  
42  
43  
44  
45  
46  
47  
48  
49  
50  
51  
52  
53  
54  
55  
56  
57  
58  
59  
60

## 407 REFERENCES

- 408 1. PHAC. Seasonal Influenza Vaccination Coverage in Canada, 2019-2020, 2020.
- 409 2. PHAC. Canadian Immunization Guide Chapter on Influenza and Statement on Seasonal  
410 Influenza Vaccine for 2019–2020, 2019.
- 411 3. PHAC. Recommendations on fractional influenza vaccine dosing, 2021.
- 412 4. Peters MDJ, Marnie C, Tricco AC, et al. Updated methodological guidance for the conduct of  
413 scoping reviews. *JBI Evid Synth* 2020;18(10):2119-26. doi: 10.11124/jbies-20-00167  
414 [published Online First: 2020/10/11]
- 415 5. World Health Organization AfHPaSR. Rapid reviews to strengthen health policy and systems:  
416 a practical guide. In: Andrea C. Tricco EVLaSES, ed., 2017:119.
- 417 6. Tricco AC, Lillie E, Zarin W, et al. PRISMA Extension for Scoping Reviews (PRISMA-ScR):  
418 Checklist and Explanation. *Ann Intern Med* 2018;169(7):467-73. doi: 10.7326/m18-0850
- 419 7. Rubin LG, Levin MJ, Ljungman P, et al. 2013 IDSA Clinical Practice Guideline for  
420 Vaccination of the Immunocompromised Host. *Clinical Infectious Diseases*  
421 2013;58(3):e44-e100. doi: 10.1093/cid/cit684
- 422 8. Hervé C, Laupèze B, Del Giudice G, et al. The how's and what's of vaccine reactogenicity.  
423 *npj Vaccines* 2019;4(1):39. doi: 10.1038/s41541-019-0132-6
- 424 9. Synthesi.SR [program]. Toronto, Canada: Knowledge Translation Program, St. Michael's  
425 Hospital, 2012.
- 426 10. Della Cioppa G, Vesikari T, Sokal E, et al. Trivalent and quadrivalent MF59®-adjuvanted  
427 influenza vaccine in young children: a dose-and schedule-finding study. *Vaccine*  
428 2011;29(47):8696-704.
- 429 11. Skowronski DM, Hottes TS, Chong M, et al. Randomized controlled trial of dose response to  
430 influenza vaccine in children aged 6 to 23 months. *Pediatrics* 2011;128(2):e276-89. doi:  
431 10.1542/peds.2010-2777 [published Online First: 2011/07/20]
- 432 12. Langley JM, Vanderkooi OG, Garfield HA, et al. Immunogenicity and safety of 2 dose levels  
433 of a thimerosal-free trivalent seasonal influenza vaccine in children aged 6–35 months: a  
434 randomized, controlled trial. *J Pediatric Infect Dis Soc* 2012;1(1):55-63.
- 435 13. Pavia-Ruz N, Angel Rodriguez Weber M, Lau Y-L, et al. A randomized controlled study to  
436 evaluate the immunogenicity of a trivalent inactivated seasonal influenza vaccine at two  
437 dosages in children 6 to 35 months of age. *Hum Vaccin Immunother* 2013;9(9):1978-88.
- 438 14. Halasa NB, Gerber MA, Berry AA, et al. Safety and immunogenicity of full-dose trivalent  
439 inactivated influenza vaccine (TIV) compared with half-dose TIV administered to  
440 children 6 through 35 months of age. *J Pediatric Infect Dis Soc* 2015;4(3):214-24.
- 441 15. Phung A. Clinical Trial Results: A Phase IIIB, observer-blind, randomized, parallel groups,  
442 extension study to evaluate the immunogenicity and safety following a single  
443 intramuscular dose of FLUAD or Agridipal S1 influenza vaccines in healthy children  
444 previously vaccinated in the V70P5 study. . July 29, 2016 ed, 2016.
- 445 16. Jain VK, Domachowske JB, Wang L, et al. Time to change dosing of inactivated  
446 quadrivalent influenza vaccine in young children: evidence from a phase III, randomized,  
447 controlled trial. *J Pediatric Infect Dis Soc* 2017;6(1):9-19.
- 448 17. Ojeda J, Arredondo JL, Salcedo P, et al. Immunogenicity and safety of a multi-dose  
449 quadrivalent inactivated influenza vaccine in individuals aged 6 months to 17 years: a  
450 randomized phase III trial. *Hum Vaccin Immunother* 2019:1-5.



- 1  
2  
3 451 18. Robertson CA, Mercer M, Selmani A, et al. Safety and Immunogenicity of a Full-dose, Split-  
4 452 virion, Inactivated, Quadrivalent Influenza Vaccine in Healthy Children 6-35 Months of  
5 453 Age: A Randomized Controlled Clinical Trial. *Pediatr Infect Dis J* 2019;38(3):323-28.  
6 454 doi: 10.1097/inf.0000000000002227 [published Online First: 2018/11/06]  
7  
8 455 19. ClinicalTrialsRegister.eu. A Phase IIIB, observer-blind, randomized, parallel groups,  
9 456 extension study to evaluate the immunogenicity and safety following a single  
10 457 intramuscular dose of FLUAD or Agrippal S1 influenza vaccines in healthy children  
11 458 previously vaccinated in the V70P5 study. May 15, 2015 ed, 2015.  
12 459 20. Kramer JS, Durham C, Schroeder T, et al. Effectiveness of half-dose versus full-dose  
13 460 influenza vaccine in health care workers. *Am J Health Syst Pharm* 2006;63(21):2111-15.  
14 461 21. Engler RJ, Nelson MR, Klote MM, et al. Half-vs full-dose trivalent inactivated influenza  
15 462 vaccine (2004-2005): age, dose, and sex effects on immune responses. *Arch Intern Med*  
16 463 2008;168(22):2405-14.  
17 464 22. Belshe RB, Newman FK, Wilkins K, et al. Comparative immunogenicity of trivalent  
18 465 influenza vaccine administered by intradermal or intramuscular route in healthy adults.  
19 466 *Vaccine* 2007;25(37-38):6755-63.  
20 467 23. Chi RC, Rock MT, Neuzil KM. Immunogenicity and safety of intradermal influenza  
21 468 vaccination in healthy older adults. *Clin Infect Dis* 2010;50(10):1331-8. doi:  
22 469 10.1086/652144 [published Online First: 2010/04/10]  
23 470 24. Schnyder JL, De Pijper CA, Garcia Garrido HM, et al. Fractional dose of intradermal  
24 471 compared to intramuscular and subcutaneous vaccination - A systematic review and  
25 472 meta-analysis. *Travel Med Infect Dis* 2020;37:101868. doi: 10.1016/j.tmaid.2020.101868  
26 473 [published Online First: 2020/09/09]

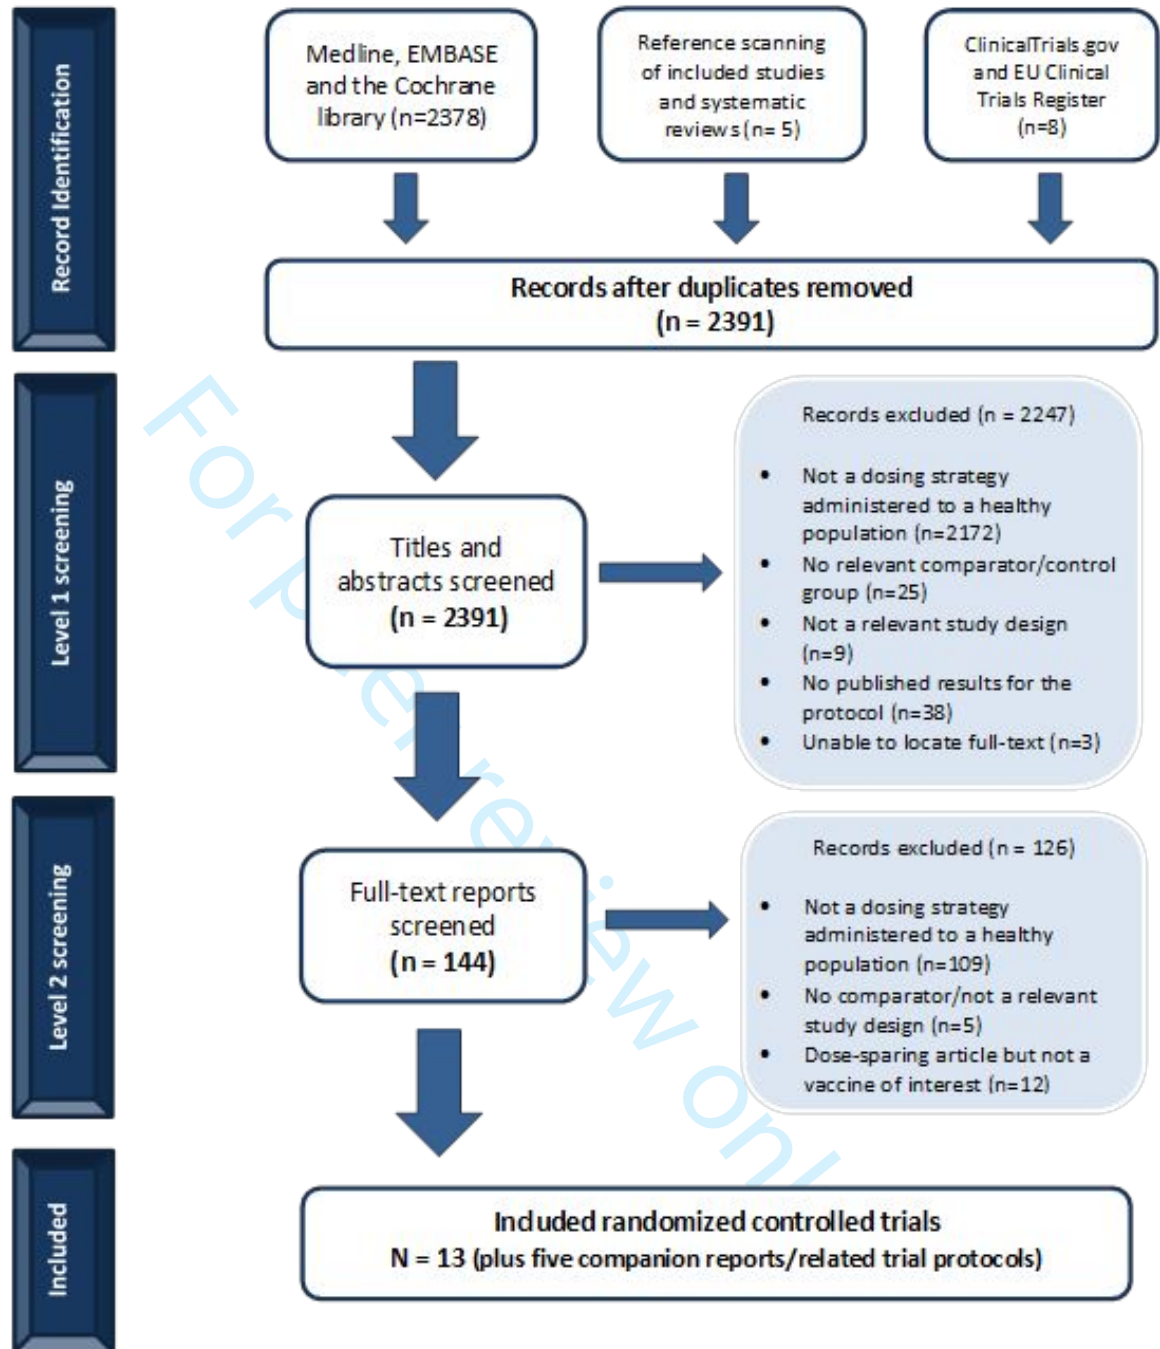

## APPENDIX 1 – MEDLINE search strategy

Database: Ovid MEDLINE(R) ALL <1946 to May 29, 2020>

### Search Strategy:

-----

- 1 influenza, human/ or exp influenza a virus/ or exp influenzavirus b/ or influenzavirus c/
- 2 (flu or flue or influenza\* or grippe).tw,kf.
- 3 1 or 2
- 4 exp Vaccines/ or Immunization/
- 5 (vaccin\* or immuni\* or inocula\* or shot or jab).tw,kf.
- 6 4 or 5
- 7 3 and 6
- 8 influenza vaccines/ or Adjuvants, Immunologic/
- 9 (LAIV or Fluenz or FluMist or Afluria or Fluad or Fluzone or Flulaval or Fluarix or Flublok or
- 10 Flucelvax or FluQuadri or Vaxigrip or Influvac or Fluvirin or Agrippal or Begrivac or Fluad or
- 11 agriflu or fluviral).tw,kf.
- 12 7 or 8 or 9
- 13 Injections, Intramuscular/
- 14 (intramuscular or intra-muscular).tw,kf.
- 15 or/11-12
- 16 10 and 13
- 17 limit 14 to yr=2000-current
- 18 animals/ not humans/
- 19 15 not 16
- 20 ad.fs.
- 21 11 or 12 or 18
- 22 10 and 19
- 23 exp dose-response relationship, immunologic/
- 24 dose-Response Relationship, Drug/
- 25 (Dos\* sparing or Dose -sparing or half-dose or dose-response or dose response or dose
- 26 effect\* or dose-effect\* or fractional dos\*).tw,kf.
- 27 ((reduc\* or lower or less) adj2 (quantity or strength or standard)).tw,kf.
- 28 ((dos\* adj3 change) or (half adj3 dos\*)).tw,kf.
- 29 ((down adj3 titrat\*) or (dose adj3 titrat\*) or (dose adj3 reduc\*) or (dose adj3 "de-escalat\*")
- 30 or (dose adj3 taper\*)).tw,kf.
- 31 or/21-26
- 32 20 and 27
- 33 animals/ not humans/
- 34 28 not 29
- 35 limit 30 to yr=2000-current
- 36 17 or 31

## APPENDIX 2 – EMBASE search strategy

Database: Ovid MEDLINE(R) Embase <2000 to June 11, 2020>

### Search Strategy:

-----

1 influenza, human/ or exp influenza a virus/ or exp influenzavirus b/ or influenzavirus c/  
 2 (flu or flue or influenza\* or grippe).tw,kf.  
 3 1 or 2  
 4 exp Vaccines/ or Immunization/  
 5 (vaccin\* or immuni\* or inocula\* or shot or jab).tw,kf.  
 6 4 or 5  
 7 3 and 6  
 8 influenza vaccines/ or Adjuvants, Immunologic/  
 9 (LAIV or Fluenz or FluMist or Afluria or Fluad or Fluzone or Flulaval or Fluarix or Flublok  
 or Flucelvax or FluQuadri or Vaxigrip or Influvac or Fluvirin or Agrippal or Begrivac or Fluad or  
 agriflu or fluviral).tw,kf.  
 10 7 or 8 or 9  
 11 Injections, Intramuscular/  
 12 (intramuscular or intra-muscular).tw,kf.  
 13 or/11-12  
 14 10 and 13  
 15 limit 14 to yr=2009-current  
 16 animals/ not humans/  
 17 15 not 16  
 18 ad.fs.  
 19 11 or 12 or 18  
 20 10 and 19  
 21 exp dose-response relationship, immunologic/  
 22 dose-Response Relationship, Drug/  
 23 (Dos\* sparing or Dose -sparing or half-dose or dose-response or dose response or dose  
 effect\* or dose-effect\* or fractional dos\*).tw,kf.  
 24 ((reduc\* or lower or less) adj2 (quantity or strength or standard)).tw,kf.  
 25 ((dos\* adj3 change) or (half adj3 dos\*)).tw,kf.  
 26 ((down adj3 titrat\*) or (dose adj3 titrat\*) or (dose adj3 reduc\*) or (dose adj3  
 "de-escalat\*") or (dose adj3 taper\*)).tw,kf.  
 27 or/21-26  
 28 20 and 27  
 29 animals/ not humans/  
 30 28 not 29  
 31 limit 30 to yr=2009-current  
 32 17 or 31  
 33 32 use ppez  
 34 exp Influenza virus/ or exp influenza/  
 35 (flu or flue or influenza\* or grippe).tw.  
 36 34 or 35  
 37 exp vaccine/  
 38 exp immunization/  
 39 influenza vaccination/ or vaccination/  
 40 (vaccin\* or immuni\* or inocula\* or shot or jab).tw.

1  
2  
3  
4  
5  
6 41 or/37-40  
7 42 36 and 41  
8 43 influenza vaccination/  
9 44 immunological adjuvant/  
10 45 (LAIV or Fluenz or FluMist or Afluria or Fluad or Fluzone or Flulaval or Fluarix or Flublok  
11 or Flucelvax or FluQuadri or Vaxigrip or Influvac or Fluvirin or Agrippal or Begrivac or Fluad or  
12 agriflu or fluviral).tw.  
13 46 or/42-45  
14 47 intramuscular drug administration/  
15 48 (intramuscular or intra-muscular).tw.  
16 49 47 or 48  
17 50 46 and 49  
18 51 limit 50 to yr="2009 -Current"  
19 52 animals/ not humans/  
20 53 51 not 52  
21 54 ad.fs.  
22 55 49 or 54  
23 56 46 and 55  
24 57 dose response/ or drug response/  
25 58 (Dos\* sparing or Dose -sparing or half-dose or dose-response or dose response or dose  
26 effect\* or dose-effect\* or fractional dos\*).tw.  
27 59 ((reduc\* or lower or less) adj2 (quantity or strength or standard)).tw.  
28 60 ((dos\* adj3 change) or (half adj3 dos\*)).tw.  
29 61 ((down adj3 titrat\*) or (dose adj3 titrat\*) or (dose adj3 reduc\*) or (dose adj3  
30 "de-escalat\*") or (dose adj3 taper\*)).tw.  
31 62 or/57-61  
32 63 56 and 62  
33 64 animals/ not humans/  
34 65 63 not 64  
35 66 limit 65 to yr="2009 -Current"  
36 67 53 or 66  
37 68 67 use emczd  
38 69 33 or 68  
39 70 remove duplicates from 69  
40  
41  
42  
43  
44  
45  
46  
47  
48  
49  
50  
51  
52  
53  
54  
55  
56  
57  
58  
59  
60

### APPENDIX 3 – Cochrane search strategy

Database: Database: EBM Reviews - Cochrane Database of Systematic Reviews <2005 to June 03, 2020>, EBM Reviews - ACP Journal Club

<1991 to May 2020>, EBM Reviews - Database of Abstracts of Reviews of Effects <1st Quarter 2016>, EBM Reviews - Cochrane

Clinical Answers <May 2020>, EBM Reviews - Cochrane Central Register of Controlled Trials <May 2020>, EBM Reviews -

Cochrane Methodology Register <3rd Quarter 2012>, EBM Reviews - Health Technology Assessment <4th Quarter 2016>, EBM

Reviews - NHS Economic Evaluation Database <1st Quarter 2016>

Search Strategy:

- 
- 1 (influenza, human or influenza a virus or influenzavirus b or influenzavirus c).kw.
  - 2 (flu or flue or influenza\* or grippe).ti,ab.
  - 3 1 or 2
  - 4 (Vaccines or Immunization).kw.
  - 5 (vaccin\* or immuni\* or inocula\* or shot or jab).ti,ab.
  - 6 4 or 5
  - 7 3 and 6
  - 8 (influenza vaccines or Adjuvants, Immunologic).kw.
  - 9 (LAIV or Fluenz or FluMist or Afluria or Fluad or Fluzone or Flulaval or Fluarix or Flublok or Flucelvax or FluQuadri or Vaxigrip or Influvac or Fluvirin or Agrippal or Begrivac or Fluad or agriflu or fluviral).ti,ab.
  - 10 7 or 8 or 9
  - 11 Injections, Intramuscular.kw.
  - 12 (intramuscular or intra-muscular).ti,ab.
  - 13 11 or 12
  - 14 10 and 13
  - 15 dose-response relationship, immunologic.kw.
  - 16 dose-Response Relationship, Drug.kw.
  - 17 (Dos\* sparing or Dose -sparing or half-dose or dose-response or dose response or dose effect\* or dose-effect\* or fractional dos\*).ti,ab.
  - 18 ((reduc\* or lower or less) adj2 (quantity or strength or standard)).ti,ab.
  - 19 ((dos\* adj3 change) or (half adj3 dos\*)).ti,ab.
  - 20 ((down adj3 titrat\*) or (dose adj3 titrat\*) or (dose adj3 reduc\*) or (dose adj3 "de-escalat\*") or (dose adj3 taper\*)).ti,ab.
  - 21 or/15-20
  - 22 10 and 21
  - 23 14 or 22
  - 24 limit 23 to yr="2009 -Current" [Limit not valid in DARE; records were retained]

Database: EBM Reviews - Cochrane Database of Systematic Reviews <2005 to June 03, 2020>, EBM Reviews - ACP Journal Club

<1991 to May 2020>, EBM Reviews - Database of Abstracts of Reviews of Effects <1st Quarter 2016>, EBM Reviews - Cochrane

1  
2  
3  
4  
5  
6 **Clinical Answers <May 2020>, EBM Reviews - Cochrane Central Register of Controlled**  
7 **Trials <May 2020>, EBM Reviews -**  
8 **Cochrane Methodology Register <3rd Quarter 2012>, EBM Reviews - Health Technology**  
9 **Assessment <4th Quarter 2016>, EBM**  
10 **Reviews - NHS Economic Evaluation Database <1st Quarter 2016>**  
11 **Search Strategy:**  
12

- 
- 13 1 (influenza, human or influenza a virus or influenzavirus b or influenzavirus c).kw.  
14 2 (flu or flue or influenza\* or grippe).ti,ab.  
15 3 1 or 2  
16 4 (Vaccines or Immunization).kw.  
17 5 (vaccin\* or immuni\* or inocula\* or shot or jab).ti,ab.  
18 6 4 or 5  
19 7 3 and 6  
20 8 (influenza vaccines or Adjuvants, Immunologic).kw.  
21 9 (LAIV or Fluenz or FluMist or Afluria or Fluad or Fluzone or Flulaval or Fluarix or Flublok or  
22 Flucelvax or  
23 FluQuadri or Vaxigrip or Influvac or Fluvirin or Agrippal or Begrivac or Fluad or agriflu or  
24 fluviral).ti,ab.  
25 10 7 or 8 or 9  
26 11 Injections, Intramuscular.kw.  
27 12 (intramuscular or intra-muscular).ti,ab.  
28 13 11 or 12  
29 14 10 and 13  
30 15 dose-response relationship, immunologic.kw.  
31 16 dose-Response Relationship, Drug.kw.  
32 17 (Dos\* sparing or Dose -sparing or half-dose or dose-response or dose response or dose  
33 effect\* or dose-effect\* or  
34 fractional dos\*).ti,ab.  
35 18 ((reduc\* or lower or less) adj2 (quantity or strength or standard)).ti,ab.  
36 19 ((dos\* adj3 change) or (half adj3 dos\*)).ti,ab.  
37 20 ((down adj3 titrat\*) or (dose adj3 titrat\*) or (dose adj3 reduc\*) or (dose adj3 "de-escalat\*")  
38 or (dose adj3  
39 taper\*).ti,ab.  
40 21 or/15-20  
41 22 10 and 21  
42 23 14 or 22  
43 24 limit 23 to yr="2000 - 2008" [Limit not valid in DARE; records were retained]  
44 25 from 24 keep 1-173  
45  
46  
47  
48  
49  
50  
51  
52  
53  
54  
55  
56  
57  
58  
59  
60

## APPENDIX 4 – List of eligible vaccines

| Product name (manufacturer)                         | Vaccine Characteristic |                                   |                                                     |                                                                    |                                                                                |
|-----------------------------------------------------|------------------------|-----------------------------------|-----------------------------------------------------|--------------------------------------------------------------------|--------------------------------------------------------------------------------|
|                                                     | Vaccine type           | Route of administration           | Authorized ages for use                             | Antigen content for each vaccine strain                            | Formats available                                                              |
| Flulaval Tetra (GSK)                                | IIV4-SD (split virus)  | IM                                | 6 months and older                                  | 15 µg HA /0.5 mL dose                                              | 5 mL multi-dose vial<br>Single dose pre-filled syringe                         |
| Fluzone Quadrivalent (Sanofi Pasteur)               | IIV4-SD (split virus)  | IM                                | 6 months and older                                  | 15 µg HA /0.5 mL dose                                              | 5 mL multi-dose vial<br>Single dose pre-filled syringe without attached needle |
| Afluria Tetra (Seqirus)                             | IIV4-SD (split virus)  | IM                                | 5 years and older                                   | 15 µg HA /0.5 mL dose                                              | Up to expiry date indicate on vial label                                       |
| Influvac Tetra (BGP Pharma ULC, operating as Mylan) | IIV4-SD (subunit)      | IM or deep subcutaneous injection | 3 years and older                                   | 15 µg HA /0.5 mL dose                                              | Single dose pre-filled syringe with or without a needle                        |
| Vaxigrip Tetra                                      | IIV4                   | IM                                | 6 months and older                                  | Pediatric: 7.5 µg HA /0.25 mL dose<br>Adult: 15 µg HA /0.5 mL dose | 0.5 mL pre-filled syringe                                                      |
| Fluarix Tetra/ Influsplit Tetra (GSK)               | IIV4                   | IM                                | 6 months and older                                  | 15 µg HA /0.5 mL dose                                              | 0.5 mL pre-filled syringe                                                      |
| Agriflu (Seqirus)                                   | IIV3-SD (subunit)      | IM                                | 6 months and older                                  | 15 µg HA /0.5 mL dose                                              | 5 mL multi-dose vial<br>Single dose pre-filled syringe without attached needle |
| Fluad Pediatric and Fluad (Seqirus)                 | IIV3-Adj (subunit)     | IM                                | Pediatric: 6-23 months<br>Adult: 65 years and older | Pediatric: 7.5 µg HA /0.25 mL dose<br>Adult: 15 µg HA /0.5 mL dose | Single dose pre-filled syringe without a needle                                |
| Fluviral (GSK)                                      | IIV3-SD (split virus)  | IM                                | 6 months and older                                  | 15 µg HA /0.5 mL dose                                              | 5 mL multi-dose vial                                                           |
| Fluzone TIV (Sanofi Pasteur)                        | IIV3-HD (split virus)  | IM                                | 65 years and older                                  | Adult: 15 µg HA /0.5 mL dose                                       | 0.5 mL pre-filled syringe                                                      |
| Vaxigrip TIV                                        | IIV3-SD                | IM                                | 6 months and older                                  | Pediatric: 7.5 µg HA /0.25 mL dose<br>Adult: 15 µg HA /0.5 mL dose | 0.5 mL pre-filled syringe                                                      |

**Note:** list of vaccines included in the review is based on feedback from PHAC and the 2020-2021 seasonal vaccine availability in Canada found here: <https://www.canada.ca/en/public-health/services/publications/vaccines-immunization/canadian-immunization-guide-statement-seasonal-influenza-vaccine-2020-2021.html#appA>



## APPENDIX 5 – Excluded dose-sparing studies

| Reference                                                                                                                                                                                                                                                                                                                                                                                                                                                                                                                             | Reason for exclusion                                                     |
|---------------------------------------------------------------------------------------------------------------------------------------------------------------------------------------------------------------------------------------------------------------------------------------------------------------------------------------------------------------------------------------------------------------------------------------------------------------------------------------------------------------------------------------|--------------------------------------------------------------------------|
| 1 Euctr, H. U. A Randomized, Double-blind, Multi-Center Study to Evaluate Safety and Immunogenicity of One Dose of Four FLUVAL AB-like (Trivalent, Whole Virus, Aluminium Phosphate Gel Adjuvanted) Influenza Vaccines Containing 3.5[micro]gHA, 6[micro]gHA, 9[micro]gHA or 1. 2011. Available from: <a href="http://www.who.int/trialsearch/Trial2.aspx?TrialID=EUCTR2011">http://www.who.int/trialsearch/Trial2.aspx?TrialID=EUCTR2011</a>                                                                                         | exclude - dose-sparing but vaccine not of interest                       |
| 2 Vajo Z, Tamas F, Jankovics I. A reduced-dose seasonal trivalent influenza vaccine is safe and immunogenic in adult and elderly patients in a randomized controlled trial. <i>Clin Vaccine Immunol.</i> 2012;19(3):313-318. doi:10.1128/CVI.05619-11                                                                                                                                                                                                                                                                                 | exclude - dose-sparing but vaccine not of interest                       |
| 3 Treanor J, Keitel W, Belshe R, et al. Evaluation of a single dose of half strength inactivated influenza vaccine in healthy adults. <i>Vaccine.</i> 2002;20(7-8):1099-1105. doi:10.1016/s0264-410x(01)00440-6                                                                                                                                                                                                                                                                                                                       | exclude - dose-sparing but vaccine not of interest                       |
| 4 Euctr. A Randomized, Active Controlled, Double-blind, Multi-Centre Study to Evaluate Safety and Immunogenicity of One Dose of FLUVAL AB-like (Trivalent, Whole Virus, Aluminium Phosphate Gel Adjuvanted) Influenza Vaccine Containing 6µgHA of Seasonal A/H1N1, A/H3N2 and B Influenza Antigens in Non-elderly Adult and Elderly Subjects. 2011. Available from: <a href="http://www.who.int/trialsearch/Trial2.aspx?TrialID=EUCTR2011-003314-16-HU">http://www.who.int/trialsearch/Trial2.aspx?TrialID=EUCTR2011-003314-16-HU</a> | exclude - dose-sparing but experimental vaccine                          |
| 5 Euctr, E. S. Clinical study to compare the safety of two influenza vaccines in children and adolescents of 3 to less than 18 years of age at risk for influenza-related complications. 2013. Available from: <a href="http://www.who.int/trialsearch/Trial2.aspx?TrialID=EUCTR2013">http://www.who.int/trialsearch/Trial2.aspx?TrialID=EUCTR2013</a>                                                                                                                                                                                | exclude - dose-sparing but experimental vaccine                          |
| 6 Pillet S, Aubin É, Trépanier S, et al. A plant-derived quadrivalent virus like particle influenza vaccine induces cross-reactive antibody and T cell response in healthy adults. <i>Clin Immunol.</i> 2016;168:72-87. doi:10.1016/j.clim.2016.03.008                                                                                                                                                                                                                                                                                | exclude - dose-sparing but experimental vaccine                          |
| 7 Lee JH, Cho HK, Kim KH, et al. Evaluation of Waning Immunity at 6 Months after Both Trivalent and Quadrivalent Influenza Vaccination in Korean Children Aged 6-35 Months. <i>J Korean Med Sci.</i> 2019;34(46):e279. Published 2019 Dec 2. doi:10.3346/jkms.2019.34.e279                                                                                                                                                                                                                                                            | exclude - dose-sparing but experimental vaccine                          |
| 8 Treanor JJ, Taylor DN, Tussey L, et al. Safety and immunogenicity of a recombinant hemagglutinin influenza-flagellin fusion vaccine (VAX125) in healthy young adults. <i>Vaccine.</i> 2010;28(52):8268-8274. doi:10.1016/j.vaccine.2010.10.009                                                                                                                                                                                                                                                                                      | exclude - dose-sparing but experimental vaccine                          |
| 9 Vajo Z, Balaton G, Vajo P, Kalabay L, Erdman A, Torzsa P. Dose sparing and the lack of a dose-response relationship with an influenza vaccine in adult and elderly patients - a randomized, double-blind clinical trial. <i>Br J Clin Pharmacol.</i> 2017;83(9):1912-1920. doi:10.1111/bcp.13289                                                                                                                                                                                                                                    | exclude - dose-sparing but vaccine not of interest                       |
| 10 Ctri. Study of a Single Dose or Two Doses of a Quadrivalent Influenza Vaccine in Subjects Aged 6 Months or Older in India. 2015. Available from: <a href="http://www.who.int/trialsearch/Trial2.aspx?TrialID=CTRI">http://www.who.int/trialsearch/Trial2.aspx?TrialID=CTRI</a>                                                                                                                                                                                                                                                     | exclude - dose-sparing but unclear vaccine (waiting for author response) |
| 11 Euctr, F. I. Safety and Immunogenicity of the Quadrivalent Influenza Vaccine Administered via the Intramuscular Route in Children Aged 3 to 8 Years. 2011. Available from: <a href="http://www.who.int/trialsearch/Trial2.aspx?TrialID=EUCTR2011">http://www.who.int/trialsearch/Trial2.aspx?TrialID=EUCTR2011</a>                                                                                                                                                                                                                 | exclude - dose-sparing but unclear vaccine (waiting for                  |

|    |                                                                                                                                                         |                 |
|----|---------------------------------------------------------------------------------------------------------------------------------------------------------|-----------------|
| 1  |                                                                                                                                                         |                 |
| 2  |                                                                                                                                                         |                 |
| 3  |                                                                                                                                                         |                 |
| 4  |                                                                                                                                                         |                 |
| 5  |                                                                                                                                                         |                 |
| 6  |                                                                                                                                                         | author          |
| 7  |                                                                                                                                                         | response)       |
| 8  | 12                                                                                                                                                      | exclude - dose- |
| 9  | Euctr, C. Z. A randomized, double-blind, placebo-controlled, multi-                                                                                     | sparing but     |
| 10 | country and multi-center, phase IV study to demonstrate the                                                                                             | unclear vaccine |
| 11 | efficacy of GSK Biologicals' influenza vaccine (Fluarix[TM])                                                                                            | (waiting for    |
| 12 | administered intramuscularly in adults. - FluarixUS-006. 2006.                                                                                          | author          |
| 13 | Available from: <a href="http://www.who.int/trialsearch/Trial2.aspx?TrialID=EUCTR2006">http://www.who.int/trialsearch/Trial2.aspx?TrialID=EUCTR2006</a> | response)       |
| 14 |                                                                                                                                                         |                 |
| 15 |                                                                                                                                                         |                 |
| 16 |                                                                                                                                                         |                 |
| 17 |                                                                                                                                                         |                 |
| 18 |                                                                                                                                                         |                 |
| 19 |                                                                                                                                                         |                 |
| 20 |                                                                                                                                                         |                 |
| 21 |                                                                                                                                                         |                 |
| 22 |                                                                                                                                                         |                 |
| 23 |                                                                                                                                                         |                 |
| 24 |                                                                                                                                                         |                 |
| 25 |                                                                                                                                                         |                 |
| 26 |                                                                                                                                                         |                 |
| 27 |                                                                                                                                                         |                 |
| 28 |                                                                                                                                                         |                 |
| 29 |                                                                                                                                                         |                 |
| 30 |                                                                                                                                                         |                 |
| 31 |                                                                                                                                                         |                 |
| 32 |                                                                                                                                                         |                 |
| 33 |                                                                                                                                                         |                 |
| 34 |                                                                                                                                                         |                 |
| 35 |                                                                                                                                                         |                 |
| 36 |                                                                                                                                                         |                 |
| 37 |                                                                                                                                                         |                 |
| 38 |                                                                                                                                                         |                 |
| 39 |                                                                                                                                                         |                 |
| 40 |                                                                                                                                                         |                 |
| 41 |                                                                                                                                                         |                 |
| 42 |                                                                                                                                                         |                 |
| 43 |                                                                                                                                                         |                 |
| 44 |                                                                                                                                                         |                 |
| 45 |                                                                                                                                                         |                 |
| 46 |                                                                                                                                                         |                 |
| 47 |                                                                                                                                                         |                 |
| 48 |                                                                                                                                                         |                 |
| 49 |                                                                                                                                                         |                 |
| 50 |                                                                                                                                                         |                 |
| 51 |                                                                                                                                                         |                 |
| 52 |                                                                                                                                                         |                 |
| 53 |                                                                                                                                                         |                 |
| 54 |                                                                                                                                                         |                 |
| 55 |                                                                                                                                                         |                 |
| 56 |                                                                                                                                                         |                 |
| 57 |                                                                                                                                                         |                 |
| 58 |                                                                                                                                                         |                 |
| 59 |                                                                                                                                                         |                 |
| 60 |                                                                                                                                                         |                 |

## APPENDIX 6 – Study and patient data

| Author, Year [Study design]     | Study period; Setting and Country                                                                                                                  | Objective of study                                                                                                                   | Eligibility criteria                                                                                                                                                                                                                                                                                                                                                                                                                                                                                                                                                                                 | Sample size; % Female, % previously immunized | Ethnicities                                                                                                                                                                                                   |
|---------------------------------|----------------------------------------------------------------------------------------------------------------------------------------------------|--------------------------------------------------------------------------------------------------------------------------------------|------------------------------------------------------------------------------------------------------------------------------------------------------------------------------------------------------------------------------------------------------------------------------------------------------------------------------------------------------------------------------------------------------------------------------------------------------------------------------------------------------------------------------------------------------------------------------------------------------|-----------------------------------------------|---------------------------------------------------------------------------------------------------------------------------------------------------------------------------------------------------------------|
| Kramer, 2006 [RCT] <sup>1</sup> | October 2004 – November 2004; 760-bed tertiary care community teaching hospital in the USA                                                         | To compare the effectiveness of half-dose versus full dose TIV in health care workers                                                | Age 18 years or older, hospital employee, staff member, or volunteer, and signed informed consent and authorization to use and disclose protected health information for research purposes                                                                                                                                                                                                                                                                                                                                                                                                           | 444; NR, NR                                   | NR                                                                                                                                                                                                            |
| Belshe, 2007 [RCT] <sup>2</sup> | USA; NR                                                                                                                                            | To compare the immunogenicity and safety of injection of IM and ID TIV across different dose levels (3, 6, 9, and 15µg/antigen/dose) | Healthy adults 18-49 years of age                                                                                                                                                                                                                                                                                                                                                                                                                                                                                                                                                                    | 125; 71.2%, 0%                                | American Indian/Alaskan Native (0%), Asian (2.4%), Black/African American (9.6%), Hawaiian/Pacific Islander (0%), Hispanic (0%), Multi-racial (0.8%), Non-Hispanic (97.6%), Other/unknown (0%), White (87.2%) |
| Engler, 2008 [RCT] <sup>3</sup> | November 2004 – December 2004; Allergy-Immunology-Immunization Clinic, WRAMC, and Pentagon/DiLorenzo Health Clinic, Arlington, Virginia in the USA | To determine the effects of age, sex, and dose on the immunogenicity of intramuscular TIV                                            | Healthy adults aged 18-64 years. Inclusion criteria were based on the remaining CDC and/or DoD priority prior to the shortage announcement which includes all children aged 6--23 months; adults aged >65 years; persons aged 2--64 years with underlying chronic medical conditions; all women who will be pregnant during the influenza season; residents of nursing homes and long-term--care facilities; children aged 2--18 years on chronic aspirin therapy; health-care workers involved in direct patient care; and out-of-home caregivers and household contacts of children aged <6 months | 1316; 43.4%, 0%                               | African American (9%), Asian (2%), Hispanic (2%), Other/unknown (1.4%), White (85%)                                                                                                                           |
|                                 | August 2007-2008; Seattle Division of the Department of                                                                                            | To determine pre vaccination and 4- week post-vaccination changes in antibody titer, and                                             | Community-dwelling adults 65 years and older living in Puget Sound area in Washington State                                                                                                                                                                                                                                                                                                                                                                                                                                                                                                          | 129; 17.8%, 94.6%                             | African American (4.7%), Asian (1.6%), Hispanic (0.8%), Not reported                                                                                                                                          |

| Author, Year [Study design]         | Study period; Setting and Country                                                                           | Objective of study                                                                                                                                                                                                                            | Eligibility criteria                                                                                                                                                                                                                                                                             | Sample size; % Female, % previously immunized | Ethnicities                                                                                                                                                                                                                       |
|-------------------------------------|-------------------------------------------------------------------------------------------------------------|-----------------------------------------------------------------------------------------------------------------------------------------------------------------------------------------------------------------------------------------------|--------------------------------------------------------------------------------------------------------------------------------------------------------------------------------------------------------------------------------------------------------------------------------------------------|-----------------------------------------------|-----------------------------------------------------------------------------------------------------------------------------------------------------------------------------------------------------------------------------------|
| Chi, 2010 [RCT] <sup>4</sup>        | Veterans Affairs Puget Sound Health Care System in Washington State, USA.                                   | local and systemic reactions of full-dose compared to 60% dose of TIV by IM injection                                                                                                                                                         |                                                                                                                                                                                                                                                                                                  |                                               | (2.3%), Other (0.8%), White (90%)                                                                                                                                                                                                 |
| Cioppa, 2011 [RCT] <sup>5</sup>     | October 2008 – March 2009; 10 study centers in Finland and 5 centers in Belgium                             | To evaluate the safety, tolerability and immunogenicity of different vaccine formulations with different doses of MF59 adjuvant and/or a second B strain (QIV) when added to either high or low doses of a purified subunit influenza vaccine | Healthy children aged 6 to <36 months                                                                                                                                                                                                                                                            | 126; 43.5%, NR                                | Asian (1.68%), Black (6.54%), White (84.2%)                                                                                                                                                                                       |
| Skowronski, 2011 [RCT] <sup>6</sup> | September 2008 – December 2008; 5 sites in 3 Canadian provinces (British Columbia, Quebec, and Nova Scotia) | To determine whether giving 2 full doses of split TIV to previously unimmunized infants and toddlers can improve immunogenicity without increasing reactogenicity compared with 2 half-doses                                                  | Healthy children 6–23 months of age                                                                                                                                                                                                                                                              | 267; 53.2%, 0%                                | Asian (7.9%), Other (14.3%), White (77.8%)                                                                                                                                                                                        |
| Langley, 2012 [RCT] <sup>7</sup>    | November 2008 – August 2009; 17 centers in Canada                                                           | To assess the immunogenicity and safety of a preservative-free, prefilled syringe formulation of TIV provided as the full adult dose of 0.50 mL compared with the usual children's dose of 0.25 mL in young children                          | Healthy children 6–35 months at the time of vaccination                                                                                                                                                                                                                                          | 390; 47.9%, 42.6%                             | Other (13.9%), White (86.1%)                                                                                                                                                                                                      |
| Pavia-Ruz, 2015 [RCT] <sup>8</sup>  | October 2008 – March 2009; Hong Kong, Mexico, Taiwan, Thailand, and the USA                                 | To evaluate Fluarix at both the standard recommended TIV dose for young children in the US (0.25 ml) and also at double this dose (0.5 ml)                                                                                                    | Healthy children aged 6 to 35 months at the time of the first vaccination; without acute illness at the time of enrollment and who had not been vaccinated during the 2008-2009 influenza season. Administration of influenza vaccine in a previous season was not however an exclusion criteria | 3318; 51%, 30.1%                              | African heritage/African American (3.5%), American Indian or Alaskan native (0.1%), Asian-Central/South Asian heritage (0.1%), Asian-East Asian heritage (14.5%), Asian-Japanese heritage (0.1%), Asian-South East Asian heritage |

1  
2  
3  
4  
5  
6  
7  
8  
9  
10  
11  
12  
13  
14  
15  
16  
17  
18  
19  
20  
21  
22  
23  
24  
25  
26  
27  
28  
29  
30  
31  
32  
33  
34  
35  
36  
37  
38  
39  
40  
41  
42  
43  
44  
45  
46  
47

| Author, Year [Study design]     | Study period; Setting and Country                                | Objective of study                                                                                                                                                                                                                                                                                                                                                                                   | Eligibility criteria                                                                                                                                                                                                                                                                                                                                                                                                               | Sample size; % Female, % previously immunized | Ethnicities                                                                                                                                                                                     |
|---------------------------------|------------------------------------------------------------------|------------------------------------------------------------------------------------------------------------------------------------------------------------------------------------------------------------------------------------------------------------------------------------------------------------------------------------------------------------------------------------------------------|------------------------------------------------------------------------------------------------------------------------------------------------------------------------------------------------------------------------------------------------------------------------------------------------------------------------------------------------------------------------------------------------------------------------------------|-----------------------------------------------|-------------------------------------------------------------------------------------------------------------------------------------------------------------------------------------------------|
|                                 |                                                                  |                                                                                                                                                                                                                                                                                                                                                                                                      |                                                                                                                                                                                                                                                                                                                                                                                                                                    |                                               | (9.2%), Native Hawaiian or other Pacific Islander (0.2%), White - Arabic/North African heritage (0.5%), White-Caucasian/European heritage (29.9%), Hispanics and children of mixed race (42.1%) |
| Halasa, 2015 [RCT] <sup>9</sup> | 2010-2012; 6 study sites in USA                                  | To determine whether a higher dose of influenza vaccine would be safe in the 6 through 35 months age group. In addition, to determine whether immunization with 0.5 mL doses of TIV (15 µg of each HA) would improve the immunogenicity without increasing the reactogenicity of TIV when administered to children 6 through 35 months of age with and without a history of previous TIV vaccination | Healthy children 6 to 35 months of age (naïve cohort) or 12 through 35 months of age (fully primed cohort) who were available for the entire study period and whose parents or guardians provided informed consent were eligible to participate. Children who were eligible in the fully primed cohort also required a history of receiving 2 doses of 2009–2010 H1N1 influenza vaccine and 2 doses of TIV at any time in the past | 243; 52%, 13.2%                               | African (26%), Asian (1%), Multiracial (5%), other (0%); Ethnicity: Hispanic (2%), Non-Hispanic (98%), White (67%)                                                                              |
| Phung, 2016 [RCT] <sup>10</sup> | September 2010-January 2011; Finland                             | To evaluate the immunogenicity and safety following a single intramuscular dose of FLUAD or Agrippal S1 influenza vaccines in healthy children previously vaccinated                                                                                                                                                                                                                                 | Healthy children 6–35 months at the time of vaccination                                                                                                                                                                                                                                                                                                                                                                            | 197; 55.8%, 85.7%                             | NR                                                                                                                                                                                              |
| Jain, 2017 [RCT] <sup>11</sup>  | 2014-2015 influenza season; 66 study locations in USA and Mexico | To compare the safety and immunogenicity of a double-dose IIV4 manufactured by GSK Vaccines with the United States-approved standard-dose IIV4 in children 6–35 months of age                                                                                                                                                                                                                        | Healthy children aged 6-35 months regardless of influenza vaccination history, but could not have received any seasonal or pandemic influenza vaccine within 6 months before the first dose of study vaccine                                                                                                                                                                                                                       | 2424; 46.9%, 57.5%                            | African/African American (13.9%), American Indian or Alaskan Native (2.0%), Caucasian (64.3%), Other (17.9%), South East Asian (1.8%)                                                           |
| Ojeda, 2019 [RCT] <sup>12</sup> | December 2017 – January 2018; 3 study sites in Mexico            | Reported the results of an open-label, randomized phase III study designed to evaluate the immunogenicity and safety                                                                                                                                                                                                                                                                                 | Children aged 6 months to 17 years of age                                                                                                                                                                                                                                                                                                                                                                                          | 302; 46.4%, NR                                | NR                                                                                                                                                                                              |

| Author, Year [Study design]         | Study period; Setting and Country                | Objective of study                                                                                                                                          | Eligibility criteria                                                                                                                                                                                                                     | Sample size; % Female, % previously immunized | Ethnicities                                                                                                                                                                                                       |
|-------------------------------------|--------------------------------------------------|-------------------------------------------------------------------------------------------------------------------------------------------------------------|------------------------------------------------------------------------------------------------------------------------------------------------------------------------------------------------------------------------------------------|-----------------------------------------------|-------------------------------------------------------------------------------------------------------------------------------------------------------------------------------------------------------------------|
|                                     |                                                  | of this thiomersal containing MDV format of QIV compared to the licensed thiomersal-free, single-dose PFS format in children and adolescents                |                                                                                                                                                                                                                                          |                                               |                                                                                                                                                                                                                   |
| Robertson, 2019 [RCT] <sup>13</sup> | September 2016 – March 2017; 38 sites in the USA | To compare the safety and immunogenicity of full and half doses of quadrivalent, split-virion, inactivated influenza vaccine in children 6–35 months of age | Healthy children 6–35 months of age who had not been vaccinated against influenza during the current season (2016–2017). Children 6–11 months of age had to be born at full term of pregnancy (≥37 weeks) or with a birth weight ≥2.5 kg | 1950; 49.7%, 47.3%                            | Race: American Indian or Alaska Native (0.98%), Asian (0.46%), Black (19.2%), Native Hawaiian or Other Pacific Islander (0.46%), White (74.3%), Ethnicity: Hispanic or Latino (22%), not Hispanic or Latino (77%) |

**Abbreviations:** CDC- Centers for Disease Control and Prevention; DoD- Department of Defense; GSK -GlaxoSmithKline; HA- hemagglutinin; IIV4 – inactivated influenza vaccine; ID - intradermal; IM - intramuscular; MDV- multi-dose vial; PFS – pre-filled syringe; QIV-quadrivalent influenza vaccine; TIV-trivalent influenza vaccine; NR – not reported

**APPENDIX 7 – Treatment and outcome data**

| <b>Author,<br/>Year;<br/>[Study<br/>design]<br/>Population</b>                    | <b>Treatment arms</b><br>Brand name (manufacturer),<br>HA/strain [dosing (administration)]<br>Included strains                                                                                                                                                                                                                                                                                                                                        | <b>Effectiveness and Safety</b><br>Outcome (definition):<br>n/N (unless otherwise indicated)                                                                                                                                                                                                                                                                                                                                                                                                                                                                                                                                                                                                                                                                                                                                                                                                            | <b>Conclusions</b>                                                                                                                                                                                                                                                                                                                                                                                             |
|-----------------------------------------------------------------------------------|-------------------------------------------------------------------------------------------------------------------------------------------------------------------------------------------------------------------------------------------------------------------------------------------------------------------------------------------------------------------------------------------------------------------------------------------------------|---------------------------------------------------------------------------------------------------------------------------------------------------------------------------------------------------------------------------------------------------------------------------------------------------------------------------------------------------------------------------------------------------------------------------------------------------------------------------------------------------------------------------------------------------------------------------------------------------------------------------------------------------------------------------------------------------------------------------------------------------------------------------------------------------------------------------------------------------------------------------------------------------------|----------------------------------------------------------------------------------------------------------------------------------------------------------------------------------------------------------------------------------------------------------------------------------------------------------------------------------------------------------------------------------------------------------------|
| Kramer,<br>2006<br>[RCT] <sup>1</sup><br><br>Adults and<br>Seniors<br>(>18 years) | Fluzone (Aventis Pasteur),<br><b>15-µg/strain</b> [1 x 0.5mL dose (Intramuscular into the deltoid region)]<br><br><i>A/Wyoming/3/2003 (H3N2), A/New Caledonia/20/99 (H1N1), and a new B strain, B/Jiangsu/10/2003</i><br><br>Fluzone (Aventis Pasteur),<br><b>7.5-µg/strain</b> [1 x 0.25 mL dose (Intramuscular into the deltoid region)]<br><br><i>A/Wyoming/3/2003 (H3N2), A/New Caledonia/20/99 (H1N1), and a new B strain, B/Jiangsu/10/2004</i> | <b>Effectiveness</b><br><i>Lab confirmed influenza</i> (Laboratory confirmation of influenza diagnosis was sought in participants reporting a clinical diagnosis by their physicians): 1/222<br><br><i>Influenza like illness</i> (Clinical diagnosis of influenza. Participants self-reported four or more symptoms consistent with influenza-like illness (i.e., headache, extreme tiredness, dry cough, fever, muscle or body aches)): 8/222<br><br><b>Effectiveness</b><br><i>Lab confirmed influenza</i> (Laboratory confirmation of influenza diagnosis was sought in participants reporting a clinical diagnosis by their physicians): 0/222<br><br><i>Influenza like illness</i> (Clinical diagnosis of influenza. Participants self-reported four or more symptoms consistent with influenza-like illness (i.e., headache, extreme tiredness, dry cough, fever, muscle or body aches)): 15/222 | <ul style="list-style-type: none"> <li>There was no significant difference between the full-dose and half-dose groups in the diagnosis of influenza or in the proportion of participants self-reporting four or more symptoms consistent with influenza-like illness.</li> <li>No adverse events were noted by participants from either group or reported to the IRB during the course of the study</li> </ul> |
| Belshe, 2007<br>[RCT] <sup>2</sup><br><br>Adults<br>(18-49 years)                 | Fluzone (Sanofi-Pasteur),<br><b>15-µg/strain</b> [1 x 0.5mL dose (Intramuscular in the non-dominant arm)]<br><br>Fluzone (Sanofi-Pasteur),<br><b>9-µg/strain</b> [1 x 0.3mL dose (Intramuscular in the non-dominant arm)]                                                                                                                                                                                                                             | <b>Reactogenicity – injection site</b><br><i>Pain</i> <sup>1</sup> : 15/31<br><i>Redness</i> <sup>2</sup> : 8/31<br><i>Swelling</i> <sup>2</sup> : 7/31<br><br><b>Reactogenicity – systemic</b><br><i>Fever</i> <sup>3</sup> : 1/31<br><i>Headache</i> <sup>1</sup> : 15/31<br><i>Malaise</i> <sup>1</sup> : 8/31<br><i>Myalgia</i> <sup>1</sup> : 10/31<br><br><b>Reactogenicity – injection site</b><br><i>Pain</i> <sup>1</sup> : 11/31<br><i>Redness</i> <sup>2</sup> : 11/31<br><i>Swelling</i> <sup>2</sup> : 4/31<br><br><b>Reactogenicity – systemic</b><br><i>Fever</i> <sup>3</sup> : 1/31<br><i>Headache</i> <sup>1</sup> : 6/31                                                                                                                                                                                                                                                             | <ul style="list-style-type: none"> <li>Intradermal vaccine induced significantly more local inflammatory response than Intramuscular vaccine (primary comparison of this study was ID vs IM doses)</li> </ul>                                                                                                                                                                                                  |

| Author,<br>Year;<br>[Study<br>design]<br>Population                              | Treatment arms<br>Brand name (manufacturer),<br>HA/strain [dosing (administration)]<br>Included strains                                                                                             | Effectiveness and Safety<br>Outcome (definition):<br>n/N (unless otherwise indicated)                                                                                                                                                                                                                                                                                                                                                                                                                                                                                                                                      | Conclusions                                                                                                                                                                                                                                                                                                                                                                                                                                                                                                                         |
|----------------------------------------------------------------------------------|-----------------------------------------------------------------------------------------------------------------------------------------------------------------------------------------------------|----------------------------------------------------------------------------------------------------------------------------------------------------------------------------------------------------------------------------------------------------------------------------------------------------------------------------------------------------------------------------------------------------------------------------------------------------------------------------------------------------------------------------------------------------------------------------------------------------------------------------|-------------------------------------------------------------------------------------------------------------------------------------------------------------------------------------------------------------------------------------------------------------------------------------------------------------------------------------------------------------------------------------------------------------------------------------------------------------------------------------------------------------------------------------|
|                                                                                  | <p>Fluzone (Sanofi-Pasteur),<br/><b>6-µg/strain</b> [1 x 0.2mL dose (Intramuscular in the non-dominant arm)]</p>                                                                                    | <p><i>Malaise</i><sup>1</sup>: 8/31<br/><i>Myalgia</i><sup>1</sup>: 6/31</p> <p><b>Reactogenicity – injection site</b><br/><i>Pain</i><sup>1</sup>: 14/31<br/><i>Redness</i><sup>2</sup>: 9/31<br/><i>Swelling</i><sup>2</sup>: 4/31</p> <p><b>Reactogenicity – systemic</b><br/><i>Fever</i><sup>3</sup>: 0/31<br/><i>Headache</i><sup>1</sup>: 9/31<br/><i>Malaise</i><sup>1</sup>: 7/31<br/><i>Myalgia</i><sup>1</sup>: 9/31</p>                                                                                                                                                                                        |                                                                                                                                                                                                                                                                                                                                                                                                                                                                                                                                     |
|                                                                                  | <p>Fluzone (Sanofi-Pasteur),<br/><b>3-µg/strain</b> [1 x 0.1mL dose (Intramuscular in the non-dominant arm)]</p>                                                                                    | <p><b>Reactogenicity – injection site</b><br/><i>Pain</i><sup>1</sup>: 15/31<br/><i>Redness</i><sup>2</sup>: 9/31<br/><i>Swelling</i><sup>2</sup>: 7/31</p> <p><b>Reactogenicity – systemic</b><br/><i>Fever</i><sup>3</sup>: 3/31<br/><i>Headache</i><sup>1</sup>: 8/31<br/><i>Malaise</i><sup>1</sup>: 3/31<br/><i>Myalgia</i><sup>1</sup>: 7/31</p>                                                                                                                                                                                                                                                                     |                                                                                                                                                                                                                                                                                                                                                                                                                                                                                                                                     |
| <p>Engler, 2008<br/>[RCT]<sup>3</sup></p> <p><i>Adults</i><br/>(18-64 years)</p> | <p>Fluzone (Aventis Pasteur),<br/><b>15-µg/strain</b> [1 x 0.5mL dose (Intramuscular injection)]</p> <p><i>A/H1N1, A/New Caledonia/20/99; A/H3N2, A/Fujian/411/2002; B, B/Shanghai/361/2002</i></p> | <p><b>Effectiveness</b><br/><i>Influenza like illness</i> (Influenza-like illness and complications resulting in either inpatient or outpatient medical encounters were compared between dose groups (by age)): 61/632</p> <p><i>Hospitalization or Emergency visits</i>: 0.3%</p> <p><b>Reactogenicity – local/injection site</b><br/><i>Any local reactions</i> (NR): 8.9%<br/><i>Arm weakness</i> (NR): 8.3%<br/><i>Numbness or burning</i> (NR): 9.7%<br/><i>Pain</i> (NR): 5.9%<br/><i>Redness or swelling</i> (NR): 13.4%</p> <p><b>Reactogenicity – systemic</b><br/><i>Joint and/or muscle pain</i> (NR): 4.5%</p> | <ul style="list-style-type: none"> <li>▪ The relative risk of medical visits and hospitalizations for influenza-like illnesses were similar in the half- and full-dose group regardless of age, and there was no evidence of ILI symptom differences by sex or dose during the 21 days after immunizations.</li> <li>▪ Although injection site pain was greater for full vs half dose (19.9% vs 14.4%; p=.01), when analyzed for clinically significant pain levels significant dose-dependent pain differences were not</li> </ul> |



| Author, Year; [Study design] Population                          | Treatment arms<br>Brand name (manufacturer), HA/strain [dosing (administration)]<br>Included strains                                                                                                                 | Effectiveness and Safety<br>Outcome (definition):<br>n/N (unless otherwise indicated)                                                                                                                                                                                                                                                                                                                                                                                                                                                                                                                                                                                                                                                                                           | Conclusions                                                                                                                                                                                                                        |
|------------------------------------------------------------------|----------------------------------------------------------------------------------------------------------------------------------------------------------------------------------------------------------------------|---------------------------------------------------------------------------------------------------------------------------------------------------------------------------------------------------------------------------------------------------------------------------------------------------------------------------------------------------------------------------------------------------------------------------------------------------------------------------------------------------------------------------------------------------------------------------------------------------------------------------------------------------------------------------------------------------------------------------------------------------------------------------------|------------------------------------------------------------------------------------------------------------------------------------------------------------------------------------------------------------------------------------|
|                                                                  | <p>Fluzone (Aventis Pasteur),<br/><b>7.5-µg/strain</b> [1 x 0.25 mL dose (Intramuscular injection)]</p> <p><i>A/H1N1, A/New Caledonia/20/99; A/H3N2, A/Fujian/411/2002; B, B/Shanghai/361/2003</i></p>               | <p><b>Adverse events</b><br/>SAE: 2/554</p> <p><b>Effectiveness</b><br/><i>Influenza like illness</i> (Influenza-like illness and complications resulting in either inpatient or outpatient medical encounters were compared between dose groups (by age): 64/644</p> <p><i>Hospitalization or Emergency visits</i>: 0.2%</p> <p><b>Reactogenicity – local/injection site</b><br/><i>Any local reactions</i> (NR): 7.5%<br/><i>Arm weakness</i> (NR): 6.5%<br/><i>Numbness or burning</i> (NR): 7.8%<br/><i>Pain</i> (NR): 4.6%<br/><i>Redness or swelling</i> (NR): 8.6%</p> <p><b>Reactogenicity – systemic</b><br/><i>Joint and/or muscle pain</i> (NR): 2.2%</p> <p><b>Adverse events</b><br/>SAE: 1/556</p>                                                                | <p>identified.</p> <ul style="list-style-type: none"> <li>Joint and/or muscle pain were significantly different (p=.02 and p=.03, respectively) by dose.</li> <li>No other adverse event differed significantly by dose</li> </ul> |
| <p>Chi, 2010 [RCT]<sup>4</sup></p> <p>Seniors (&gt;65 years)</p> | <p>Fluzone (Sanofi Pasteur),<br/><b>15-µg/strain</b> [1 x 0.5mL dose (intramuscular in deltoid of arm)]</p> <p><i>A/Solomon Islands/3/ 2006 (A/H1N1), A/Wisconsin/67/2005 (A/H3N2), and B/Malaysia/2506/2004</i></p> | <p><b>Reactogenicity – injection site, N=64</b><br/><i>Arm motion limitation</i>: 1 (grade I)<sup>4</sup><br/><i>Itching</i>: 4 (grade I)<sup>4</sup><br/><i>Pain</i>: 7 (grade I)<sup>4</sup><br/><i>Redness or discoloration</i>: 9 (grade I)<sup>4</sup><br/><i>Swelling</i>: 13 (grade I)<sup>4</sup></p> <p><b>Reactogenicity - systemic, N=64</b><br/><i>Chills</i>: 1 (grade I)<sup>4</sup>, 1 (grade II/III)<sup>5</sup><br/><i>Fatigue</i>: 4 (grade I)<sup>4</sup>, 2 (grade II/III)<sup>5</sup><br/><i>Fever</i>: 0<br/><i>General body ache/pain</i>: 6 (grade I)<sup>4</sup>, 1 (grade II/III)<sup>5</sup><br/><i>Headache</i>: 10 (grade I)<sup>4</sup><br/><i>Nausea</i>: 3 (grade I)<sup>4</sup>, 1 (grade II/III)<sup>5</sup></p> <p><b>Adverse events</b></p> | <ul style="list-style-type: none"> <li>The two SAEs were acute coronary syndrome and appendicitis and neither were judged to be related to influenza vaccination</li> </ul>                                                        |

| Author,<br>Year;<br>[Study<br>design]<br>Population                                                     | Treatment arms<br>Brand name (manufacturer),<br>HA/strain [dosing (administration)]<br>Included strains                                                                                                                                                                                                                                                                                                                                                                                                                                                                                                                                                                                                                                                                                                           | Effectiveness and Safety<br><i>Outcome</i> (definition):<br>n/N (unless otherwise indicated)                                                                                                                                                                                                                                                                                                                                                                                                                                                                                                                                                                                                                                                                                                                                                                                              | Conclusions                                                                                                                                                                                                                                                                                                              |
|---------------------------------------------------------------------------------------------------------|-------------------------------------------------------------------------------------------------------------------------------------------------------------------------------------------------------------------------------------------------------------------------------------------------------------------------------------------------------------------------------------------------------------------------------------------------------------------------------------------------------------------------------------------------------------------------------------------------------------------------------------------------------------------------------------------------------------------------------------------------------------------------------------------------------------------|-------------------------------------------------------------------------------------------------------------------------------------------------------------------------------------------------------------------------------------------------------------------------------------------------------------------------------------------------------------------------------------------------------------------------------------------------------------------------------------------------------------------------------------------------------------------------------------------------------------------------------------------------------------------------------------------------------------------------------------------------------------------------------------------------------------------------------------------------------------------------------------------|--------------------------------------------------------------------------------------------------------------------------------------------------------------------------------------------------------------------------------------------------------------------------------------------------------------------------|
|                                                                                                         | <p>Fluzone (Sanofi Pasteur),<br/><b>9-µg/strain</b> [1 x 0.3mL dose (intramuscular in deltoid of arm)]</p> <p><i>A/Solomon Islands/3/ 2006 (A/H1N1),<br/>A/Wisconsin/67/2005 (A/H3N2), and<br/>B/Malaysia/2506/2004</i></p>                                                                                                                                                                                                                                                                                                                                                                                                                                                                                                                                                                                       | <p>SAE<sup>6</sup>: 0/64</p> <p><b>Reactogenicity – injection site, N=64</b><br/><i>Arm motion limitation</i>: 1 (grade I)<sup>4</sup><br/><i>Itching</i>: 5 (grade I)<sup>4</sup><br/><i>Pain</i>: 11 (grade I)<sup>4</sup><br/><i>Redness or discoloration</i>: 7 (grade I)<sup>4</sup><br/><i>Swelling</i>: 4 (grade I)<sup>4</sup></p> <p><b>Reactogenicity - systemic, N=64</b><br/><i>Chills</i>: 1 (grade I)<sup>4</sup>, 1 (grade II/III)<sup>5</sup><br/><i>Fatigue</i>: 6 (grade I)<sup>4</sup>, 1 (grade II/III)<sup>5</sup><br/><i>Fever</i>: 1 (grade I)<sup>4</sup><br/><i>General body ache/pain</i>: 5 (grade I)<sup>4</sup>, 2 (grade II/III)<sup>5</sup><br/><i>Headache</i>: 5 (grade I)<sup>4</sup>, 1 (grade II/III)<sup>5</sup><br/><i>Nausea</i>: 2 (grade I)<sup>4</sup>, 1 (grade II/III)<sup>5</sup></p> <p><b>Adverse events</b><br/>SAE<sup>6</sup>: 2/64</p> |                                                                                                                                                                                                                                                                                                                          |
| <p>Cioppa,<br/>2011<br/>[RCT]<sup>5</sup></p> <p><i>Infants/<br/>Toddlers<br/>(6-36<br/>months)</i></p> | <p>NR - TIV,<br/><b>7.5-µg/strain</b> [2 x 0.25mL dose (intramuscular in deltoid of arm (children 24-35 mo of age) or the anterolateral aspect of the thigh (children &lt;24 mo of age) using prefilled syringes)]</p> <p><i>A/Brisbane/59/2007 (A/H1N1)-like virus,<br/>A/Brisbane/10/2007 (A/H3N2)-like virus, and<br/>B/Florida/4/2006-like virus (of the influenza<br/>B/Yamagata lineage)</i></p> <p>Agrippal - TIV,<br/><b>15-µg/strain</b> [2 x 0.5mL dose (intramuscular in deltoid of arm (children 24-35 mo of age) or the anterolateral aspect of the thigh (children &lt;24 mo of age) using prefilled syringes)]</p> <p><i>A/Brisbane/59/2007 (A/H1N1)-like virus,<br/>A/Brisbane/10/2007 (A/H3N2)-like virus, and<br/>B/Florida/4/2006-like virus (of the influenza<br/>B/Yamagata lineage)</i></p> | <p><b>Reactogenicity</b><br/><i>Any local reaction</i><sup>7</sup>: 47%<br/><i>Any systemic reaction</i><sup>8</sup>: 68%</p> <p><b>Adverse events</b><br/>AE (solicited/spontaneously reported): 84%<br/>SAE: 0/25</p> <p><b>Reactogenicity</b><br/><i>Any local reaction</i><sup>7</sup>: 59%<br/><i>Any systemic reaction</i><sup>8</sup>: 50%</p> <p><b>Adverse events</b><br/>AE (solicited/spontaneously reported): 82%<br/>SAE: 0/22</p>                                                                                                                                                                                                                                                                                                                                                                                                                                           | <ul style="list-style-type: none"> <li>Reactogenicity of the 7.5-µg TIV/QIV formulations was slightly lower than for the corresponding 15-µg formulations.</li> <li>The majority of unsolicited AEs were mild or moderate in severity and none of the SAEs was considered to be related to the study vaccine.</li> </ul> |

| Author,<br>Year;<br>[Study<br>design]<br>Population                              | Treatment arms<br>Brand name (manufacturer),<br>HA/strain [dosing (administration)]<br>Included strains                                                                                                                                                                                                                                                                                                                                     | Effectiveness and Safety<br><i>Outcome</i> (definition):<br>n/N (unless otherwise indicated)                                                                                                                                                                                                                                   | Conclusions                                                                                                                                                                                                                                                                                                        |
|----------------------------------------------------------------------------------|---------------------------------------------------------------------------------------------------------------------------------------------------------------------------------------------------------------------------------------------------------------------------------------------------------------------------------------------------------------------------------------------------------------------------------------------|--------------------------------------------------------------------------------------------------------------------------------------------------------------------------------------------------------------------------------------------------------------------------------------------------------------------------------|--------------------------------------------------------------------------------------------------------------------------------------------------------------------------------------------------------------------------------------------------------------------------------------------------------------------|
|                                                                                  | NR - QIV,<br><b>7.5-µg/strain</b> [2 x 0.25mL dose (intramuscular in deltoid of arm (children 24-35 mo of age) or the anterolateral aspect of the thigh (children <24 mo of age) using prefilled syringes)]<br><br><i>A/Brisbane/59/2007 (A/H1N1)-like virus, A/Brisbane/10/2007 (A/H3N2)-like virus, B/Florida/4/2006-like virus (of the influenza B/Yamagata lineage), and B/Malaysia/2506/2004-like antigen virus (Victoria lineage)</i> | <b>Reactogenicity</b><br><i>Any local reaction</i> <sup>7</sup> : 25%<br><i>Any systemic reaction</i> <sup>8</sup> : 50%<br><br><b>Adverse events</b><br><i>AE (solicited/spontaneously reported)</i> : 92%<br>SAE: 1/25                                                                                                       |                                                                                                                                                                                                                                                                                                                    |
|                                                                                  | NR - QIV,<br><b>15-µg/strain</b> [2 x 0.5mL dose (intramuscular in deltoid of arm (children 24-35 mo of age) or the anterolateral aspect of the thigh (children <24 mo of age) using prefilled syringes)]<br><br><i>A/Brisbane/59/2007 (A/H1N1)-like virus, A/Brisbane/10/2007 (A/H3N2)-like virus, B/Florida/4/2006-like virus (of the influenza B/Yamagata lineage), and B/Malaysia/2506/2004-like antigen virus (Victoria lineage)</i>   | <b>Reactogenicity</b><br><i>Any local reaction</i> <sup>7</sup> : 39%<br><i>Any systemic reaction</i> <sup>8</sup> : 54%<br><br><b>Adverse events</b><br><i>AE (solicited/spontaneously reported)</i> : 71%<br>SAE: 1/28                                                                                                       |                                                                                                                                                                                                                                                                                                                    |
|                                                                                  | Vaxigrip pediatric - TIV (Sanofi Pasteur), <b>7.5-µg/strain</b> [2 x 0.25mL dose (intramuscular in deltoid of arm (children 24-35 mo of age) or the anterolateral aspect of the thigh (children <24 mo of age) using prefilled syringes)]                                                                                                                                                                                                   | <b>Reactogenicity</b><br><i>Any local reaction</i> <sup>7</sup> : 50%<br><i>Any systemic reaction</i> <sup>8</sup> : 46%<br><br><b>Adverse events</b><br><i>AE (solicited/spontaneously reported)</i> : 73%<br>SAE: 1/26                                                                                                       |                                                                                                                                                                                                                                                                                                                    |
| Skowronski, 2011 [RCT] <sup>6</sup><br><br><i>Infants/Toddlers (6-23 months)</i> | Vaxigrip (Sanofi-Pasteur), 15-µg/strain [ <b>2 x 0.5mL dose</b> (Intramuscular injection)]<br><br><i>A/Brisbane/10/07 (H3N2); A/Brisbane/59/07 (H1N1); and B/Florida/4/06 (Yamagata lineage)</i>                                                                                                                                                                                                                                            | <b>Reactogenicity – injection site</b><br><i>Induration</i> (NR): 13.7%<br><i>Redness</i> (NR): 22.6%<br><i>Swelling</i> (NR): 15.3%<br><i>Tenderness</i> (NR): 22.6%<br><br><b>Reactogenicity – systemic</b><br><i>Fever (&gt;37.5°C)</i> : 8.06%<br><i>Irritability</i> (NR): 59.7%<br><i>Decreased appetite</i> (NR): 38.7% | <ul style="list-style-type: none"> <li>▪ Local reactions generally were less common in infants than toddlers and more common with full doses versus half doses, but none of these differences were significant.</li> <li>▪ One serious adverse event was reported: a toddler in the half dose group was</li> </ul> |

| Author,<br>Year;<br>[Study<br>design]<br>Population                                                      | Treatment arms<br>Brand name (manufacturer),<br>HA/strain [dosing (administration)]<br>Included strains                                                                                                                                                                                                                                                                    | Effectiveness and Safety<br><i>Outcome</i> (definition):<br>n/N (unless otherwise indicated)                                                                                                                                                                                                                                                                                                                                                                                                                                                                                        | Conclusions                                                                                                                                                                                                                                                                                                                                                                                                                                                                                                                                                                                                                                                                                                            |
|----------------------------------------------------------------------------------------------------------|----------------------------------------------------------------------------------------------------------------------------------------------------------------------------------------------------------------------------------------------------------------------------------------------------------------------------------------------------------------------------|-------------------------------------------------------------------------------------------------------------------------------------------------------------------------------------------------------------------------------------------------------------------------------------------------------------------------------------------------------------------------------------------------------------------------------------------------------------------------------------------------------------------------------------------------------------------------------------|------------------------------------------------------------------------------------------------------------------------------------------------------------------------------------------------------------------------------------------------------------------------------------------------------------------------------------------------------------------------------------------------------------------------------------------------------------------------------------------------------------------------------------------------------------------------------------------------------------------------------------------------------------------------------------------------------------------------|
|                                                                                                          | <p>Vaxigrip (Sanofi-Pasteur),<br/>15-µg/strain [2 x 0.25mL dose (Intramuscular<br/>injection)]</p> <p><i>A/Brisbane/10/07 (H3N2); A/Brisbane/59/07 (H1N1);<br/>and B/Florida/4/06 (Yamagata lineage)</i></p>                                                                                                                                                               | <p><i>Drowsiness</i> (NR): 39.5%<br/><i>Sleep disturbance</i> (NR): 54.8%</p> <p><b>Adverse events</b><br/>SAE: NR</p> <p><b>Reactogenicity – injection site</b><br/><i>Induration</i> (NR): 6.3%<br/><i>Redness</i> (NR): 20.3%<br/><i>Swelling</i> (NR): 8.6%<br/><i>Tenderness</i> (NR): 25.8%</p> <p><b>Reactogenicity – systemic</b><br/><i>Fever (&gt;37.5°C)</i>: 11.7%<br/><i>Irritability</i> (NR): 60.2%<br/><i>Decreased appetite</i> (NR): 43%<br/><i>Drowsiness</i> (NR): 41.4%<br/><i>Sleep disturbance</i> (NR): 50%</p> <p><b>Adverse events</b><br/>SAE: 1/128</p> | <p>hospitalized with pneumonia<br/>28 days after the first<br/>vaccination. The event was<br/>deemed unlikely related to the<br/>vaccine.</p> <ul style="list-style-type: none"> <li>▪ All of the rate differences were significantly below the allowed 10% increase in reactogenicity for the full dose (p&lt; 0.001 for infant and combined analyses, p&lt;.005 for toddlers).</li> <li>▪ This randomized controlled trial in infants and toddlers shows that compared with 0.25-mL half-dosing, administration of 2 full 0.5-mL doses of trivalent inactivated influenza vaccine can increase antibody response without increasing reactogenicity in previously unimmunized infants aged 6 to 11 months.</li> </ul> |
| <p>Langley,<br/>2012<br/>[RCT]<sup>7</sup></p> <p><i>Infants/<br/>Toddlers<br/>(6-35<br/>months)</i></p> | <p>Fluviral F1 (Sanofi-Pasteur),<br/><b>7.5-µg/strain</b> [1 x 0.25 mL dose (Intramuscularly in<br/>the anterolateral part of the thigh (if the participant<br/>was less than 12 months) or in the deltoid region of<br/>the arm)]</p> <p><i>A/Brisbane/59/2007 (H1N1), A/Uruguay/716/2007<br/>(an A/Brisbane/10/2007 [H3N2]-like virus), and<br/>B/Florida/4/2006</i></p> | <p><b>Reactogenicity – injection site</b><br/><i>Pain</i> (NR): 45/164<br/><i>Redness</i> (NR): 49/164<br/><i>Swelling</i> (NR): 22/164</p> <p><b>Reactogenicity – systemic</b><br/><i>Drowsiness</i> (NR) – 44/164<br/><i>Fever</i> (NR) – 10/164<br/><i>Irritability</i> (NR) – 62/164<br/><i>Loss of appetite</i> (NR) – 37/164</p> <p><b>Adverse events</b><br/>SAE: 1/164</p>                                                                                                                                                                                                  | <ul style="list-style-type: none"> <li>▪ Fluviral F1 group had 1 case of pneumonia resolved</li> <li>▪ Fluviral F2 group had 1 case of bronchial hyper-reactivity in resolving stage</li> <li>▪ The 0.5-mL dose of the study vaccine, when administered to children aged 6–35 months, resulted in a modest but not statistically significant improvement in</li> </ul>                                                                                                                                                                                                                                                                                                                                                 |

| Author, Year; [Study design] Population                                 | Treatment arms<br>Brand name (manufacturer), HA/strain [dosing (administration)]<br>Included strains                                                                                                                                                                                                                                                | Effectiveness and Safety<br>Outcome (definition):<br>n/N (unless otherwise indicated)                                                                                                                                                                                                                                                                                                                                                                                                                                                                                                                 | Conclusions                                                                                                                                                                                               |
|-------------------------------------------------------------------------|-----------------------------------------------------------------------------------------------------------------------------------------------------------------------------------------------------------------------------------------------------------------------------------------------------------------------------------------------------|-------------------------------------------------------------------------------------------------------------------------------------------------------------------------------------------------------------------------------------------------------------------------------------------------------------------------------------------------------------------------------------------------------------------------------------------------------------------------------------------------------------------------------------------------------------------------------------------------------|-----------------------------------------------------------------------------------------------------------------------------------------------------------------------------------------------------------|
|                                                                         | <p>Fluviral F2 (Sanofi-Pasteur),<br/><b>15-µg/strain</b> [1 x 0.5mL dose (Intramuscularly in the anterolateral part of the thigh (if the subject was less than 12 months) or in the deltoid region of the arm)]</p> <p><i>A/Brisbane/59/2007 (H1N1), A/Uruguay/716/2007 (an A/Brisbane/10/2007 [H3N2]-like virus), and B/Florida/4/2006</i></p>     | <p><i>Unsolicted adverse events (NR): 108/164</i><br/><i>Medically attended events (NR): 52/164</i></p> <p><b>Reactogenicity – injection site</b><br/><i>Pain (NR): 55/167</i><br/><i>Redness (NR): 54/167</i><br/><i>Swelling (NR): 24/167</i></p> <p><b>Reactogenicity – systemic</b><br/><i>Drowsiness (NR) – 52/167</i><br/><i>Fever (NR) – 6/167</i><br/><i>Irritability (NR) – 69/167</i><br/><i>Loss of appetite (NR) – 43/167</i></p> <p><b>Adverse events</b><br/><i>SAE: 1/167</i><br/><i>Unsolicted adverse events (NR): 112/167</i><br/><i>Medically attended events (NR): 40/167</i></p> | <p>immunogenicity with clinically similar safety and reactogenicity compared with the 0.25-mL dose.</p>                                                                                                   |
|                                                                         | <p>Vaxigrip (Sanofi-Pasteur),<br/><b>7.5-µg/strain</b> [1 x 0.25 mL dose (Intramuscularly in the anterolateral part of the thigh (if the participant was less than 12 months) or in the deltoid region of the arm)]</p> <p><i>A/Brisbane/59/2007 (H1N1), A/Uruguay/716/2007 (an A/Brisbane/10/2007 [H3N2]-like virus), and B/Florida/4/2006</i></p> | <p><b>Reactogenicity – injection site</b><br/><i>Pain (NR): 17/43</i><br/><i>Redness (NR): 13/43</i><br/><i>Swelling (NR): 5/43</i></p> <p><b>Reactogenicity – systemic</b><br/><i>Drowsiness (NR) – 11/43</i><br/><i>Fever (NR) – 2/43</i><br/><i>Irritability (NR) – 15/43</i><br/><i>Loss of appetite (NR) – 9/43</i></p> <p><b>Adverse events</b><br/><i>SAE: NR/43</i><br/><i>Unsolicted adverse events (NR): 24/43</i><br/><i>Medically attended events (NR): 9/43</i></p>                                                                                                                      |                                                                                                                                                                                                           |
| <p>Pavia-Ruz, 2013 [RCT]<sup>8</sup></p> <p><i>Infants/Toddlers</i></p> | <p>Fluarix (GSK),<br/><b>15-µg/strain</b> [1 x 0.5mL dose (intramuscular injection into the right deltoid muscle or anterolateral thigh)]</p>                                                                                                                                                                                                       | <p><b>Reactogenicity – injection site</b><br/><i>Any injection site reactions<sup>9</sup>: 514/1086</i><br/><i>Pain: 406/1086</i><br/><i>Redness: 249/1086</i><br/><i>Swelling: 170/1086</i></p>                                                                                                                                                                                                                                                                                                                                                                                                      | <ul style="list-style-type: none"> <li>▪ The reactogenicity and safety profile of the study vaccine did not appear to be affected by doubling the dose.</li> <li>▪ One subject in the Flu-15µg</li> </ul> |

| Author, Year; [Study design] Population | Treatment arms<br>Brand name (manufacturer), HA/strain [dosing (administration)]<br>Included strains                                                                                                                                 | Effectiveness and Safety<br>Outcome (definition):<br>n/N (unless otherwise indicated)                                                                                                                                                                                                                                                                                                                                    | Conclusions                                                                                                                                                                                                          |
|-----------------------------------------|--------------------------------------------------------------------------------------------------------------------------------------------------------------------------------------------------------------------------------------|--------------------------------------------------------------------------------------------------------------------------------------------------------------------------------------------------------------------------------------------------------------------------------------------------------------------------------------------------------------------------------------------------------------------------|----------------------------------------------------------------------------------------------------------------------------------------------------------------------------------------------------------------------|
| (6-35 months)                           | A/Brisbane/59/2007 (H1N1), A/Uruguay/716/2007 (H3N2) and B/Brisbane/3/2007                                                                                                                                                           | <b>Reactogenicity – systemic</b><br>Any general reactions <sup>10</sup> : 575/1086<br>Drowsiness: 317/1086<br>Fever: 69/1086<br>Irritability: 387/1086<br>Loss of appetite: 273/1086<br><br><b>Adverse events</b><br>Any AE: 729/1086<br>SAE: 29/1086                                                                                                                                                                    | group had two SAEs, (apnea and cyanosis) which were considered by the investigator to be possibly related to vaccination. The participant was hospitalized and the events resolved on the same day as they occurred. |
|                                         | Fluarix (GSK),<br><b>7.5-µg/strain</b> [1 x 0.25 mL dose (intramuscular injection into the right deltoid muscle or anterolateral thigh)]<br><br>A/Brisbane/59/2007 (H1N1), A/Uruguay/716/2007 (H3N2) and B/Brisbane/3/2007           | <b>Reactogenicity – injection site</b><br>Any injection site reactions <sup>9</sup> : 492/1081<br>Pain: 403/1081<br>Redness: 259/1081<br>Swelling: 152/1081<br><br><b>Reactogenicity – systemic</b><br>Any general reactions <sup>10</sup> : 598/1081<br>Drowsiness: 293/1081<br>Fever: 67/1081<br>Irritability: 386/1081<br>Loss of appetite: 281/1081<br><br><b>Adverse events</b><br>Any AE: 724/1081<br>SAE: 35/1081 |                                                                                                                                                                                                                      |
|                                         | Fluzone (Sanofi-Pasteur),<br><b>7.5-µg/strain</b> [1 x 0.25 mL dose (intramuscular injection into the right deltoid muscle or anterolateral thigh)]<br><br>A/Brisbane/59/2007 (H1N1), A/Uruguay/716/2007 (H3N2) and B/Florida/4/2006 | <b>Reactogenicity – injection site</b><br>Any injection site reactions <sup>9</sup> : 467/1090<br><br>Pain: 363/1090<br>Redness: 253/1090<br>Swelling: 129/1090<br><br><b>Reactogenicity – systemic</b><br>Any general reactions <sup>10</sup> : 592/1090<br>Drowsiness: 298/1090<br>Irritability: 375/1090<br>Fever: 72/1090<br>Loss of appetite: 270/1090                                                              |                                                                                                                                                                                                                      |

| Author, Year; [Study design] Population                               | Treatment arms<br>Brand name (manufacturer), HA/strain [dosing (administration)]<br>Included strains                                                                                                  | Effectiveness and Safety<br>Outcome (definition):<br>n/N (unless otherwise indicated)                                                                                                                                                                                   | Conclusions                                                                                                                                                                                                                                                                                                                                                                                                                                                                                                                                                                                                                                                                                                                                                                 |
|-----------------------------------------------------------------------|-------------------------------------------------------------------------------------------------------------------------------------------------------------------------------------------------------|-------------------------------------------------------------------------------------------------------------------------------------------------------------------------------------------------------------------------------------------------------------------------|-----------------------------------------------------------------------------------------------------------------------------------------------------------------------------------------------------------------------------------------------------------------------------------------------------------------------------------------------------------------------------------------------------------------------------------------------------------------------------------------------------------------------------------------------------------------------------------------------------------------------------------------------------------------------------------------------------------------------------------------------------------------------------|
|                                                                       |                                                                                                                                                                                                       | <b>Adverse events</b><br>Any AE: 722/1090<br>SAE: 31/1090                                                                                                                                                                                                               |                                                                                                                                                                                                                                                                                                                                                                                                                                                                                                                                                                                                                                                                                                                                                                             |
| Halasa, 2015 [RCT] <sup>9</sup><br><br>Infants/Toddlers (6-35 months) | Fluzone (Sanofi Pasteur),<br><b>7.5-µg/strain</b> [1 x 0.25 mL dose (intramuscular)]<br><br>A/California/7/09 (H1N1)-like virus, A/Perth/16/2009 (H3N2)-like virus, and B/Brisbane/60/2008-like virus | <b>Reactogenicity</b><br>Redness at injection site: 8/48<br>Fever (temperature >39°C after the first dose): 7/80                                                                                                                                                        | <ul style="list-style-type: none"> <li>No significant differences between the full-dose or half-dose groups for either the fully primed or naive cohorts for systemic reactions or local reactions when both seasons were combined.</li> <li>The only significant difference in the 2011–2012 season was that 8 of 48 (16.7%) participants in the half-dose group compared with 32 of 96 (33.3%) in the full-dose group had increased redness at the injection site (P &lt; .05).</li> <li>No significant differences between the groups in unsolicited AEs, serious adverse events (SAEs), or onset of chronic medical conditions between the dose groups in either the naive or fully primed cohorts, and none of the SAEs were deemed related to the vaccine.</li> </ul> |
|                                                                       | Fluzone (Sanofi Pasteur),<br><b>15-µg/strain</b> [1 x 0.5 mL dose (intramuscular)]<br><br>A/California/7/09 (H1N1)-like virus, A/Perth/16/2009 (H3N2)-like virus, and B/Brisbane/60/2008-like virus   | <b>Reactogenicity</b><br>Redness at injection site: 32/96<br>Fever (temperature >39°C after the first dose): 19/161                                                                                                                                                     |                                                                                                                                                                                                                                                                                                                                                                                                                                                                                                                                                                                                                                                                                                                                                                             |
| Phung, 2016 [RCT] <sup>10</sup><br><br>Infants/Toddlers (6-35 months) | FLUAD (NR),<br><b>NR [1 x 0.5mL dose]</b> (Intramuscular injection)<br><br>A/H1N1, A/H3N2, Strain B                                                                                                   | <b>Reactogenicity</b><br>Any local reaction <sup>11</sup> : 45/61<br>Any systemic reaction <sup>12</sup> : 36/61<br><br><b>Adverse events</b><br>SAE (based on MedDRA v 17.1 definition): 2/61<br><br><b>Reactogenicity</b><br>Any local reaction <sup>11</sup> : 63/75 |                                                                                                                                                                                                                                                                                                                                                                                                                                                                                                                                                                                                                                                                                                                                                                             |

| Author, Year; [Study design] Population                              | Treatment arms<br>Brand name (manufacturer), HA/strain [dosing (administration)]<br>Included strains                                                                                                                                           | Effectiveness and Safety<br>Outcome (definition):<br>n/N (unless otherwise indicated)                                                                                                                                                                                                                                                                                                                                                                            | Conclusions                                                                                                                                                                                                                                                                                                                                                                                |
|----------------------------------------------------------------------|------------------------------------------------------------------------------------------------------------------------------------------------------------------------------------------------------------------------------------------------|------------------------------------------------------------------------------------------------------------------------------------------------------------------------------------------------------------------------------------------------------------------------------------------------------------------------------------------------------------------------------------------------------------------------------------------------------------------|--------------------------------------------------------------------------------------------------------------------------------------------------------------------------------------------------------------------------------------------------------------------------------------------------------------------------------------------------------------------------------------------|
|                                                                      | A/H1N1, A/H3N2, Strain B                                                                                                                                                                                                                       | Any systemic reaction <sup>12</sup> : 42/75<br><br><b>Adverse events</b><br>SAE (based on MedDRA v 17.1 definition): 2/75                                                                                                                                                                                                                                                                                                                                        |                                                                                                                                                                                                                                                                                                                                                                                            |
|                                                                      | Agrippal S1 (NR),<br>NR [1 x 0.5mL dose (Intramuscular injection)]<br><br>A/H1N1, A/H3N2, Strain B                                                                                                                                             | <b>Reactogenicity</b><br>Any local reaction <sup>11</sup> : 42/51<br>Any systemic reaction <sup>12</sup> : 24/51<br><br><b>Adverse events</b><br>SAE (based on MedDRA v 17.1 definition): 0/51                                                                                                                                                                                                                                                                   |                                                                                                                                                                                                                                                                                                                                                                                            |
|                                                                      | Agrippal S1 (NR),<br>NR [1 x 0.25mL dose (Intramuscular injection)]<br>A/H1N1, A/H3N2, Strain B                                                                                                                                                | <b>Reactogenicity</b><br>Any local reaction <sup>11</sup> : 6/10<br>Any systemic reaction <sup>12</sup> : 5/10<br><br><b>Adverse events</b><br>SAE (based on MedDRA v 17.1): 0/10                                                                                                                                                                                                                                                                                |                                                                                                                                                                                                                                                                                                                                                                                            |
| Jain, 2017 [RCT] <sup>11</sup><br><br>Infants/Toddlers (6-35 months) | Flulaval Quadrivalent (GSK),<br><b>15-µg/strain</b> [1 x 0.5mL dose (intramuscular in deltoid region)]<br><br>A/California/7/2009 (A/H1N1), A/Texas/50/2012 (A/H3N2), B/Brisbane/60/2008 (B/Victoria), and B/Massachusetts/2/2012 (B/Yamagata) | <b>Reactogenicity – injection site (within 7 days)</b><br>Pain: 44.0%<br>Redness: 1.4%<br>Swelling: 1.0%<br><br><b>Reactogenicity – systemic (within 7 days)</b><br>Drowsiness: 40.6%<br>Fever (>=38.0C): 7.9%<br>Irritability/fussiness: 54.4%<br>Loss of appetite: 33.7%<br><br><b>Adverse events</b><br>Any AE: 45.5%<br>Vaccine-related AE: 5.9%<br>Any SAE <sup>13</sup> : 1.8%<br>Febrile seizures: 0.4%<br>Medically attended event <sup>14</sup> : 60.2% | <ul style="list-style-type: none"> <li>▪ None of the febrile seizures or the SAEs were considered by the investigator to be related to vaccination</li> <li>▪ Double-dose IIV4 may improve protection against influenza B in some young children and simplifies annual influenza vaccination by allowing the same vaccine dose to be used for all eligible children and adults.</li> </ul> |
|                                                                      | Fluzone Quadrivalent (Sanofi Pasteur),<br><b>7.5-µg/strain</b> [1 x 0.25 mL dose (intramuscular in deltoid region)]                                                                                                                            | <b>Reactogenicity – injection site (within 7 days)</b><br>Pain: 40.1%<br>Redness: 1.4%<br>Swelling: 0.4%<br><br><b>Reactogenicity – systemic (within 7 days)</b>                                                                                                                                                                                                                                                                                                 |                                                                                                                                                                                                                                                                                                                                                                                            |



| Author, Year; [Study design] Population                                                            | Treatment arms<br>Brand name (manufacturer), HA/strain [dosing (administration)]<br>Included strains                                                                                                                                                                                                                                                                                                                                                                                                                                                                                                                                                                                                | Effectiveness and Safety<br>Outcome (definition):<br>n/N (unless otherwise indicated)                                                                                                                                                                                                                                                                                                                                                                                                                                                                                                                                                                                                                                                                                                                                                                                                                                            | Conclusions                                                                                                                                                                                                                                                                                                                                                                                                                                                                                                                                                                                                                                                                                                                                                        |
|----------------------------------------------------------------------------------------------------|-----------------------------------------------------------------------------------------------------------------------------------------------------------------------------------------------------------------------------------------------------------------------------------------------------------------------------------------------------------------------------------------------------------------------------------------------------------------------------------------------------------------------------------------------------------------------------------------------------------------------------------------------------------------------------------------------------|----------------------------------------------------------------------------------------------------------------------------------------------------------------------------------------------------------------------------------------------------------------------------------------------------------------------------------------------------------------------------------------------------------------------------------------------------------------------------------------------------------------------------------------------------------------------------------------------------------------------------------------------------------------------------------------------------------------------------------------------------------------------------------------------------------------------------------------------------------------------------------------------------------------------------------|--------------------------------------------------------------------------------------------------------------------------------------------------------------------------------------------------------------------------------------------------------------------------------------------------------------------------------------------------------------------------------------------------------------------------------------------------------------------------------------------------------------------------------------------------------------------------------------------------------------------------------------------------------------------------------------------------------------------------------------------------------------------|
|                                                                                                    | <p>A/California/7/2009 (A/H1N1), A/Texas/50/2012 (A/H3N2), B/Brisbane/60/2008 (B/Victoria), and B/Massachusetts/2/2012 (B/Yamagata)</p>                                                                                                                                                                                                                                                                                                                                                                                                                                                                                                                                                             | <p>Drowsiness: 40.9%<br/>Fever (<math>\geq 38.0^{\circ}\text{C}</math>): 7.5%<br/>Irritability/fussiness: 50.5%<br/>Loss of appetite: 33.4%</p> <p><b>Adverse events</b><br/>Any AE: 44.1%<br/>Vaccine-related AE: 5.8%<br/>Any SAE<sup>13</sup>: 1.7%<br/>Febrile seizures: 0.3%<br/>Medically attended event<sup>14</sup>: 59.1%</p>                                                                                                                                                                                                                                                                                                                                                                                                                                                                                                                                                                                           |                                                                                                                                                                                                                                                                                                                                                                                                                                                                                                                                                                                                                                                                                                                                                                    |
| <p>Ojeda. 2019 [RCT]<sup>12</sup><br/><br/>Infants/Toddlers and Children (6 months – 17 years)</p> | <p>Vaxigrip Tetra (Sanofi Pasteur) – <b>PFS</b>, 15-<math>\mu\text{g}</math>/strain [1 x 0.5mL dose (intramuscular or deep subcutaneous injection)]</p> <p>A/Michigan/45/2015 (H1N1)pdm09-like virus, A/Hong Kong/4801/2014 (H3N2)-like virus, /Brisbane/60/2008-like virus (B/Victoria lineage), and B/Phuket/3073/2013 (B/Yamagata lineage)</p> <p>Vaxigrip Tetra (Sanofi Pasteur) - <b>MDV</b>, 15-<math>\mu\text{g}</math>/strain [1 x 0.5mL dose (intramuscular or deep subcutaneous injection)]</p> <p>A/Michigan/45/2015 (H1N1)pdm09-like virus, A/Hong Kong/4801/2014 (H3N2)-like virus, /Brisbane/60/2008-like virus (B/Victoria lineage), and B/Phuket/3073/2013 (B/Yamagata lineage)</p> | <p><b>Reactogenicity, N=142</b><br/>Any injection-site reaction (solicited within 7 days): 26 (6-35mo), 16 (3-8yr), 42 (9-7yr)<br/>Any systemic reaction (solicited within 7 days): 25 (6-35mo), 15 (3-8yr), 35 (9-7yr)</p> <p><b>Adverse events, N=147</b><br/>AE (immediate unsolicited): 1 (9-17 years)<br/>Non-serious AE: 25 (6-35mo), 9 (3-8yr), 8 (9-7yr)<br/>Vaccine-related non-serious AE: 1 (9-17 years)<br/>AE leading to study discontinuation: 0<br/>SAE: 0</p> <p><b>Reactogenicity, N=139</b><br/>Any injection-site reaction(solicited within 7 days): 27 (6-35mo), 16 (3-8yr), 26 (9-7yr)<br/>Any systemic reaction(solicited within 7 days): 33 (6-35mo), 13 (3-8yr), 30 (9-7yr)</p> <p><b>Adverse events, N=150</b><br/>AE (immediate unsolicited): 0<br/>Non-serious AE: 31 (6-35mo), 14 (3-8yr), 5 (9-7yr)<br/>Vaccine-related non-serious AE: 0<br/>AE leading to study discontinuation: 0<br/>SAE: 0</p> | <ul style="list-style-type: none"> <li>▪ Solicited reactions were mostly grade 1 (mild) in intensity and resolved within 3 days.</li> <li>▪ Solicited systemic reactions were reported in more infants aged 6 – 35 months in the MDV group than in the PFS group however, because the 95% CIs were overlapping, this was not thought clinically significant.</li> <li>▪ None of these unsolicited AEs were considered related to a study vaccine by the investigators.</li> <li>▪ There were no differences in reactogenicity or safety between the two vaccine formats. These results showed that the MDV format of QIV was as safe and immunogenic as the PFS format in infants, children, and adolescents. These findings support the use of MDV QIV</li> </ul> |

| Author, Year; [Study design] Population                                   | Treatment arms<br>Brand name (manufacturer), HA/strain [dosing (administration)]<br>Included strains                                                                                                                                                                                                                                                                                                                                                                                                                                                                                                                           | Effectiveness and Safety<br>Outcome (definition):<br>n/N (unless otherwise indicated)                                                                                                                                                                                                                                                                                                                                                                                                                                                                                                                                                                                                                                                                             | Conclusions                                                                                                                                                                                                                                                                                                                                                                                                                                                                                                                                                                                                                                                                                                                                      |
|---------------------------------------------------------------------------|--------------------------------------------------------------------------------------------------------------------------------------------------------------------------------------------------------------------------------------------------------------------------------------------------------------------------------------------------------------------------------------------------------------------------------------------------------------------------------------------------------------------------------------------------------------------------------------------------------------------------------|-------------------------------------------------------------------------------------------------------------------------------------------------------------------------------------------------------------------------------------------------------------------------------------------------------------------------------------------------------------------------------------------------------------------------------------------------------------------------------------------------------------------------------------------------------------------------------------------------------------------------------------------------------------------------------------------------------------------------------------------------------------------|--------------------------------------------------------------------------------------------------------------------------------------------------------------------------------------------------------------------------------------------------------------------------------------------------------------------------------------------------------------------------------------------------------------------------------------------------------------------------------------------------------------------------------------------------------------------------------------------------------------------------------------------------------------------------------------------------------------------------------------------------|
|                                                                           |                                                                                                                                                                                                                                                                                                                                                                                                                                                                                                                                                                                                                                |                                                                                                                                                                                                                                                                                                                                                                                                                                                                                                                                                                                                                                                                                                                                                                   | as a resource-saving alternative for seasonal influenza vaccination.                                                                                                                                                                                                                                                                                                                                                                                                                                                                                                                                                                                                                                                                             |
| Robertson, 2019 [RCT] <sup>13</sup><br><br>Infants/Toddlers (6-35 months) | <p>Fluzone Quadrivalent (Sanofi Pasteur), <b>15-µg/strain</b> [1 x 0.5mL dose (intramuscular single-dose syringes in deltoid of arm)]</p> <p><i>A/California/07/2009 X-179A (H1N1), A/Hong Kong/4801/2014 X-263B (H3N2), B/Brisbane/60/2008 (Victoria lineage), B/Phuket/3073/2013 (Yamagata lineage)</i></p> <p>Fluzone Quadrivalent (Sanofi Pasteur), <b>7.5-µg/strain</b> [1 x 0.25 mL dose (intramuscular single-dose syringes in deltoid of arm)]</p> <p><i>A/California/07/2009 X-179A (H1N1), A/Hong Kong/4801/2014 X-263B (H3N2), B/Brisbane/60/2008 (Victoria lineage), B/Phuket/3073/2013 (Yamagata lineage)</i></p> | <p><b>Reactogenicity</b><br/><i>Any injection-site reaction</i><sup>15</sup>: 533/939<br/><i>Any systemic reaction</i><sup>16</sup>: 561/941</p> <p><b>Adverse events</b><br/><i>Vaccine-related AE</i> (immediate within 30 mins): 0/992<br/><i>Vaccine-related AE</i> (within 28 days): 30/992<br/><i>AE leading to study discontinuation</i>: 0/992<br/>SAE: 5/992</p> <p><b>Reactogenicity</b><br/><i>Any injection-site reaction</i><sup>15</sup>: 480/909<br/><i>Any systemic reaction</i><sup>16</sup>: 533/909</p> <p><b>Adverse events</b><br/><i>Vaccine-related AE</i> (unsolicited within 30 mins): 1/949<br/><i>Vaccine-related AE</i> (unsolicited within 28 days): 29/949<br/><i>AE leading to study discontinuation</i>: 3/949<br/>SAE: 5/949</p> | <ul style="list-style-type: none"> <li>▪ Proportions of participants reporting solicited injection-site reactions, solicited systemic reactions, vaccine-related unsolicited AEs were similar for the full- and half-dose groups</li> <li>▪ None of the AEs leading to study discontinuation or the SAEs were considered related to vaccination</li> <li>▪ A single AE of special interest (chronic urticaria first appearing 3 days post-vaccination and continuing for &gt;6 weeks) was considered by the investigator to be related to vaccination</li> <li>▪ In children 6–35 months of age, a full dose of IIV4 was immunogenic and had a safety profile comparable to that of a half dose with no new safety concerns observed.</li> </ul> |

**Abbreviations:** AE – adverse events, ID – intradermal; ILI – influenza-like illness; IM – intramuscular; MDV – multi-dose vials, n – number of people with condition, N – sample size of treatment arm, NR – not reported, PFS – prefilled syringe, SAE – serious adverse events

<sup>1</sup> Defined as mild (easily tolerated), moderate (interferes with normal behaviour or activities), severe (incapacitating, unable to perform usual activities, may require medical attention)

<sup>2</sup> Present at or near the approximate point of needle entry; small <2.5cm, medium >2.5cm to <5cm, large >5cm

<sup>3</sup> Oral temperature >37.5 C; mild >37.5 to 38 C, moderate >38.1 to 39 C, severe >39.1 C

<sup>4</sup> Grade I reactions defined as “present but easily tolerated” for fatigue, muscle ache, headache, itching or pain at injection site; oral temperature >=38 and <39 degrees Celsius; some limitation to arm motion due to stiffness or discomfort but easily tolerated; redness or swelling >= 8cm

1  
2  
3 <sup>5</sup> Grade II/III reactions defined as “interferes with normal activity” to “severe and incapacitating” for fatigue, muscle ache, headache, itching or pain at  
4 injection site; oral temperature  $\geq 39$  degrees Celsius; limitation to arm motion due to stiffness or discomfort that interferes with normal activity; redness  
5 or swelling  $> 8$ cm

6 <sup>6</sup> Defined as serious adverse events resulting in hospitalization

7 <sup>7</sup> Solicited local reactions included ecchymosis, erythema, induration, swelling, and tenderness at injection site

8 <sup>8</sup> Solicited systemic reactions included sleepiness, diarrhea, vomiting, irritability, change in eating habits, shivering, and unusual crying

9 <sup>9</sup> Included injection site reactions of Grade 1, “minor reaction to touch”, Grade 2, “cries/protests on touch”, and Grade 3, “cries when limb  
10 moved/spontaneously painful”

11 <sup>10</sup> Included systemic reactions of Grade 1, “no effect on normal activity”, Grade 2, “interferes with normal activity”, and Grade 3, “prevents normal activity”

12 <sup>11</sup> Included injection site ecchymosis, injection site erythema, injection site induration, injection site swelling, tenderness, injection site pain

13 <sup>12</sup> Included change in eating habits, sleepiness, unusual crying, irritability, vomiting, diarrhea, chills/shivering, malaise, myalgia, arthralgia, headache,  
14 fatigue, fever ( $>37.3$  C)

15 <sup>13</sup> Defined serious adverse events as any untoward medical occurrence that results in death, is life-threatening, requires/prolongs hospitalization, or  
16 results in disability or incapacity during entire study period

17 <sup>14</sup> Defined as hospitalization, emergency room visit, and/or medical practitioner visit during entire study period

18 <sup>15</sup> Included tenderness, redness and/or swelling solicited within 7 days

19 <sup>16</sup> Included fever, vomiting, abnormal crying, drowsiness, loss of appetite, and/or irritability solicited within 7 days  
20  
21  
22  
23  
24  
25  
26  
27  
28  
29  
30  
31  
32  
33  
34  
35  
36  
37  
38  
39  
40  
41  
42  
43  
44  
45  
46  
47

## PRISMA ScR checklist

| SECTION                                  | ITEM | PRISMA-ScR CHECKLIST ITEM                                                                                                                                                                                                                                                                                  | REPORTED ON PAGE #                        |
|------------------------------------------|------|------------------------------------------------------------------------------------------------------------------------------------------------------------------------------------------------------------------------------------------------------------------------------------------------------------|-------------------------------------------|
| <b>TITLE</b>                             |      |                                                                                                                                                                                                                                                                                                            |                                           |
| <b>Title</b>                             | 1    | Identify the report as a scoping review.                                                                                                                                                                                                                                                                   | <a href="#">Click here to enter text.</a> |
| <b>ABSTRACT</b>                          |      |                                                                                                                                                                                                                                                                                                            |                                           |
| <b>Structured summary</b>                | 2    | Provide a structured summary that includes (as applicable): background, objectives, eligibility criteria, sources of evidence, charting methods, results, and conclusions that relate to the review questions and objectives.                                                                              | <a href="#">Click here to enter text.</a> |
| <b>INTRODUCTION</b>                      |      |                                                                                                                                                                                                                                                                                                            |                                           |
| <b>Rationale</b>                         | 3    | Describe the rationale for the review in the context of what is already known. Explain why the review questions/objectives lend themselves to a scoping review approach.                                                                                                                                   | <a href="#">Click here to enter text.</a> |
| <b>Objectives</b>                        | 4    | Provide an explicit statement of the questions and objectives being addressed with reference to their key elements (e.g., population or participants, concepts, and context) or other relevant key elements used to conceptualize the review questions and/or objectives.                                  | <a href="#">Click here to enter text.</a> |
| <b>METHODS</b>                           |      |                                                                                                                                                                                                                                                                                                            |                                           |
| <b>Protocol and registration</b>         | 5    | Indicate whether a review protocol exists; state if and where it can be accessed (e.g., a Web address); and if available, provide registration information, including the registration number.                                                                                                             | <a href="#">Click here to enter text.</a> |
| <b>Eligibility criteria</b>              | 6    | Specify characteristics of the sources of evidence used as eligibility criteria (e.g., years considered, language, and publication status), and provide a rationale.                                                                                                                                       | <a href="#">Click here to enter text.</a> |
| <b>Information sources*</b>              | 7    | Describe all information sources in the search (e.g., databases with dates of coverage and contact with authors to identify additional sources), as well as the date the most recent search was executed.                                                                                                  | <a href="#">Click here to enter text.</a> |
| <b>Search</b>                            | 8    | Present the full electronic search strategy for at least 1 database, including any limits used, such that it could be repeated.                                                                                                                                                                            | <a href="#">Click here to enter text.</a> |
| <b>Selection of sources of evidence†</b> | 9    | State the process for selecting sources of evidence (i.e., screening and eligibility) included in the scoping review.                                                                                                                                                                                      | <a href="#">Click here to enter text.</a> |
| <b>Data charting process‡</b>            | 10   | Describe the methods of charting data from the included sources of evidence (e.g., calibrated forms or forms that have been tested by the team before their use, and whether data charting was done independently or in duplicate) and any processes for obtaining and confirming data from investigators. | <a href="#">Click here to enter text.</a> |

|                                                              |    |                                                                                                                                                                                                       |                           |
|--------------------------------------------------------------|----|-------------------------------------------------------------------------------------------------------------------------------------------------------------------------------------------------------|---------------------------|
| <b>Data items</b>                                            | 11 | List and define all variables for which data were sought and any assumptions and simplifications made.                                                                                                | Click here to enter text. |
| <b>Critical appraisal of individual sources of evidence§</b> | 12 | If done, provide a rationale for conducting a critical appraisal of included sources of evidence; describe the methods used and how this information was used in any data synthesis (if appropriate). | Click here to enter text. |
| <b>Synthesis of results</b>                                  | 13 | Describe the methods of handling and summarizing the data that were charted.                                                                                                                          | Click here to enter text. |
| <b>RESULTS</b>                                               |    |                                                                                                                                                                                                       |                           |
| <b>Selection of sources of evidence</b>                      | 14 | Give numbers of sources of evidence screened, assessed for eligibility, and included in the review, with reasons for exclusions at each stage, ideally using a flow diagram.                          | Click here to enter text. |
| <b>Characteristics of sources of evidence</b>                | 15 | For each source of evidence, present characteristics for which data were charted and provide the citations.                                                                                           | Click here to enter text. |
| <b>Critical appraisal within sources of evidence</b>         | 16 | If done, present data on critical appraisal of included sources of evidence (see item 12).                                                                                                            | Click here to enter text. |
| <b>Results of individual sources of evidence</b>             | 17 | For each included source of evidence, present the relevant data that were charted that relate to the review questions and objectives.                                                                 | Click here to enter text. |
| <b>Synthesis of results</b>                                  | 18 | Summarize and/or present the charting results as they relate to the review questions and objectives.                                                                                                  | Click here to enter text. |
| <b>DISCUSSION</b>                                            |    |                                                                                                                                                                                                       |                           |
| <b>Summary of evidence</b>                                   | 19 | Summarize the main results (including an overview of concepts, themes, and types of evidence available), link to the review questions and objectives, and consider the relevance to key groups.       | Click here to enter text. |
| <b>Limitations</b>                                           | 20 | Discuss the limitations of the scoping review process.                                                                                                                                                | Click here to enter text. |
| <b>Conclusions</b>                                           | 21 | Provide a general interpretation of the results with respect to the review questions and objectives, as well as potential implications and/or next steps.                                             |                           |
| <b>FUNDING</b>                                               |    |                                                                                                                                                                                                       |                           |
| <b>Funding</b>                                               | 22 | Describe sources of funding for the included sources of evidence, as well as sources of funding for the scoping review. Describe the role of the funders of the scoping review.                       | Click here to enter text. |

‡ JBI = Joanna Briggs Institute; PRISMA-ScR = Preferred Reporting Items for Systematic reviews and Meta-Analyses extension for Scoping Reviews.

\* Where sources of evidence (see second footnote) are compiled from, such as bibliographic databases, social media platforms, and Web sites.

† A more inclusive/heterogeneous term used to account for the different types of evidence or data sources (e.g., quantitative and/or qualitative research, expert opinion, and policy documents) that may be eligible in a scoping review as opposed to only studies. This is not to be confused with information sources (see first footnote).

‡ The frameworks by Arksey and O'Malley (6) and Levac and colleagues (7) and the JBI guidance (4, 5) refer to the process of data extraction in a scoping review as data charting.

§ The process of systematically examining research evidence to assess its validity, results, and relevance before using it to inform a decision. This term is used for items 12 and 19 instead of "risk of bias" (which is more applicable to systematic

1  
2  
3 reviews of interventions) to include and acknowledge the various sources of evidence that may be used in a scoping review  
4 (e.g., quantitative and/or qualitative research, expert opinion, and policy document).  
5  
6  
7  
8  
9  
10  
11  
12  
13  
14  
15  
16  
17  
18  
19  
20  
21  
22  
23  
24  
25  
26  
27  
28  
29  
30  
31  
32  
33  
34  
35  
36  
37  
38  
39  
40  
41  
42  
43  
44  
45  
46  
47  
48  
49  
50  
51  
52  
53  
54  
55  
56  
57  
58  
59  
60

For peer review only

# BMJ Open

## Safety and effectiveness of dose-sparing strategies for intramuscular seasonal influenza vaccine: A rapid scoping review

|                                 |                                                                                                                                                                                                                                                                                                                                                                                                                                                                                                                                                                                                                  |
|---------------------------------|------------------------------------------------------------------------------------------------------------------------------------------------------------------------------------------------------------------------------------------------------------------------------------------------------------------------------------------------------------------------------------------------------------------------------------------------------------------------------------------------------------------------------------------------------------------------------------------------------------------|
| Journal:                        | <i>BMJ Open</i>                                                                                                                                                                                                                                                                                                                                                                                                                                                                                                                                                                                                  |
| Manuscript ID                   | bmjopen-2021-050596.R1                                                                                                                                                                                                                                                                                                                                                                                                                                                                                                                                                                                           |
| Article Type:                   | Original research                                                                                                                                                                                                                                                                                                                                                                                                                                                                                                                                                                                                |
| Date Submitted by the Author:   | 03-Aug-2021                                                                                                                                                                                                                                                                                                                                                                                                                                                                                                                                                                                                      |
| Complete List of Authors:       | Lunny, Carole; UBC, DAPT; St Michael's Hospital Li Ka Shing Knowledge Institute, Knowledge Translation Program<br>Antony, Jesmin; St Michael's Hospital Li Ka Shing Knowledge Institute<br>Rios, Patricia; Independent Researcher<br>Williams, Chantal ; Independent Researcher<br>Ramkissoon, Naveeta; St Michael's Hospital Li Ka Shing Knowledge Institute, Knowledge Translation<br>Straus, Sharon; St Michael's Hospital Li Ka Shing Knowledge Institute; University of Toronto, Geriatric Medicine<br>Tricco, Andrea; St Michael's Hospital Li Ka Shing Knowledge Institute, Knowledge Translation Program |
| <b>Primary Subject Heading</b>: | Immunology (including allergy)                                                                                                                                                                                                                                                                                                                                                                                                                                                                                                                                                                                   |
| Secondary Subject Heading:      | Immunology (including allergy)                                                                                                                                                                                                                                                                                                                                                                                                                                                                                                                                                                                   |
| Keywords:                       | VIROLOGY, IMMUNOLOGY, PUBLIC HEALTH                                                                                                                                                                                                                                                                                                                                                                                                                                                                                                                                                                              |
|                                 |                                                                                                                                                                                                                                                                                                                                                                                                                                                                                                                                                                                                                  |

SCHOLARONE™  
Manuscripts



I, the Submitting Author has the right to grant and does grant on behalf of all authors of the Work (as defined in the below author licence), an exclusive licence and/or a non-exclusive licence for contributions from authors who are: i) UK Crown employees; ii) where BMJ has agreed a CC-BY licence shall apply, and/or iii) in accordance with the terms applicable for US Federal Government officers or employees acting as part of their official duties; on a worldwide, perpetual, irrevocable, royalty-free basis to BMJ Publishing Group Ltd ("BMJ") its licensees and where the relevant Journal is co-owned by BMJ to the co-owners of the Journal, to publish the Work in this journal and any other BMJ products and to exploit all rights, as set out in our [licence](#).

The Submitting Author accepts and understands that any supply made under these terms is made by BMJ to the Submitting Author unless you are acting as an employee on behalf of your employer or a postgraduate student of an affiliated institution which is paying any applicable article publishing charge ("APC") for Open Access articles. Where the Submitting Author wishes to make the Work available on an Open Access basis (and intends to pay the relevant APC), the terms of reuse of such Open Access shall be governed by a Creative Commons licence – details of these licences and which [Creative Commons](#) licence will apply to this Work are set out in our licence referred to above.

Other than as permitted in any relevant BMJ Author's Self Archiving Policies, I confirm this Work has not been accepted for publication elsewhere, is not being considered for publication elsewhere and does not duplicate material already published. I confirm all authors consent to publication of this Work and authorise the granting of this licence.



# 1 Safety and effectiveness of dose-sparing strategies for intramuscular seasonal influenza

## 2 vaccine:

### 3 A rapid scoping review

4 Carole Lunny<sup>1,2\*†</sup>

Email: [carole.lunny@ubc.ca](mailto:carole.lunny@ubc.ca)

5 Jesmin Antony<sup>2\*</sup>

Email: [jesmin.antony@unityhealth.to](mailto:jesmin.antony@unityhealth.to)

6 Patricia Rios<sup>3</sup>

Email: [patricia.rios@wchospital.ca](mailto:patricia.rios@wchospital.ca)

7 Chantal Williams<sup>3</sup>

Email: [chantal.williams@uhn.ca](mailto:chantal.williams@uhn.ca)

8 Naveeta Ramkissoon<sup>2</sup>

Email: [naveeta.ramkissoon@unityhealth.to](mailto:naveeta.ramkissoon@unityhealth.to)

9 Sharon E. Straus<sup>2,4,5</sup>

Email: [sharon.straus@unityhealth.to](mailto:sharon.straus@unityhealth.to)

10 Andrea C. Tricco<sup>2,6</sup>

Email: [andrea.tricco@unityhealth.to](mailto:andrea.tricco@unityhealth.to)

11 <sup>1</sup>Cochrane Hypertension Review Group and the Therapeutics Initiative, University of British

12 Columbia, Vancouver, BC

13 <sup>2</sup>Li Ka Shing Knowledge Institute, St. Michael's Hospital, Unity Health Toronto, Toronto,

14 Ontario, Canada

15 <sup>3</sup>Independent Researcher

16 <sup>4</sup>Department of Medicine, University of Toronto, Toronto, Ontario, Canada

17 <sup>5</sup>Department of Geriatric Medicine, University of Toronto, Toronto, Ontario, Canada

18 <sup>6</sup>Epidemiology Division, Dalla Lana School of Public Health and Institute for Health,

19 Management, and Evaluation, University of Toronto, Toronto, Ontario, Canada

20 \*These authors contributed equally.

21 †Corresponding Author

22 Carole Lunny, MPH, PhD, Postdoctoral Fellow, Methodology and Research Synthesis

23 SPOR Evidence Alliance, Unity Health, University of Toronto

1  
2  
3  
4  
5  
6  
7  
8  
9  
10  
11  
12  
13  
14  
15  
16  
17  
18  
19  
20  
21  
22  
23  
24  
25  
26  
27  
28  
29  
30  
31  
32  
33  
34  
35  
36  
37  
38  
39  
40  
41  
42  
43  
44  
45  
46  
47  
48  
49  
50  
51  
52  
53  
54  
55  
56  
57  
58  
59  
60

24 Word count: 3370

For peer review only

## 25 ABSTRACT

26 **Background:** The objective of this rapid scoping review was to identify studies of dose-sparing  
27 strategies for administration of intramuscular seasonal influenza vaccines in healthy individuals  
28 of all ages.

29 **Methods:** Comprehensive literature searches were executed in MEDLINE, EMBASE, and the  
30 Cochrane library. The grey literature was searched via international clinical trial registries for  
31 relevant studies published in English in the last 20 years. We included studies in healthy humans  
32 of any age that used any dose-sparing strategy to administer intramuscular seasonal influenza  
33 vaccines. Title/abstract and full-text screening were carried out by pairs of reviewers  
34 independently. Data extraction was conducted by a single reviewer and verified by a second  
35 reviewer. Our outcomes of interest were influenza infections, ICU admission, pneumonia,  
36 hospitalizations, adverse events, and mortality. Results were summarized descriptively.

37 **Results:** A total of 13 studies with 10,351 participants were included in the review and all  
38 studies were randomized control trials (RCTs) conducted between 2006 and 2019. The most  
39 common interventions were the trivalent influenza vaccine (n=10), followed by the quadrivalent  
40 influenza vaccine (n=4). Nine studies included infants/toddlers 6-36 months old and one of these  
41 studies also included children and adolescents. In these nine studies, no clinical effectiveness  
42 outcomes were reported. Of the four adult studies ( $\geq 18$  years), two studies reported on  
43 effectiveness outcomes.

44 **Conclusions:** Due to the low number of studies in healthy adults and the lack of studies  
45 assessing confirmed influenza and influenza-like illness, there remains a need for further  
46 evaluation.

47 **Keywords:**

## 48 **STRENGTHS AND LIMITATIONS OF THIS STUDY**

### 49 Strengths:

- 50 • This rapid scoping review was conducted within a 6-week timeline and the methods were  
51 tailored to provide results to the stakeholders within 4 weeks.
- 52 • We did not restrict the search dates and study screening was completed in independently  
53 by two reviewers.

### 54 Limitations:

- 55 • We limited the selection of studies to those published in the English language, and data  
56 extraction was conducted by one abstractor and one verifier.
- 57 • Twelve dose-sparing RCTs were not included in the review because they did not include  
58 vaccine interventions that were deemed of interest to the stakeholders, and/or did not  
59 provide sufficient data.

## 60 **BACKGROUND**

61 The symptoms of novel coronavirus disease (COVID-19) closely mimic those of seasonal  
62 influenza vaccine and health officials recommend vaccination against the flu to limit  
63 confounding of flu symptoms with COVID-19 symptoms. An anticipated shortage in influenza  
64 vaccine supplies was of concern.[1] This anticipated shortage did not happen however, and in the  
65 2019-2020 flu season, influenza vaccination coverage among adults (42%) was similar to the  
66 previous season (42%). This question of vaccine shortage remains relevant in Canada and other  
67 jurisdictions for future COVID-19 and flue seasons. As a potential solution, health officials were  
68 interested in assessing the effectiveness of fractional dosing (e.g., half-doses) of currently  
69 available intramuscular influenza vaccines.

70 Fractional dosing, or dose-sparing, strategies are those where less than the standard dose of  
71 hemagglutinin (HA) antigen, and thus less volume of vaccine, is administered, increasing the  
72 overall number of influenza vaccine doses available. In Canada, influenza vaccines are currently  
73 authorized for intramuscular administration only, apart from the live-attenuated influenza  
74 vaccine, which is administered intranasally.[2] Standard dose influenza vaccines contain 15 mcg  
75 of HA per strain and are delivered in 0.5 mL volume. Therefore, the total amount of HA in  
76 standard dose trivalent vaccines is 45 mcg, and the total amount of HA in standard dose  
77 quadrivalent vaccines is 60 mcg.

78 A scoping review of all the available dose-sparing strategies for intramuscular administration of  
79 seasonal influenza vaccines currently approved in Canada for healthy populations had not been  
80 systematically conducted. With the resource-constraints for the influenza season due to COVID-  
81 19, there was a need to scope the evidence on the safety and effectiveness of dose-sparing  
82 strategies for intramuscular administration of seasonal influenza vaccines. The objective of this

1  
2  
3 83 rapid scoping review was to identify studies of dose-sparing strategies for administration of  
4  
5 84 intramuscular seasonal influenza vaccines in healthy individuals of all ages. The results of this  
6  
7  
8 85 scoping review were used to inform a systematic review with meta-analysis by National  
9  
10 86 Advisory Committee on Immunization (NACI) on the same topic [3].

## 11 12 87 **METHODS**

13  
14  
15 88 The Centre for Immunization and Respiratory Infectious Diseases of the Public Health Agency  
16  
17 89 of Canada (PHAC) commissioned a rapid scoping review on the available methods for fractional  
18  
19 90 dosing of seasonal influenza vaccines through the Canadian Institutes of Health Research  
20  
21 (CIHR) Drug Safety and Effectiveness Network (DSEN) with a 6-week timeline for preliminary  
22  
23 91 results.  
24  
25

### 26 92 **Protocol**

27  
28  
29 94 The methods for this review were guided by the updated reviewer manual for scoping reviews  
30  
31 95 published by JBI and the World Health Organization's guide to rapid reviews.[4, 5] Results are  
32  
33 96 reported according to the Preferred Reporting Items for Systematic Reviews and Meta-analysis  
34  
35 97 extension to scoping reviews (PRISMA-ScR).[6] A protocol for this rapid scoping review was  
36  
37 98 disseminated through the Open Science Framework registry (<https://osf.io/8mwz2/>).  
38  
39

### 40 99 **Patient and Public Involvement statement**

41  
42  
43 100 No patients or the public were involved in this rapid scoping review.  
44

### 45 101 **Literature search**

46  
47 102 Comprehensive literature searches were developed and executed by an experienced librarian in  
48  
49 103 Ovid MEDLINE (**Appendix 1**), EMBASE using the OVID interface (**Appendix 2**), and the  
50  
51 104 Cochrane library between 1946 and May 2020 (**Appendix 3**). The literature search was peer  
52  
53 105 reviewed by a second librarian using the PRESS checklist  
54  
55  
56  
57  
58  
59  
60

1  
2  
3 106 (<https://www.cadth.ca/resources/finding-evidence/press>). The grey (i.e., difficult to locate or  
4  
5 107 unpublished) literature was searched via international clinical trial registries (i.e.  
6  
7 108 clinicaltrials.gov, EU clinical trial register). References of relevant systematic reviews and  
8  
9 109 included studies were also scanned.

## 110 **Eligibility criteria**

111 The eligibility criteria followed the Population, Intervention, Comparators, Outcome, Study  
112 design (PICOS) framework as follows:

- 113 • Population: Healthy humans of any age. Immunocompromised populations and animal  
114 studies were excluded. Examples of persons with weakened immune systems include those  
115 with HIV/AIDS; cancer and transplant patients who are taking certain immunosuppressive  
116 drugs; and those with inherited diseases that affect the immune system (e.g., congenital  
117 agammaglobulinemia, congenital IgA deficiency)[7].
- 118 • Intervention: Any dose-sparing strategy used to administer intramuscular seasonal influenza  
119 vaccines (eligible vaccines listed in **Appendix 4**). Eligible strategies included, but were not  
120 limited to, administering less than the standard 15 ug HA antigen using multi-dose vials, half  
121 dosing, or pre-formulated products with reduced antigen quantity, or with revised vaccine  
122 dose schedules. Any studies examining monovalent pandemic vaccines,  
123 specialty/experimental vaccines (e.g., high dose), whole virus vaccines, or other routes of  
124 administration (e.g. intranasal, intradermal) were not eligible. Only vaccine products  
125 approved for use in Canada or equivalent formulations approved for use in other countries  
126 were eligible for inclusion. Concomitant administration with other vaccine products were  
127 included only if administered to both the intervention and the comparator groups.
- 128 • Comparator: Any of the interventions listed above, no intervention, or placebo.

- 1  
2  
3 129 • Outcomes: Lab-confirmed influenza infection (primary outcome), influenza-like illness or  
4  
5 130 clinical/symptomatic diagnosis of influenza, hospitalization, intensive care unit (ICU)  
6  
7 131 admission, pneumonia, mortality, and adverse events (local/systemic reactogenicity,  
8  
9 132 vascular-related, serious). Reactogenicity represents the physical manifestation of the  
10  
11 133 inflammatory response to vaccination, and can include injection-site pain, redness, swelling  
12  
13 134 or induration at the injection site, as well as systemic symptoms, such as fever, myalgia, or  
14  
15 135 headache.[8]  
16  
17  
18  
19 136 • Study designs: Randomized controlled trials (RCTs), non-randomised studies (e.g., quasi-  
20  
21 137 RCTs, non-randomized trials, interrupted time series, controlled before after), and  
22  
23 138 observational studies (e.g., cohort, case control) were included. Studies must have had a  
24  
25 139 control or comparator group in order to be eligible for inclusion and as such, cross-sectional,  
26  
27 140 case series, case reports, and qualitative studies were excluded.  
28  
29  
30  
31 141 • Publication status: We included full text and abstracts if they included data on safety or  
32  
33 142 effectiveness.

34  
35 143 Inclusion was also limited to studies written in the English language due to the short timelines  
36  
37 144 for the conduct of this review.

### 38 39 40 145 **Study selection**

41  
42 146 A screening form based on the eligibility criteria was prepared and pilot-tested with 30 studies  
43  
44 147 with all members of the review team until sufficient agreement (>75%) was reached prior to both  
45  
46 148 title/abstract (level 1) and full-text (level 2) screening. Subsequent screening at level 1 and level  
47  
48 149 2 were completed by two reviewers working independently using the Knowledge Translation  
49  
50 150 Program's proprietary screening software (synthesi.SR)[9]. Any discrepancies between  
51  
52 151 reviewers were consistently resolved by a third independent reviewer.  
53  
54  
55  
56  
57  
58  
59  
60



## 152 **Data extraction**

153 Items for data collection included study characteristics (study design, year of publication,  
154 country of conduct, multi-center vs. single site), patient characteristics (mean age, age range, sex,  
155 vaccination history), intervention details (type of vaccine, vaccine manufacturer, dose, timing  
156 and administration of treatment), comparator details (comparator intervention, dose), and  
157 outcome results (influenza infections, ICU admission, pneumonia, hospitalizations, adverse  
158 events, mortality) at the longest duration of follow-up.

159 A standardized form for data extraction was developed and pilot tested by the entire review team  
160 using two pre-selected full-text RCTs to ensure understanding of the data items to be extracted,  
161 and congruence among reviewers. All included studies were extracted by one reviewer  
162 independently and then verified by a second reviewer.

## 163 **Risk of bias assessment**

164 As this was a scoping review, the risk of bias of studies was not assessed.[4]

## 165 **Synthesis**

166 The synthesis involved providing a descriptive summary of included studies with summary  
167 tables and detailed tables of study results. Study results were organized and tabulated according  
168 to patients (children vs adults), interventions, and outcomes and where available information on  
169 relevant subgroups.

## 170 **RESULTS**

### 171 **Literature search**

172 We screened 2,378 titles and abstracts from our database search and an additional 13 citations  
173 located through searching the grey literature and scanning references. Of these, 144 potentially  
174 relevant full-text articles were screened for eligibility (**Figure 1**). Twelve studies that assessed

175 dose-sparing strategies were excluded during full-text screening because the vaccine under study  
 176 was not of interest or unclearly reported. We contacted authors of these 12 unclear studies and  
 177 received 1 response confirming the vaccine was not of interest (see list of excluded studies in  
 178 **Appendix 5**). Subsequently, 13 RCTs were included; five trial protocols were found and were  
 179 denoted as duplicate/companion reports. No non-randomised or observational studies were found  
 180 that fulfilled the eligibility criteria.

### 181 **Study characteristics**

182 **Table 1** summarizes the characteristics of the 13 RCTs published between 2006 and 2019; and  
 183 conducted mainly in the US, followed by Mexico, Canada and Finland. The majority of the  
 184 studies evaluated trivalent vaccines (10/13 [77%]) and most were conducted in the 6-36 month-  
 185 old pediatric population (9/13 [69%]). Almost all studies reported on reactogenicity and/or other  
 186 adverse events, but only two studies reported on the effectiveness of our outcomes of interest  
 187 (i.e., lab-confirmed influenza and influenza-like illness).

188 Full study and patient characteristic details for each study are reported in **Appendix 6** and  
 189 treatment and outcome details in **Appendix 7**.

190 **Table 1: Characteristics of included studies (n=13)**

| Characteristics                   | Category      | Frequency (%) |
|-----------------------------------|---------------|---------------|
| Date of publication               | 2006-2010     | 4 (30.8)      |
|                                   | 2011-2015     | 5 (38.4)      |
|                                   | 2016-2020     | 4 (30.8)      |
| Multi-center or single site       | Multi-centre  | 8 (61.5)      |
|                                   | Single centre | 2 (15.4)      |
| Countries of conduct <sup>a</sup> | USA           | 8 (61.5)      |
|                                   | Mexico        | 3 (23.1)      |
|                                   | Canada        | 2 (15.4)      |
|                                   | Finland       | 2 (15.4)      |
|                                   | Belgium       | 1 (7.7)       |
|                                   | Hong Kong     | 1 (7.7)       |
|                                   | Taiwan        | 1 (7.7)       |
|                                   | Thailand      | 1 (7.7)       |

|                            |                                      |           |
|----------------------------|--------------------------------------|-----------|
| Populations <sup>a,b</sup> | Infants/Toddlers (6-36 months)       | 9 (69.2)  |
|                            | Children (37 months – 17 years)      | 1 (7.7)   |
|                            | Adults (18-64 years)                 | 3 (23.1)  |
|                            | Older adults (≥65)                   | 1 (7.7)   |
| Treatments <sup>a,c</sup>  | Trivalent influenza vaccine (TIV)    | 10 (76.9) |
|                            | Quadrivalent influenza vaccine (QIV) | 4 (30.8)  |
| Outcomes <sup>a</sup>      | Effectiveness                        | 2 (15.4)  |
|                            | Local and Systemic Reactogenicity    | 12 (92.3) |
|                            | Adverse events                       | 10 (76.9) |

<sup>a</sup>Each study can fit into more than one category so the total percentage will not add up to 100%

<sup>b</sup>One study includes both infants/toddlers and children, and another includes both adults and seniors

<sup>c</sup>One study includes both TIV and QIV arms

### 194 **RCTs in healthy children (<18 years old)**

195 Nine studies included infants/toddlers 6-36 months old and one study also included children and  
 196 adolescents (**Table 2**). None of these studies reported results on the effectiveness outcomes that  
 197 were relevant to our review and established *a priori*, however all of them reported on safety  
 198 outcomes.

199 **Table 2: Nine RCTs conducted in children (6 months – 17 years)**

| Author, Year                                            | Study period and countr(ies)             | Treatment arms<br>Brand name<br>(manufacturer)<br>HA/strain<br>[dosing] | Mean age<br>(SD)  | Age range     | Sex<br>(overall %<br>female) | Vaccination history<br>(overall %<br>previously immunized) | ITT sample size | Outcomes                          | Author reported conclusions                                                                                                                                                                                                                                          |
|---------------------------------------------------------|------------------------------------------|-------------------------------------------------------------------------|-------------------|---------------|------------------------------|------------------------------------------------------------|-----------------|-----------------------------------|----------------------------------------------------------------------------------------------------------------------------------------------------------------------------------------------------------------------------------------------------------------------|
| TRIVALENT AND QUADRIVALENT INFLUENZA VACCINES (TIV/QIV) |                                          |                                                                         |                   |               |                              |                                                            |                 |                                   |                                                                                                                                                                                                                                                                      |
| Cioppa, 2011[10]                                        | October 2008 – March 2009<br><br>Belgium | NR - TIV,<br><b>7.5-µg/strain</b> [2 x 0.25mL dose]                     | 20.0 months (7.0) | 6- <36 months | 43.5                         | NR                                                         | 25              | Local and Systemic reactogenicity | Reactogenicity of the 7.5-µg TIV/QIV formulations was slightly lower than for the corresponding 15-µg formulations.<br><br>The majority of unsolicited AEs were mild or moderate in severity and none of the SAEs was considered to be related to the study vaccine. |
|                                                         |                                          | Agrippal - TIV,<br><b>15-µg/strain</b> [2 x 0.5mL dose]                 | 15.0 months (8.8) | 6- <36 months | 43.5                         | NR                                                         | 22              | Adverse events                    |                                                                                                                                                                                                                                                                      |
|                                                         |                                          | NR - QIV,<br><b>7.5-µg/strain</b> [2 x 0.25mL dose]                     | 18.0 months (8.9) | 6- <36 months | 43.5                         | NR                                                         | 25              |                                   |                                                                                                                                                                                                                                                                      |
|                                                         |                                          | NR - QIV,<br><b>15-µg/strain</b> [2 x 0.5mL dose]                       | 15.2 months (7.8) | 6- <36 months | 43.5                         | NR                                                         | 28              |                                   |                                                                                                                                                                                                                                                                      |
|                                                         |                                          | Vaxigrip (Sanofi Pasteur),<br><b>7.5-µg/strain</b> [2 x 0.25mL dose]    | 16.1 months (8.5) | 6- <36 months | 43.5                         | NR                                                         | 26              |                                   |                                                                                                                                                                                                                                                                      |

| Author, Year         | Study period and countr(ies)                 | Treatment arms<br>Brand name<br>(manufacturer)<br>HA/strain<br>[dosing] | Mean age<br>(SD)  | Age range   | Sex<br>(overall %<br>female) | Vaccination history<br>(overall %<br>previously immunized) | ITT sample size | Outcomes                                                | Author reported conclusions                                                                                                                                                                                                                                                                                                                                                       |
|----------------------|----------------------------------------------|-------------------------------------------------------------------------|-------------------|-------------|------------------------------|------------------------------------------------------------|-----------------|---------------------------------------------------------|-----------------------------------------------------------------------------------------------------------------------------------------------------------------------------------------------------------------------------------------------------------------------------------------------------------------------------------------------------------------------------------|
| Skowronski, 2011[11] | September 2008 – December 2008<br><br>Canada | Vaxigrip (Sanofi-Pasteur),<br>15-µg/strain [2 x 0.5mL dose]             | 13.2 months (5.1) | 6-23 months | 53.2                         | 0                                                          | 124             | Local and Systemic reactogenicity<br><br>Adverse events | Local reactions generally were less common in infants than toddlers and more common with full doses versus half doses, but none of these differences were significant.<br><br>One serious adverse event was reported: a toddler in the half dose group was hospitalized with pneumonia 28 days after the first vaccination. The event was deemed unlikely related to the vaccine. |
|                      |                                              | Vaxigrip (Sanofi-Pasteur),<br>15-µg/strain [2 x 0.25mL dose]            | 12.8 months (5.0) | 6-23 months | 53.2                         | 0                                                          | 128             |                                                         |                                                                                                                                                                                                                                                                                                                                                                                   |

1  
2  
3  
4  
5  
6  
7  
8  
9  
10  
11  
12  
13  
14  
15  
16  
17  
18  
19  
20  
21  
22  
23  
24  
25  
26  
27  
28  
29  
30  
31  
32  
33  
34  
35  
36  
37  
38  
39  
40  
41  
42  
43  
44  
45  
46  
47

| Author, Year      | Study period and countr(ies) | Treatment arms<br>Brand name (manufacturer)<br>HA/strain [dosing]     | Mean age (SD)      | Age range   | Sex (overall % female) | Vaccination history (overall % previously immunized) | ITT sample size | Outcomes                          | Author reported conclusions                                                                                                                                                                                                                 |
|-------------------|------------------------------|-----------------------------------------------------------------------|--------------------|-------------|------------------------|------------------------------------------------------|-----------------|-----------------------------------|---------------------------------------------------------------------------------------------------------------------------------------------------------------------------------------------------------------------------------------------|
|                   |                              |                                                                       |                    |             |                        |                                                      |                 |                                   | Compared with 0.25-mL half-dosing, administration of 2 full 0.5-mL doses of trivalent inactivated influenza vaccine can increase antibody response without increasing reactogenicity in previously unimmunized infants aged 6 to 11 months. |
| Langley, 2012[12] | November 2008 – August 2009  | Fluviral F1 (Sanofi-Pasteur), <b>7.5-µg/strain</b> [1 x 0.25 mL dose] | 18.2 months (9.06) | 6-35 months | 47.9                   | 42.6                                                 | 164             | Local and Systemic reactogenicity | Fluviral F1 group had 1 case of pneumonia resolved. Fluviral F2 group had 1 case of                                                                                                                                                         |
|                   | Canada                       | Fluviral F2 (Sanofi-Pasteur), <b>15-µg/strain</b> [1 x 0.5mL dose]    | 17.5 months (8.27) | 6-35 months | 47.9                   | 42.6                                                 | 167             | Adverse events                    |                                                                                                                                                                                                                                             |

| Author, Year        | Study period and countr(ies) | Treatment arms<br>Brand name<br>(manufacturer)<br>HA/strain<br>[dosing] | Mean age<br>(SD)   | Age range   | Sex<br>(overall %<br>female) | Vaccination history<br>(overall %<br>previously immunized) | ITT sample size | Outcomes                          | Author reported conclusions                                                                                                                                                                                                                                                                                        |
|---------------------|------------------------------|-------------------------------------------------------------------------|--------------------|-------------|------------------------------|------------------------------------------------------------|-----------------|-----------------------------------|--------------------------------------------------------------------------------------------------------------------------------------------------------------------------------------------------------------------------------------------------------------------------------------------------------------------|
|                     |                              | Vaxigrip (Sanofi-Pasteur),<br><b>7.5-µg/strain</b> [1 x 0.25 mL dose]   | 17.0 months (8.33) | 6-35 months | 47.9                         | 42.6                                                       | 43              |                                   | bronchial hyper-reactivity in resolving stage.<br><br>The 0.5-mL dose of the study vaccine, when administered to children aged 6–35 months, resulted in a modest but not statistically significant improvement in immunogenicity with clinically similar safety and reactogenicity compared with the 0.25-mL dose. |
| Pavia-Ruz, 2013[13] | October 2008-March 2009      | Fluarix (GSK),<br><b>15-µg/strain</b> [1 x 0.5mL dose]                  | 21.2 months (8.37) | 6-35 months | 51                           | 30.1                                                       | 1018            | Local and Systemic reactogenicity | The reactogenicity and safety                                                                                                                                                                                                                                                                                      |

1  
2  
3  
4  
5  
6  
7  
8  
9  
10  
11  
12  
13  
14  
15  
16  
17  
18  
19  
20  
21  
22  
23  
24  
25  
26  
27  
28  
29  
30  
31  
32  
33  
34  
35  
36  
37  
38  
39  
40  
41  
42  
43  
44  
45  
46  
47

| Author, Year | Study period and countr(ies)                     | Treatment arms<br>Brand name (manufacturer)<br>HA/strain [dosing] | Mean age (SD)      | Age range   | Sex (overall % female) | Vaccination history (overall % previously immunized) | ITT sample size | Outcomes       | Author reported conclusions                                                                                                                                                                                                                                                                                                                     |
|--------------|--------------------------------------------------|-------------------------------------------------------------------|--------------------|-------------|------------------------|------------------------------------------------------|-----------------|----------------|-------------------------------------------------------------------------------------------------------------------------------------------------------------------------------------------------------------------------------------------------------------------------------------------------------------------------------------------------|
|              | Hong Kong, Mexico, Taiwan, Thailand, and the USA | Fluarix (GSK),<br>7.5-µg/strain [1 x 0.25 mL dose]                | 21.2 months (8.03) | 6-35 months | 51                     | 30.1                                                 | 1018            | Adverse events | <p>profile of the study vaccine did not appear to be affected by doubling the dose.</p> <p>One participant in the Flu-15µg group had two SAEs, (apnea and cyanosis) which were considered by the investigator to be possibly related to vaccination. The subject was hospitalized and the events resolved on the same day as they occurred.</p> |
|              |                                                  | Fluzone (Sanofi-Pasteur),<br>7.5-µg/strain [1 x 0.25 mL dose]     | 21.1 months (8.20) | 6-35 months | 51                     | 30.1                                                 | 1031            |                |                                                                                                                                                                                                                                                                                                                                                 |



| Author, Year     | Study period and countr(ies) | Treatment arms<br>Brand name<br>(manufacturer)<br>HA/strain<br>[dosing] | Mean age<br>(SD) | Age range                    | Sex<br>(overall %<br>female) | Vaccination history<br>(overall %<br>previously immunized) | ITT sample size | Outcomes                          | Author reported conclusions                                                                                                                                                                                                                                                                                                                                                                  |
|------------------|------------------------------|-------------------------------------------------------------------------|------------------|------------------------------|------------------------------|------------------------------------------------------------|-----------------|-----------------------------------|----------------------------------------------------------------------------------------------------------------------------------------------------------------------------------------------------------------------------------------------------------------------------------------------------------------------------------------------------------------------------------------------|
| Halasa, 2015[14] | 2010-2012<br><br>USA         | Fluzone (Sanofi Pasteur),<br><b>7.5-µg/strain</b> [1 x 0.25 mL dose]    | 13.5             | 6-35 months,<br>12-35 months | 52                           | 13.2                                                       | 80              | Local and Systemic reactogenicity | No significant differences between the full-dose or half-dose groups for either the fully primed or naive cohorts for systemic reactions or local reactions when both seasons were combined.<br><br>The only significant difference in the 2011–2012 season was that 8 of 48 (16.7%) participants in the half-dose group compared with 32 of 96 (33.3%) in the full-dose group had increased |
|                  |                              | Fluzone (Sanofi Pasteur),<br><b>15-µg/strain</b> [1 x 0.5 mL dose]      | 14.5             |                              |                              |                                                            | 163             |                                   |                                                                                                                                                                                                                                                                                                                                                                                              |

1  
2  
3  
4  
5  
6  
7  
8  
9  
10  
11  
12  
13  
14  
15  
16  
17  
18  
19  
20  
21  
22  
23  
24  
25  
26  
27  
28  
29  
30  
31  
32  
33  
34  
35  
36  
37  
38  
39  
40  
41  
42  
43  
44  
45  
46  
47

| Author, Year    | Study period and countr(ies)    | Treatment arms<br>Brand name (manufacturer)<br>HA/strain [dosing] | Mean age (SD)      | Age range   | Sex (overall % female) | Vaccination history (overall % previously immunized) | ITT sample size | Outcomes                          | Author reported conclusions                                                                                                                                                                                                                                                    |
|-----------------|---------------------------------|-------------------------------------------------------------------|--------------------|-------------|------------------------|------------------------------------------------------|-----------------|-----------------------------------|--------------------------------------------------------------------------------------------------------------------------------------------------------------------------------------------------------------------------------------------------------------------------------|
|                 |                                 |                                                                   |                    |             |                        |                                                      |                 |                                   | redness at the injection site (P < .05).<br><br>No significant differences between the groups in AE, SAE, or onset of chronic medical conditions between the dose groups in either the naive or fully primed cohorts, and none of the SAEs were deemed related to the vaccine. |
| Phung, 2016[15] | September 2010-<br>January 2011 | FLUAD (NR),<br>NR [1 x 0.5mL dose]                                | 68.7 months (18)   | 6-35 months | 55.8                   | 85.7                                                 | 60              | Local and Systemic reactogenicity | <i>Trial protocol with no author conclusions.</i>                                                                                                                                                                                                                              |
|                 | Finland                         | FLUAD (NR),<br>NR [1 x 0.25 mL dose]                              | 60.4 months (23.2) | 6-35 months | 55.8                   | 85.7                                                 | 75              | Adverse events                    |                                                                                                                                                                                                                                                                                |

For peer review only

| Author, Year   | Study period and countr(ies) | Treatment arms<br>Brand name<br>(manufacturer)<br>HA/strain<br>[dosing] | Mean age<br>(SD)  | Age range   | Sex<br>(overall %<br>female) | Vaccination history<br>(overall %<br>previously immunized) | ITT sample size | Outcomes                          | Author reported conclusions                                                                                                                                                                                                                             |
|----------------|------------------------------|-------------------------------------------------------------------------|-------------------|-------------|------------------------------|------------------------------------------------------------|-----------------|-----------------------------------|---------------------------------------------------------------------------------------------------------------------------------------------------------------------------------------------------------------------------------------------------------|
|                |                              | Agrippal S1 (NR),<br>NR [1 x 0.5mL dose]                                | 68 months (17.1)  | 6-35 months | 55.8                         | 85.7                                                       | 51              |                                   |                                                                                                                                                                                                                                                         |
|                |                              | Agrippal S1 (NR),<br>NR [1 x 0.25mL dose]                               | 32.4 months (1.9) | 6-35 months | 55.8                         | 85.7                                                       | 11              |                                   |                                                                                                                                                                                                                                                         |
| Jain, 2017[16] | 2014-2015 Influenza Season   | Flulaval (GSK),<br>15-µg/strain [1 x 0.5mL dose]                        | 19.7 months (8.7) | 6-35 months | 46.9                         | 57.5                                                       | 1013            | Local and Systemic reactogenicity | None of the febrile seizures or the SAEs were considered by the investigator to be related to vaccination.<br><br>Double-dose vaccines may improve protection against influenza B in some young children and simplifies annual influenza vaccination by |
|                | USA and New Mexico           | Fluzone (Sanofi Pasteur),<br>7.5-µg/strain [1 x 0.25 mL dose]           | 19.9 months (8.9) | 6-35 months | 46.9                         | 57.5                                                       | 1028            | Adverse events                    |                                                                                                                                                                                                                                                         |

1  
2  
3  
4  
5  
6  
7  
8  
9  
10  
11  
12  
13  
14  
15  
16  
17  
18  
19  
20  
21  
22  
23  
24  
25  
26  
27  
28  
29  
30  
31  
32  
33  
34  
35  
36  
37  
38  
39  
40  
41  
42  
43  
44  
45  
46  
47

| Author, Year    | Study period and countr(ies)              | Treatment arms<br>Brand name (manufacturer)<br>HA/strain [dosing]              | Mean age (SD)            | Age range           | Sex (overall % female) | Vaccination history (overall % previously immunized) | ITT sample size | Outcomes                                                | Author reported conclusions                                                                                                                                                                                                                                                         |
|-----------------|-------------------------------------------|--------------------------------------------------------------------------------|--------------------------|---------------------|------------------------|------------------------------------------------------|-----------------|---------------------------------------------------------|-------------------------------------------------------------------------------------------------------------------------------------------------------------------------------------------------------------------------------------------------------------------------------------|
|                 |                                           |                                                                                |                          |                     |                        |                                                      |                 |                                                         | allowing the same vaccine dose to be used for all eligible children and adults.                                                                                                                                                                                                     |
| Ojeda, 2019[17] | December 2017- January 2018<br><br>Mexico | Vaxigrip Tetra (Sanofi Pasteur)<br><b>PFS 15-µg/strain</b><br>[1 x 0.5mL dose] | NR (6 months – 17 years) | 6 months – 17 years | 46.4                   | NR                                                   | 149             | Local and Systemic reactogenicity<br><br>Adverse events | Solicited systemic reactions were reported in more infants aged 6 – 35 months in the MDV group than in the PFS group however this was not clinically significant.<br><br>AE not considered related to a study vaccine.<br><br>There were no differences in reactogenicity or safety |
|                 |                                           | Vaxigrip Tetra (Sanofi Pasteur)<br><b>MDV 15-µg/strain</b> [1 x 0.5mL dose]    | NR (6 months – 17 years) | 6 months – 17 years | 46.4                   | NR                                                   | 153             |                                                         |                                                                                                                                                                                                                                                                                     |

| Author, Year        | Study period and countr(ies) | Treatment arms<br>Brand name<br>(manufacturer)<br>HA/strain<br>[dosing] | Mean age<br>(SD)      | Age range   | Sex<br>(overall %<br>female) | Vaccination history<br>(overall %<br>previously immunized) | ITT sample size | Outcomes                          | Author reported conclusions                                                                                                                                                                                                                                                          |
|---------------------|------------------------------|-------------------------------------------------------------------------|-----------------------|-------------|------------------------------|------------------------------------------------------------|-----------------|-----------------------------------|--------------------------------------------------------------------------------------------------------------------------------------------------------------------------------------------------------------------------------------------------------------------------------------|
|                     |                              |                                                                         |                       |             |                              |                                                            |                 |                                   | between the two vaccine formats. These results showed that the MDV format of QIV was as safe and immunogenic as the PFS format in infants, children, and adolescents. These findings support the use of MDV QIV as a resource-saving alternative for seasonal influenza vaccination. |
| Robertson, 2019[18] | September 2016 – March 2017  | Fluzone (Sanofi Pasteur)<br><b>15-µg/strain</b><br>[1x0.5mL dose]       | 20.5 months<br>(8.55) | 6-35 months | 49.7                         | 47.25                                                      | 992             | Local and Systemic reactogenicity | No significant differences between full- and half-dose                                                                                                                                                                                                                               |

1  
2  
3  
4  
5  
6  
7  
8  
9  
10  
11  
12  
13  
14  
15  
16  
17  
18  
19  
20  
21  
22  
23  
24  
25  
26  
27  
28  
29  
30  
31  
32  
33  
34  
35  
36  
37  
38  
39  
40  
41  
42  
43  
44  
45  
46  
47

| Author, Year | Study period and countr(ies) | Treatment arms<br>Brand name (manufacturer)<br>HA/strain [dosing] | Mean age (SD)      | Age range   | Sex (overall % female) | Vaccination history (overall % previously immunized) | ITT sample size | Outcomes       | Author reported conclusions                                                                                                                                                                                                          |
|--------------|------------------------------|-------------------------------------------------------------------|--------------------|-------------|------------------------|------------------------------------------------------|-----------------|----------------|--------------------------------------------------------------------------------------------------------------------------------------------------------------------------------------------------------------------------------------|
|              | USA                          | Fluzone (Sanofi Pasteur)<br>7.5-µg/strain<br>[1x0.25 dose]        | 20.4 months (8.75) | 6-35 months | 49.7                   | 47.25                                                | 949             | Adverse events | groups.<br><br>AE leading to study discontinuation/ SAE not considered vaccine-related.<br><br>A full dose vaccine was immunogenic and had a safety profile comparable to that of a half dose, with no new safety concerns observed. |

**Abbreviations:** AE – adverse events; GMR – geometric mean ratio; GMFR – geometric mean fold rise; GMT - geometric mean antibody titer; HA - hemagglutinin; HAI - hemagglutination inhibition; ID – intradermal; IM – intramuscular; ITT – intent-to-treat; MDV – multi-dose vials, n – number of people with condition, N – sample size of treatment arm, NR – not reported, PFS – prefilled dose, SAEs – serious adverse events

1  
2  
3 **203 Safety outcomes**  
4

5 **204 Trivalent influenza vaccines**  
6

7  
8 **205** Six of the included RCTs assessed trivalent influenza vaccines (TIV) in young children (6-36  
9  
10 **206** months) and reported on local and systemic reactogenicity outcomes and other adverse  
11  
12 **207** events.[10-14, 19] Two RCTs compared the administration of full (0.5mL) and half (0.25mL)  
13  
14 **208** doses of the same standard 15µg/strain vaccine.[11, 19] The first RCT compared two full versus  
15  
16 **209** two half doses of TIV in previously unimmunized infants (6-11 months) and toddlers (12-23  
17  
18 **210** months) using Vaxigrip (15µg/strain).[11] The study found that in the infants group, two full 0.5-  
19  
20 **211** mL doses of vaccine did not increase reactogenicity. Local reactions were less common in  
21  
22 **212** infants than toddlers and more common with full doses versus half doses, but the differences  
23  
24 **213** were not statistically significant. An identified clinical trial registry compared a single  
25  
26 **214** intramuscular injection of 0.5mL to 0.25mL of FLUAD or Agrippal and showed comparable  
27  
28 **215** numbers of children with reactogenicity outcomes and other adverse events across the groups,  
29  
30 **216** but no significance levels or conclusions were provided by the investigators upon contact.[19]  
31  
32 **217** The objective of three of the included RCTs was to examine the impact of administering the full  
33  
34 **218** adult dose of 15µg/strain vaccines compared with the usual children's dose of 7.5µg/strain in  
35  
36 **219** infants and toddlers.[12-14] A multicenter RCT was conducted in Canada assessing the safety of  
37  
38 **220** full-dose Fluviral TIV (15µg/strain) compared with the half-dose (7.5µg/strain) and an active  
39  
40 **221** comparator Vaxigrip (7.5µg/strain).[12] Compared with the half-dose, the full-dose vaccine  
41  
42 **222** resulted in clinically similar reactogenicity and safety. A similar three-arm RCT to assess the use  
43  
44 **223** of Fluarix at two different dose levels (7.5µg/strain and 15µg/strain) compared to an established  
45  
46 **224** control vaccine Fluzone (7.5µg/strain) also found the reactogenicity and safety profile of Fluarix  
47  
48 **225** did not appear to be affected by doubling the dose, but one participant in the 15µg group had two  
49  
50  
51  
52  
53  
54  
55  
56  
57  
58  
59  
60

1  
2  
3 226 serious adverse events (apnea and cyanosis) that were considered by the investigator to be  
4  
5 227 possibly related to vaccination.[13] A third multicenter RCT compared the 15 µg/strain  
6  
7 228 formulation to the 7.5µg/strain formulation of Fluzone (Sanofi Pasteur) administered to young  
8  
9 229 children across multiple influenza seasons.[14] This study also found no statistically significant  
10  
11 230 differences between the full-dose or half-dose groups for systemic reactions, local reactions or  
12  
13 231 adverse events when both seasons were combined; however, in the 2011–2012 season, 8 of 48  
14  
15 232 (16.7%) participants in the half-dose group compared with 32 of 96 (33.3%) in the full-dose  
16  
17 233 group had increased redness at the injection site ( $P < .05$ ).

18  
19 234 Cioppa et al. (2009) was the only trial that compared the safety and tolerability of both TIV and  
20  
21 235 QIV vaccine formulations.[10] The vaccine arms of interest were a QIV 15-µg/strain, TIV 15-  
22  
23 236 µg/strain, QIV 7.5-µg/strain, TIV 7.5-µg/strain, and a control Vaxigrip TIV 7.5-µg/strain  
24  
25 237 vaccine. Reactogenicity of the 7.5-µg TIV/QIV formulations was slightly lower than for the  
26  
27 238 corresponding 15-µg formulations, but there was no difference in reactogenicity between TIV  
28  
29 239 and QIV vaccines.

30  
31 240 Quadrivalent influenza vaccines

32  
33 241 Four of the included RCTs evaluated quadrivalent influenza vaccines (QIV) in children.[10, 16-  
34  
35 242 18] All of the studies reported reactogenicity outcomes and other adverse events. The Cioppa et  
36  
37 243 al. (2009) RCT reported both TIV and QIV vaccines and the results are reported above.[10] Two  
38  
39 244 studies compared full-dose QIV to pediatric 7.5µg/strain Fluzone. In the first RCT, full dose  
40  
41 245 Fluzone had a similar safety profile to half-dose Fluzone with a single adverse event being  
42  
43 246 attributed to the study vaccine.[18] Similarly, the second study found that full-dose Flulaval may  
44  
45 247 improve protection against influenza in some young children when compared to low-dose  
46  
47 248 Fluzone, and in this RCT, none of the adverse events were considered to be study-related as  
48  
49  
50  
51  
52  
53  
54  
55  
56  
57  
58  
59  
60



1  
2  
3 249 reported by the investigator.[16] The final trial evaluated Vaxigrip Tetra (15µg/strain)  
4  
5 250 administered to children and adolescents in two different formats.[17] Vaxigrip administered as a  
6  
7 251 single dose using a pre-filled syringe (PFS) was compared to a 10-dose multi-dose vial (MDV).  
8  
9 252 Systemic reactions were reported in more infants aged 6 – 35 months in the MDV group than in  
10  
11 253 the PFS group; however this difference was not clinically significant. The authors concluded that  
12  
13 254 there was no difference in reactogenicity or safety between the two vaccine formats in infants,  
14  
15 255 children, and adolescents.  
16  
17  
18

19 256 **RCTs in healthy adults (≥18 years old)**

20  
21 257 One RCT included healthy adults over 18 years, two studies included healthy adults from 18-45  
22  
23 258 and 18-65 years old, and one study included older healthy adults (≥ 65 years) (**Table 3**). Two  
24  
25 259 studies reported on effectiveness outcomes and three on reactogenicity and other adverse events.  
26  
27

28 260 All four RCTs evaluated Fluzone QIV.  
29  
30  
31  
32  
33  
34  
35  
36  
37  
38  
39  
40  
41  
42  
43  
44  
45  
46  
47  
48  
49  
50  
51  
52  
53  
54  
55  
56  
57  
58  
59  
60

261 **Table 3: Four RCTs conducted in adults ( $\geq 18$  years old)**

| Author, Year                          | Study period and countr(ies)            | Treatment arms<br>Brand name (manufacturer)<br>HA/strain [dosing]                    | Mean age (SD)  | Age range | Sex (overall % female) | Vaccination history (overall % previously immunized) | ITT sample size | Relevant Outcomes                            | Author reported conclusions                                                                                                                                                                                                                                                                                                                                |
|---------------------------------------|-----------------------------------------|--------------------------------------------------------------------------------------|----------------|-----------|------------------------|------------------------------------------------------|-----------------|----------------------------------------------|------------------------------------------------------------------------------------------------------------------------------------------------------------------------------------------------------------------------------------------------------------------------------------------------------------------------------------------------------------|
| QUADRIVALENT INFLUENZA VACCINES (QIV) |                                         |                                                                                      |                |           |                        |                                                      |                 |                                              |                                                                                                                                                                                                                                                                                                                                                            |
| Kramer, 2006 [20]                     | October 2004 – November 2004<br><br>USA | Fluzone (Aventis Pasteur),<br><b>15-<math>\mu</math>g/strain</b> [1 x 0.5mL dose]    | NR (>18 years) | >18 years | NR                     | NR                                                   | 222             | Lab-confirmed influenza                      | There was no significant difference between the full-dose and half-dose groups in the diagnosis of influenza or in the proportion of participants self-reporting four or more symptoms consistent with influenza-like illness.<br><br>No adverse events were noted by participants from either group or reported to the IRB during the course of the study |
|                                       |                                         | Fluzone (Aventis Pasteur),<br><b>7.5-<math>\mu</math>g/strain</b> [1 x 0.25 mL dose] | NR (>18 years) | >18 years | NR                     | NR                                                   | 222             | Influenza-like illness<br><br>Adverse events |                                                                                                                                                                                                                                                                                                                                                            |

| Author, Year      | Study period and countr(ies)  | Treatment arms<br>Brand name (manufacturer)<br>HA/strain [dosing]     | Mean age (SD)      | Age range   | Sex (overall % female) | Vaccination history (overall % previously immunized) | ITT sample size | Relevant Outcomes                                   | Author reported conclusions                                                                                                                                                                                                                                                                                                                                                                                                         |
|-------------------|-------------------------------|-----------------------------------------------------------------------|--------------------|-------------|------------------------|------------------------------------------------------|-----------------|-----------------------------------------------------|-------------------------------------------------------------------------------------------------------------------------------------------------------------------------------------------------------------------------------------------------------------------------------------------------------------------------------------------------------------------------------------------------------------------------------------|
| Engler, 2008 [21] | November 2004 – December 2004 | Fluzone (Aventis Pasteur),<br><b>15-µg/strain</b> [1 x 0.5mL dose]    | NR (18 – 64 years) | 18-64 years | 43.4                   | 0                                                    | 554             | Influenza-like illness<br>Hospital/ER visits        | The relative risk of medical visits and hospitalizations for influenza-like illnesses were similar in the half- and full-dose group regardless of age, and there was no evidence of ILI symptom differences by sex or dose during the 21 days after immunizations.<br><br>Although injection site pain was greater for full- vs half-dose (19.9% vs 14.4%; p=.01), when analyzed for clinically significant pain levels significant |
|                   | USA                           | Fluzone (Aventis Pasteur),<br><b>7.5-µg/strain</b> [1 x 0.25 mL dose] | NR (18 – 64 years) | 18-64 years | 43.4                   | 0                                                    | 556             | Local and Systemic reactogenicity<br>Adverse events |                                                                                                                                                                                                                                                                                                                                                                                                                                     |

1  
2  
3  
4  
5  
6  
7  
8  
9  
10  
11  
12  
13  
14  
15  
16  
17  
18  
19  
20  
21  
22  
23  
24  
25  
26  
27  
28  
29  
30  
31  
32  
33  
34  
35  
36  
37  
38  
39  
40  
41  
42  
43  
44  
45  
46  
47

| Author, Year      | Study period and countr(ies) | Treatment arms<br>Brand name (manufacturer)<br>HA/strain [dosing] | Mean age (SD)    | Age range   | Sex (overall % female) | Vaccination history (overall % previously immunized) | ITT sample size | Relevant Outcomes                 | Author reported conclusions                                                                                                                                                                                                     |
|-------------------|------------------------------|-------------------------------------------------------------------|------------------|-------------|------------------------|------------------------------------------------------|-----------------|-----------------------------------|---------------------------------------------------------------------------------------------------------------------------------------------------------------------------------------------------------------------------------|
|                   |                              |                                                                   |                  |             |                        |                                                      |                 |                                   | <p>dose-dependent pain differences were not identified.</p> <p>Joint and/or muscle pain were significantly different (p=.02 and p=.03, respectively) by dose.</p> <p>No other adverse event differed significantly by dose.</p> |
| Belshe, 2007 [22] | NR<br>USA                    | Fluzone (Sanofi-Pasteur),<br><b>15-µg/strain</b> [1 x 0.5mL dose] | 31.5 years (9.6) | 18-49 years | 71.2                   | 0                                                    | 31              | Local and Systemic reactogenicity | Intradermal (ID) vaccine induced significantly more local inflammatory response than Intramuscular (IM) vaccine but this did not translate into an                                                                              |
|                   |                              | Fluzone (Sanofi-Pasteur),<br><b>9-µg/strain</b> [1 x 0.3mL dose]  | 31.2 years (9.4) | 18-49 years | 71.2                   | 0                                                    | 32              |                                   |                                                                                                                                                                                                                                 |

| Author, Year  | Study period and countr(ies) | Treatment arms<br>Brand name (manufacturer)<br>HA/strain [dosing] | Mean age (SD)     | Age range   | Sex (overall % female) | Vaccination history (overall % previously immunized) | ITT sample size | Relevant Outcomes                 | Author reported conclusions                                                                                               |
|---------------|------------------------------|-------------------------------------------------------------------|-------------------|-------------|------------------------|------------------------------------------------------|-----------------|-----------------------------------|---------------------------------------------------------------------------------------------------------------------------|
|               |                              | Fluzone (Sanofi-Pasteur),<br><b>6-µg/strain</b> [1 x 0.2mL dose]  | 30.1 years (10.3) | 18-49 years | 71.2                   | 0                                                    | 31              |                                   | increased immune response for ID vaccines compared to IM (primary comparison of this study was ID vs IM doses)            |
|               |                              | Fluzone (Sanofi-Pasteur),<br><b>3-µg/strain</b> [1 x 0.1mL dose]  | 31.9 years (10.3) | 18-49 years | 71.2                   | 0                                                    | 31              |                                   |                                                                                                                           |
| Chi, 2010[23] | August 2007-2008<br><br>USA  | Fluzone (Sanofi Pasteur),<br><b>15-µg/strain</b> [1 x 0.5mL dose] | 75.6 years (6.8)  | >65 years   | 17.8                   | 94.6                                                 | 65              | Local and Systemic reactogenicity | The two SAEs were acute coronary syndrome and appendicitis and neither were judged to be related to influenza vaccination |
|               |                              | Fluzone (Sanofi Pasteur),<br><b>9-µg/strain</b> [1 x 0.3mL dose]  | 75.2 years (7.7)  | >65 years   | 17.8                   | 94.6                                                 | 64              | Adverse events                    |                                                                                                                           |

**Abbreviations:** AE – adverse events, GMT - geometric mean antibody titer; HA - hemagglutinin; ID – intradermal; ILI – influenza-like illness; IM – intramuscular; MDV – multi-dose vials, n – number of people with condition, N – sample size of treatment arm, NR – not reported, PFS – prefilled syringe, SAE – serious adverse events

1  
2  
3 264 **Effectiveness outcomes**  
4

5 265 Two of the included RCTs that examined the same vaccine (Fluzone manufactured by Aventis  
6  
7 266 Pasteur) in healthy adult populations reported effectiveness outcomes including lab-confirmed  
8  
9  
10 267 influenza infections, influenza like illness, and/or hospitalizations or emergency room visits after  
11  
12 268 vaccination.[20, 21] The RCT by Kramer et al. (2006) found that 3.6% of participants receiving  
13  
14 269 a 15- $\mu$ g/strain dose of vaccine reported influenza like illness compared to 6.8% of participants  
15  
16 270 that received a 7.5- $\mu$ g/strain dose.[20] However, only one participant in the RCT that received  
17  
18 271 the 15- $\mu$ g/strain dose was confirmed via laboratory analysis to have influenza. The authors  
19  
20 272 concluded that half-dose and full-dose vaccinations appear to be similarly effective based on the  
21  
22 273 low rate of influenza infections and similar symptom surveys between both groups but  
23  
24 274 acknowledge that further studies examining immunogenicity are needed to confirm.  
25  
26

27  
28 275 A similar RCT by Engler et al. (2008) that compared a 15- $\mu$ g/strain dose of Fluzone vaccine to a  
29  
30 276 7.5- $\mu$ g/strain dose found equal proportions of participants reporting influenza like illness (9.7%  
31  
32 277 vs 9.9%) and hospitalizations or emergency room visits (0.3% v 0.2%).[21] The authors found  
33  
34 278 the relative risk of medical visits or hospitalizations between both groups was the same even  
35  
36 279 when adjusting for age and that age, sex, nor dose had an influence on the severity of influenza  
37  
38 280 like illness symptoms.  
39  
40

41  
42 281 **Safety outcomes**  
43

44 282 Three of the included studies in adult populations reported adverse events that occurred during  
45  
46 283 the trial while one RCT indicated that no adverse events were recorded for the duration of their  
47  
48 284 trial.[20-23] All three studies reporting adverse events compared different doses of Fluzone  
49  
50 285 vaccine including 3- $\mu$ g, 6- $\mu$ g, 7.5- $\mu$ g, 9- $\mu$ g, and 15- $\mu$ g per strain doses.  
51  
52  
53  
54  
55  
56  
57  
58  
59  
60

1  
2  
3 286 Two of the studies were carried out in healthy adult populations and one RCT was conducted in  
4  
5 287 older healthy adults (>60 years of age).[21-23] One RCT found that joint or muscle pain  
6  
7 288 following vaccination was statistically significantly higher in the full dose (15- $\mu$ g) group  
8  
9 289 compared to the half-dose (7.5- $\mu$ g) group and that while injection site pain initially appeared to  
10  
11 290 be statistically significantly higher in the full dose group, when adjusted to include only  
12  
13 291 clinically significant pain levels (>3 out of 5 on a visual analogue scale) the difference was no  
14  
15 292 longer statistically significant.[21] The RCT found no differences in occurrence or severity of  
16  
17 293 any other adverse effects. Similarly, one RCT comparing four different doses of Fluzone (3- $\mu$ g,  
18  
19 294 6- $\mu$ g, 9- $\mu$ g, and 15- $\mu$ g per strain) did not report any differences between the IM vaccination  
20  
21 295 groups.[22] Finally, the RCT in older adults also found no difference in the occurrence or  
22  
23 296 severity of adverse events in the low dose (9- $\mu$ g) versus high dose (15- $\mu$ g) group and found no  
24  
25 297 serious adverse events that were considered related to the vaccine.[23]

## 31 **DISCUSSION**

32  
33 299 PHAC commissioned this rapid scoping review to identify the evidence for efficacy and safety of  
34  
35 300 fractional influenza vaccine dosing for intramuscular administration of seasonal influenza  
36  
37 301 vaccines in healthy individuals of all ages that have been evaluated in human trials. Thirteen  
38  
39 302 RCTs published between 2006 and 2019 comparing standard/full-dose and half/low-dose  
40  
41 303 vaccines were included in this scoping review after a comprehensive search of three electronic  
42  
43 304 databases, trial registries and references of relevant systematic reviews. The majority of the  
44  
45 305 included RCTs were conducted in children and evaluated trivalent influenza vaccines (TIV).  
46  
47 306 In young, healthy children, there were no effectiveness outcomes of interest reported. However,  
48  
49 307 local reactogenicity, systemic reactogenicity and adverse events were comparable across the full-  
50  
51 308 dose and half-dose TIV and QIV vaccine arms. In addition, the authors of one RCT in children  
52  
53  
54  
55  
56  
57  
58  
59  
60

1  
2  
3 309 and adolescents that compared full-dose QIV using pre-filled syringes (PFS) versus multi-dose  
4  
5 310 vials (MDV) also found no statistically significant differences in safety outcomes between  
6  
7 311 administration formats. In healthy adults (including older adults), half-dose QIV was considered  
8  
9 312 equally effective as high-dose in the two RCTs that assessed clinical effectiveness. Safety  
10  
11 313 profiles were similar across groups in all 4 RCTs.

12  
13  
14 314 A full systematic review with meta-analysis based on the studies and results of this scoping  
15  
16 315 review was conducted by the NACI and the report was published in January of 2021.[3] The  
17  
18 316 report found that there is some, but still insufficient, evidence that fractional doses of influenza  
19  
20 317 vaccine provided via the intramuscular route are effective and immunogenic in healthy  
21  
22 318 individuals. NACI concludes that since many of those at high risk of influenza (e.g., adults 65  
23  
24 319 years of age and older, individuals with specific underlying chronic health conditions) may have  
25  
26 320 a lower immune response to influenza vaccination already (due to immunosenescence in older  
27  
28 321 adults or a condition that alters immune function), it is important to ensure that those at high risk  
29  
30 322 continue to receive the full dose of influenza vaccine.

### 31 323 **Strengths and limitations**

32  
33  
34  
35  
36  
37 324 A strength of this rapid scoping review was that it was conducted within a 6-week timeline and  
38  
39 325 the methods were tailored to provide results to the stakeholders within 4 weeks. We also did not  
40  
41 326 restrict the search dates and study screening was completed independently by two reviewers. We  
42  
43 327 developed a comprehensive search using three major databases, and searched the grey literature.  
44  
45 328 We engaged with the NACI stakeholder group, who provided input on the PICO criteria, and  
46  
47 329 funded this rapid scoping review.

48  
49  
50  
51 330 We were limited by the lack of studies providing objective outcome data. Only one RCT by  
52  
53 331 Kramer et al. reported the objective outcome “lab confirmed influenza”, and the other RCT by



1  
2  
3 332 Engler only reported the outcome “influenza like illness” [20, 21]. Since a 2014 review found  
4  
5 333 that less than 25% of cases diagnosed by physicians as influenza like illness were later laboratory  
6  
7 334 proven influenza cases [24], we are lacking RCTs examining fractional dosing of IM influenza  
8  
9 335 immunization. Further, twelve dose-sparing RCTs were not included because they did not  
10  
11 336 provide sufficient data, and did not include vaccines that were deemed of interest to the  
12  
13 337 stakeholders. Another limitation was that only studies published in the English language were  
14  
15 338 included, and data extraction was conducted by one abstractor and one verifier. Since this was a  
16  
17 339 scoping review, we did not appraise the methodological quality of the included studies.[25]  
18  
19  
20  
21

#### 22 340 **Future research**

23  
24 341 Dose-sparing approaches such as intradermal (ID) immunisation vaccination exhibits similar, or  
25  
26 342 even enhanced, immunogenicity, when using a fractional dose only, as compared to  
27  
28 343 intramuscular or subcutaneous immunisation, and should be explored in future scoping  
29  
30 344 reviews.[26]  
31  
32

#### 33 345 **CONCLUSIONS**

34  
35 346 In our scoping review, we found 13 RCTs on the efficacy and safety of fractional doses of  
36  
37 347 influenza vaccine provided via the intramuscular route to healthy adults and children. These  
38  
39 348 studies were used to inform a systematic review with meta-analysis which were commissioned  
40  
41 349 by the PHAC. We found that due to the low number of studies in healthy adults and the lack of  
42  
43 350 studies assessing confirmed influenza and influenza-like illness, there remains a need for further  
44  
45 351 evaluation of the clinical effectiveness of IM dose-sparing strategies using vaccines currently  
46  
47 352 available in this population.  
48  
49  
50  
51  
52  
53  
54  
55  
56  
57  
58  
59  
60

1  
2  
3 353 **LIST OF ABBREVIATIONS**  
4

5 354 PHAC – Public Health Agency of Canada  
6

7  
8 355 CIHR – Canadian Institutes of Health Research  
9

10 356 DSEN – Drug Safety and Effectiveness Network  
11

12 357 MAGIC – Methods and Application Group in Indirect Comparisons  
13

14 358 PRISMA-ScR – Preferred Reporting Items for Systematic Reviews and Meta-analysis extension  
15

16  
17 359 to scoping reviews  
18

19 360 ICU – Intensive Care Unit  
20

21 361 RCT – Randomized controlled trials  
22

23 362 NRCTs – non-randomized controlled trials  
24

25 363 TIV – Trivalent Influenza Vaccine  
26

27 364 AE – Adverse Events  
28

29 365 SAE – Serious adverse events  
30

31 366 QIV – Quadrivalent Influenza Vaccine  
32

33 367 PFS – Pre-filled syringe  
34

35 368 MDV – Multi-dose vial  
36

37  
38  
39 369 **DECLARATIONS**  
40

41  
42 370 **Ethics approval and consent to participate**  
43

44 371 Not applicable  
45

46 372 **Consent for publication**  
47

48  
49 373 Not applicable  
50  
51  
52  
53  
54  
55  
56  
57  
58  
59  
60

1  
2  
3 374 **Availability of data and materials**  
4

5 375 The dataset(s) supporting the conclusions of this article is(are) included within the article (and its  
6  
7  
8 376 additional file(s)).  
9

10 377 **Competing interests**  
11

12 378 The authors have no competing interests to declare.  
13

14 379 **Funding**  
15

16  
17 380 This work was supported through the Drug Safety and Effectiveness Network funded by the  
18  
19 381 Canadian Institutes of Health Research, the funders had no involvement in the design, conduct,  
20  
21 382 or publication of this study. SES is funded by a Tier 1 Canada Research Chair in Knowledge  
22  
23 383 Translation and the Mary Trimmer Chair in Geriatric Medicine; ACT is funded by a Tier 2  
24  
25 384 Canada Research Chair in Knowledge Synthesis.  
26  
27

28 385 **Open Access**  
29

30 386 This is an Open Access article distributed in accordance with the Creative Commons Attribution  
31  
32 387 Non Commercial (CC BY-NC 4.0) license, which permits others to distribute, remix, adapt,  
33  
34 388 build upon this work non-commercially, and license their derivative works on different terms,  
35  
36 389 provided the original work is properly cited and the use is non-commercial. See:  
37  
38 390 <http://creativecommons.org/licenses/by-nc/4.0/>  
39  
40  
41

42 391 **Authors' contributions**  
43

44 392 CL wrote and revised the final manuscript. JA and PR screened citations and full-text articles,  
45  
46 393 abstracted and verified data, interpreted results and wrote the first draft manuscript. CW and NR  
47  
48 394 screened citations and full-text articles, abstracted data, and reviewed the manuscript. SES and  
49  
50 395 ACT developed the protocol, obtained funding, interpreted results, and edited the manuscript.  
51  
52  
53  
54  
55  
56  
57  
58  
59  
60

1  
2  
3 396 **Acknowledgements**  
4

5 397 The authors would like to thank Jessie McGowan for her assistance in developing literature  
6  
7 398 searches, Tamara Radar for PRESS of literature search, Alissa Epworth for her assistance  
9  
10 399 executing searches and retrieving articles, and Navjot Mann for her assistance in contacting  
11  
12 400 author's and formatting this manuscript.  
13

14  
15 401 **Additional files**

16  
17 402 **File Format:** Microsoft Word (.docx)  
18

19 403 **Title of Data:** Additional File 1 (Appendices 1-7)  
20

21 404 **Description of Data:** The appendices include the following additional information:  
22

23  
24 405 Appendix 1 – MEDLINE search strategy  
25

26 406 Appendix 2 – EMBASE search strategy  
27

28 407 Appendix 3 – Cochrane search strategy  
29

30  
31 408 Appendix 4 – List of eligible vaccines  
32

33 409 Appendix 5 – Excluded dose-sparing studies  
34

35 410 Appendix 6 – Study and patient data  
36

37  
38 411 Appendix 7 – Treatment and outcome data  
39

40 412 **FIGURE LEGEND**  
41

42  
43 413 Figure 1. Flow chart of studies included in the review  
44

45 414 Study flow diagram.  
46  
47  
48  
49  
50  
51  
52  
53  
54  
55  
56  
57  
58  
59  
60

1  
2  
3 415 **REFERENCES**  
4

- 5 416 1. PHAC. Seasonal Influenza Vaccination Coverage in Canada, 2019-2020. 2020.
- 6  
7 417 2. PHAC. Canadian Immunization Guide Chapter on Influenza and Statement on Seasonal  
8  
9 Influenza Vaccine for 2019–2020. 2019.
- 10  
11 418  
12 419 3. PHAC. Recommendations on fractional influenza vaccine dosing. 2021.  
13  
14 [15 420 https://www.canada.ca/en/public-health/services/immunization/national-advisory-committee-on-](https://www.canada.ca/en/public-health/services/immunization/national-advisory-committee-on-immunization-naci/recommendations-fractional-influenza-vaccine-dosing.html)  
16  
17 421 [immunization-naci/recommendations-fractional-influenza-vaccine-dosing.html](https://www.canada.ca/en/public-health/services/immunization/national-advisory-committee-on-immunization-naci/recommendations-fractional-influenza-vaccine-dosing.html)  
18
- 19 422 4. Peters MDJ, Marnie C, Tricco AC, et al. Updated methodological guidance for the  
20  
21 423 conduct of scoping reviews. *JBIM Evid Synth*. 2020;18(10):2119-26.
- 22  
23 424 5. World Health Organization AfHPaSR. Rapid reviews to strengthen health policy and  
24  
25 systems: a practical guide 2017. Available from: [26 425 https://www.who.int/alliance-](https://www.who.int/alliance-hpsr/resources/publications/rapid-review-guide/en/)  
27  
28 426 [hpsr/resources/publications/rapid-review-guide/en/](https://www.who.int/alliance-hpsr/resources/publications/rapid-review-guide/en/).
- 29  
30 427 6. Tricco AC, Lillie E, Zarin W, et al. PRISMA Extension for Scoping Reviews (PRISMA-  
31  
32 ScR): Checklist and Explanation. *Ann Intern Med*. 2018;169(7):467-73.
- 33  
34 429 7. Rubin LG, Levin MJ, Ljungman P, et al. 2013 IDSA Clinical Practice Guideline for  
35  
36 430 Vaccination of the Immunocompromised Host. *Clin Infect Dis*. 2013;58(3):e44-e100.
- 37  
38 431 8. Hervé C, Laupèze B, Del Giudice G, et al. The how's and what's of vaccine  
39  
40 432 reactogenicity. *npj Vaccines*. 2019;4(1):39.
- 41  
42 433 9. Synthesi.SR. Toronto, Canada: Knowledge Translation Program, St. Michael's Hospital;  
43  
44 434 2012.
- 45  
46 435 10. Della Cioppa G, Vesikari T, Sokal E, et al. Trivalent and quadrivalent MF59®-  
47  
48 436 adjuvanted influenza vaccine in young children: a dose-and schedule-finding study. *Vaccine*.  
49  
50 2011;29(47):8696-704.  
51  
52  
53  
54  
55  
56  
57  
58  
59  
60

- 1  
2  
3 438 11. Skowronski DM, Hottes TS, Chong M, et al. Randomized controlled trial of dose  
4  
5 439 response to influenza vaccine in children aged 6 to 23 months. *Pediatrics*. 2011;128(2):e276-89.  
6  
7  
8 440 12. Langley JM, Vanderkooi OG, Garfield HA, et al. Immunogenicity and safety of 2 dose  
9  
10 441 levels of a thimerosal-free trivalent seasonal influenza vaccine in children aged 6–35 months: a  
11  
12 442 randomized, controlled trial. *J Pediatric Infect Dis Soc*. 2012;1(1):55-63.  
13  
14  
15 443 13. Pavia-Ruz N, Angel Rodriguez Weber M, Lau Y-L, et al. A randomized controlled study  
16  
17 444 to evaluate the immunogenicity of a trivalent inactivated seasonal influenza vaccine at two  
18  
19 445 dosages in children 6 to 35 months of age. *Hum Vaccin Immunother*. 2013;9(9):1978-88.  
20  
21  
22 446 14. Halasa NB, Gerber MA, Berry AA, et al. Safety and immunogenicity of full-dose  
23  
24 447 trivalent inactivated influenza vaccine (TIV) compared with half-dose TIV administered to  
25  
26 448 children 6 through 35 months of age. *J Pediatric Infect Dis Soc*. 2015;4(3):214-24.  
27  
28  
29 449 15. Clinical Trial Results: A Phase IIIB, observer-blind, randomized, parallel groups,  
30  
31 450 extension study to evaluate the immunogenicity and safety following a single intramuscular dose  
32  
33 451 of FLUAD or Agrippal S1 influenza vaccines in healthy children previously vaccinated in the  
34  
35 452 V70P5 study. [Internet]. 2016 [cited July 6, 2020]. Available from:  
36  
37 453 <https://www.clinicaltrialsregister.eu/ctr-search/trial/2010-021644-18/results>.  
38  
39  
40 454 16. Jain VK, Domachowske JB, Wang L, et al. Time to change dosing of inactivated  
41  
42 455 quadrivalent influenza vaccine in young children: evidence from a phase III, randomized,  
43  
44 456 controlled trial. *J Pediatric Infect Dis Soc*. 2017;6(1):9-19.  
45  
46  
47 457 17. Ojeda J, Arredondo JL, Salcedo P, et al. Immunogenicity and safety of a multi-dose  
48  
49 458 quadrivalent inactivated influenza vaccine in individuals aged 6 months to 17 years: a  
50  
51 459 randomized phase III trial. *Hum Vaccin Immunother*. 2019:1-5.  
52  
53  
54  
55  
56  
57  
58  
59  
60

- 1  
2  
3 460 18. Robertson CA, Mercer M, Selmani A, et al. Safety and Immunogenicity of a Full-dose,  
4  
5 461 Split-virion, Inactivated, Quadrivalent Influenza Vaccine in Healthy Children 6-35 Months of  
6  
7 462 Age: A Randomized Controlled Clinical Trial. *Pediatr Infect Dis J*. 2019;38(3):323-8.
- 8  
9  
10 463 19. A Phase IIIB, observer-blind, randomized, parallel groups, extension study to evaluate  
11  
12 464 the immunogenicity and safety following a single intramuscular dose of FLUAD or Agrippal S1  
13  
14 465 influenza vaccines in healthy children previously vaccinated in the V70P5 study. [Internet]. 2015  
15  
16 466 [cited July 14, 2020]. Available from: [https://www.clinicaltrialsregister.eu/ctr-search/trial/2010-](https://www.clinicaltrialsregister.eu/ctr-search/trial/2010-021644-18/results)  
17  
18 467 [021644-18/results](https://www.clinicaltrialsregister.eu/ctr-search/trial/2010-021644-18/results).
- 19  
20  
21 468 20. Kramer JS, Durham C, Schroeder T, et al. Effectiveness of half-dose versus full-dose  
22  
23 469 influenza vaccine in health care workers. *Am J Health Syst Pharm*. 2006;63(21):2111-5.
- 24  
25  
26 470 21. Engler RJ, Nelson MR, Klote MM, et al. Half-vs full-dose trivalent inactivated influenza  
27  
28 471 vaccine (2004-2005): age, dose, and sex effects on immune responses. *Arch Intern Med*.  
29  
30 472 2008;168(22):2405-14.
- 31  
32  
33 473 22. Belshe RB, Newman FK, Wilkins K, et al. Comparative immunogenicity of trivalent  
34  
35 474 influenza vaccine administered by intradermal or intramuscular route in healthy adults. *Vaccine*.  
36  
37 475 2007;25(37-38):6755-63.
- 38  
39  
40 476 23. Chi RC, Rock MT, Neuzil KM. Immunogenicity and safety of intradermal influenza  
41  
42 477 vaccination in healthy older adults. *Clin Infect Dis*. 2010;50(10):1331-8.
- 43  
44  
45 478 24. Thomas RE. Is influenza-like illness a useful concept and an appropriate test of influenza  
46  
47 479 vaccine effectiveness? *Vaccine*. 2014;32(19):2143-9.
- 48  
49 480 25. Peters MD, Godfrey C, McInerney P, et al. Chapter 11: scoping reviews (2020 version).  
50  
51 481 *JBI manual for evidence synthesis, JBI*. 2020;2020.
- 52  
53  
54  
55  
56  
57  
58  
59  
60

1  
2  
3  
4  
5  
6  
7  
8  
9  
10  
11  
12  
13  
14  
15  
16  
17  
18  
19  
20  
21  
22  
23  
24  
25  
26  
27  
28  
29  
30  
31  
32  
33  
34  
35  
36  
37  
38  
39  
40  
41  
42  
43  
44  
45  
46  
47  
48  
49  
50  
51  
52  
53  
54  
55  
56  
57  
58  
59  
60

482 26. Schnyder JL, De Pijper CA, Garcia Garrido HM, et al. Fractional dose of intradermal  
483 compared to intramuscular and subcutaneous vaccination - A systematic review and meta-  
484 analysis. *Travel Med Infect Dis.* 2020;37:101868.

For peer review only



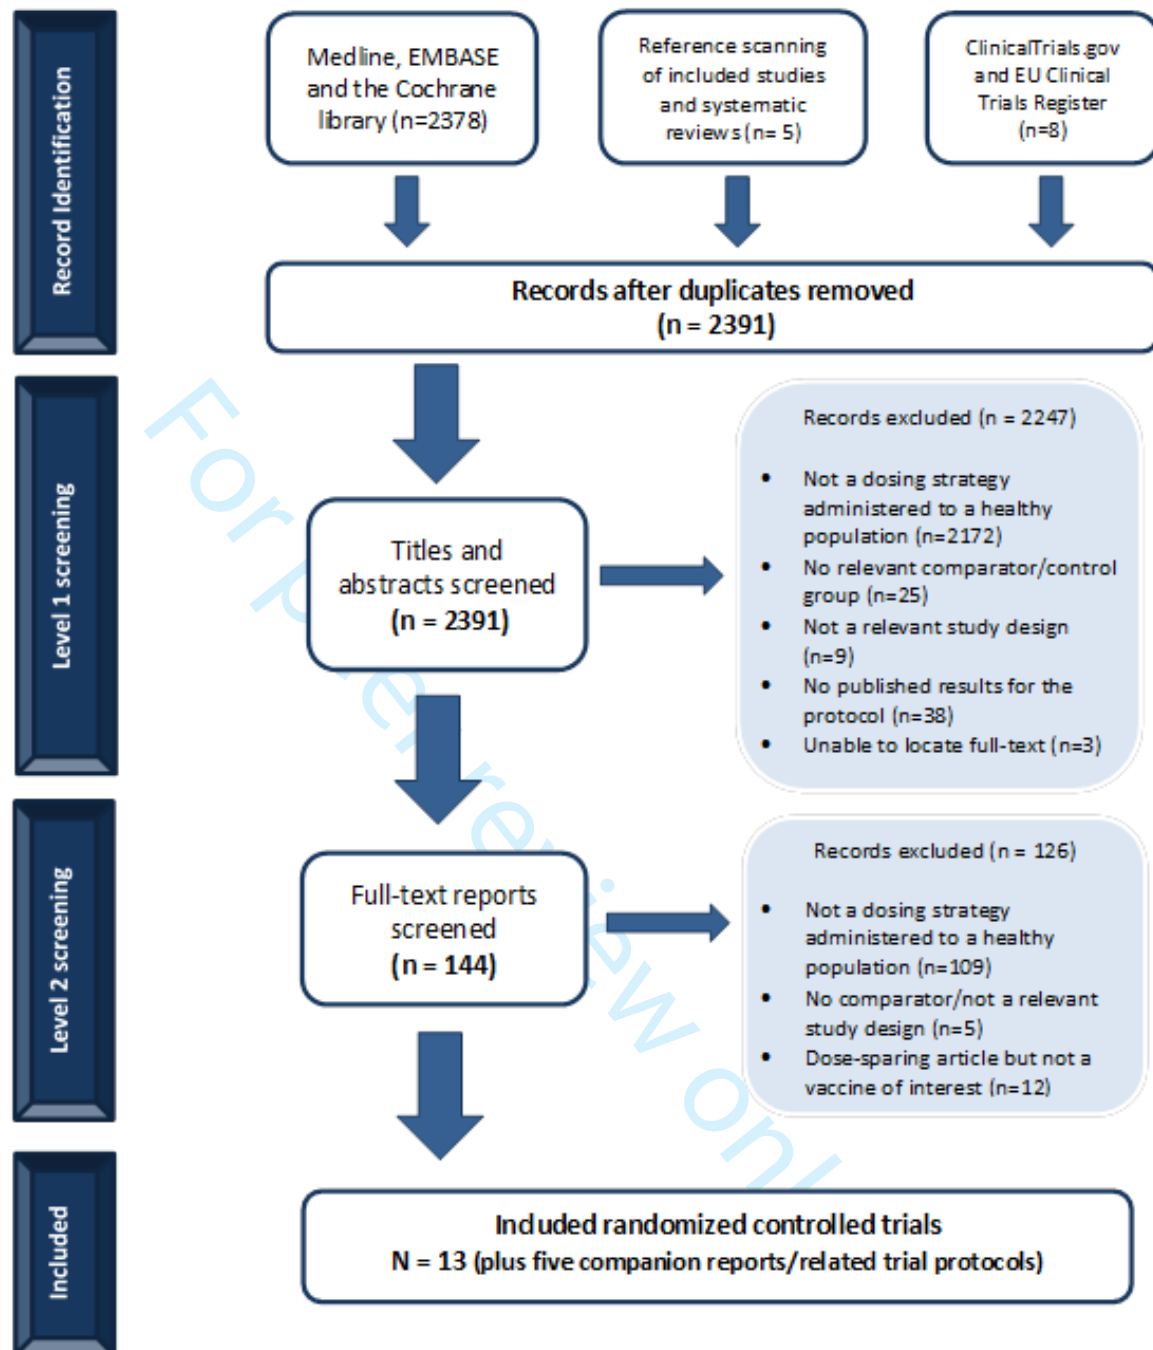

## PRISMA ScR checklist

| SECTION                                  | ITEM | PRISMA-ScR CHECKLIST ITEM                                                                                                                                                                                                                                                                                  | REPORTED ON PAGE # |
|------------------------------------------|------|------------------------------------------------------------------------------------------------------------------------------------------------------------------------------------------------------------------------------------------------------------------------------------------------------------|--------------------|
| <b>TITLE</b>                             |      |                                                                                                                                                                                                                                                                                                            |                    |
| <b>Title</b>                             | 1    | Identify the report as a scoping review.                                                                                                                                                                                                                                                                   | 1                  |
| <b>ABSTRACT</b>                          |      |                                                                                                                                                                                                                                                                                                            |                    |
| <b>Structured summary</b>                | 2    | Provide a structured summary that includes (as applicable): background, objectives, eligibility criteria, sources of evidence, charting methods, results, and conclusions that relate to the review questions and objectives.                                                                              | 2                  |
| <b>INTRODUCTION</b>                      |      |                                                                                                                                                                                                                                                                                                            |                    |
| <b>Rationale</b>                         | 3    | Describe the rationale for the review in the context of what is already known. Explain why the review questions/objectives lend themselves to a scoping review approach.                                                                                                                                   | 4                  |
| <b>Objectives</b>                        | 4    | Provide an explicit statement of the questions and objectives being addressed with reference to their key elements (e.g., population or participants, concepts, and context) or other relevant key elements used to conceptualize the review questions and/or objectives.                                  | 4                  |
| <b>METHODS</b>                           |      |                                                                                                                                                                                                                                                                                                            |                    |
| <b>Protocol and registration</b>         | 5    | Indicate whether a review protocol exists; state if and where it can be accessed (e.g., a Web address); and if available, provide registration information, including the registration number.                                                                                                             | 4                  |
| <b>Eligibility criteria</b>              | 6    | Specify characteristics of the sources of evidence used as eligibility criteria (e.g., years considered, language, and publication status), and provide a rationale.                                                                                                                                       | 5-6                |
| <b>Information sources*</b>              | 7    | Describe all information sources in the search (e.g., databases with dates of coverage and contact with authors to identify additional sources), as well as the date the most recent search was executed.                                                                                                  | 5                  |
| <b>Search</b>                            | 8    | Present the full electronic search strategy for at least 1 database, including any limits used, such that it could be repeated.                                                                                                                                                                            | Appendix 1-3       |
| <b>Selection of sources of evidence†</b> | 9    | State the process for selecting sources of evidence (i.e., screening and eligibility) included in the scoping review.                                                                                                                                                                                      | 6                  |
| <b>Data charting process‡</b>            | 10   | Describe the methods of charting data from the included sources of evidence (e.g., calibrated forms or forms that have been tested by the team before their use, and whether data charting was done independently or in duplicate) and any processes for obtaining and confirming data from investigators. | 6                  |
| <b>Data items</b>                        | 11   | List and define all variables for which data were sought and any assumptions and simplifications made.                                                                                                                                                                                                     | 6                  |

|                                                                                                                                                                                                                                                                                                                                                                                                                                                                                                                                                                                                                                                                                                                                                                                                                                                                                                                                                                                                                                                                                                                                                                                                                                                                                                                                                                                                                                                |    |                                                                                                                                                                                                       |                 |
|------------------------------------------------------------------------------------------------------------------------------------------------------------------------------------------------------------------------------------------------------------------------------------------------------------------------------------------------------------------------------------------------------------------------------------------------------------------------------------------------------------------------------------------------------------------------------------------------------------------------------------------------------------------------------------------------------------------------------------------------------------------------------------------------------------------------------------------------------------------------------------------------------------------------------------------------------------------------------------------------------------------------------------------------------------------------------------------------------------------------------------------------------------------------------------------------------------------------------------------------------------------------------------------------------------------------------------------------------------------------------------------------------------------------------------------------|----|-------------------------------------------------------------------------------------------------------------------------------------------------------------------------------------------------------|-----------------|
| <b>Critical appraisal of individual sources of evidence<sup>§</sup></b>                                                                                                                                                                                                                                                                                                                                                                                                                                                                                                                                                                                                                                                                                                                                                                                                                                                                                                                                                                                                                                                                                                                                                                                                                                                                                                                                                                        | 12 | If done, provide a rationale for conducting a critical appraisal of included sources of evidence; describe the methods used and how this information was used in any data synthesis (if appropriate). | N/A             |
| <b>Synthesis of results</b>                                                                                                                                                                                                                                                                                                                                                                                                                                                                                                                                                                                                                                                                                                                                                                                                                                                                                                                                                                                                                                                                                                                                                                                                                                                                                                                                                                                                                    | 13 | Describe the methods of handling and summarizing the data that were charted.                                                                                                                          | 6               |
| <b>RESULTS</b>                                                                                                                                                                                                                                                                                                                                                                                                                                                                                                                                                                                                                                                                                                                                                                                                                                                                                                                                                                                                                                                                                                                                                                                                                                                                                                                                                                                                                                 |    |                                                                                                                                                                                                       |                 |
| <b>Selection of sources of evidence</b>                                                                                                                                                                                                                                                                                                                                                                                                                                                                                                                                                                                                                                                                                                                                                                                                                                                                                                                                                                                                                                                                                                                                                                                                                                                                                                                                                                                                        | 14 | Give numbers of sources of evidence screened, assessed for eligibility, and included in the review, with reasons for exclusions at each stage, ideally using a flow diagram.                          | 6               |
| <b>Characteristics of sources of evidence</b>                                                                                                                                                                                                                                                                                                                                                                                                                                                                                                                                                                                                                                                                                                                                                                                                                                                                                                                                                                                                                                                                                                                                                                                                                                                                                                                                                                                                  | 15 | For each source of evidence, present characteristics for which data were charted and provide the citations.                                                                                           | 7, Appendix 6-7 |
| <b>Critical appraisal within sources of evidence</b>                                                                                                                                                                                                                                                                                                                                                                                                                                                                                                                                                                                                                                                                                                                                                                                                                                                                                                                                                                                                                                                                                                                                                                                                                                                                                                                                                                                           | 16 | If done, present data on critical appraisal of included sources of evidence (see item 12).                                                                                                            | N/A             |
| <b>Results of individual sources of evidence</b>                                                                                                                                                                                                                                                                                                                                                                                                                                                                                                                                                                                                                                                                                                                                                                                                                                                                                                                                                                                                                                                                                                                                                                                                                                                                                                                                                                                               | 17 | For each included source of evidence, present the relevant data that were charted that relate to the review questions and objectives.                                                                 | 8-25            |
| <b>Synthesis of results</b>                                                                                                                                                                                                                                                                                                                                                                                                                                                                                                                                                                                                                                                                                                                                                                                                                                                                                                                                                                                                                                                                                                                                                                                                                                                                                                                                                                                                                    | 18 | Summarize and/or present the charting results as they relate to the review questions and objectives.                                                                                                  | 25              |
| <b>DISCUSSION</b>                                                                                                                                                                                                                                                                                                                                                                                                                                                                                                                                                                                                                                                                                                                                                                                                                                                                                                                                                                                                                                                                                                                                                                                                                                                                                                                                                                                                                              |    |                                                                                                                                                                                                       |                 |
| <b>Summary of evidence</b>                                                                                                                                                                                                                                                                                                                                                                                                                                                                                                                                                                                                                                                                                                                                                                                                                                                                                                                                                                                                                                                                                                                                                                                                                                                                                                                                                                                                                     | 19 | Summarize the main results (including an overview of concepts, themes, and types of evidence available), link to the review questions and objectives, and consider the relevance to key groups.       | 25-27           |
| <b>Limitations</b>                                                                                                                                                                                                                                                                                                                                                                                                                                                                                                                                                                                                                                                                                                                                                                                                                                                                                                                                                                                                                                                                                                                                                                                                                                                                                                                                                                                                                             | 20 | Discuss the limitations of the scoping review process.                                                                                                                                                | 26              |
| <b>Conclusions</b>                                                                                                                                                                                                                                                                                                                                                                                                                                                                                                                                                                                                                                                                                                                                                                                                                                                                                                                                                                                                                                                                                                                                                                                                                                                                                                                                                                                                                             | 21 | Provide a general interpretation of the results with respect to the review questions and objectives, as well as potential implications and/or next steps.                                             | 27              |
| <b>FUNDING</b>                                                                                                                                                                                                                                                                                                                                                                                                                                                                                                                                                                                                                                                                                                                                                                                                                                                                                                                                                                                                                                                                                                                                                                                                                                                                                                                                                                                                                                 |    |                                                                                                                                                                                                       |                 |
| <b>Funding</b>                                                                                                                                                                                                                                                                                                                                                                                                                                                                                                                                                                                                                                                                                                                                                                                                                                                                                                                                                                                                                                                                                                                                                                                                                                                                                                                                                                                                                                 | 22 | Describe sources of funding for the included sources of evidence, as well as sources of funding for the scoping review. Describe the role of the funders of the scoping review.                       | 28              |
| <p>           JBI = Joanna Briggs Institute; PRISMA-ScR = Preferred Reporting Items for Systematic reviews and Meta-Analyses extension for Scoping Reviews.         </p> <p>           * Where sources of evidence (see second footnote) are compiled from, such as bibliographic databases, social media platforms, and Web sites.         </p> <p>           † A more inclusive/heterogeneous term used to account for the different types of evidence or data sources (e.g., quantitative and/or qualitative research, expert opinion, and policy documents) that may be eligible in a scoping review as opposed to only studies. This is not to be confused with information sources (see first footnote).         </p> <p>           ‡ The frameworks by Arksey and O'Malley (6) and Levac and colleagues (7) and the JBI guidance (4, 5) refer to the process of data extraction in a scoping review as data charting.         </p> <p>           § The process of systematically examining research evidence to assess its validity, results, and relevance before using it to inform a decision. This term is used for items 12 and 19 instead of "risk of bias" (which is more applicable to systematic reviews of interventions) to include and acknowledge the various sources of evidence that may be used in a scoping review (e.g., quantitative and/or qualitative research, expert opinion, and policy document).         </p> |    |                                                                                                                                                                                                       |                 |

## APPENDIX 1 – MEDLINE search strategy

Database: Ovid MEDLINE(R) ALL <1946 to May 29, 2020>

### Search Strategy:

-----

- 1 influenza, human/ or exp influenza a virus/ or exp influenzavirus b/ or influenzavirus c/
- 2 (flu or flue or influenza\* or grippe).tw,kf.
- 3 1 or 2
- 4 exp Vaccines/ or Immunization/
- 5 (vaccin\* or immuni\* or inocula\* or shot or jab).tw,kf.
- 6 4 or 5
- 7 3 and 6
- 8 influenza vaccines/ or Adjuvants, Immunologic/
- 9 (LAIV or Fluenz or FluMist or Afluria or Fluad or Fluzone or Flulaval or Fluarix or Flublok or
- 10 Flucelvax or FluQuadri or Vaxigrip or Influvac or Fluvirin or Agrippal or Begrivac or Fluad or
- 11 agriflu or fluviral).tw,kf.
- 12 7 or 8 or 9
- 13 Injections, Intramuscular/
- 14 (intramuscular or intra-muscular).tw,kf.
- 15 or/11-12
- 16 10 and 13
- 17 limit 14 to yr=2000-current
- 18 animals/ not humans/
- 19 15 not 16
- 20 ad.fs.
- 21 11 or 12 or 18
- 22 10 and 19
- 23 exp dose-response relationship, immunologic/
- 24 dose-Response Relationship, Drug/
- 25 (Dos\* sparing or Dose -sparing or half-dose or dose-response or dose response or dose
- 26 effect\* or dose-effect\* or fractional dos\*).tw,kf.
- 27 ((reduc\* or lower or less) adj2 (quantity or strength or standard)).tw,kf.
- 28 ((dos\* adj3 change) or (half adj3 dos\*)).tw,kf.
- 29 ((down adj3 titrat\*) or (dose adj3 titrat\*) or (dose adj3 reduc\*) or (dose adj3 "de-escalat\*")
- 30 or (dose adj3 taper\*)).tw,kf.
- 31 or/21-26
- 32 20 and 27
- 33 animals/ not humans/
- 34 28 not 29
- 35 limit 30 to yr=2000-current
- 36 17 or 31

## APPENDIX 2 – EMBASE search strategy

Database: Ovid MEDLINE(R) Embase <2000 to June 11, 2020>

### Search Strategy:

-----

1 influenza, human/ or exp influenza a virus/ or exp influenzavirus b/ or influenzavirus c/  
 2 (flu or flue or influenza\* or grippe).tw,kf.  
 3 1 or 2  
 4 exp Vaccines/ or Immunization/  
 5 (vaccin\* or immuni\* or inocula\* or shot or jab).tw,kf.  
 6 4 or 5  
 7 3 and 6  
 8 influenza vaccines/ or Adjuvants, Immunologic/  
 9 (LAIV or Fluenz or FluMist or Afluria or Fluad or Fluzone or Flulaval or Fluarix or Flublok  
 10 or Flucelvax or FluQuadri or Vaxigrip or Influvac or Fluvirin or Agrippal or Begrivac or Fluad or  
 11 agriflu or fluviral).tw,kf.  
 12 7 or 8 or 9  
 13 Injections, Intramuscular/  
 14 (intramuscular or intra-muscular).tw,kf.  
 15 or/11-12  
 16 10 and 13  
 17 limit 14 to yr=2009-current  
 18 animals/ not humans/  
 19 15 not 16  
 20 ad.fs.  
 21 11 or 12 or 18  
 22 10 and 19  
 23 exp dose-response relationship, immunologic/  
 24 dose-Response Relationship, Drug/  
 25 (Dos\* sparing or Dose -sparing or half-dose or dose-response or dose response or dose  
 26 effect\* or dose-effect\* or fractional dos\*).tw,kf.  
 27 ((reduc\* or lower or less) adj2 (quantity or strength or standard)).tw,kf.  
 28 ((dos\* adj3 change) or (half adj3 dos\*)).tw,kf.  
 29 ((down adj3 titrat\*) or (dose adj3 titrat\*) or (dose adj3 reduc\*) or (dose adj3 "de-  
 30 escalat\*") or (dose adj3 taper\*)).tw,kf.  
 31 or/21-26  
 32 20 and 27  
 33 animals/ not humans/  
 34 28 not 29  
 35 limit 30 to yr=2009-current  
 36 17 or 31  
 37 32 use ppez  
 38 exp Influenza virus/ or exp influenza/  
 39 (flu or flue or influenza\* or grippe).tw.  
 40 34 or 35  
 41 exp vaccine/  
 42 exp immunization/  
 43 influenza vaccination/ or vaccination/  
 44 (vaccin\* or immuni\* or inocula\* or shot or jab).tw.  
 45 or/37-40  
 46 36 and 41  
 47 influenza vaccination/

1  
2  
3 44 immunological adjuvant/  
4 45 (LAIV or Fluenz or FluMist or Afluria or Fluad or Fluzone or Flulaval or Fluarix or Flublok  
5 or Flucelvax or FluQuadri or Vaxigrip or Influvac or Fluvirin or Agrippal or Begrivac or Fluad or  
6 agriflu or fluviral).tw.  
7 46 or/42-45  
8 47 intramuscular drug administration/  
9 48 (intramuscular or intra-muscular).tw.  
10 49 47 or 48  
11 50 46 and 49  
12 51 limit 50 to yr="2009 -Current"  
13 52 animals/ not humans/  
14 53 51 not 52  
15 54 ad.fs.  
16 55 49 or 54  
17 56 46 and 55  
18 57 dose response/ or drug response/  
19 58 (Dos\* sparing or Dose -sparing or half-dose or dose-response or dose response or dose  
20 effect\* or dose-effect\* or fractional dos\*).tw.  
21 59 ((reduc\* or lower or less) adj2 (quantity or strength or standard)).tw.  
22 60 ((dos\* adj3 change) or (half adj3 dos\*)).tw.  
23 61 ((down adj3 titrat\*) or (dose adj3 titrat\*) or (dose adj3 reduc\*) or (dose adj3 "de-  
24 escalat\*") or (dose adj3 taper\*)).tw.  
25 62 or/57-61  
26 63 56 and 62  
27 64 animals/ not humans/  
28 65 63 not 64  
29 66 limit 65 to yr="2009 -Current"  
30 67 53 or 66  
31 68 67 use emczd  
32 69 33 or 68  
33 70 remove duplicates from 69  
34  
35  
36  
37  
38  
39  
40  
41  
42  
43  
44  
45  
46  
47  
48  
49  
50  
51  
52  
53  
54  
55  
56  
57  
58  
59  
60

### APPENDIX 3 – Cochrane search strategy

Database: Database: EBM Reviews - Cochrane Database of Systematic Reviews <2005 to June 03, 2020>, EBM Reviews - ACP Journal Club <1991 to May 2020>, EBM Reviews - Database of Abstracts of Reviews of Effects <1st Quarter 2016>, EBM Reviews - Cochrane Clinical Answers <May 2020>, EBM Reviews - Cochrane Central Register of Controlled Trials <May 2020>, EBM Reviews - Cochrane Methodology Register <3rd Quarter 2012>, EBM Reviews - Health Technology Assessment <4th Quarter 2016>, EBM Reviews - NHS Economic Evaluation Database <1st Quarter 2016>  
**Search Strategy:**

1 (influenza, human or influenza a virus or influenzavirus b or influenzavirus c).kw.  
 2 (flu or flue or influenza\* or grippe).ti,ab.  
 3 1 or 2  
 4 (Vaccines or Immunization).kw.  
 5 (vaccin\* or immuni\* or inocula\* or shot or jab).ti,ab.  
 6 4 or 5  
 7 3 and 6  
 8 (influenza vaccines or Adjuvants, Immunologic).kw.  
 9 (LAIV or Fluenz or FluMist or Afluria or Fluad or Fluzone or Flulaval or Fluarix or Flublok or Flucelvax or FluQuadri or Vaxigrip or Influvac or Fluvirin or Agrippal or Begrivac or Fluad or agriflu or fluviral).ti,ab.  
 10 7 or 8 or 9  
 11 Injections, Intramuscular.kw.  
 12 (intramuscular or intra-muscular).ti,ab.  
 13 11 or 12  
 14 10 and 13  
 15 dose-response relationship, immunologic.kw.  
 16 dose-Response Relationship, Drug.kw.  
 17 (Dos\* sparing or Dose -sparing or half-dose or dose-response or dose response or dose effect\* or dose-effect\* or fractional dos\*).ti,ab.  
 18 ((reduc\* or lower or less) adj2 (quantity or strength or standard)).ti,ab.  
 19 ((dos\* adj3 change) or (half adj3 dos\*)).ti,ab.  
 20 ((down adj3 titrat\*) or (dose adj3 titrat\*) or (dose adj3 reduc\*) or (dose adj3 "de-escalat\*") or (dose adj3 taper\*)).ti,ab.  
 21 or/15-20  
 22 10 and 21  
 23 14 or 22  
 24 limit 23 to yr="2009 -Current" [Limit not valid in DARE; records were retained]

Database: EBM Reviews - Cochrane Database of Systematic Reviews <2005 to June 03, 2020>, EBM Reviews - ACP Journal Club <1991 to May 2020>, EBM Reviews - Database of Abstracts of Reviews of Effects <1st Quarter 2016>, EBM Reviews - Cochrane Clinical Answers <May 2020>, EBM Reviews - Cochrane Central Register of Controlled Trials <May 2020>, EBM Reviews -

**Cochrane Methodology Register <3rd Quarter 2012>, EBM Reviews - Health Technology Assessment <4th Quarter 2016>, EBM Reviews - NHS Economic Evaluation Database <1st Quarter 2016>**  
**Search Strategy:**

---

- 1 (influenza, human or influenza a virus or influenzavirus b or influenzavirus c).kw.
- 2 (flu or flue or influenza\* or grippe).ti,ab.
- 3 1 or 2
- 4 (Vaccines or Immunization).kw.
- 5 (vaccin\* or immuni\* or inocula\* or shot or jab).ti,ab.
- 6 4 or 5
- 7 3 and 6
- 8 (influenza vaccines or Adjuvants, Immunologic).kw.
- 9 (LAIV or Fluenz or FluMist or Afluria or Fluad or Fluzone or Flulaval or Fluarix or Flublok or Flucelvax or FluQuadri or Vaxigrip or Influvac or Fluvirin or Agrippal or Begrivac or Fluad or agriflu or fluviral).ti,ab.
- 10 7 or 8 or 9
- 11 Injections, Intramuscular.kw.
- 12 (intramuscular or intra-muscular).ti,ab.
- 13 11 or 12
- 14 10 and 13
- 15 dose-response relationship, immunologic.kw.
- 16 dose-Response Relationship, Drug.kw.
- 17 (Dos\* sparing or Dose -sparing or half-dose or dose-response or dose response or dose effect\* or dose-effect\* or fractional dos\*).ti,ab.
- 18 ((reduc\* or lower or less) adj2 (quantity or strength or standard)).ti,ab.
- 19 ((dos\* adj3 change) or (half adj3 dos\*)).ti,ab.
- 20 ((down adj3 titrat\*) or (dose adj3 titrat\*) or (dose adj3 reduc\*) or (dose adj3 "de-escalat\*") or (dose adj3 taper\*)).ti,ab.
- 21 or/15-20
- 22 10 and 21
- 23 14 or 22
- 24 limit 23 to yr="2000 - 2008" [Limit not valid in DARE; records were retained]
- 25 from 24 keep 1-173



## APPENDIX 4 – List of eligible vaccines

| Product name (manufacturer)                         | Vaccine Characteristic |                                   |                                                     |                                                                    |                                                                                                    |
|-----------------------------------------------------|------------------------|-----------------------------------|-----------------------------------------------------|--------------------------------------------------------------------|----------------------------------------------------------------------------------------------------|
|                                                     | Vaccine type           | Route of administration           | Authorized ages for use                             | Antigen content for each vaccine strain                            | Formats available                                                                                  |
| Flulaval Tetra (GSK)                                | IIV4-SD (split virus)  | IM                                | 6 months and older                                  | 15 µg HA /0.5 mL dose                                              | 5 mL multi-dose vial<br>Single dose pre-filled syringe                                             |
| Fluzone Quadrivalent (Sanofi Pasteur)               | IIV4-SD (split virus)  | IM                                | 6 months and older                                  | 15 µg HA /0.5 mL dose                                              | 5 mL multi-dose vial<br>Single dose vial<br>Single dose pre-filled syringe without attached needle |
| Afluria Tetra (Seqirus)                             | IIV4-SD (split virus)  | IM                                | 5 years and older                                   | 15 µg HA /0.5 mL dose                                              | Up to expiry date indicate on vial label                                                           |
| Influvac Tetra (BGP Pharma ULC, operating as Mylan) | IIV4-SD (subunit)      | IM or deep subcutaneous injection | 3 years and older                                   | 15 µg HA /0.5 mL dose                                              | Single dose pre-filled syringe with or without a needle                                            |
| Vaxigrip Tetra                                      | IIV4                   | IM                                | 6 months and older                                  | Pediatric: 7.5 µg HA /0.25 mL dose<br>Adult: 15 µg HA /0.5 mL dose | 0.5 mL pre-filled syringe                                                                          |
| Fluarix Tetra/ Influxplit Tetra (GSK)               | IIV4                   | IM                                | 6 months and older                                  | 15 µg HA /0.5 mL dose                                              | 0.5 mL pre-filled syringe                                                                          |
| Agriflu (Seqirus)                                   | IIV3-SD (subunit)      | IM                                | 6 months and older                                  | 15 µg HA /0.5 mL dose                                              | 5 mL multi-dose vial<br>Single dose pre-filled syringe without attached needle                     |
| Fluad Pediatric and Fluad (Seqirus)                 | IIV3-Adj (subunit)     | IM                                | Pediatric: 6-23 months<br>Adult: 65 years and older | Pediatric: 7.5 µg HA /0.25 mL dose<br>Adult: 15 µg HA /0.5 mL dose | Single dose pre-filled syringe without a needle                                                    |
| Fluviral (GSK)                                      | IIV3-SD (split virus)  | IM                                | 6 months and older                                  | 15 µg HA /0.5 mL dose                                              | 5 mL multi-dose vial                                                                               |
| Fluzone TIV (Sanofi Pasteur)                        | IIV3-HD (split virus)  | IM                                | 65 years and older                                  | Adult: 15 µg HA /0.5 mL dose                                       | 0.5 mL pre-filled syringe                                                                          |
| Vaxigrip TIV                                        | IIV3-SD                | IM                                | 6 months and older                                  | Pediatric: 7.5 µg HA /0.25 mL dose<br>Adult: 15 µg HA /0.5 mL dose | 0.5 mL pre-filled syringe                                                                          |

**Note:** list of vaccines included in the review is based on feedback from PHAC and the 2020-2021 seasonal vaccine availability in Canada found here: <https://www.canada.ca/en/public-health/services/publications/vaccines-immunization/canadian-immunization-guide-statement-seasonal-influenza-vaccine-2020-2021.html#appA>

## APPENDIX 5 – Excluded dose-sparing studies

|    | Reference                                                                                                                                                                                                                                                                                                                                                                                                                                                                                                                           | Reason for exclusion                                                     |
|----|-------------------------------------------------------------------------------------------------------------------------------------------------------------------------------------------------------------------------------------------------------------------------------------------------------------------------------------------------------------------------------------------------------------------------------------------------------------------------------------------------------------------------------------|--------------------------------------------------------------------------|
| 1  | Euctr, H. U. A Randomized, Double-blind, Multi-Center Study to Evaluate Safety and Immunogenicity of One Dose of Four FLUVAL AB-like (Trivalent, Whole Virus, Aluminium Phosphate Gel Adjuvanted) Influenza Vaccines Containing 3.5[micro]gHA, 6[micro]gHA, 9[micro]gHA or 1. 2011. Available from: <a href="http://www.who.int/trialsearch/Trial2.aspx?TrialID=EUCTR2011">http://www.who.int/trialsearch/Trial2.aspx?TrialID=EUCTR2011</a>                                                                                         | exclude - dose-sparing but vaccine not of interest                       |
| 2  | Vajo Z, Tamas F, Jankovics I. A reduced-dose seasonal trivalent influenza vaccine is safe and immunogenic in adult and elderly patients in a randomized controlled trial. <i>Clin Vaccine Immunol.</i> 2012;19(3):313-318. doi:10.1128/CVI.05619-11                                                                                                                                                                                                                                                                                 | exclude - dose-sparing but vaccine not of interest                       |
| 3  | Treanor J, Keitel W, Belshe R, et al. Evaluation of a single dose of half strength inactivated influenza vaccine in healthy adults. <i>Vaccine.</i> 2002;20(7-8):1099-1105. doi:10.1016/s0264-410x(01)00440-6                                                                                                                                                                                                                                                                                                                       | exclude - dose-sparing but vaccine not of interest                       |
| 4  | Euctr. A Randomized, Active Controlled, Double-blind, Multi-Centre Study to Evaluate Safety and Immunogenicity of One Dose of FLUVAL AB-like (Trivalent, Whole Virus, Aluminium Phosphate Gel Adjuvanted) Influenza Vaccine Containing 6µgHA of Seasonal A/H1N1, A/H3N2 and B Influenza Antigens in Non-elderly Adult and Elderly Subjects. 2011. Available from: <a href="http://www.who.int/trialsearch/Trial2.aspx?TrialID=EUCTR2011-003314-16-HU">http://www.who.int/trialsearch/Trial2.aspx?TrialID=EUCTR2011-003314-16-HU</a> | exclude - dose-sparing but experimental vaccine                          |
| 5  | Euctr, E. S. Clinical study to compare the safety of two influenza vaccines in children and adolescents of 3 to less than 18 years of age at risk for influenza-related complications. 2013. Available from: <a href="http://www.who.int/trialsearch/Trial2.aspx?TrialID=EUCTR2013">http://www.who.int/trialsearch/Trial2.aspx?TrialID=EUCTR2013</a>                                                                                                                                                                                | exclude - dose-sparing but experimental vaccine                          |
| 6  | Pillet S, Aubin É, Trépanier S, et al. A plant-derived quadrivalent virus like particle influenza vaccine induces cross-reactive antibody and T cell response in healthy adults. <i>Clin Immunol.</i> 2016;168:72-87. doi:10.1016/j.clim.2016.03.008                                                                                                                                                                                                                                                                                | exclude - dose-sparing but experimental vaccine                          |
| 7  | Lee JH, Cho HK, Kim KH, et al. Evaluation of Waning Immunity at 6 Months after Both Trivalent and Quadrivalent Influenza Vaccination in Korean Children Aged 6-35 Months. <i>J Korean Med Sci.</i> 2019;34(46):e279. Published 2019 Dec 2. doi:10.3346/jkms.2019.34.e279                                                                                                                                                                                                                                                            | exclude - dose-sparing but experimental vaccine                          |
| 8  | Treanor JJ, Taylor DN, Tussey L, et al. Safety and immunogenicity of a recombinant hemagglutinin influenza-flagellin fusion vaccine (VAX125) in healthy young adults. <i>Vaccine.</i> 2010;28(52):8268-8274. doi:10.1016/j.vaccine.2010.10.009                                                                                                                                                                                                                                                                                      | exclude - dose-sparing but experimental vaccine                          |
| 9  | Vajo Z, Balaton G, Vajo P, Kalabay L, Erdman A, Torzsa P. Dose sparing and the lack of a dose-response relationship with an influenza vaccine in adult and elderly patients - a randomized, double-blind clinical trial. <i>Br J Clin Pharmacol.</i> 2017;83(9):1912-1920. doi:10.1111/bcp.13289                                                                                                                                                                                                                                    | exclude - dose-sparing but vaccine not of interest                       |
| 10 | Ctri. Study of a Single Dose or Two Doses of a Quadrivalent Influenza Vaccine in Subjects Aged 6 Months or Older in India. 2015. Available from: <a href="http://www.who.int/trialsearch/Trial2.aspx?TrialID=CTRI">http://www.who.int/trialsearch/Trial2.aspx?TrialID=CTRI</a>                                                                                                                                                                                                                                                      | exclude - dose-sparing but unclear vaccine (waiting for author response) |
| 11 | Euctr, F. I. Safety and Immunogenicity of the Quadrivalent Influenza Vaccine Administered via the Intramuscular Route in Children Aged 3 to 8 Years. 2011. Available from: <a href="http://www.who.int/trialsearch/Trial2.aspx?TrialID=EUCTR2011">http://www.who.int/trialsearch/Trial2.aspx?TrialID=EUCTR2011</a>                                                                                                                                                                                                                  | exclude - dose-sparing but unclear vaccine (waiting for author response) |
| 12 | Euctr, C. Z. A randomized, double-blind, placebo-controlled, multi-country and multi-center, phase IV study to demonstrate the efficacy of GSK Biologicals' influenza vaccine (Fluarix[TM])                                                                                                                                                                                                                                                                                                                                         | exclude - dose-sparing but unclear vaccine (waiting for author response) |

1  
2  
3  
4  
5  
6  
7  
8  
9  
10  
11  
12  
13  
14  
15  
16  
17  
18  
19  
20  
21  
22  
23  
24  
25  
26  
27  
28  
29  
30  
31  
32  
33  
34  
35  
36  
37  
38  
39  
40  
41  
42  
43  
44  
45  
46  
47  
48  
49  
50  
51  
52  
53  
54  
55  
56  
57  
58  
59  
60

|                                                                                                                                                                                                                           |  |
|---------------------------------------------------------------------------------------------------------------------------------------------------------------------------------------------------------------------------|--|
| administered intramuscularly in adults. - FluarixUS-006. 2006.<br>Available from: <a href="http://www.who.int/trialsearch/Trial2.aspx?TrialID=EUCTR2006">http://www.who.int/trialsearch/Trial2.aspx?TrialID=EUCTR2006</a> |  |
|---------------------------------------------------------------------------------------------------------------------------------------------------------------------------------------------------------------------------|--|

For peer review only

## APPENDIX 6 – Study and patient data

| Author, Year [Study design]     | Study period; Setting and Country                                                                                                                     | Objective of study                                                                                                                   | Eligibility criteria                                                                                                                                                                                                                                                                                                                                                                                                                                                                                                                                                                                 | Sample size; % Female, % previously immunized | Ethnicities                                                                                                                                                                                                   |
|---------------------------------|-------------------------------------------------------------------------------------------------------------------------------------------------------|--------------------------------------------------------------------------------------------------------------------------------------|------------------------------------------------------------------------------------------------------------------------------------------------------------------------------------------------------------------------------------------------------------------------------------------------------------------------------------------------------------------------------------------------------------------------------------------------------------------------------------------------------------------------------------------------------------------------------------------------------|-----------------------------------------------|---------------------------------------------------------------------------------------------------------------------------------------------------------------------------------------------------------------|
| Kramer, 2006 [RCT] <sup>1</sup> | October 2004 – November 2004;<br>760-bed tertiary care community teaching hospital in the USA                                                         | To compare the effectiveness of half-dose versus full dose TIV in health care workers                                                | Age 18 years or older, hospital employee, staff member, or volunteer, and signed informed consent and authorization to use and disclose protected health information for research purposes                                                                                                                                                                                                                                                                                                                                                                                                           | 444;<br>NR,<br>NR                             | NR                                                                                                                                                                                                            |
| Belshe, 2007 [RCT] <sup>2</sup> | USA;<br>NR                                                                                                                                            | To compare the immunogenicity and safety of injection of IM and ID TIV across different dose levels (3, 6, 9, and 15µg/antigen/dose) | Healthy adults 18-49 years of age                                                                                                                                                                                                                                                                                                                                                                                                                                                                                                                                                                    | 125;<br>71.2%,<br>0%                          | American Indian/Alaskan Native (0%), Asian (2.4%), Black/African American (9.6%), Hawaiian/Pacific Islander (0%), Hispanic (0%), Multi-racial (0.8%), Non-Hispanic (97.6%), Other/unknown (0%), White (87.2%) |
| Engler, 2008 [RCT] <sup>3</sup> | November 2004 – December 2004;<br>Allergy-Immunology-Immunization Clinic, WRAMC, and Pentagon/DiLorenzo Health Clinic, Arlington, Virginia in the USA | To determine the effects of age, sex, and dose on the immunogenicity of intramuscular TIV                                            | Healthy adults aged 18-64 years. Inclusion criteria were based on the remaining CDC and/or DoD priority prior to the shortage announcement which includes all children aged 6--23 months; adults aged >65 years; persons aged 2--64 years with underlying chronic medical conditions; all women who will be pregnant during the influenza season; residents of nursing homes and long-term--care facilities; children aged 2--18 years on chronic aspirin therapy; health-care workers involved in direct patient care; and out-of-home caregivers and household contacts of children aged <6 months | 1316;<br>43.4%,<br>0%                         | African American (9%), Asian (2%), Hispanic (2%), Other/unknown (1.4%), White (85%)                                                                                                                           |
|                                 | August 2007-2008;<br>Seattle Division of the Department of                                                                                            | To determine pre vaccination and 4- week post-vaccination changes in antibody titer, and                                             | Community-dwelling adults 65 years and older living in Puget Sound area in Washington State                                                                                                                                                                                                                                                                                                                                                                                                                                                                                                          | 129;<br>17.8%,<br>94.6%                       | African American (4.7%), Asian (1.6%), Hispanic (0.8%), Not reported                                                                                                                                          |

| Author, Year [Study design]         | Study period; Setting and Country                                                                           | Objective of study                                                                                                                                                                                                                            | Eligibility criteria                                                                                                                                                                                                                                                                             | Sample size; % Female, % previously immunized | Ethnicities                                                                                                                                                                                                                       |
|-------------------------------------|-------------------------------------------------------------------------------------------------------------|-----------------------------------------------------------------------------------------------------------------------------------------------------------------------------------------------------------------------------------------------|--------------------------------------------------------------------------------------------------------------------------------------------------------------------------------------------------------------------------------------------------------------------------------------------------|-----------------------------------------------|-----------------------------------------------------------------------------------------------------------------------------------------------------------------------------------------------------------------------------------|
| Chi, 2010 [RCT] <sup>4</sup>        | Veterans Affairs Puget Sound Health Care System in Washington State, USA.                                   | local and systemic reactions of full-dose compared to 60% dose of TIV by IM injection                                                                                                                                                         |                                                                                                                                                                                                                                                                                                  |                                               | (2.3%), Other (0.8%), White (90%)                                                                                                                                                                                                 |
| Cioppa, 2011 [RCT] <sup>5</sup>     | October 2008 – March 2009; 10 study centers in Finland and 5 centers in Belgium                             | To evaluate the safety, tolerability and immunogenicity of different vaccine formulations with different doses of MF59 adjuvant and/or a second B strain (QIV) when added to either high or low doses of a purified subunit influenza vaccine | Healthy children aged 6 to <36 months                                                                                                                                                                                                                                                            | 126; 43.5%, NR                                | Asian (1.68%), Black (6.54%), White (84.2%)                                                                                                                                                                                       |
| Skowronski, 2011 [RCT] <sup>6</sup> | September 2008 – December 2008; 5 sites in 3 Canadian provinces (British Columbia, Quebec, and Nova Scotia) | To determine whether giving 2 full doses of split TIV to previously unimmunized infants and toddlers can improve immunogenicity without increasing reactogenicity compared with 2 half-doses                                                  | Healthy children 6–23 months of age                                                                                                                                                                                                                                                              | 267; 53.2%, 0%                                | Asian (7.9%), Other (14.3%), White (77.8%)                                                                                                                                                                                        |
| Langley, 2012 [RCT] <sup>7</sup>    | November 2008 – August 2009; 17 centers in Canada                                                           | To assess the immunogenicity and safety of a preservative-free, prefilled syringe formulation of TIV provided as the full adult dose of 0.50 mL compared with the usual children's dose of 0.25 mL in young children                          | Healthy children 6–35 months at the time of vaccination                                                                                                                                                                                                                                          | 390; 47.9%, 42.6%                             | Other (13.9%), White (86.1%)                                                                                                                                                                                                      |
| Pavia-Ruz, 2015 [RCT] <sup>8</sup>  | October 2008 – March 2009; Hong Kong, Mexico, Taiwan, Thailand, and the USA                                 | To evaluate Fluarix at both the standard recommended TIV dose for young children in the US (0.25 ml) and also at double this dose (0.5 ml)                                                                                                    | Healthy children aged 6 to 35 months at the time of the first vaccination; without acute illness at the time of enrollment and who had not been vaccinated during the 2008-2009 influenza season. Administration of influenza vaccine in a previous season was not however an exclusion criteria | 3318; 51%, 30.1%                              | African heritage/African American (3.5%), American Indian or Alaskan native (0.1%), Asian-Central/South Asian heritage (0.1%), Asian-East Asian heritage (14.5%), Asian-Japanese heritage (0.1%), Asian-South East Asian heritage |

| Author, Year [Study design]     | Study period; Setting and Country                                | Objective of study                                                                                                                                                                                                                                                                                                                                                                                   | Eligibility criteria                                                                                                                                                                                                                                                                                                                                                                                                               | Sample size; % Female, % previously immunized | Ethnicities                                                                                                                                                                                     |
|---------------------------------|------------------------------------------------------------------|------------------------------------------------------------------------------------------------------------------------------------------------------------------------------------------------------------------------------------------------------------------------------------------------------------------------------------------------------------------------------------------------------|------------------------------------------------------------------------------------------------------------------------------------------------------------------------------------------------------------------------------------------------------------------------------------------------------------------------------------------------------------------------------------------------------------------------------------|-----------------------------------------------|-------------------------------------------------------------------------------------------------------------------------------------------------------------------------------------------------|
|                                 |                                                                  |                                                                                                                                                                                                                                                                                                                                                                                                      |                                                                                                                                                                                                                                                                                                                                                                                                                                    |                                               | (9.2%), Native Hawaiian or other Pacific Islander (0.2%), White - Arabic/North African heritage (0.5%), White-Caucasian/European heritage (29.9%), Hispanics and children of mixed race (42.1%) |
| Halasa, 2015 [RCT] <sup>9</sup> | 2010-2012; 6 study sites in USA                                  | To determine whether a higher dose of influenza vaccine would be safe in the 6 through 35 months age group. In addition, to determine whether immunization with 0.5 mL doses of TIV (15 µg of each HA) would improve the immunogenicity without increasing the reactogenicity of TIV when administered to children 6 through 35 months of age with and without a history of previous TIV vaccination | Healthy children 6 to 35 months of age (naïve cohort) or 12 through 35 months of age (fully primed cohort) who were available for the entire study period and whose parents or guardians provided informed consent were eligible to participate. Children who were eligible in the fully primed cohort also required a history of receiving 2 doses of 2009–2010 H1N1 influenza vaccine and 2 doses of TIV at any time in the past | 243; 52%, 13.2%                               | African (26%), Asian (1%), Multiracial (5%), other (0%); Ethnicity: Hispanic (2%), Non-Hispanic (98%), White (67%)                                                                              |
| Phung, 2016 [RCT] <sup>10</sup> | September 2010-January 2011; Finland                             | To evaluate the immunogenicity and safety following a single intramuscular dose of FLUAD or Agrippal S1 influenza vaccines in healthy children previously vaccinated                                                                                                                                                                                                                                 | Healthy children 6–35 months at the time of vaccination                                                                                                                                                                                                                                                                                                                                                                            | 197; 55.8%, 85.7%                             | NR                                                                                                                                                                                              |
| Jain, 2017 [RCT] <sup>11</sup>  | 2014-2015 influenza season; 66 study locations in USA and Mexico | To compare the safety and immunogenicity of a double-dose IIV4 manufactured by GSK Vaccines with the United States-approved standard-dose IIV4 in children 6–35 months of age                                                                                                                                                                                                                        | Healthy children aged 6-35 months regardless of influenza vaccination history, but could not have received any seasonal or pandemic influenza vaccine within 6 months before the first dose of study vaccine                                                                                                                                                                                                                       | 2424; 46.9%, 57.5%                            | African/African American (13.9%), American Indian or Alaskan Native (2.0%), Caucasian (64.3%), Other (17.9%), South East Asian (1.8%)                                                           |
| Ojeda, 2019 [RCT] <sup>12</sup> | December 2017 – January 2018; 3 study sites in Mexico            | Reported the results of an open-label, randomized phase III study designed to evaluate the immunogenicity and safety                                                                                                                                                                                                                                                                                 | Children aged 6 months to 17 years of age                                                                                                                                                                                                                                                                                                                                                                                          | 302; 46.4%, NR                                | NR                                                                                                                                                                                              |

| Author,<br>Year<br>[Study<br>design]      | Study period;<br>Setting and Country                   | Objective<br>of study                                                                                                                                                                                                                                                                                                                       | Eligibility<br>criteria                                                                                                                                                                                                                                    | Sample size;<br>% Female,<br>% previously<br>immunized | Ethnicities                                                                                                                                                                                                                               |
|-------------------------------------------|--------------------------------------------------------|---------------------------------------------------------------------------------------------------------------------------------------------------------------------------------------------------------------------------------------------------------------------------------------------------------------------------------------------|------------------------------------------------------------------------------------------------------------------------------------------------------------------------------------------------------------------------------------------------------------|--------------------------------------------------------|-------------------------------------------------------------------------------------------------------------------------------------------------------------------------------------------------------------------------------------------|
| Robertson,<br>2019<br>[RCT] <sup>13</sup> | September 2016 –<br>March 2017;<br>38 sites in the USA | of this thiomersal containing<br>MDV format of QIV compared<br>to the licensed thiomersal-free,<br>single-dose PFS format in<br>children and adolescents<br><br>To compare the safety and<br>immunogenicity of full and half<br>doses of quadrivalent, split-<br>virion, inactivated influenza<br>vaccine in children 6–35<br>months of age | Healthy children 6–35 months of age<br>who had not been vaccinated against<br>influenza during the current season<br>(2016–2017). Children 6–11 months<br>of age had to be born at full term of<br>pregnancy (≥37 weeks) or with a birth<br>weight ≥2.5 kg | 1950;<br>49.7%,<br>47.3%                               | Race: American Indian or<br>Alaska Native (0.98%),<br>Asian (0.46%), Black<br>(19.2%), Native Hawaiian<br>or Other Pacific Islander<br>(0.46%), White (74.3%),<br>Ethnicity: Hispanic or<br>Latino (22%), not Hispanic<br>or Latino (77%) |

**Abbreviations:** CDC- Centers for Disease Control and Prevention; DoD- Department of Defense; GSK -GlaxoSmithKline; HA- hemagglutinin; IIV4 – inactivated influenza vaccine; ID - intradermal; IM - intramuscular; MDV- multi-dose vial; PFS – pre-filled syringe; QIV-quadrivalent influenza vaccine; TIV-trivalent influenza vaccine; NR – not reported

**APPENDIX 7 – Treatment and outcome data**

| Author, Year; [Study design] Population                               | Treatment arms<br>Brand name (manufacturer), HA/strain [dosing (administration)] Included strains                                                                                                                                                                                                                                                                                                                                                      | Effectiveness and Safety<br>Outcome (definition): n/N (unless otherwise indicated)                                                                                                                                                                                                                                                                                                                                                                                                                                                                                                                                                                                                                                                                                                                                                                                                                               | Conclusions                                                                                                                                                                                                                                                                                                                                                                                                    |
|-----------------------------------------------------------------------|--------------------------------------------------------------------------------------------------------------------------------------------------------------------------------------------------------------------------------------------------------------------------------------------------------------------------------------------------------------------------------------------------------------------------------------------------------|------------------------------------------------------------------------------------------------------------------------------------------------------------------------------------------------------------------------------------------------------------------------------------------------------------------------------------------------------------------------------------------------------------------------------------------------------------------------------------------------------------------------------------------------------------------------------------------------------------------------------------------------------------------------------------------------------------------------------------------------------------------------------------------------------------------------------------------------------------------------------------------------------------------|----------------------------------------------------------------------------------------------------------------------------------------------------------------------------------------------------------------------------------------------------------------------------------------------------------------------------------------------------------------------------------------------------------------|
| Kramer, 2006 [RCT] <sup>1</sup><br><br>Adults and Seniors (>18 years) | <p>Fluzone (Aventis Pasteur), <b>15-µg/strain</b> [1 x 0.5mL dose (Intramuscular into the deltoid region)]</p> <p><i>A/Wyoming/3/2003 (H3N2), A/New Caledonia/20/99 (H1N1), and a new B strain, B/Jiangsu/10/2003</i></p> <p>Fluzone (Aventis Pasteur), <b>7.5-µg/strain</b> [1 x 0.25 mL dose (Intramuscular into the deltoid region)]</p> <p><i>A/Wyoming/3/2003 (H3N2), A/New Caledonia/20/99 (H1N1), and a new B strain, B/Jiangsu/10/2004</i></p> | <p><b>Effectiveness</b><br/><i>Lab confirmed influenza</i> (Laboratory confirmation of influenza diagnosis was sought in participants reporting a clinical diagnosis by their physicians): 1/222</p> <p><i>Influenza like illness</i> (Clinical diagnosis of influenza. Participants self-reported four or more symptoms consistent with influenza-like illness (i.e., headache, extreme tiredness, dry cough, fever, muscle or body aches)): 8/222</p> <p><b>Effectiveness</b><br/><i>Lab confirmed influenza</i> (Laboratory confirmation of influenza diagnosis was sought in participants reporting a clinical diagnosis by their physicians): 0/222</p> <p><i>Influenza like illness</i> (Clinical diagnosis of influenza. Participants self-reported four or more symptoms consistent with influenza-like illness (i.e., headache, extreme tiredness, dry cough, fever, muscle or body aches)): 15/222</p> | <ul style="list-style-type: none"> <li>There was no significant difference between the full-dose and half-dose groups in the diagnosis of influenza or in the proportion of participants self-reporting four or more symptoms consistent with influenza-like illness.</li> <li>No adverse events were noted by participants from either group or reported to the IRB during the course of the study</li> </ul> |
| Belshe, 2007 [RCT] <sup>2</sup><br><br>Adults (18-49 years)           | <p>Fluzone (Sanofi-Pasteur), <b>15-µg/strain</b> [1 x 0.5mL dose (Intramuscular in the non-dominant arm)]</p> <p>Fluzone (Sanofi-Pasteur), <b>9-µg/strain</b> [1 x 0.3mL dose (Intramuscular in the non-dominant arm)]</p>                                                                                                                                                                                                                             | <p><b>Reactogenicity – injection site</b><br/><i>Pain</i><sup>1</sup>: 15/31<br/><i>Redness</i><sup>2</sup>: 8/31<br/><i>Swelling</i><sup>2</sup>: 7/31</p> <p><b>Reactogenicity – systemic</b><br/><i>Fever</i><sup>3</sup>: 1/31<br/><i>Headache</i><sup>1</sup>: 15/31<br/><i>Malaise</i><sup>1</sup>: 8/31<br/><i>Myalgia</i><sup>1</sup>: 10/31</p> <p><b>Reactogenicity – injection site</b><br/><i>Pain</i><sup>1</sup>: 11/31<br/><i>Redness</i><sup>2</sup>: 11/31<br/><i>Swelling</i><sup>2</sup>: 4/31</p> <p><b>Reactogenicity – systemic</b><br/><i>Fever</i><sup>3</sup>: 1/31<br/><i>Headache</i><sup>1</sup>: 6/31</p>                                                                                                                                                                                                                                                                           | <ul style="list-style-type: none"> <li>Intradermal vaccine induced significantly more local inflammatory response than Intramuscular vaccine (primary comparison of this study was ID vs IM doses)</li> </ul>                                                                                                                                                                                                  |



| Author,<br>Year;<br>[Study<br>design]<br>Population                              | Treatment arms<br>Brand name (manufacturer),<br>HA/strain [dosing (administration)]<br>Included strains                                                                                             | Effectiveness and Safety<br>Outcome (definition):<br>n/N (unless otherwise indicated)                                                                                                                                                                                                                                                                                                                                                                                                                                                                                                                                      | Conclusions                                                                                                                                                                                                                                                                                                                                                                                                                                                                                               |
|----------------------------------------------------------------------------------|-----------------------------------------------------------------------------------------------------------------------------------------------------------------------------------------------------|----------------------------------------------------------------------------------------------------------------------------------------------------------------------------------------------------------------------------------------------------------------------------------------------------------------------------------------------------------------------------------------------------------------------------------------------------------------------------------------------------------------------------------------------------------------------------------------------------------------------------|-----------------------------------------------------------------------------------------------------------------------------------------------------------------------------------------------------------------------------------------------------------------------------------------------------------------------------------------------------------------------------------------------------------------------------------------------------------------------------------------------------------|
|                                                                                  | <p>Fluzone (Sanofi-Pasteur),<br/><b>6-µg/strain</b> [1 x 0.2mL dose (Intramuscular in the non-dominant arm)]</p>                                                                                    | <p><i>Malaise</i><sup>1</sup>: 8/31<br/><i>Myalgia</i><sup>1</sup>: 6/31</p> <p><b>Reactogenicity – injection site</b><br/><i>Pain</i><sup>1</sup>: 14/31<br/><i>Redness</i><sup>2</sup>: 9/31<br/><i>Swelling</i><sup>2</sup>: 4/31</p> <p><b>Reactogenicity – systemic</b><br/><i>Fever</i><sup>3</sup>: 0/31<br/><i>Headache</i><sup>1</sup>: 9/31<br/><i>Malaise</i><sup>1</sup>: 7/31<br/><i>Myalgia</i><sup>1</sup>: 9/31</p>                                                                                                                                                                                        |                                                                                                                                                                                                                                                                                                                                                                                                                                                                                                           |
|                                                                                  | <p>Fluzone (Sanofi-Pasteur),<br/><b>3-µg/strain</b> [1 x 0.1mL dose (Intramuscular in the non-dominant arm)]</p>                                                                                    | <p><b>Reactogenicity – injection site</b><br/><i>Pain</i><sup>1</sup>: 15/31<br/><i>Redness</i><sup>2</sup>: 9/31<br/><i>Swelling</i><sup>2</sup>: 7/31</p> <p><b>Reactogenicity – systemic</b><br/><i>Fever</i><sup>3</sup>: 3/31<br/><i>Headache</i><sup>1</sup>: 8/31<br/><i>Malaise</i><sup>1</sup>: 3/31<br/><i>Myalgia</i><sup>1</sup>: 7/31</p>                                                                                                                                                                                                                                                                     |                                                                                                                                                                                                                                                                                                                                                                                                                                                                                                           |
| <p>Engler, 2008<br/>[RCT]<sup>3</sup></p> <p><i>Adults</i><br/>(18-64 years)</p> | <p>Fluzone (Aventis Pasteur),<br/><b>15-µg/strain</b> [1 x 0.5mL dose (Intramuscular injection)]</p> <p><i>A/H1N1, A/New Caledonia/20/99; A/H3N2, A/Fujian/411/2002; B, B/Shanghai/361/2002</i></p> | <p><b>Effectiveness</b><br/><i>Influenza like illness</i> (Influenza-like illness and complications resulting in either inpatient or outpatient medical encounters were compared between dose groups (by age)): 61/632</p> <p><i>Hospitalization or Emergency visits</i>: 0.3%</p> <p><b>Reactogenicity – local/injection site</b><br/><i>Any local reactions</i> (NR): 8.9%<br/><i>Arm weakness</i> (NR): 8.3%<br/><i>Numbness or burning</i> (NR): 9.7%<br/><i>Pain</i> (NR): 5.9%<br/><i>Redness or swelling</i> (NR): 13.4%</p> <p><b>Reactogenicity – systemic</b><br/><i>Joint and/or muscle pain</i> (NR): 4.5%</p> | <ul style="list-style-type: none"> <li>▪ The relative risk of medical visits and hospitalizations for influenza-like illnesses were similar in the half- and full-dose group regardless of age, and there was no evidence of ILI symptom differences by sex or dose during the 21 days after immunizations.</li> <li>▪ Although injection site pain was greater for full vs half dose (19.9% vs 14.4%; p=.01), when analyzed for clinically significant pain levels significant dose-dependent</li> </ul> |

| Author, Year; [Study design] Population                          | Treatment arms<br>Brand name (manufacturer), HA/strain [dosing (administration)]<br>Included strains                                                                                                                 | Effectiveness and Safety<br>Outcome (definition):<br>n/N (unless otherwise indicated)                                                                                                                                                                                                                                                                                                                                                                                                                                                                                                                                                                                                                                                                                           | Conclusions                                                                                                                                                                                                                                                  |
|------------------------------------------------------------------|----------------------------------------------------------------------------------------------------------------------------------------------------------------------------------------------------------------------|---------------------------------------------------------------------------------------------------------------------------------------------------------------------------------------------------------------------------------------------------------------------------------------------------------------------------------------------------------------------------------------------------------------------------------------------------------------------------------------------------------------------------------------------------------------------------------------------------------------------------------------------------------------------------------------------------------------------------------------------------------------------------------|--------------------------------------------------------------------------------------------------------------------------------------------------------------------------------------------------------------------------------------------------------------|
|                                                                  | <p>Fluzone (Aventis Pasteur),<br/><b>7.5-µg/strain</b> [1 x 0.25 mL dose (Intramuscular injection)]</p> <p><i>A/H1N1, A/New Caledonia/20/99; A/H3N2, A/Fujian/411/2002; B, B/Shanghai/361/2003</i></p>               | <p><b>Adverse events</b><br/>SAE: 2/554</p> <p><b>Effectiveness</b><br/><i>Influenza like illness</i> (Influenza-like illness and complications resulting in either inpatient or outpatient medical encounters were compared between dose groups (by age): 64/644</p> <p><i>Hospitalization or Emergency visits</i>: 0.2%</p> <p><b>Reactogenicity – local/injection site</b><br/><i>Any local reactions</i> (NR): 7.5%<br/><i>Arm weakness</i> (NR): 6.5%<br/><i>Numbness or burning</i> (NR): 7.8%<br/><i>Pain</i> (NR): 4.6%<br/><i>Redness or swelling</i> (NR): 8.6%</p> <p><b>Reactogenicity – systemic</b><br/><i>Joint and/or muscle pain</i> (NR): 2.2%</p> <p><b>Adverse events</b><br/>SAE: 1/556</p>                                                                | <p>pain differences were not identified.</p> <ul style="list-style-type: none"> <li>Joint and/or muscle pain were significantly different (p=.02 and p=.03, respectively) by dose.</li> <li>No other adverse event differed significantly by dose</li> </ul> |
| <p>Chi, 2010 [RCT]<sup>4</sup></p> <p>Seniors (&gt;65 years)</p> | <p>Fluzone (Sanofi Pasteur),<br/><b>15-µg/strain</b> [1 x 0.5mL dose (intramuscular in deltoid of arm)]</p> <p><i>A/Solomon Islands/3/ 2006 (A/H1N1), A/Wisconsin/67/2005 (A/H3N2), and B/Malaysia/2506/2004</i></p> | <p><b>Reactogenicity – injection site, N=64</b><br/><i>Arm motion limitation</i>: 1 (grade I)<sup>4</sup><br/><i>Itching</i>: 4 (grade I)<sup>4</sup><br/><i>Pain</i>: 7 (grade I)<sup>4</sup><br/><i>Redness or discoloration</i>: 9 (grade I)<sup>4</sup><br/><i>Swelling</i>: 13 (grade I)<sup>4</sup></p> <p><b>Reactogenicity - systemic, N=64</b><br/><i>Chills</i>: 1 (grade I)<sup>4</sup>, 1 (grade II/III)<sup>5</sup><br/><i>Fatigue</i>: 4 (grade I)<sup>4</sup>, 2 (grade II/III)<sup>5</sup><br/><i>Fever</i>: 0<br/><i>General body ache/pain</i>: 6 (grade I)<sup>4</sup>, 1 (grade II/III)<sup>5</sup><br/><i>Headache</i>: 10 (grade I)<sup>4</sup><br/><i>Nausea</i>: 3 (grade I)<sup>4</sup>, 1 (grade II/III)<sup>5</sup></p> <p><b>Adverse events</b></p> | <ul style="list-style-type: none"> <li>The two SAEs were acute coronary syndrome and appendicitis and neither were judged to be related to influenza vaccination</li> </ul>                                                                                  |

| Author,<br>Year;<br>[Study<br>design]<br>Population                                                     | Treatment arms<br>Brand name (manufacturer),<br>HA/strain [dosing (administration)]<br>Included strains                                                                                                                                                                                                                                                                                                                                                                                                                                                                                                                                                                                                                                                                                                           | Effectiveness and Safety<br><i>Outcome</i> (definition):<br>n/N (unless otherwise indicated)                                                                                                                                                                                                                                                                                                                                                                                                                                                                                                                                                                                                                                                                                                                                                                                              | Conclusions                                                                                                                                                                                                                                                                                                                  |
|---------------------------------------------------------------------------------------------------------|-------------------------------------------------------------------------------------------------------------------------------------------------------------------------------------------------------------------------------------------------------------------------------------------------------------------------------------------------------------------------------------------------------------------------------------------------------------------------------------------------------------------------------------------------------------------------------------------------------------------------------------------------------------------------------------------------------------------------------------------------------------------------------------------------------------------|-------------------------------------------------------------------------------------------------------------------------------------------------------------------------------------------------------------------------------------------------------------------------------------------------------------------------------------------------------------------------------------------------------------------------------------------------------------------------------------------------------------------------------------------------------------------------------------------------------------------------------------------------------------------------------------------------------------------------------------------------------------------------------------------------------------------------------------------------------------------------------------------|------------------------------------------------------------------------------------------------------------------------------------------------------------------------------------------------------------------------------------------------------------------------------------------------------------------------------|
|                                                                                                         | <p>Fluzone (Sanofi Pasteur),<br/><b>9-µg/strain</b> [1 x 0.3mL dose (intramuscular in deltoid of arm)]</p> <p><i>A/Solomon Islands/3/2006 (A/H1N1),<br/>A/Wisconsin/67/2005 (A/H3N2), and<br/>B/Malaysia/2506/2004</i></p>                                                                                                                                                                                                                                                                                                                                                                                                                                                                                                                                                                                        | <p>SAE<sup>6</sup>: 0/64</p> <p><b>Reactogenicity – injection site, N=64</b><br/><i>Arm motion limitation</i>: 1 (grade I)<sup>4</sup><br/><i>Itching</i>: 5 (grade I)<sup>4</sup><br/><i>Pain</i>: 11 (grade I)<sup>4</sup><br/><i>Redness or discoloration</i>: 7 (grade I)<sup>4</sup><br/><i>Swelling</i>: 4 (grade I)<sup>4</sup></p> <p><b>Reactogenicity - systemic, N=64</b><br/><i>Chills</i>: 1 (grade I)<sup>4</sup>, 1 (grade II/III)<sup>5</sup><br/><i>Fatigue</i>: 6 (grade I)<sup>4</sup>, 1 (grade II/III)<sup>5</sup><br/><i>Fever</i>: 1 (grade I)<sup>4</sup><br/><i>General body ache/pain</i>: 5 (grade I)<sup>4</sup>, 2 (grade II/III)<sup>5</sup><br/><i>Headache</i>: 5 (grade I)<sup>4</sup>, 1 (grade II/III)<sup>5</sup><br/><i>Nausea</i>: 2 (grade I)<sup>4</sup>, 1 (grade II/III)<sup>5</sup></p> <p><b>Adverse events</b><br/>SAE<sup>6</sup>: 2/64</p> |                                                                                                                                                                                                                                                                                                                              |
| <p>Cioppa,<br/>2011<br/>[RCT]<sup>5</sup></p> <p><i>Infants/<br/>Toddlers<br/>(6-36<br/>months)</i></p> | <p>NR - TIV,<br/><b>7.5-µg/strain</b> [2 x 0.25mL dose (intramuscular in deltoid of arm (children 24-35 mo of age) or the anterolateral aspect of the thigh (children &lt;24 mo of age) using prefilled syringes)]</p> <p><i>A/Brisbane/59/2007 (A/H1N1)-like virus,<br/>A/Brisbane/10/2007 (A/H3N2)-like virus, and<br/>B/Florida/4/2006-like virus (of the influenza<br/>B/Yamagata lineage)</i></p> <p>Agrippal - TIV,<br/><b>15-µg/strain</b> [2 x 0.5mL dose (intramuscular in deltoid of arm (children 24-35 mo of age) or the anterolateral aspect of the thigh (children &lt;24 mo of age) using prefilled syringes)]</p> <p><i>A/Brisbane/59/2007 (A/H1N1)-like virus,<br/>A/Brisbane/10/2007 (A/H3N2)-like virus, and<br/>B/Florida/4/2006-like virus (of the influenza<br/>B/Yamagata lineage)</i></p> | <p><b>Reactogenicity</b><br/><i>Any local reaction</i><sup>7</sup>: 47%<br/><i>Any systemic reaction</i><sup>8</sup>: 68%</p> <p><b>Adverse events</b><br/>AE (solicited/spontaneously reported): 84%<br/>SAE: 0/25</p> <p><b>Reactogenicity</b><br/><i>Any local reaction</i><sup>7</sup>: 59%<br/><i>Any systemic reaction</i><sup>8</sup>: 50%</p> <p><b>Adverse events</b><br/>AE (solicited/spontaneously reported): 82%<br/>SAE: 0/22</p>                                                                                                                                                                                                                                                                                                                                                                                                                                           | <ul style="list-style-type: none"> <li>▪ Reactogenicity of the 7.5-µg TIV/QIV formulations was slightly lower than for the corresponding 15-µg formulations.</li> <li>▪ The majority of unsolicited AEs were mild or moderate in severity and none of the SAEs was considered to be related to the study vaccine.</li> </ul> |

| Author, Year; [Study design] Population                                          | Treatment arms<br>Brand name (manufacturer), HA/strain [dosing (administration)]<br>Included strains                                                                                                                                                                                                                                                                                                                                        | Effectiveness and Safety<br>Outcome (definition):<br>n/N (unless otherwise indicated)                                                                                                                                                                                                                                      | Conclusions                                                                                                                                                                                                                                                                                                        |
|----------------------------------------------------------------------------------|---------------------------------------------------------------------------------------------------------------------------------------------------------------------------------------------------------------------------------------------------------------------------------------------------------------------------------------------------------------------------------------------------------------------------------------------|----------------------------------------------------------------------------------------------------------------------------------------------------------------------------------------------------------------------------------------------------------------------------------------------------------------------------|--------------------------------------------------------------------------------------------------------------------------------------------------------------------------------------------------------------------------------------------------------------------------------------------------------------------|
|                                                                                  | NR - QIV,<br><b>7.5-µg/strain</b> [2 x 0.25mL dose (intramuscular in deltoid of arm (children 24-35 mo of age) or the anterolateral aspect of the thigh (children <24 mo of age) using prefilled syringes)]<br><br><i>A/Brisbane/59/2007 (A/H1N1)-like virus, A/Brisbane/10/2007 (A/H3N2)-like virus, B/Florida/4/2006-like virus (of the influenza B/Yamagata lineage), and B/Malaysia/2506/2004-like antigen virus (Victoria lineage)</i> | <b>Reactogenicity</b><br><i>Any local reaction</i> <sup>7</sup> : 25%<br><i>Any systemic reaction</i> <sup>8</sup> : 50%<br><br><b>Adverse events</b><br>AE (solicited/spontaneously reported): 92%<br>SAE: 1/25                                                                                                           |                                                                                                                                                                                                                                                                                                                    |
|                                                                                  | NR - QIV,<br><b>15-µg/strain</b> [2 x 0.5mL dose (intramuscular in deltoid of arm (children 24-35 mo of age) or the anterolateral aspect of the thigh (children <24 mo of age) using prefilled syringes)]<br><br><i>A/Brisbane/59/2007 (A/H1N1)-like virus, A/Brisbane/10/2007 (A/H3N2)-like virus, B/Florida/4/2006-like virus (of the influenza B/Yamagata lineage), and B/Malaysia/2506/2004-like antigen virus (Victoria lineage)</i>   | <b>Reactogenicity</b><br><i>Any local reaction</i> <sup>7</sup> : 39%<br><i>Any systemic reaction</i> <sup>8</sup> : 54%<br><br><b>Adverse events</b><br>AE (solicited/spontaneously reported): 71%<br>SAE: 1/28                                                                                                           |                                                                                                                                                                                                                                                                                                                    |
|                                                                                  | Vaxigrip pediatric - TIV (Sanofi Pasteur), <b>7.5-µg/strain</b> [2 x 0.25mL dose (intramuscular in deltoid of arm (children 24-35 mo of age) or the anterolateral aspect of the thigh (children <24 mo of age) using prefilled syringes)]                                                                                                                                                                                                   | <b>Reactogenicity</b><br><i>Any local reaction</i> <sup>7</sup> : 50%<br><i>Any systemic reaction</i> <sup>8</sup> : 46%<br><br><b>Adverse events</b><br>AE (solicited/spontaneously reported): 73%<br>SAE: 1/26                                                                                                           |                                                                                                                                                                                                                                                                                                                    |
| Skowronski, 2011 [RCT] <sup>6</sup><br><br><i>Infants/Toddlers (6-23 months)</i> | Vaxigrip (Sanofi-Pasteur), <b>15-µg/strain [2 x 0.5mL dose]</b> (Intramuscular injection)<br><br><i>A/Brisbane/10/07 (H3N2); A/Brisbane/59/07 (H1N1); and B/Florida/4/06 (Yamagata lineage)</i>                                                                                                                                                                                                                                             | <b>Reactogenicity – injection site</b><br><i>Induration</i> (NR): 13.7%<br><i>Redness</i> (NR): 22.6%<br><i>Swelling</i> (NR): 15.3%<br><i>Tenderness</i> (NR): 22.6%<br><br><b>Reactogenicity – systemic</b><br><i>Fever</i> (>37.5°C): 8.06%<br><i>Irritability</i> (NR): 59.7%<br><i>Decreased appetite</i> (NR): 38.7% | <ul style="list-style-type: none"> <li>▪ Local reactions generally were less common in infants than toddlers and more common with full doses versus half doses, but none of these differences were significant.</li> <li>▪ One serious adverse event was reported: a toddler in the half dose group was</li> </ul> |

| Author,<br>Year;<br>[Study<br>design]<br>Population                                                      | Treatment arms<br>Brand name (manufacturer),<br>HA/strain [dosing (administration)]<br>Included strains                                                                                                                                                                                                                                                                    | Effectiveness and Safety<br><i>Outcome</i> (definition):<br>n/N (unless otherwise indicated)                                                                                                                                                                                                                                                                                                                                                                                                                                                                                        | Conclusions                                                                                                                                                                                                                                                                                                                                                                                                                                                                                                                                                                                                                                                                                                                                     |
|----------------------------------------------------------------------------------------------------------|----------------------------------------------------------------------------------------------------------------------------------------------------------------------------------------------------------------------------------------------------------------------------------------------------------------------------------------------------------------------------|-------------------------------------------------------------------------------------------------------------------------------------------------------------------------------------------------------------------------------------------------------------------------------------------------------------------------------------------------------------------------------------------------------------------------------------------------------------------------------------------------------------------------------------------------------------------------------------|-------------------------------------------------------------------------------------------------------------------------------------------------------------------------------------------------------------------------------------------------------------------------------------------------------------------------------------------------------------------------------------------------------------------------------------------------------------------------------------------------------------------------------------------------------------------------------------------------------------------------------------------------------------------------------------------------------------------------------------------------|
|                                                                                                          | <p>Vaxigrip (Sanofi-Pasteur),<br/>15-µg/strain [2 x 0.25mL dose (Intramuscular<br/>injection)]</p> <p><i>A/Brisbane/10/07 (H3N2); A/Brisbane/59/07 (H1N1);<br/>and B/Florida/4/06 (Yamagata lineage)</i></p>                                                                                                                                                               | <p><i>Drowsiness</i> (NR): 39.5%<br/><i>Sleep disturbance</i> (NR): 54.8%</p> <p><b>Adverse events</b><br/>SAE: NR</p> <p><b>Reactogenicity – injection site</b><br/><i>Induration</i> (NR): 6.3%<br/><i>Redness</i> (NR): 20.3%<br/><i>Swelling</i> (NR): 8.6%<br/><i>Tenderness</i> (NR): 25.8%</p> <p><b>Reactogenicity – systemic</b><br/><i>Fever (&gt;37.5°C)</i>: 11.7%<br/><i>Irritability</i> (NR): 60.2%<br/><i>Decreased appetite</i> (NR): 43%<br/><i>Drowsiness</i> (NR): 41.4%<br/><i>Sleep disturbance</i> (NR): 50%</p> <p><b>Adverse events</b><br/>SAE: 1/128</p> | <p>hospitalized with pneumonia<br/>28 days after the first<br/>vaccination. The event was<br/>deemed unlikely related to the<br/>vaccine.</p> <ul style="list-style-type: none"> <li>All of the rate differences were significantly below the allowed 10% increase in reactogenicity for the full dose (<math>p &lt; 0.001</math> for infant and combined analyses, <math>p &lt; .005</math> for toddlers).</li> <li>This randomized controlled trial in infants and toddlers shows that compared with 0.25-mL half-dosing, administration of 2 full 0.5-mL doses of trivalent inactivated influenza vaccine can increase antibody response without increasing reactogenicity in previously unimmunized infants aged 6 to 11 months.</li> </ul> |
| <p>Langley,<br/>2012<br/>[RCT]<sup>7</sup></p> <p><i>Infants/<br/>Toddlers<br/>(6-35<br/>months)</i></p> | <p>Fluviral F1 (Sanofi-Pasteur),<br/><b>7.5-µg/strain</b> [1 x 0.25 mL dose (Intramuscularly in<br/>the anterolateral part of the thigh (if the participant<br/>was less than 12 months) or in the deltoid region of<br/>the arm)]</p> <p><i>A/Brisbane/59/2007 (H1N1), A/Uruguay/716/2007<br/>(an A/Brisbane/10/2007 [H3N2]-like virus), and<br/>B/Florida/4/2006</i></p> | <p><b>Reactogenicity – injection site</b><br/><i>Pain</i> (NR): 45/164<br/><i>Redness</i> (NR): 49/164<br/><i>Swelling</i> (NR): 22/164</p> <p><b>Reactogenicity – systemic</b><br/><i>Drowsiness</i> (NR) – 44/164<br/><i>Fever</i> (NR) – 10/164<br/><i>Irritability</i> (NR) – 62/164<br/><i>Loss of appetite</i> (NR) – 37/164</p> <p><b>Adverse events</b><br/>SAE: 1/164</p>                                                                                                                                                                                                  | <ul style="list-style-type: none"> <li>Fluviral F1 group had 1 case of pneumonia resolved</li> <li>Fluviral F2 group had 1 case of bronchial hyper-reactivity in resolving stage</li> <li>The 0.5-mL dose of the study vaccine, when administered to children aged 6–35 months, resulted in a modest but not statistically significant improvement in</li> </ul>                                                                                                                                                                                                                                                                                                                                                                                |

| Author, Year; [Study design] Population                                 | Treatment arms<br>Brand name (manufacturer), HA/strain [dosing (administration)]<br>Included strains                                                                                                                                                                                                                                                                                                                                                                                                                                                                                                                                                                                                | Effectiveness and Safety<br>Outcome (definition):<br>n/N (unless otherwise indicated)                                                                                                                                                                                                                                                                                                                                                                                                                                                                                                                                                                                                                                                                                                                                                                                                                                                                                                                                                                                                  | Conclusions                                                                                                                                                      |
|-------------------------------------------------------------------------|-----------------------------------------------------------------------------------------------------------------------------------------------------------------------------------------------------------------------------------------------------------------------------------------------------------------------------------------------------------------------------------------------------------------------------------------------------------------------------------------------------------------------------------------------------------------------------------------------------------------------------------------------------------------------------------------------------|----------------------------------------------------------------------------------------------------------------------------------------------------------------------------------------------------------------------------------------------------------------------------------------------------------------------------------------------------------------------------------------------------------------------------------------------------------------------------------------------------------------------------------------------------------------------------------------------------------------------------------------------------------------------------------------------------------------------------------------------------------------------------------------------------------------------------------------------------------------------------------------------------------------------------------------------------------------------------------------------------------------------------------------------------------------------------------------|------------------------------------------------------------------------------------------------------------------------------------------------------------------|
|                                                                         | <p>Fluviral F2 (Sanofi-Pasteur),<br/><b>15-µg/strain</b> [1 x 0.5mL dose (Intramuscularly in the anterolateral part of the thigh (if the subject was less than 12 months) or in the deltoid region of the arm)]</p> <p><i>A/Brisbane/59/2007 (H1N1), A/Uruguay/716/2007 (an A/Brisbane/10/2007 [H3N2]-like virus), and B/Florida/4/2006</i></p> <p>Vaxigrip (Sanofi-Pasteur),<br/><b>7.5-µg/strain</b> [1 x 0.25 mL dose (Intramuscularly in the anterolateral part of the thigh (if the participant was less than 12 months) or in the deltoid region of the arm)]</p> <p><i>A/Brisbane/59/2007 (H1N1), A/Uruguay/716/2007 (an A/Brisbane/10/2007 [H3N2]-like virus), and B/Florida/4/2006</i></p> | <p><i>Unsolicted adverse events (NR): 108/164</i><br/><i>Medically attended events (NR): 52/164</i></p> <p><b>Reactogenicity – injection site</b><br/><i>Pain (NR): 55/167</i><br/><i>Redness (NR): 54/167</i><br/><i>Swelling (NR): 24/167</i></p> <p><b>Reactogenicity – systemic</b><br/><i>Drowsiness (NR) – 52/167</i><br/><i>Fever (NR) – 6/167</i><br/><i>Irritability (NR) – 69/167</i><br/><i>Loss of appetite (NR) – 43/167</i></p> <p><b>Adverse events</b><br/><i>SAE: 1/167</i><br/><i>Unsolicted adverse events (NR): 112/167</i><br/><i>Medically attended events (NR): 40/167</i></p> <p><b>Reactogenicity – injection site</b><br/><i>Pain (NR): 17/43</i><br/><i>Redness (NR): 13/43</i><br/><i>Swelling (NR): 5/43</i></p> <p><b>Reactogenicity – systemic</b><br/><i>Drowsiness (NR) – 11/43</i><br/><i>Fever (NR) – 2/43</i><br/><i>Irritability (NR) – 15/43</i><br/><i>Loss of appetite (NR) – 9/43</i></p> <p><b>Adverse events</b><br/><i>SAE: NR/43</i><br/><i>Unsolicted adverse events (NR): 24/43</i><br/><i>Medically attended events (NR): 9/43</i></p> | <p>immunogenicity with clinically similar safety and reactogenicity compared with the 0.25-mL dose.</p>                                                          |
| <p>Pavia-Ruz, 2013 [RCT]<sup>8</sup></p> <p><i>Infants/Toddlers</i></p> | <p>Fluarix (GSK),<br/><b>15-µg/strain</b> [1 x 0.5mL dose (intramuscular injection into the right deltoid muscle or anterolateral thigh)]</p>                                                                                                                                                                                                                                                                                                                                                                                                                                                                                                                                                       | <p><b>Reactogenicity – injection site</b><br/><i>Any injection site reactions<sup>9</sup>: 514/1086</i><br/><i>Pain: 406/1086</i><br/><i>Redness: 249/1086</i><br/><i>Swelling: 170/1086</i></p>                                                                                                                                                                                                                                                                                                                                                                                                                                                                                                                                                                                                                                                                                                                                                                                                                                                                                       | <ul style="list-style-type: none"> <li>The reactogenicity and safety profile of the study vaccine did not appear to be affected by doubling the dose.</li> </ul> |

| Author, Year; [Study design] Population | Treatment arms<br>Brand name (manufacturer), HA/strain [dosing (administration)]<br>Included strains                                                                                                                                 | Effectiveness and Safety<br>Outcome (definition):<br>n/N (unless otherwise indicated)                                                                                                                                                                                                                                                                                                                                    | Conclusions                                                                                                                                                                                                                                                                                        |
|-----------------------------------------|--------------------------------------------------------------------------------------------------------------------------------------------------------------------------------------------------------------------------------------|--------------------------------------------------------------------------------------------------------------------------------------------------------------------------------------------------------------------------------------------------------------------------------------------------------------------------------------------------------------------------------------------------------------------------|----------------------------------------------------------------------------------------------------------------------------------------------------------------------------------------------------------------------------------------------------------------------------------------------------|
| (6-35 months)                           | A/Brisbane/59/2007 (H1N1), A/Uruguay/716/2007 (H3N2) and B/Brisbane/3/2007                                                                                                                                                           | <b>Reactogenicity – systemic</b><br>Any general reactions <sup>10</sup> : 575/1086<br>Drowsiness: 317/1086<br>Fever: 69/1086<br>Irritability: 387/1086<br>Loss of appetite: 273/1086<br><br><b>Adverse events</b><br>Any AE: 729/1086<br>SAE: 29/1086                                                                                                                                                                    | <ul style="list-style-type: none"> <li>One subject in the Flu-15µg group had two SAEs, (apnea and cyanosis) which were considered by the investigator to be possibly related to vaccination. The participant was hospitalized and the events resolved on the same day as they occurred.</li> </ul> |
|                                         | Fluarix (GSK),<br><b>7.5-µg/strain</b> [1 x 0.25 mL dose (intramuscular injection into the right deltoid muscle or anterolateral thigh)]<br><br>A/Brisbane/59/2007 (H1N1), A/Uruguay/716/2007 (H3N2) and B/Brisbane/3/2007           | <b>Reactogenicity – injection site</b><br>Any injection site reactions <sup>9</sup> : 492/1081<br>Pain: 403/1081<br>Redness: 259/1081<br>Swelling: 152/1081<br><br><b>Reactogenicity – systemic</b><br>Any general reactions <sup>10</sup> : 598/1081<br>Drowsiness: 293/1081<br>Fever: 67/1081<br>Irritability: 386/1081<br>Loss of appetite: 281/1081<br><br><b>Adverse events</b><br>Any AE: 724/1081<br>SAE: 35/1081 |                                                                                                                                                                                                                                                                                                    |
|                                         | Fluzone (Sanofi-Pasteur),<br><b>7.5-µg/strain</b> [1 x 0.25 mL dose (intramuscular injection into the right deltoid muscle or anterolateral thigh)]<br><br>A/Brisbane/59/2007 (H1N1), A/Uruguay/716/2007 (H3N2) and B/Florida/4/2006 | <b>Reactogenicity – injection site</b><br>Any injection site reactions <sup>9</sup> : 467/1090<br><br>Pain: 363/1090<br>Redness: 253/1090<br>Swelling: 129/1090<br><br><b>Reactogenicity – systemic</b><br>Any general reactions <sup>10</sup> : 592/1090<br>Drowsiness: 298/1090<br>Irritability: 375/1090<br>Fever: 72/1090<br>Loss of appetite: 270/1090                                                              |                                                                                                                                                                                                                                                                                                    |

| Author, Year; [Study design] Population                               | Treatment arms<br>Brand name (manufacturer), HA/strain [dosing (administration)]<br>Included strains                                                                                                         | Effectiveness and Safety<br>Outcome (definition):<br>n/N (unless otherwise indicated)                                                                                                                    | Conclusions                                                                                                                                                                                                                                                                                                                                                                                                                                                                                                                                                                                                                                                                                                                                                                              |
|-----------------------------------------------------------------------|--------------------------------------------------------------------------------------------------------------------------------------------------------------------------------------------------------------|----------------------------------------------------------------------------------------------------------------------------------------------------------------------------------------------------------|------------------------------------------------------------------------------------------------------------------------------------------------------------------------------------------------------------------------------------------------------------------------------------------------------------------------------------------------------------------------------------------------------------------------------------------------------------------------------------------------------------------------------------------------------------------------------------------------------------------------------------------------------------------------------------------------------------------------------------------------------------------------------------------|
|                                                                       |                                                                                                                                                                                                              | <b>Adverse events</b><br>Any AE: 722/1090<br>SAE: 31/1090                                                                                                                                                |                                                                                                                                                                                                                                                                                                                                                                                                                                                                                                                                                                                                                                                                                                                                                                                          |
| Halasa, 2015 [RCT] <sup>9</sup><br><br>Infants/Toddlers (6-35 months) | Fluzone (Sanofi Pasteur),<br><b>7.5-µg/strain</b> [1 x 0.25 mL dose (intramuscular)]<br><br><i>A/California/7/09 (H1N1)-like virus, A/Perth/16/2009 (H3N2)-like virus, and B/Brisbane/60/2008-like virus</i> | <b>Reactogenicity</b><br><i>Redness at injection site: 8/48</i><br><i>Fever (temperature &gt;39°C after the first dose): 7/80</i>                                                                        | <ul style="list-style-type: none"> <li>No significant differences between the full-dose or half-dose groups for either the fully primed or naive cohorts for systemic reactions or local reactions when both seasons were combined.</li> <li>The only significant difference in the 2011–2012 season was that 8 of 48 (16.7%) participants in the half-dose group compared with 32 of 96 (33.3%) in the full-dose group had increased redness at the injection site (<math>P &lt; .05</math>).</li> <li>No significant differences between the groups in unsolicited AEs, serious adverse events (SAEs), or onset of chronic medical conditions between the dose groups in either the naive or fully primed cohorts, and none of the SAEs were deemed related to the vaccine.</li> </ul> |
|                                                                       | Fluzone (Sanofi Pasteur),<br><b>15-µg/strain</b> [1 x 0.5 mL dose (intramuscular)]<br><br><i>A/California/7/09 (H1N1)-like virus, A/Perth/16/2009 (H3N2)-like virus, and B/Brisbane/60/2008-like virus</i>   | <b>Reactogenicity</b><br><i>Redness at injection site: 32/96</i><br><i>Fever (temperature &gt;39°C after the first dose): 19/161</i>                                                                     |                                                                                                                                                                                                                                                                                                                                                                                                                                                                                                                                                                                                                                                                                                                                                                                          |
| Phung, 2016 [RCT] <sup>10</sup><br><br>Infants/Toddlers (6-35 months) | FLUAD (NR),<br><b>NR [1 x 0.5mL dose]</b> (Intramuscular injection)]<br><br><i>A/H1N1, A/H3N2, Strain B</i>                                                                                                  | <b>Reactogenicity</b><br><i>Any local reaction<sup>11</sup>: 45/61</i><br><i>Any systemic reaction<sup>12</sup>: 36/61</i><br><br><b>Adverse events</b><br>SAE (based on MedDRA v 17.1 definition): 2/61 |                                                                                                                                                                                                                                                                                                                                                                                                                                                                                                                                                                                                                                                                                                                                                                                          |
|                                                                       | FLUAD (NR),<br><b>NR [1 x 0.25 mL dose]</b> (Intramuscular injection)]                                                                                                                                       | <b>Reactogenicity</b><br><i>Any local reaction<sup>11</sup>: 63/75</i>                                                                                                                                   |                                                                                                                                                                                                                                                                                                                                                                                                                                                                                                                                                                                                                                                                                                                                                                                          |



| Author,<br>Year;<br>[Study<br>design]<br>Population                                  | Treatment arms<br>Brand name (manufacturer),<br>HA/strain [dosing (administration)]<br>Included strains                                                                                                                                                 | Effectiveness and Safety<br>Outcome (definition):<br>n/N (unless otherwise indicated)                                                                                                                                                                                                                                                                                                                                                                            | Conclusions                                                                                                                                                                                                                                                                                                                                                                                |
|--------------------------------------------------------------------------------------|---------------------------------------------------------------------------------------------------------------------------------------------------------------------------------------------------------------------------------------------------------|------------------------------------------------------------------------------------------------------------------------------------------------------------------------------------------------------------------------------------------------------------------------------------------------------------------------------------------------------------------------------------------------------------------------------------------------------------------|--------------------------------------------------------------------------------------------------------------------------------------------------------------------------------------------------------------------------------------------------------------------------------------------------------------------------------------------------------------------------------------------|
|                                                                                      | A/H1N1, A/H3N2, Strain B                                                                                                                                                                                                                                | Any systemic reaction <sup>12</sup> : 42/75<br><br><b>Adverse events</b><br>SAE (based on MedDRA v 17.1 definition): 2/75                                                                                                                                                                                                                                                                                                                                        |                                                                                                                                                                                                                                                                                                                                                                                            |
|                                                                                      | Agrippal S1 (NR),<br>NR [1 x 0.5mL dose (Intramuscular injection)]<br><br>A/H1N1, A/H3N2, Strain B                                                                                                                                                      | <b>Reactogenicity</b><br>Any local reaction <sup>11</sup> : 42/51<br>Any systemic reaction <sup>12</sup> : 24/51<br><br><b>Adverse events</b><br>SAE (based on MedDRA v 17.1 definition): 0/51                                                                                                                                                                                                                                                                   |                                                                                                                                                                                                                                                                                                                                                                                            |
|                                                                                      | Agrippal S1 (NR),<br>NR [1 x 0.25mL dose (Intramuscular injection)]<br>A/H1N1, A/H3N2, Strain B                                                                                                                                                         | <b>Reactogenicity</b><br>Any local reaction <sup>11</sup> : 6/10<br>Any systemic reaction <sup>12</sup> : 5/10<br><br><b>Adverse events</b><br>SAE (based on MedDRA v 17.1): 0/10                                                                                                                                                                                                                                                                                |                                                                                                                                                                                                                                                                                                                                                                                            |
| Jain,<br>2017<br>[RCT] <sup>11</sup><br><br>Infants/<br>Toddlers<br>(6-35<br>months) | Flulaval Quadrivalent (GSK),<br><b>15-µg/strain</b> [1 x 0.5mL dose (intramuscular in<br>deltoid region)]<br><br>A/California/7/2009 (A/H1N1), A/Texas/50/2012<br>(A/H3N2), B/Brisbane/60/2008 (B/Victoria), and<br>B/Massachusetts/2/2012 (B/Yamagata) | <b>Reactogenicity – injection site (within 7 days)</b><br>Pain: 44.0%<br>Redness: 1.4%<br>Swelling: 1.0%<br><br><b>Reactogenicity – systemic (within 7 days)</b><br>Drowsiness: 40.6%<br>Fever (>=38.0C): 7.9%<br>Irritability/fussiness: 54.4%<br>Loss of appetite: 33.7%<br><br><b>Adverse events</b><br>Any AE: 45.5%<br>Vaccine-related AE: 5.9%<br>Any SAE <sup>13</sup> : 1.8%<br>Febrile seizures: 0.4%<br>Medically attended event <sup>14</sup> : 60.2% | <ul style="list-style-type: none"> <li>▪ None of the febrile seizures or the SAEs were considered by the investigator to be related to vaccination</li> <li>▪ Double-dose IIV4 may improve protection against influenza B in some young children and simplifies annual influenza vaccination by allowing the same vaccine dose to be used for all eligible children and adults.</li> </ul> |
|                                                                                      | Fluzone Quadrivalent (Sanofi Pasteur),<br><b>7.5-µg/strain</b> [1 x 0.25 mL dose (intramuscular in<br>deltoid region)]                                                                                                                                  | <b>Reactogenicity – injection site (within 7 days)</b><br>Pain: 40.1%<br>Redness: 1.4%<br>Swelling: 0.4%<br><br><b>Reactogenicity – systemic (within 7 days)</b>                                                                                                                                                                                                                                                                                                 |                                                                                                                                                                                                                                                                                                                                                                                            |

| Author,<br>Year;<br>[Study<br>design]<br>Population                                                           | Treatment arms<br>Brand name (manufacturer),<br>HA/strain [dosing (administration)]<br>Included strains                                                                                                                                                                                                                                                                                                                                                                                                                                                                                                                                                                               | Effectiveness and Safety<br>Outcome (definition):<br>n/N (unless otherwise indicated)                                                                                                                                                                                                                                                                                                                                                                                                                                                                                                                                                                                                                                                                                                                                                                                                                                            | Conclusions                                                                                                                                                                                                                                                                                                                                                                                                                                                                                                                                                                                                                                                                                                                                                        |
|---------------------------------------------------------------------------------------------------------------|---------------------------------------------------------------------------------------------------------------------------------------------------------------------------------------------------------------------------------------------------------------------------------------------------------------------------------------------------------------------------------------------------------------------------------------------------------------------------------------------------------------------------------------------------------------------------------------------------------------------------------------------------------------------------------------|----------------------------------------------------------------------------------------------------------------------------------------------------------------------------------------------------------------------------------------------------------------------------------------------------------------------------------------------------------------------------------------------------------------------------------------------------------------------------------------------------------------------------------------------------------------------------------------------------------------------------------------------------------------------------------------------------------------------------------------------------------------------------------------------------------------------------------------------------------------------------------------------------------------------------------|--------------------------------------------------------------------------------------------------------------------------------------------------------------------------------------------------------------------------------------------------------------------------------------------------------------------------------------------------------------------------------------------------------------------------------------------------------------------------------------------------------------------------------------------------------------------------------------------------------------------------------------------------------------------------------------------------------------------------------------------------------------------|
|                                                                                                               | A/California/7/2009 (A/H1N1), A/Texas/50/2012 (A/H3N2), B/Brisbane/60/2008 (B/Victoria), and B/Massachusetts/2/2012 (B/Yamagata)                                                                                                                                                                                                                                                                                                                                                                                                                                                                                                                                                      | <p>Drowsiness: 40.9%<br/>Fever (<math>\geq 38.0^{\circ}\text{C}</math>): 7.5%<br/>Irritability/fussiness: 50.5%<br/>Loss of appetite: 33.4%</p> <p><b>Adverse events</b><br/>Any AE: 44.1%<br/>Vaccine-related AE: 5.8%<br/>Any SAE<sup>13</sup>: 1.7%<br/>Febrile seizures: 0.3%<br/>Medically attended event<sup>14</sup>: 59.1%</p>                                                                                                                                                                                                                                                                                                                                                                                                                                                                                                                                                                                           |                                                                                                                                                                                                                                                                                                                                                                                                                                                                                                                                                                                                                                                                                                                                                                    |
| Ojeda.<br>2019<br>[RCT] <sup>12</sup><br><br>Infants/<br>Toddlers and<br>Children<br>(6 months –<br>17 years) | <p>Vaxigrip Tetra (Sanofi Pasteur) – PFS, 15-<math>\mu\text{g}</math>/strain [1 x 0.5mL dose (intramuscular or deep subcutaneous injection)]</p> <p>A/Michigan/45/2015 (H1N1)pdm09-like virus, A/Hong Kong/4801/2014 (H3N2)-like virus, /Brisbane/60/2008-like virus (B/Victoria lineage), and B/Phuket/3073/2013 (B/Yamagata lineage)</p> <p>Vaxigrip Tetra (Sanofi Pasteur) - MDV, 15-<math>\mu\text{g}</math>/strain [1 x 0.5mL dose (intramuscular or deep subcutaneous injection)]</p> <p>A/Michigan/45/2015 (H1N1)pdm09-like virus, A/Hong Kong/4801/2014 (H3N2)-like virus, /Brisbane/60/2008-like virus (B/Victoria lineage), and B/Phuket/3073/2013 (B/Yamagata lineage)</p> | <p><b>Reactogenicity, N=142</b><br/>Any injection-site reaction (solicited within 7 days): 26 (6-35mo), 16 (3-8yr), 42 (9-7yr)<br/>Any systemic reaction (solicited within 7 days): 25 (6-35mo), 15 (3-8yr), 35 (9-7yr)</p> <p><b>Adverse events, N=147</b><br/>AE (immediate unsolicited): 1 (9-17 years)<br/>Non-serious AE: 25 (6-35mo), 9 (3-8yr), 8 (9-7yr)<br/>Vaccine-related non-serious AE: 1 (9-17 years)<br/>AE leading to study discontinuation: 0<br/>SAE: 0</p> <p><b>Reactogenicity, N=139</b><br/>Any injection-site reaction(solicited within 7 days): 27 (6-35mo), 16 (3-8yr), 26 (9-7yr)<br/>Any systemic reaction(solicited within 7 days): 33 (6-35mo), 13 (3-8yr), 30 (9-7yr)</p> <p><b>Adverse events, N=150</b><br/>AE (immediate unsolicited): 0<br/>Non-serious AE: 31 (6-35mo), 14 (3-8yr), 5 (9-7yr)<br/>Vaccine-related non-serious AE: 0<br/>AE leading to study discontinuation: 0<br/>SAE: 0</p> | <ul style="list-style-type: none"> <li>▪ Solicited reactions were mostly grade 1 (mild) in intensity and resolved within 3 days.</li> <li>▪ Solicited systemic reactions were reported in more infants aged 6 – 35 months in the MDV group than in the PFS group however, because the 95% CIs were overlapping, this was not thought clinically significant.</li> <li>▪ None of these unsolicited AEs were considered related to a study vaccine by the investigators.</li> <li>▪ There were no differences in reactogenicity or safety between the two vaccine formats. These results showed that the MDV format of QIV was as safe and immunogenic as the PFS format in infants, children, and adolescents. These findings support the use of MDV QIV</li> </ul> |

| Author,<br>Year;<br>[Study<br>design]<br>Population                              | Treatment arms<br>Brand name (manufacturer),<br>HA/strain [dosing (administration)]<br>Included strains                                                                                                                                                                                                                                                                                                                                                                                                                                                                                                                        | Effectiveness and Safety<br><i>Outcome</i> (definition):<br>n/N (unless otherwise indicated)                                                                                                                                                                                                                                                                                                                                                                                                                                                                                                                                                                                                                                                                                    | Conclusions                                                                                                                                                                                                                                                                                                                                                                                                                                                                                                                                                                                                                                                                                                                                      |
|----------------------------------------------------------------------------------|--------------------------------------------------------------------------------------------------------------------------------------------------------------------------------------------------------------------------------------------------------------------------------------------------------------------------------------------------------------------------------------------------------------------------------------------------------------------------------------------------------------------------------------------------------------------------------------------------------------------------------|---------------------------------------------------------------------------------------------------------------------------------------------------------------------------------------------------------------------------------------------------------------------------------------------------------------------------------------------------------------------------------------------------------------------------------------------------------------------------------------------------------------------------------------------------------------------------------------------------------------------------------------------------------------------------------------------------------------------------------------------------------------------------------|--------------------------------------------------------------------------------------------------------------------------------------------------------------------------------------------------------------------------------------------------------------------------------------------------------------------------------------------------------------------------------------------------------------------------------------------------------------------------------------------------------------------------------------------------------------------------------------------------------------------------------------------------------------------------------------------------------------------------------------------------|
|                                                                                  |                                                                                                                                                                                                                                                                                                                                                                                                                                                                                                                                                                                                                                |                                                                                                                                                                                                                                                                                                                                                                                                                                                                                                                                                                                                                                                                                                                                                                                 | as a resource-saving alternative for seasonal influenza vaccination.                                                                                                                                                                                                                                                                                                                                                                                                                                                                                                                                                                                                                                                                             |
| Robertson, 2019 [RCT] <sup>13</sup><br><br>Infants/<br>Toddlers<br>(6-35 months) | <p>Fluzone Quadrivalent (Sanofi Pasteur), <b>15-µg/strain</b> [1 x 0.5mL dose (intramuscular single-dose syringes in deltoid of arm)]</p> <p><i>A/California/07/2009 X-179A (H1N1), A/Hong Kong/4801/2014 X-263B (H3N2), B/Brisbane/60/2008 (Victoria lineage), B/Phuket/3073/2013 (Yamagata lineage)</i></p> <p>Fluzone Quadrivalent (Sanofi Pasteur), <b>7.5-µg/strain</b> [1 x 0.25 mL dose (intramuscular single-dose syringes in deltoid of arm)]</p> <p><i>A/California/07/2009 X-179A (H1N1), A/Hong Kong/4801/2014 X-263B (H3N2), B/Brisbane/60/2008 (Victoria lineage), B/Phuket/3073/2013 (Yamagata lineage)</i></p> | <p><b>Reactogenicity</b><br/><i>Any injection-site reaction</i><sup>15</sup>: 533/939<br/><i>Any systemic reaction</i><sup>16</sup>: 561/941</p> <p><b>Adverse events</b><br/><i>Vaccine-related AE</i> (immediate within 30 mins): 0/992<br/><i>Vaccine-related AE</i> (within 28 days): 30/992<br/><i>AE leading to study discontinuation</i>: 0/992<br/><i>SAE</i>: 5/992</p> <p><b>Reactogenicity</b><br/><i>Any injection-site reaction</i><sup>15</sup>: 480/909<br/><i>Any systemic reaction</i><sup>16</sup>: 533/909</p> <p><b>Adverse events</b><br/><i>Vaccine-related AE</i> (unsolicited within 30 mins): 1/949<br/><i>Vaccine-related AE</i> (unsolicited within 28 days): 29/949<br/><i>AE leading to study discontinuation</i>: 3/949<br/><i>SAE</i>: 5/949</p> | <ul style="list-style-type: none"> <li>▪ Proportions of participants reporting solicited injection-site reactions, solicited systemic reactions, vaccine-related unsolicited AEs were similar for the full- and half-dose groups</li> <li>▪ None of the AEs leading to study discontinuation or the SAEs were considered related to vaccination</li> <li>▪ A single AE of special interest (chronic urticaria first appearing 3 days post-vaccination and continuing for &gt;6 weeks) was considered by the investigator to be related to vaccination</li> <li>▪ In children 6–35 months of age, a full dose of IIV4 was immunogenic and had a safety profile comparable to that of a half dose with no new safety concerns observed.</li> </ul> |

**Abbreviations:** AE – adverse events, ID – intradermal; ILI – influenza-like illness; IM – intramuscular; MDV – multi-dose vials, n – number of people with condition, N – sample size of treatment arm, NR – not reported, PFS – prefilled syringe, SAE – serious adverse events

<sup>1</sup> Defined as mild (easily tolerated), moderate (interferes with normal behaviour or activities), severe (incapacitating, unable to perform usual activities, may require medical attention)

<sup>2</sup> Present at or near the approximate point of needle entry; small <2.5cm, medium >2.5cm to <5cm, large >5cm

<sup>3</sup> Oral temperature >37.5 C; mild >37.5 to 38 C, moderate >38.1 to 39 C, severe >39.1 C

<sup>4</sup> Grade I reactions defined as “present but easily tolerated” for fatigue, muscle ache, headache, itching or pain at injection site; oral temperature >=38 and <39 degrees Celsius; some limitation to arm motion due to stiffness or discomfort but easily tolerated; redness or swelling >= 8cm

1  
2  
3 <sup>5</sup> Grade II/III reactions defined as “interferes with normal activity” to “severe and incapacitating” for fatigue, muscle ache, headache, itching or pain at  
4 injection site; oral temperature  $\geq 39$  degrees Celsius; limitation to arm motion due to stiffness or discomfort that interferes with normal activity; redness  
5 or swelling  $> 8$ cm

6 <sup>6</sup> Defined as serious adverse events resulting in hospitalization

7 <sup>7</sup> Solicited local reactions included ecchymosis, erythema, induration, swelling, and tenderness at injection site

8 <sup>8</sup> Solicited systemic reactions included sleepiness, diarrhea, vomiting, irritability, change in eating habits, shivering, and unusual crying

9 <sup>9</sup> Included injection site reactions of Grade 1, “minor reaction to touch”, Grade 2, “cries/protests on touch”, and Grade 3, “cries when limb  
10 moved/spontaneously painful”

11 <sup>10</sup> Included systemic reactions of Grade 1, “no effect on normal activity”, Grade 2, “interferes with normal activity”, and Grade 3, “prevents normal activity”

12 <sup>11</sup> Included injection site ecchymosis, injection site erythema, injection site induration, injection site swelling, tenderness, injection site pain

13 <sup>12</sup> Included change in eating habits, sleepiness, unusual crying, irritability, vomiting, diarrhea, chills/shivering, malaise, myalgia, arthralgia, headache,  
14 fatigue, fever ( $>37.3$  C)

15 <sup>13</sup> Defined serious adverse events as any untoward medical occurrence that results in death, is life-threatening, requires/prolongs hospitalization, or  
16 results in disability or incapacity during entire study period

17 <sup>14</sup> Defined as hospitalization, emergency room visit, and/or medical practitioner visit during entire study period

18 <sup>15</sup> Included tenderness, redness and/or swelling solicited within 7 days

19 <sup>16</sup> Included fever, vomiting, abnormal crying, drowsiness, loss of appetite, and/or irritability solicited within 7 days  
20  
21  
22  
23  
24  
25  
26  
27  
28  
29  
30  
31  
32  
33  
34  
35  
36  
37  
38  
39  
40  
41  
42  
43  
44  
45  
46  
47

# BMJ Open

## Safety and effectiveness of dose-sparing strategies for intramuscular seasonal influenza vaccine: A rapid scoping review

|                                 |                                                                                                                                                                                                                                                                                                                                                                                                                                                                                                                                                                                                                  |
|---------------------------------|------------------------------------------------------------------------------------------------------------------------------------------------------------------------------------------------------------------------------------------------------------------------------------------------------------------------------------------------------------------------------------------------------------------------------------------------------------------------------------------------------------------------------------------------------------------------------------------------------------------|
| Journal:                        | <i>BMJ Open</i>                                                                                                                                                                                                                                                                                                                                                                                                                                                                                                                                                                                                  |
| Manuscript ID                   | bmjopen-2021-050596.R2                                                                                                                                                                                                                                                                                                                                                                                                                                                                                                                                                                                           |
| Article Type:                   | Original research                                                                                                                                                                                                                                                                                                                                                                                                                                                                                                                                                                                                |
| Date Submitted by the Author:   | 29-Aug-2021                                                                                                                                                                                                                                                                                                                                                                                                                                                                                                                                                                                                      |
| Complete List of Authors:       | Lunny, Carole; UBC, DAPT; St Michael's Hospital Li Ka Shing Knowledge Institute, Knowledge Translation Program<br>Antony, Jesmin; St Michael's Hospital Li Ka Shing Knowledge Institute<br>Rios, Patricia; Independent Researcher<br>Williams, Chantal ; Independent Researcher<br>Ramkissoon, Naveeta; St Michael's Hospital Li Ka Shing Knowledge Institute, Knowledge Translation<br>Straus, Sharon; St Michael's Hospital Li Ka Shing Knowledge Institute; University of Toronto, Geriatric Medicine<br>Tricco, Andrea; St Michael's Hospital Li Ka Shing Knowledge Institute, Knowledge Translation Program |
| <b>Primary Subject Heading</b>: | Immunology (including allergy)                                                                                                                                                                                                                                                                                                                                                                                                                                                                                                                                                                                   |
| Secondary Subject Heading:      | Immunology (including allergy)                                                                                                                                                                                                                                                                                                                                                                                                                                                                                                                                                                                   |
| Keywords:                       | VIROLOGY, IMMUNOLOGY, PUBLIC HEALTH                                                                                                                                                                                                                                                                                                                                                                                                                                                                                                                                                                              |
|                                 |                                                                                                                                                                                                                                                                                                                                                                                                                                                                                                                                                                                                                  |

SCHOLARONE™  
Manuscripts



I, the Submitting Author has the right to grant and does grant on behalf of all authors of the Work (as defined in the below author licence), an exclusive licence and/or a non-exclusive licence for contributions from authors who are: i) UK Crown employees; ii) where BMJ has agreed a CC-BY licence shall apply, and/or iii) in accordance with the terms applicable for US Federal Government officers or employees acting as part of their official duties; on a worldwide, perpetual, irrevocable, royalty-free basis to BMJ Publishing Group Ltd ("BMJ") its licensees and where the relevant Journal is co-owned by BMJ to the co-owners of the Journal, to publish the Work in this journal and any other BMJ products and to exploit all rights, as set out in our [licence](#).

The Submitting Author accepts and understands that any supply made under these terms is made by BMJ to the Submitting Author unless you are acting as an employee on behalf of your employer or a postgraduate student of an affiliated institution which is paying any applicable article publishing charge ("APC") for Open Access articles. Where the Submitting Author wishes to make the Work available on an Open Access basis (and intends to pay the relevant APC), the terms of reuse of such Open Access shall be governed by a Creative Commons licence – details of these licences and which [Creative Commons](#) licence will apply to this Work are set out in our licence referred to above.

Other than as permitted in any relevant BMJ Author's Self Archiving Policies, I confirm this Work has not been accepted for publication elsewhere, is not being considered for publication elsewhere and does not duplicate material already published. I confirm all authors consent to publication of this Work and authorise the granting of this licence.

1  
2  
3 **1 Safety and effectiveness of dose-sparing strategies for intramuscular seasonal influenza**  
4 **2 vaccine:**  
5 **3 A rapid scoping review**  
6 **4**

7  
8 5 Carole Lunny<sup>1,2\*†</sup>

Email: [carole.lunny@ubc.ca](mailto:carole.lunny@ubc.ca)

9 6 Jesmin Antony<sup>2\*</sup>

Email: [jesmin.antony@unityhealth.to](mailto:jesmin.antony@unityhealth.to)

10 7 Patricia Rios<sup>3</sup>

Email: [patricia.rios@wchospital.ca](mailto:patricia.rios@wchospital.ca)

11 8 Chantal Williams<sup>3</sup>

Email: [chantal.williams@uhn.ca](mailto:chantal.williams@uhn.ca)

12 9 Naveeta Ramkissoon<sup>2</sup>

Email: [naveeta.ramkissoon@unityhealth.to](mailto:naveeta.ramkissoon@unityhealth.to)

13 10 Sharon E. Straus<sup>2,4,5</sup>

Email: [sharon.straus@unityhealth.to](mailto:sharon.straus@unityhealth.to)

14 11 Andrea C. Tricco<sup>2,6</sup>

Email: [andrea.tricco@unityhealth.to](mailto:andrea.tricco@unityhealth.to)

15  
16  
17 13 <sup>1</sup>Cochrane Hypertension Review Group and the Therapeutics Initiative, University of British  
18 14 Columbia, Vancouver, BC

19 15 <sup>2</sup>Li Ka Shing Knowledge Institute, St. Michael's Hospital, Unity Health Toronto, Toronto,  
20 16 Ontario, Canada

21 17 <sup>3</sup>Independent Researcher

22 18 <sup>4</sup>Department of Medicine, University of Toronto, Toronto, Ontario, Canada

23 19 <sup>5</sup>Department of Geriatric Medicine, University of Toronto, Toronto, Ontario, Canada

24 20 <sup>6</sup>Epidemiology Division, Dalla Lana School of Public Health and Institute for Health,  
25 21 Management, and Evaluation, University of Toronto, Toronto, Ontario, Canada

26  
27  
28 23 \*These authors contributed equally.

29  
30  
31 25 †Corresponding Author : Carole Lunny, MPH, PhD, Postdoctoral Fellow, Methodology and  
32 26 Research Synthesis

33 27 SPOR Evidence Alliance, Unity Health, University of Toronto

34 28  
35 29 Word count: 3559  
36  
37  
38  
39  
40  
41  
42  
43  
44  
45  
46  
47  
48  
49  
50  
51  
52  
53  
54  
55  
56  
57  
58  
59  
60

1  
2  
3 30 **ABSTRACT**

4 31 **Background:** The objective of this rapid scoping review was to identify studies of dose-sparing  
5 32 strategies for administration of intramuscular seasonal influenza vaccines in healthy individuals  
6 33 of all ages.

8 34 **Methods:** Comprehensive literature searches were executed in MEDLINE, Embase, and the  
9 35 Cochrane library. The grey literature was searched via international clinical trial registries for  
10 36 relevant studies published in English in the last 20 years. We included studies in healthy humans  
11 37 of any age that used any dose-sparing strategy to administer intramuscular seasonal influenza  
12 38 vaccines. Title/abstract and full-text screening were carried out by pairs of reviewers  
13 39 independently. Data extraction was conducted by a single reviewer and verified by a second  
14 40 reviewer. Our outcomes were influenza infections, ICU admission, pneumonia, hospitalizations,  
15 41 adverse events, and mortality. Results were summarized descriptively.

17 42 **Results:** A total of 13 studies with 10,351 participants were included in the review and all  
18 43 studies were randomized control trials (RCTs) conducted between 2006 and 2019. The most  
19 44 common interventions were the trivalent influenza vaccine (n=10), followed by the quadrivalent  
20 45 influenza vaccine (n=4). Nine studies included infants/toddlers 6-36 months old and one of these  
21 46 studies also included children and adolescents. In these nine studies, no clinical effectiveness  
22 47 outcomes were reported. Of the four adult studies ( $\geq 18$  years), two studies reported on  
23 48 effectiveness outcomes, however only one RCT reported on laboratory confirmed influenza.

25 49 **Conclusions:** Due to the low number of studies in healthy adults and the lack of studies  
26 50 assessing confirmed influenza and influenza-like illness, there remains a need for further  
27 51 evaluation.

28 52  
29 53 Keywords:  
30 54  
31  
32  
33  
34  
35  
36  
37  
38  
39  
40  
41  
42  
43  
44  
45  
46  
47  
48  
49  
50  
51  
52  
53  
54  
55  
56  
57  
58  
59  
60



1  
2  
3 55 **STRENGTHS AND LIMITATIONS OF THIS STUDY**

4 56 Strengths:

- 5 57 • This rapid scoping review was conducted within a 6-week timeline and the methods were  
6 58 tailored to provide results to the stakeholders within 4 weeks.  
7 59 • We did not restrict the search dates and study screening was completed in independently  
8 60 by two reviewers.

9 61 Limitations:

- 10 62 • We limited the selection of studies to those published in the English language, and data  
11 63 extraction was conducted by one abstractor and one verifier.  
12 64 • Twelve dose-sparing RCTs were not included in the review because they did not include  
13 65 vaccine interventions that were deemed of interest to the stakeholders, and/or did not  
14 66 provide sufficient data.

## 67 **BACKGROUND**

68 The symptoms of novel coronavirus disease (COVID-19) closely mimic those of seasonal  
69 influenza vaccine and health officials recommend vaccination against the flu to limit  
70 confounding of flu symptoms with COVID-19 symptoms. An anticipated shortage in influenza  
71 vaccine supplies was of concern.[1] This anticipated shortage did not happen however, and in the  
72 2019-2020 flu season, influenza vaccination coverage among adults (42%) was similar to the  
73 previous season (42%). This question of vaccine shortage remains relevant in Canada and other  
74 jurisdictions for future COVID-19 and flue seasons. As a potential solution, health officials were  
75 interested in assessing the effectiveness of fractional dosing (e.g., half-doses) of currently  
76 available intramuscular influenza vaccines.

77  
78 Fractional dosing, or dose-sparing, strategies are those where less than the standard dose of  
79 hemagglutinin (HA) antigen, and thus less volume of vaccine, is administered, increasing the  
80 overall number of influenza vaccine doses available. In Canada, influenza vaccines are currently  
81 authorized for intramuscular administration only, apart from the live-attenuated influenza  
82 vaccine, which is administered intranasally.[2] Standard dose influenza vaccines contain 15 mcg  
83 of HA per strain and are delivered in 0.5 mL volume. Therefore, the total amount of HA in  
84 standard dose trivalent vaccines is 45 mcg, and the total amount of HA in standard dose  
85 quadrivalent vaccines is 60 mcg.

86  
87 A scoping review of all the available dose-sparing strategies for intramuscular administration of  
88 seasonal influenza vaccines currently approved in Canada for healthy populations had not been  
89 systematically conducted. With the resource-constraints for the influenza season due to COVID-  
90 19, there was a need to scope the evidence on the safety and effectiveness of dose-sparing  
91 strategies for intramuscular administration of seasonal influenza vaccines. The objective of this  
92 rapid scoping review was to identify studies of dose-sparing strategies for administration of  
93 intramuscular seasonal influenza vaccines in healthy individuals of all ages. The results of this  
94 scoping review were used to inform a systematic review with meta-analysis by National  
95 Advisory Committee on Immunization (NACI) on the same topic [3].

## 97 **METHODS**

98 The Centre for Immunization and Respiratory Infectious Diseases of the Public Health Agency  
99 of Canada (PHAC) commissioned a rapid scoping review on the available methods for fractional  
100 dosing of seasonal influenza vaccines through the Canadian Institutes of Health Research  
101 (CIHR) Drug Safety and Effectiveness Network (DSEN) with a 6-week timeline for preliminary  
102 results.

### 104 **Protocol**

105 The methods for this review were guided by the updated reviewer manual for scoping reviews  
106 published by JBI and the World Health Organization's guide to rapid reviews.[4, 5] Results are  
107 reported according to the Preferred Reporting Items for Systematic Reviews and Meta-analysis  
108 extension to scoping reviews (PRISMA-ScR).[6] A protocol for this rapid scoping review was  
109 disseminated through the Open Science Framework registry (<https://osf.io/8mwz2/>).

### 111 **Patient and Public Involvement statement**

1  
2  
3 112  
4 113 No patients or the public were involved in this rapid scoping review.  
5

### 6 114 **Literature search**

7  
8 115 Comprehensive literature searches were developed and executed by an experienced librarian in  
9 116 Ovid MEDLINE (**Appendix 1**), EMBASE using the OVID interface (**Appendix 2**), and the  
10 117 Cochrane library between 1946 and May 2020 (**Appendix 3**). The literature search was peer  
11 118 reviewed by a second librarian using the PRESS checklist  
12 119 (<https://www.cadth.ca/resources/finding-evidence/press>). The grey (i.e., difficult to locate or  
13 120 unpublished) literature was searched via international clinical trial registries (i.e.  
14 121 clinicaltrials.gov, EU clinical trial register). References of relevant systematic reviews and  
15 122 included studies were also scanned.  
16 123

### 17 124 **Eligibility criteria**

18 125 The eligibility criteria followed the Population, Intervention, Comparators, Outcome, Study  
19 126 design (PICOS) framework as follows:

- 20 127 • Population: Healthy humans of any age. Immunocompromised populations and animal  
21 128 studies were excluded. Examples of persons with weakened immune systems include those  
22 129 with HIV/AIDS; cancer and transplant patients who are taking certain immunosuppressive  
23 130 drugs; and those with inherited diseases that affect the immune system (e.g., congenital  
24 131 agammaglobulinemia, congenital IgA deficiency)[7].
- 25 132 • Intervention: Any dose-sparing strategy used to administer intramuscular seasonal influenza  
26 133 vaccines (eligible vaccines listed in **Appendix 4**). Eligible strategies included, but were not  
27 134 limited to, administering less than the standard 15 ug HA antigen using multi-dose vials, half  
28 135 dosing, or pre-formulated products with reduced antigen quantity, or with revised vaccine  
29 136 dose schedules. Any studies examining monovalent pandemic vaccines,  
30 137 specialty/experimental vaccines (e.g., high dose), whole virus vaccines, or other routes of  
31 138 administration (e.g. intranasal, intradermal) were not eligible. Only vaccine products  
32 139 approved for use in Canada or equivalent formulations approved for use in other countries  
33 140 were eligible for inclusion. Concomitant administration with other vaccine products were  
34 141 included only if administered to both the intervention and the comparator groups.
- 35 142 • Comparator: Any of the interventions listed above, no intervention, or placebo.
- 36 143 • Outcomes: Lab-confirmed influenza infection (primary outcome), influenza-like illness or  
37 144 clinical/symptomatic diagnosis of influenza, hospitalization, intensive care unit (ICU)  
38 145 admission, pneumonia, mortality, and adverse events (local/systemic reactogenicity,  
39 146 vascular-related, serious). Reactogenicity represents the physical manifestation of the  
40 147 inflammatory response to vaccination, and can include injection-site pain, redness, swelling  
41 148 or induration at the injection site, as well as systemic symptoms, such as fever, myalgia, or  
42 149 headache.[8] Immunogenicity outcomes were not abstracted, but these studies were flagged  
43 150 for NACI.
- 44 151 • Study designs: Randomized controlled trials (RCTs), non-randomised studies (e.g., quasi-  
45 152 RCTs, non-randomized trials, interrupted time series, controlled before after), and  
46 153 observational studies (e.g., cohort, case control) were included. Studies must have had a  
47 154 control or comparator group in order to be eligible for inclusion and as such, cross-sectional,  
48 155 case series, case reports, and qualitative studies were excluded.

1  
2  
3 156 • Publication status: We included full text and abstracts if they included data on safety or  
4 157 effectiveness.  
5  
6 158 Inclusion was also limited to studies written in the English language due to the short timelines  
7 159 for the conduct of this review.  
8 160

### 9 161 **Study selection**

10 162 A screening form based on the eligibility criteria was prepared and pilot-tested with 30 studies  
11 163 with all members of the review team until sufficient agreement (>75%) was reached prior to both  
12 164 title/abstract (level 1) and full-text (level 2) screening. Subsequent screening at level 1 and level  
13 165 2 were completed by two reviewers working independently using the Knowledge Translation  
14 166 Program's proprietary screening software (synthesi.SR)[9]. Any discrepancies between  
15 167 reviewers were consistently resolved by a third independent reviewer.  
16 168

### 17 169 **Data extraction**

18 170 Items for data collection included study characteristics (study design, year of publication,  
19 171 country of conduct, multi-center vs. single site), patient characteristics (mean age, age range, sex,  
20 172 vaccination history), intervention details (type of vaccine, vaccine manufacturer, dose, timing  
21 173 and administration of treatment), comparator details (comparator intervention, dose), and  
22 174 outcome results (influenza infections, ICU admission, pneumonia, hospitalizations, adverse  
23 175 events, mortality) at the longest duration of follow-up.  
24 176

25 177 A standardized form for data extraction was developed and pilot tested by the entire review team  
26 178 using two pre-selected full-text RCTs to ensure understanding of the data items to be extracted,  
27 179 and congruence among reviewers. All included studies were extracted by one reviewer  
28 180 independently and then verified by a second reviewer.  
29 181

### 30 182 **Risk of bias assessment**

31 183 As this was a scoping review, the risk of bias of studies was not assessed.[4]  
32 184

### 33 185 **Synthesis**

34 186 The synthesis involved providing a descriptive summary of included studies with summary  
35 187 tables and detailed tables of study results. Study results were organized and tabulated according  
36 188 to patients (children vs adults), interventions, and outcomes and where available information on  
37 189 relevant subgroups.  
38 190

## 39 191 **RESULTS**

### 40 192 **Literature search**

41 193 We screened 2,378 titles and abstracts from our database search and an additional 13 citations  
42 194 located through searching the grey literature and scanning references. Of these, 144 potentially  
43 195 relevant full-text articles were screened for eligibility (**Figure 1**). Twelve studies that assessed  
44 196 dose-sparing strategies were excluded during full-text screening because the vaccine under study  
45 197 was not of interest or unclearly reported. We contacted authors of these 12 unclear studies and  
46 198 received 1 response confirming the vaccine was not of interest (see list of excluded studies in  
47 199 **Appendix 5**). Subsequently, 13 RCTs were included; five trial protocols were found and were  
48 200 denoted as duplicate/companion reports. No non-randomised or observational studies were found  
49 201 that fulfilled the eligibility criteria.  
50  
51  
52  
53  
54  
55  
56  
57  
58  
59  
60

## 202 Study characteristics

203 **Table 1** summarizes the characteristics of the 13 RCTs published between 2006 and 2019; and  
 204 conducted mainly in the US, followed by Mexico, Canada and Finland. The majority of the  
 205 studies evaluated trivalent vaccines (10/13 [77%]) and most were conducted in the 6-36 month-  
 206 old pediatric population (9/13 [69%]). Almost all studies reported on reactogenicity and/or other  
 207 adverse events, but only two studies reported on the effectiveness of our outcomes of interest  
 208 (i.e., lab-confirmed influenza and influenza-like illness).  
 209 Full study and patient characteristic details for each study are reported in **Appendix 6** and  
 210 treatment and outcome details in **Appendix 7**.

211  
212 **Table 1: Characteristics of included studies (n=13)**

| Characteristics                   | Category                             | Frequency (%)                  |
|-----------------------------------|--------------------------------------|--------------------------------|
| Date of publication               | 2006-2010                            | 4 (30.8)                       |
|                                   | 2011-2015                            | 5 (38.4)                       |
|                                   | 2016-2020                            | 4 (30.8)                       |
| Multi-center or single site       | Multi-centre                         | 8 (61.5)                       |
|                                   | Single centre                        | 2 (15.4)                       |
| Countries of conduct <sup>a</sup> | USA                                  | 8 (61.5)                       |
|                                   | Mexico                               | 3 (23.1)                       |
|                                   | Canada                               | 2 (15.4)                       |
|                                   | Finland                              | 2 (15.4)                       |
|                                   | Belgium                              | 1 (7.7)                        |
|                                   | Hong Kong                            | 1 (7.7)                        |
|                                   | Taiwan                               | 1 (7.7)                        |
|                                   | Thailand                             | 1 (7.7)                        |
|                                   | Populations <sup>a,b</sup>           | Infants/Toddlers (6-36 months) |
| Children (37 months – 17 years)   |                                      | 1 (7.7)                        |
| Adults (18-64 years)              |                                      | 3 (23.1)                       |
| Older adults (≥65)                |                                      | 1 (7.7)                        |
| Treatments <sup>a,c</sup>         | Trivalent influenza vaccine (TIV)    | 10 (76.9)                      |
|                                   | Quadrivalent influenza vaccine (QIV) | 4 (30.8)                       |
| Outcomes <sup>a</sup>             | Effectiveness                        | 2 (15.4)                       |
|                                   | Local and Systemic Reactogenicity    | 12 (92.3)                      |
|                                   | Adverse events                       | 10 (76.9)                      |

213 <sup>a</sup>Each study can fit into more than one category so the total percentage will not add up to 100%

214 <sup>b</sup>One study includes both infants/toddlers and children, and another includes both adults and seniors

215 <sup>c</sup>One study includes both TIV and QIV arms

## 216 RCTs in healthy children (<18 years old)

217  
218 Nine studies included infants/toddlers 6-36 months old and one study also included children and  
 219 adolescents (**Table 2**). None of these studies reported results on the effectiveness outcomes that  
 220 were relevant to our review and established *a priori*, however all of them reported on safety  
 221 outcomes.

222 **Table 2: Nine RCTs conducted in children (6 months – 17 years)**

| Author, Year                                            | Study period and countr(ies)                 | Treatment arms<br>Brand name<br>(manufacturer)<br>HA/strain<br>[dosing] | Mean age<br>(SD)  | Age range     | Sex<br>(overall %<br>female) | Vaccination history<br>(overall %<br>previously immunized) | ITT sample size | Outcome                                                 | Author reported conclusions                                                                                                                                                                                                                                          |
|---------------------------------------------------------|----------------------------------------------|-------------------------------------------------------------------------|-------------------|---------------|------------------------------|------------------------------------------------------------|-----------------|---------------------------------------------------------|----------------------------------------------------------------------------------------------------------------------------------------------------------------------------------------------------------------------------------------------------------------------|
| TRIVALENT AND QUADRIVALENT INFLUENZA VACCINES (TIV/QIV) |                                              |                                                                         |                   |               |                              |                                                            |                 |                                                         |                                                                                                                                                                                                                                                                      |
| Cioppa, 2011[10]                                        | October 2008 – March 2009<br><br>Belgium     | NR - TIV, <b>7.5-µg/strain</b> [2 x 0.25mL dose]                        | 20.0 months (7.0) | 6- <36 months | 43.5                         | NR                                                         | 25              | Local and Systemic reactogenicity<br><br>Adverse events | Reactogenicity of the 7.5-µg TIV/QIV formulations was slightly lower than for the corresponding 15-µg formulations.<br><br>The majority of unsolicited AEs were mild or moderate in severity and none of the SAEs was considered to be related to the study vaccine. |
|                                                         |                                              | Agrippal - TIV, <b>15-µg/strain</b> [2 x 0.5mL dose]                    | 15.0 months (8.8) | 6- <36 months | 43.5                         | NR                                                         | 22              |                                                         |                                                                                                                                                                                                                                                                      |
|                                                         |                                              | NR - QIV, <b>7.5-µg/strain</b> [2 x 0.25mL dose]                        | 18.0 months (8.9) | 6- <36 months | 43.5                         | NR                                                         | 25              |                                                         |                                                                                                                                                                                                                                                                      |
|                                                         |                                              | NR - QIV, <b>15-µg/strain</b> [2 x 0.5mL dose]                          | 15.2 months (7.8) | 6- <36 months | 43.5                         | NR                                                         | 28              |                                                         |                                                                                                                                                                                                                                                                      |
|                                                         |                                              | Vaxigrip (Sanofi Pasteur), <b>7.5-µg/strain</b> [2 x 0.25mL dose]       | 16.1 months (8.5) | 6- <36 months | 43.5                         | NR                                                         | 26              |                                                         |                                                                                                                                                                                                                                                                      |
| Skowronski, 2011[11]                                    | September 2008 – December 2008<br><br>Canada | Vaxigrip (Sanofi-Pasteur), <b>15-µg/strain</b> [2 x <b>0.5mL dose</b> ] | 13.2 months (5.1) | 6-23 months   | 53.2                         | 0                                                          | 124             | Local and Systemic reactogenicity<br><br>Adverse        | Local reactions generally were less common in infants than toddlers and more common with full                                                                                                                                                                        |

| Author, Year | Study period and countr(ies) | Treatment arms<br>Brand name<br>(manufacturer)<br>HA/strain<br>[dosing] | Mean age<br>(SD)        | Age range      | Sex<br>(overall %<br>female) | Vaccination history<br>(overall %<br>previously immunized) | ITT sample size | Outcome | Author reported conclusions                                                                                                                                                                                                                                                                                                                                                                                                                          |
|--------------|------------------------------|-------------------------------------------------------------------------|-------------------------|----------------|------------------------------|------------------------------------------------------------|-----------------|---------|------------------------------------------------------------------------------------------------------------------------------------------------------------------------------------------------------------------------------------------------------------------------------------------------------------------------------------------------------------------------------------------------------------------------------------------------------|
|              |                              | Vaxigrip (Sanofi-Pasteur),<br>15-µg/strain [2 x<br><b>0.25mL dose]</b>  | 12.8<br>months<br>(5.0) | 6-23<br>months | 53.2                         | 0                                                          | 128             | events  | <p>doses versus half doses, but none of these differences were significant.</p> <p>One serious adverse event was reported: a toddler in the half dose group was hospitalized with pneumonia 28 days after the first vaccination. The event was deemed unlikely related to the vaccine.</p> <p>Compared with 0.25-mL half-dosing, administration of 2 full 0.5-mL doses of trivalent inactivated influenza vaccine can increase antibody response</p> |

1  
2  
3  
4  
5  
6  
7  
8  
9  
10  
11  
12  
13  
14  
15  
16  
17  
18  
19  
20  
21  
22  
23  
24  
25  
26  
27  
28  
29  
30  
31  
32  
33  
34  
35  
36  
37  
38  
39  
40  
41  
42  
43  
44  
45  
46  
47

| Author, Year      | Study period and countr(ies) | Treatment arms<br>Brand name (manufacturer)<br>HA/strain [dosing]     | Mean age (SD)      | Age range   | Sex (overall % female) | Vaccination history (overall % previously immunized) | ITT sample size | Outcome                                                 | Author reported conclusions                                                                                                                                                                                                                                                                                          |
|-------------------|------------------------------|-----------------------------------------------------------------------|--------------------|-------------|------------------------|------------------------------------------------------|-----------------|---------------------------------------------------------|----------------------------------------------------------------------------------------------------------------------------------------------------------------------------------------------------------------------------------------------------------------------------------------------------------------------|
|                   |                              |                                                                       |                    |             |                        |                                                      |                 |                                                         | without increasing reactogenicity in previously unimmunized infants aged 6 to 11 months.                                                                                                                                                                                                                             |
| Langley, 2012[12] | November 2008 – August 2009  | Fluviral F1 (Sanofi-Pasteur), <b>7.5-µg/strain</b> [1 x 0.25 mL dose] | 18.2 months (9.06) | 6-35 months | 47.9                   | 42.6                                                 | 164             | Local and Systemic reactogenicity<br><br>Adverse events | Fluviral F1 group had 1 case of pneumonia resolved. Fluviral F2 group had 1 case of bronchial hyper-reactivity in resolving stage.<br><br>The 0.5-mL dose of the study vaccine, when administered to children aged 6–35 months, resulted in a modest but not statistically significant improvement in immunogenicity |
|                   | Canada                       | Fluviral F2 (Sanofi-Pasteur), <b>15-µg/strain</b> [1 x 0.5mL dose]    | 17.5 months (8.27) | 6-35 months | 47.9                   | 42.6                                                 | 167             |                                                         |                                                                                                                                                                                                                                                                                                                      |
|                   |                              | Vaxigrip (Sanofi-Pasteur), <b>7.5-µg/strain</b> [1 x 0.25 mL dose]    | 17.0 months (8.33) | 6-35 months | 47.9                   | 42.6                                                 | 43              |                                                         |                                                                                                                                                                                                                                                                                                                      |



| Author, Year        | Study period and countr(ies)                                                    | Treatment arms<br>Brand name<br>(manufacturer)<br>HA/strain<br>[dosing] | Mean age<br>(SD)   | Age range   | Sex<br>(overall %<br>female) | Vaccination history<br>(overall %<br>previously immunized) | ITT sample size | Outcome                                                 | Author reported conclusions                                                                                                                                                                                                                                                                                                                                  |
|---------------------|---------------------------------------------------------------------------------|-------------------------------------------------------------------------|--------------------|-------------|------------------------------|------------------------------------------------------------|-----------------|---------------------------------------------------------|--------------------------------------------------------------------------------------------------------------------------------------------------------------------------------------------------------------------------------------------------------------------------------------------------------------------------------------------------------------|
|                     |                                                                                 |                                                                         |                    |             |                              |                                                            |                 |                                                         | with clinically similar safety and reactogenicity compared with the 0.25-mL dose.                                                                                                                                                                                                                                                                            |
| Pavia-Ruz, 2013[13] | October 2008-March 2009<br><br>Hong Kong, Mexico, Taiwan, Thailand, and the USA | Fluarix (GSK),<br><b>15-µg/strain</b> [1 x 0.5mL dose]                  | 21.2 months (8.37) | 6-35 months | 51                           | 30.1                                                       | 1018            | Local and Systemic reactogenicity<br><br>Adverse events | The reactogenicity and safety profile of the study vaccine did not appear to be affected by doubling the dose.<br><br>One participant in the Flu-15µg group had two SAEs, (apnea and cyanosis) which were considered by the investigator to be possibly related to vaccination. The subject was hospitalized and the events resolved on the same day as they |
|                     |                                                                                 | Fluarix (GSK),<br><b>7.5-µg/strain</b> [1 x 0.25 mL dose]               | 21.2 months (8.03) | 6-35 months | 51                           | 30.1                                                       | 1018            |                                                         |                                                                                                                                                                                                                                                                                                                                                              |
|                     |                                                                                 | Fluzone (Sanofi-Pasteur),<br><b>7.5-µg/strain</b> [1 x 0.25 mL dose]    | 21.1 months (8.20) | 6-35 months | 51                           | 30.1                                                       | 1031            |                                                         |                                                                                                                                                                                                                                                                                                                                                              |

1  
2  
3  
4  
5  
6  
7  
8  
9  
10  
11  
12  
13  
14  
15  
16  
17  
18  
19  
20  
21  
22  
23  
24  
25  
26  
27  
28  
29  
30  
31  
32  
33  
34  
35  
36  
37  
38  
39  
40  
41  
42  
43  
44  
45  
46  
47

| Author, Year     | Study period and countr(ies) | Treatment arms<br>Brand name (manufacturer)<br>HA/strain [dosing]    | Mean age (SD) | Age range                    | Sex (overall % female) | Vaccination history (overall % previously immunized) | ITT sample size | Outcome                           | Author reported conclusions                                                                                                                                                                                                                                                                                                                                                        |
|------------------|------------------------------|----------------------------------------------------------------------|---------------|------------------------------|------------------------|------------------------------------------------------|-----------------|-----------------------------------|------------------------------------------------------------------------------------------------------------------------------------------------------------------------------------------------------------------------------------------------------------------------------------------------------------------------------------------------------------------------------------|
|                  |                              |                                                                      |               |                              |                        |                                                      |                 |                                   | occurred.                                                                                                                                                                                                                                                                                                                                                                          |
| Halasa, 2015[14] | 2010-2012<br><br>USA         | Fluzone (Sanofi Pasteur),<br><b>7.5-µg/strain</b> [1 x 0.25 mL dose] | 13.5          | 6-35 months,<br>12-35 months | 52                     | 13.2                                                 | 80              | Local and Systemic reactogenicity | No significant differences between the full-dose or half-dose groups for either the fully primed or naive cohorts for systemic reactions or local reactions when both seasons were combined.<br><br>The only significant difference in the 2011–2012 season was that 8 of 48 (16.7%) participants in the half-dose group compared with 32 of 96 (33.3%) in the full-dose group had |
|                  |                              | Fluzone (Sanofi Pasteur),<br><b>15-µg/strain</b> [1 x 0.5 mL dose]   | 14.5          |                              |                        |                                                      | 163             |                                   |                                                                                                                                                                                                                                                                                                                                                                                    |

| Author, Year    | Study period and countr(ies)                   | Treatment arms<br>Brand name<br>(manufacturer)<br>HA/strain<br>[dosing] | Mean age<br>(SD)         | Age range      | Sex<br>(overall %<br>female) | Vaccination history<br>(overall %<br>previously immunized) | ITT sample size | Outcome                           | Author reported conclusions                                                                                                                                                                                                                                                              |
|-----------------|------------------------------------------------|-------------------------------------------------------------------------|--------------------------|----------------|------------------------------|------------------------------------------------------------|-----------------|-----------------------------------|------------------------------------------------------------------------------------------------------------------------------------------------------------------------------------------------------------------------------------------------------------------------------------------|
|                 |                                                |                                                                         |                          |                |                              |                                                            |                 |                                   | increased redness at the injection site (P < .05).<br><br>No significant differences between the groups in AE, SAE, or onset of chronic medical conditions between the dose groups in either the naive or fully primed cohorts, and none of the SAEs were deemed related to the vaccine. |
| Phung, 2016[15] | September 2010-<br>January 2011<br><br>Finland | FLUAD (NR),<br>NR [1 x 0.5mL<br>dose]                                   | 68.7<br>months<br>(18)   | 6-35<br>months | 55.8                         | 85.7                                                       | 60              | Local and Systemic reactogenicity | <i>Trial protocol with no author conclusions.</i>                                                                                                                                                                                                                                        |
|                 |                                                | FLUAD (NR),<br>NR [1 x 0.25 mL<br>dose]                                 | 60.4<br>months<br>(23.2) | 6-35<br>months | 55.8                         | 85.7                                                       | 75              |                                   |                                                                                                                                                                                                                                                                                          |
|                 |                                                | Agrippal S1<br>(NR),                                                    | 68<br>months<br>(17.1)   | 6-35<br>months | 55.8                         | 85.7                                                       | 51              | Adverse events                    |                                                                                                                                                                                                                                                                                          |

1  
2  
3  
4  
5  
6  
7  
8  
9  
10  
11  
12  
13  
14  
15  
16  
17  
18  
19  
20  
21  
22  
23  
24  
25  
26  
27  
28  
29  
30  
31  
32  
33  
34  
35  
36  
37  
38  
39  
40  
41  
42  
43  
44  
45  
46  
47

| Author, Year   | Study period and countr(ies)                         | Treatment arms<br>Brand name (manufacturer)<br>HA/strain [dosing] | Mean age (SD)     | Age range   | Sex (overall % female) | Vaccination history (overall % previously immunized) | ITT sample size | Outcome                           | Author reported conclusions                                                                                                                                                                               |
|----------------|------------------------------------------------------|-------------------------------------------------------------------|-------------------|-------------|------------------------|------------------------------------------------------|-----------------|-----------------------------------|-----------------------------------------------------------------------------------------------------------------------------------------------------------------------------------------------------------|
|                |                                                      | NR [1 x 0.5mL dose]                                               |                   |             |                        |                                                      |                 |                                   |                                                                                                                                                                                                           |
|                |                                                      | Agrippal S1 (NR),<br>NR [1 x 0.25mL dose]                         | 32.4 months (1.9) | 6-35 months | 55.8                   | 85.7                                                 | 11              |                                   |                                                                                                                                                                                                           |
| Jain, 2017[16] | 2014-2015 Influenza Season<br><br>USA and New Mexico | Flulaval (GSK),<br>15-µg/strain [1 x 0.5mL dose]                  | 19.7 months (8.7) | 6-35 months | 46.9                   | 57.5                                                 | 1013            | Local and Systemic reactogenicity | None of the febrile seizures or the SAEs were considered by the investigator to be related to vaccination.                                                                                                |
|                |                                                      | Fluzone (Sanofi Pasteur),<br>7.5-µg/strain [1 x 0.25 mL dose]     | 19.9 months (8.9) | 6-35 months | 46.9                   | 57.5                                                 | 1028            | Adverse events                    | Double-dose vaccines may improve protection against influenza B in some young children and simplifies annual influenza vaccination by allowing the same vaccine dose to be used for all eligible children |

| Author, Year    | Study period and countr(ies)                 | Treatment arms<br>Brand name<br>(manufacturer)<br>HA/strain<br>[dosing]           | Mean age<br>(SD)            | Age range           | Sex<br>(overall %<br>female) | Vaccination history<br>(overall %<br>previously immunized) | ITT sample size | Outcome                           | Author reported conclusions                                                                                                                                                                                                                                                                                                                            |
|-----------------|----------------------------------------------|-----------------------------------------------------------------------------------|-----------------------------|---------------------|------------------------------|------------------------------------------------------------|-----------------|-----------------------------------|--------------------------------------------------------------------------------------------------------------------------------------------------------------------------------------------------------------------------------------------------------------------------------------------------------------------------------------------------------|
|                 |                                              |                                                                                   |                             |                     |                              |                                                            |                 |                                   | and adults.                                                                                                                                                                                                                                                                                                                                            |
| Ojeda, 2019[17] | December 2017-<br>January 2018<br><br>Mexico | Vaxigrip Tetra<br>(Sanofi Pasteur)<br><b>PFS 15-µg/strain</b><br>[1 x 0.5mL dose] | NR<br>(6 months – 17 years) | 6 months – 17 years | 46.4                         | NR                                                         | 149             | Local and Systemic reactogenicity | Solicited systemic reactions were reported in more infants aged 6 – 35 months in the MDV group than in the PFS group however this was not clinically significant.<br><br>AE not considered related to a study vaccine.<br><br>There were no differences in reactogenicity or safety between the two vaccine formats. These results showed that the MDV |
|                 |                                              | Vaxigrip Tetra<br>(Sanofi Pasteur)<br><b>MDV 15-µg/strain</b> [1 x 0.5mL dose]    | NR<br>(6 months – 17 years) | 6 months – 17 years | 46.4                         | NR                                                         | 153             | Adverse events                    |                                                                                                                                                                                                                                                                                                                                                        |

1  
2  
3  
4  
5  
6  
7  
8  
9  
10  
11  
12  
13  
14  
15  
16  
17  
18  
19  
20  
21  
22  
23  
24  
25  
26  
27  
28  
29  
30  
31  
32  
33  
34  
35  
36  
37  
38  
39  
40  
41  
42  
43  
44  
45  
46  
47

| Author, Year        | Study period and countr(ies) | Treatment arms<br>Brand name (manufacturer)<br>HA/strain [dosing] | Mean age (SD)      | Age range   | Sex (overall % female) | Vaccination history (overall % previously immunized) | ITT sample size | Outcome                           | Author reported conclusions                                                                                                                                                                                       |
|---------------------|------------------------------|-------------------------------------------------------------------|--------------------|-------------|------------------------|------------------------------------------------------|-----------------|-----------------------------------|-------------------------------------------------------------------------------------------------------------------------------------------------------------------------------------------------------------------|
|                     |                              |                                                                   |                    |             |                        |                                                      |                 |                                   | format of QIV was as safe and immunogenic as the PFS format in infants, children, and adolescents. These findings support the use of MDV QIV as a resource-saving alternative for seasonal influenza vaccination. |
| Robertson, 2019[18] | September 2016 – March 2017  | Fluzone (Sanofi Pasteur)<br><b>15-µg/strain</b><br>[1x0.5mL dose] | 20.5 months (8.55) | 6-35 months | 49.7                   | 47.25                                                | 992             | Local and Systemic reactogenicity | No significant differences between full- and half-dose groups.                                                                                                                                                    |
|                     | USA                          | Fluzone (Sanofi Pasteur)<br><b>7.5-µg/strain</b><br>[1x0.25 dose] | 20.4 months (8.75) | 6-35 months | 49.7                   | 47.25                                                | 949             | Adverse events                    | AE leading to study discontinuation/S<br>AE not considered vaccine-related.<br><br>A full dose vaccine was immunogenic and                                                                                        |

| Author, Year | Study period and countr(ies) | Treatment arms<br>Brand name (manufacturer)<br>HA/strain [dosing] | Mean age (SD) | Age range | Sex (overall % female) | Vaccination history (overall % previously immunized) | ITT sample size | Outcome | Author reported conclusions                                                                   |
|--------------|------------------------------|-------------------------------------------------------------------|---------------|-----------|------------------------|------------------------------------------------------|-----------------|---------|-----------------------------------------------------------------------------------------------|
|              |                              |                                                                   |               |           |                        |                                                      |                 |         | had a safety profile comparable to that of a half dose, with no new safety concerns observed. |

**Abbreviations:** AE – adverse events; GMR - geometric mean ratio; GMFR – geometric mean fold rise; GMT - geometric mean antibody titer; HA - hemagglutinin; HAI - hemagglutination inhibition; ID – intradermal; IM – intramuscular; ITT – intent-to-treat; MDV – multi-dose vials, n – number of people with condition, N – sample size of treatment arm, NR – not reported, PFS – prefilled dose, SAEs – serious adverse events

For peer review only

## 226 **Safety outcomes**

### 227 Trivalent influenza vaccines

228 Six of the included RCTs assessed trivalent influenza vaccines (TIV) in young children (6-36  
229 months) and reported on local and systemic reactogenicity outcomes and other adverse  
230 events.[10-14, 19] Two RCTs compared the administration of full (0.5mL) and half (0.25mL)  
231 doses of the same standard 15µg/strain vaccine.[11, 19] The first RCT compared two full versus  
232 two half doses of TIV in previously unimmunized infants (6-11 months) and toddlers (12-23  
233 months) using Vaxigrip (15µg/strain).[11] The study found that in the infants group, two full 0.5-  
234 mL doses of vaccine did not increase reactogenicity. Local reactions were less common in  
235 infants than toddlers and more common with full doses versus half doses, but the differences  
236 were not statistically significant. An identified clinical trial registry compared a single  
237 intramuscular injection of 0.5mL to 0.25mL of FLUAD or Agrippal and showed comparable  
238 numbers of children with reactogenicity outcomes and other adverse events across the groups,  
239 but no significance levels or conclusions were provided by the investigators upon contact.[19]

240  
241 The objective of three of the included RCTs was to examine the impact of administering the full  
242 adult dose of 15µg/strain vaccines compared with the usual children's dose of 7.5µg/strain in  
243 infants and toddlers.[12-14] A multicenter RCT was conducted in Canada assessing the safety of  
244 full-dose Fluviral TIV (15µg/strain) compared with the half-dose (7.5µg/strain) and an active  
245 comparator Vaxigrip (7.5µg/strain).[12] Compared with the half-dose, the full-dose vaccine  
246 resulted in clinically similar reactogenicity and safety. A similar three-arm RCT to assess the use  
247 of Fluarix at two different dose levels (7.5µg/strain and 15µg/strain) compared to an established  
248 control vaccine Fluzone (7.5µg/strain) also found the reactogenicity and safety profile of Fluarix  
249 did not appear to be affected by doubling the dose, but one participant in the 15µg group had two  
250 serious adverse events (apnea and cyanosis) that were considered by the investigator to be  
251 possibly related to vaccination.[13] A third multicenter RCT compared the 15 µg/strain  
252 formulation to the 7.5µg/strain formulation of Fluzone (Sanofi Pasteur) administered to young  
253 children across multiple influenza seasons.[14] This study also found no statistically significant  
254 differences between the full-dose or half-dose groups for systemic reactions, local reactions or  
255 adverse events when both seasons were combined; however, in the 2011–2012 season, 8 of 48  
256 (16.7%) participants in the half-dose group compared with 32 of 96 (33.3%) in the full-dose  
257 group had increased redness at the injection site ( $P < .05$ ).

258  
259 Cioppa et al. (2009) was the only trial that compared the safety and tolerability of both TIV and  
260 QIV vaccine formulations.[10] The vaccine arms of interest were a QIV 15-µg/strain, TIV 15-  
261 µg/strain, QIV 7.5-µg/strain, TIV 7.5-µg/strain, and a control Vaxigrip TIV 7.5-µg/strain  
262 vaccine. Reactogenicity of the 7.5-µg TIV/QIV formulations was slightly lower than for the  
263 corresponding 15-µg formulations, but there was no difference in reactogenicity between TIV  
264 and QIV vaccines.

### 265 266 Quadrivalent influenza vaccines

267 Four of the included RCTs evaluated quadrivalent influenza vaccines (QIV) in children.[10, 16-  
268 18] All of the studies reported reactogenicity outcomes and other adverse events. The Cioppa et  
269 al. (2009) RCT reported both TIV and QIV vaccines and the results are reported above.[10] Two  
270 studies compared full-dose QIV to pediatric 7.5µg/strain Fluzone. In the first RCT, full dose  
271 Fluzone had a similar safety profile to half-dose Fluzone with a single adverse event being



1  
2  
3 272 attributed to the study vaccine.[18] Similarly, the second study found that full-dose Flulaval may  
4 273 improve protection against influenza in some young children when compared to low-dose  
5 274 Fluzone, and in this RCT, none of the adverse events were considered to be study-related as  
6 275 reported by the investigator.[16] The final trial evaluated Vaxigrip Tetra (15µg/strain)  
7 276 administered to children and adolescents in two different formats.[17] Vaxigrip administered as a  
8 277 single dose using a pre-filled syringe (PFS) was compared to a 10-dose multi-dose vial (MDV).  
9 278 Systemic reactions were reported in more infants aged 6 – 35 months in the MDV group than in  
10 279 the PFS group; however this difference was not clinically significant. The authors concluded that  
11 280 there was no difference in reactogenicity or safety between the two vaccine formats in infants,  
12 281 children, and adolescents.  
13  
14 282

### 15 283 **RCTs in healthy adults (≥18 years old)**

16 284 One RCT included healthy adults over 18 years, two studies included healthy adults from 18-45  
17 285 and 18-65 years old, and one study included older healthy adults (≥ 65 years) (**Table 3**). Two  
18 286 studies reported on effectiveness outcomes and three on reactogenicity and other adverse events.  
19 287 All four RCTs evaluated Fluzone QIV.  
20  
21  
22  
23  
24  
25  
26  
27  
28  
29  
30  
31  
32  
33  
34  
35  
36  
37  
38  
39  
40  
41  
42  
43  
44  
45  
46  
47  
48  
49  
50  
51  
52  
53  
54  
55  
56  
57  
58  
59  
60

288 **Table 3: Four RCTs conducted in adults ( $\geq 18$  years old)**

| Author, Year                          | Study period and countr(ies)            | Treatment arms<br>Brand name<br>(manufacturer)<br>HA/strain<br>[dosing]              | Mean age<br>(SD) | Age range | Sex<br>(overall %<br>female) | Vaccination history<br>(overall %<br>previously immunized) | ITT sample size | Relevant Outcomes                                             | Author reported conclusions                                                                                                                                                                                                                                                                                                                                |
|---------------------------------------|-----------------------------------------|--------------------------------------------------------------------------------------|------------------|-----------|------------------------------|------------------------------------------------------------|-----------------|---------------------------------------------------------------|------------------------------------------------------------------------------------------------------------------------------------------------------------------------------------------------------------------------------------------------------------------------------------------------------------------------------------------------------------|
| QUADRIVALENT INFLUENZA VACCINES (QIV) |                                         |                                                                                      |                  |           |                              |                                                            |                 |                                                               |                                                                                                                                                                                                                                                                                                                                                            |
| Kramer, 2006 [20]                     | October 2004 – November 2004<br><br>USA | Fluzone (Aventis Pasteur),<br><b>15-<math>\mu</math>g/strain</b> [1 x 0.5mL dose]    | NR (>18 years)   | >18 years | NR                           | NR                                                         | 222             | Lab-confirmed influenza (one patient receiving the full dose) | There was no significant difference between the full-dose and half-dose groups in the diagnosis of influenza or in the proportion of participants self-reporting four or more symptoms consistent with influenza-like illness.<br><br>No adverse events were noted by participants from either group or reported to the IRB during the course of the study |
|                                       |                                         | Fluzone (Aventis Pasteur),<br><b>7.5-<math>\mu</math>g/strain</b> [1 x 0.25 mL dose] | NR (>18 years)   | >18 years | NR                           | NR                                                         | 222             | Influenza-like illness<br><br>Adverse events                  |                                                                                                                                                                                                                                                                                                                                                            |

| Author, Year      | Study period and countr(ies)  | Treatment arms<br>Brand name (manufacturer)<br>HA/strain [dosing]     | Mean age (SD)      | Age range   | Sex (overall % female) | Vaccination history (overall % previously immunized) | ITT sample size | Relevant Outcomes                                   | Author reported conclusions                                                                                                                                                                                                                                                                                                                                                                                      |
|-------------------|-------------------------------|-----------------------------------------------------------------------|--------------------|-------------|------------------------|------------------------------------------------------|-----------------|-----------------------------------------------------|------------------------------------------------------------------------------------------------------------------------------------------------------------------------------------------------------------------------------------------------------------------------------------------------------------------------------------------------------------------------------------------------------------------|
| Engler, 2008 [21] | November 2004 – December 2004 | Fluzone (Aventis Pasteur),<br><b>15-µg/strain</b> [1 x 0.5mL dose]    | NR (18 – 64 years) | 18-64 years | 43.4                   | 0                                                    | 554             | Influenza-like illness<br>Hospital/ER visits        | The relative risk of medical visits and hospitalizations for influenza-like illnesses were similar in the half- and full-dose group regardless of age, and there was no evidence of ILI symptom differences by sex or dose during the 21 days after immunizations.<br><br>Although injection site pain was greater for full- vs half-dose (19.9% vs 14.4%; p=.01), when analyzed for clinically significant pain |
|                   | USA                           | Fluzone (Aventis Pasteur),<br><b>7.5-µg/strain</b> [1 x 0.25 mL dose] | NR (18 – 64 years) | 18-64 years | 43.4                   | 0                                                    | 556             | Local and Systemic reactogenicity<br>Adverse events |                                                                                                                                                                                                                                                                                                                                                                                                                  |

1  
2  
3  
4  
5  
6  
7  
8  
9  
10  
11  
12  
13  
14  
15  
16  
17  
18  
19  
20  
21  
22  
23  
24  
25  
26  
27  
28  
29  
30  
31  
32  
33  
34  
35  
36  
37  
38  
39  
40  
41  
42  
43  
44  
45  
46  
47

| Author, Year      | Study period and countr(ies) | Treatment arms<br>Brand name (manufacturer)<br>HA/strain [dosing] | Mean age (SD)    | Age range   | Sex (overall % female) | Vaccination history (overall % previously immunized) | ITT sample size | Relevant Outcomes                 | Author reported conclusions                                                                                                                                                                                                                        |
|-------------------|------------------------------|-------------------------------------------------------------------|------------------|-------------|------------------------|------------------------------------------------------|-----------------|-----------------------------------|----------------------------------------------------------------------------------------------------------------------------------------------------------------------------------------------------------------------------------------------------|
|                   |                              |                                                                   |                  |             |                        |                                                      |                 |                                   | <p>levels significant dose-dependent pain differences were not identified.</p> <p>Joint and/or muscle pain were significantly different (p=.02 and p=.03, respectively) by dose.</p> <p>No other adverse event differed significantly by dose.</p> |
| Belshe, 2007 [22] | NR<br>USA                    | Fluzone (Sanofi-Pasteur),<br><b>15-µg/strain</b> [1 x 0.5mL dose] | 31.5 years (9.6) | 18-49 years | 71.2                   | 0                                                    | 31              | Local and Systemic reactogenicity | Intradermal (ID) vaccine induced significantly more local inflammatory response than Intramuscular (IM) vaccine but                                                                                                                                |
|                   |                              | Fluzone (Sanofi-Pasteur),                                         | 31.2 years (9.4) | 18-49 years | 71.2                   | 0                                                    | 32              |                                   |                                                                                                                                                                                                                                                    |

| Author, Year  | Study period and countr(ies) | Treatment arms<br>Brand name (manufacturer)<br>HA/strain [dosing]                | Mean age (SD)     | Age range   | Sex (overall % female) | Vaccination history (overall % previously immunized) | ITT sample size | Relevant Outcomes                 | Author reported conclusions                                                                                                                   |
|---------------|------------------------------|----------------------------------------------------------------------------------|-------------------|-------------|------------------------|------------------------------------------------------|-----------------|-----------------------------------|-----------------------------------------------------------------------------------------------------------------------------------------------|
|               |                              | <b>9-<math>\mu</math>g/strain</b> [1 x 0.3mL dose]                               |                   |             |                        |                                                      |                 |                                   | this did not translate into an increased immune response for ID vaccines compared to IM (primary comparison of this study was ID vs IM doses) |
|               |                              | Fluzone (Sanofi-Pasteur),<br><b>6-<math>\mu</math>g/strain</b> [1 x 0.2mL dose]  | 30.1 years (10.3) | 18-49 years | 71.2                   | 0                                                    | 31              |                                   |                                                                                                                                               |
|               |                              | Fluzone (Sanofi-Pasteur),<br><b>3-<math>\mu</math>g/strain</b> [1 x 0.1mL dose]  | 31.9 years (10.3) | 18-49 years | 71.2                   | 0                                                    | 31              |                                   |                                                                                                                                               |
| Chi, 2010[23] | August 2007-2008<br><br>USA  | Fluzone (Sanofi Pasteur),<br><b>15-<math>\mu</math>g/strain</b> [1 x 0.5mL dose] | 75.6 years (6.8)  | >65 years   | 17.8                   | 94.6                                                 | 65              | Local and Systemic reactogenicity | The two SAEs were acute coronary syndrome and appendicitis and neither were judged to be related to influenza vaccination                     |
|               |                              | Fluzone (Sanofi Pasteur),<br><b>9-<math>\mu</math>g/strain</b> [1 x 0.3mL dose]  | 75.2 years (7.7)  | >65 years   | 17.8                   | 94.6                                                 | 64              | Adverse events                    |                                                                                                                                               |

**Abbreviations:** AE – adverse events, GMT - geometric mean antibody titer; HA - hemagglutinin; ID – intradermal; ILI – influenza-like illness; IM – intramuscular; MDV – multi-dose vials, n – number of people with condition, N – sample size of treatment arm, NR – not reported, PFS – prefilled syringe, SAE – serious adverse events

### 291 **Effectiveness outcomes**

292 Two of the included RCTs that examined the same vaccine (Fluzone manufactured by Aventis  
293 Pasteur) in healthy adult populations reported effectiveness outcomes. Only one study by Kramer  
294 et al. included lab-confirmed influenza infection [20], two reported influenza like illness, [20,  
295 21] and one reported hospitalizations or emergency room visits after vaccination [21]. The RCT  
296 by Kramer et al. (2006) found that 3.6% of participants receiving a 15- $\mu$ g/strain dose of vaccine  
297 reported influenza like illness compared to 6.8% of participants that received a 7.5- $\mu$ g/strain  
298 dose.[20] However, only one participant that received the full dose 15- $\mu$ g/strain was confirmed  
299 via laboratory analysis to have influenza, and no patients in the half dose arm got lab  
300 confirmation. The authors concluded that half-dose and full-dose vaccinations appear to be  
301 similarly effective for influenza like illness and similar symptom surveys between both groups  
302 but acknowledge that further studies examining immunogenicity are needed to confirm.

304 A similar RCT by Engler et al. (2008) that compared a 15- $\mu$ g/strain dose of Fluzone vaccine to a  
305 7.5- $\mu$ g/strain dose found equal proportions of participants reporting influenza like illness (9.7%  
306 vs 9.9%) and hospitalizations or emergency room visits (0.3% v 0.2%).[21] The authors found  
307 the relative risk of medical visits or hospitalizations between both groups was the same even  
308 when adjusting for age and that age, sex, nor dose had an influence on the severity of influenza  
309 like illness symptoms.

### 311 **Safety outcomes**

312 Three of the included studies in adult populations reported adverse events that occurred during  
313 the trial while one RCT indicated that no adverse events were recorded for the duration of their  
314 trial.[20-23] All three studies reporting adverse events compared different doses of Fluzone  
315 vaccine including 3- $\mu$ g, 6- $\mu$ g, 7.5- $\mu$ g, 9- $\mu$ g, and 15- $\mu$ g per strain doses.

317 Two of the studies were carried out in healthy adult populations and one RCT was conducted in  
318 older healthy adults (>60 years of age).[21-23] One RCT found that joint or muscle pain  
319 following vaccination was statistically significantly higher in the full dose (15- $\mu$ g) group  
320 compared to the half-dose (7.5- $\mu$ g) group and that while injection site pain initially appeared to  
321 be statistically significantly higher in the full dose group, when adjusted to include only  
322 clinically significant pain levels (>3 out of 5 on a visual analogue scale) the difference was no  
323 longer statistically significant.[21] The RCT found no differences in occurrence or severity of  
324 any other adverse effects. Similarly, one RCT comparing four different doses of Fluzone (3- $\mu$ g,  
325 6- $\mu$ g, 9- $\mu$ g, and 15- $\mu$ g per strain) did not report any differences between the IM vaccination  
326 groups.[22] Finally, the RCT in older adults also found no difference in the occurrence or  
327 severity of adverse events in the low dose (9- $\mu$ g) versus high dose (15- $\mu$ g) group and found no  
328 serious adverse events that were considered related to the vaccine.[23]

## 330 **DISCUSSION**

331 PHAC commissioned this rapid scoping review to identify the evidence for efficacy and safety of  
332 fractional influenza vaccine dosing for intramuscular administration of seasonal influenza  
333 vaccines in healthy individuals of all ages that have been evaluated in human trials. Thirteen  
334 RCTs published between 2006 and 2019 comparing standard/full-dose and half/low-dose  
335 vaccines were included in this scoping review after a comprehensive search of three electronic

1  
2  
3 336 databases, trial registries and references of relevant systematic reviews. The majority of the  
4 337 included RCTs were conducted in children and evaluated trivalent influenza vaccines (TIV).  
5 338 In young, healthy children, there were no effectiveness outcomes of interest reported. However,  
6 339 local reactogenicity, systemic reactogenicity and adverse events were comparable across the full-  
7 340 dose and half-dose TIV and QIV vaccine arms. In addition, the authors of one RCT in children  
8 341 and adolescents that compared full-dose QIV using pre-filled syringes (PFS) versus multi-dose  
9 342 vials (MDV) also found no statistically significant differences in safety outcomes between  
10 343 administration formats. In healthy adults (including older adults), half-dose QIV was considered  
11 344 equally effective as high-dose in the two RCTs that assessed clinical effectiveness. Safety  
12 345 profiles were similar across groups in all 4 RCTs.  
13 346

14 347 A full systematic review with meta-analysis based on the studies and results of this scoping  
15 348 review was conducted by the NACI and the report was published in January of 2021.[3] Briefly,  
16 349 the report found that there is some, but still insufficient, evidence that fractional doses of  
17 350 influenza vaccine provided via the intramuscular route are effective and immunogenic in healthy  
18 351 individuals. NACI concludes that since many of those at high risk of influenza (e.g., adults 65  
19 352 years of age and older, individuals with specific underlying chronic health conditions) may have  
20 353 a lower immune response to influenza vaccination already (due to immunosenescence in older  
21 354 adults or a condition that alters immune function), it is important to ensure that those at high risk  
22 355 continue to receive the full dose of influenza vaccine. With regard to the safety of intramuscular  
23 356 seasonal fractional doses of influenza vaccines, there is fair evidence that fractional doses do not  
24 357 result in significant differences compared to full dose with regard to severe adverse effects post-  
25 358 influenza vaccination. Readers are encouraged to reference the full NACI report on the Health  
26 359 Canada website [3].  
27 360

### 361 **Strengths and limitations**

362 A strength of this rapid scoping review was that it was conducted within a 6-week timeline and  
363 the methods were tailored to provide results to the stakeholders within 4 weeks. We also did not  
364 restrict the search dates and study screening was completed independently by two reviewers. We  
365 developed a comprehensive search using three major databases, and searched the grey literature.  
366 We engaged with the NACI stakeholder group, who provided input on the PICO criteria, and  
367 funded this rapid scoping review.  
368

369 We were limited by the lack of studies providing objective outcome data. Only one RCT by  
370 Kramer et al. reported the objective outcome “lab confirmed influenza”, and the other RCT by  
371 Engler only reported the outcome “influenza like illness” [20, 21]. Since a 2014 narrative review  
372 found that less than 25% of cases diagnosed by physicians as influenza like illness were later  
373 laboratory proven influenza cases [24], we are lacking RCTs examining fractional dosing of IM  
374 influenza immunization. Further, twelve dose-sparing RCTs were not included because they did  
375 not provide sufficient data, and did not include vaccines that were deemed of interest to the  
376 stakeholders. Another limitation was that only studies published in the English language were  
377 included, and data extraction was conducted by one abstractor and one verifier. Since this was a  
378 scoping review, we did not appraise the methodological quality of the included studies.[25]  
379

### 380 **Future research**

1  
2  
3 381 Dose-sparing approaches such as intradermal (ID) immunisation vaccination exhibits similar, or  
4 382 even enhanced, immunogenicity, when using a fractional dose only, as compared to  
5 383 intramuscular or subcutaneous immunisation, and should be explored in future scoping  
6 384 reviews.[26]  
7  
8 385

## 9 386 **CONCLUSIONS**

10 387 In our scoping review, we found 13 RCTs on the efficacy and safety of fractional doses of  
11 388 influenza vaccine provided via the intramuscular route to healthy adults and children. These  
12 389 studies were used to inform a systematic review with meta-analysis which were commissioned  
13 390 by the PHAC. We found that due to the low number of studies in healthy adults, namely one  
14 391 study assessing laboratory confirmed influenza and two evaluating influenza-like illness in  
15 392 adults, there remains a need for further evaluation of the clinical effectiveness of IM dose-  
16 393 sparing strategies using vaccines currently available in this population.  
17  
18  
19  
20  
21  
22  
23  
24  
25  
26  
27  
28  
29  
30  
31  
32  
33  
34  
35  
36  
37  
38  
39  
40  
41  
42  
43  
44  
45  
46  
47  
48  
49  
50  
51  
52  
53  
54  
55  
56  
57  
58  
59  
60



1  
2  
3 394 **LIST OF ABBREVIATIONS**

4 395 PHAC – Public Health Agency of Canada

5 396 CIHR – Canadian Institutes of Health Research

6 397 DSEN – Drug Safety and Effectiveness Network

7 398 MAGIC – Methods and Application Group in Indirect Comparisons

8 399 PRISMA-ScR – Preferred Reporting Items for Systematic Reviews and Meta-analysis extension  
9 400 to scoping reviews

10 401 ICU – Intensive Care Unit

11 402 RCT – Randomized controlled trials

12 403 NRCTs – non-randomized controlled trials

13 404 TIV – Trivalent Influenza Vaccine

14 405 AE – Adverse Events

15 406 SAE – Serious adverse events

16 407 QIV – Quadrivalent Influenza Vaccine

17 408 PFS – Pre-filled syringe

18 409 MDV – Multi-dose vial

19 410

20 411 **DECLARATIONS**

21 412 **Ethics approval and consent to participate**

22 413 Not applicable

23 414 **Consent for publication**

24 415 Not applicable

25 416 **Availability of data and materials**

26 417 The dataset(s) supporting the conclusions of this article is(are) included within the article (and its  
27 418 additional file(s)).

28 419 **Competing interests**

29 420 The authors have no competing interests to declare.

30 421 **Funding**

31 422 This work was supported through the Drug Safety and Effectiveness Network funded by the  
32 423 Canadian Institutes of Health Research, the funders had no involvement in the design, conduct,  
33 424 or publication of this study. SES is funded by a Tier 1 Canada Research Chair in Knowledge  
34 425 Translation and the Mary Trimmer Chair in Geriatric Medicine; ACT is funded by a Tier 2  
35 426 Canada Research Chair in Knowledge Synthesis.

36 427 **Open Access**

37 428 This is an Open Access article distributed in accordance with the Creative Commons Attribution  
38 429 Non Commercial (CC BY-NC 4.0) license, which permits others to distribute, remix, adapt,  
39 430 build upon this work non-commercially, and license their derivative works on different terms,  
40 431 provided the original work is properly cited and the use is non-commercial. See:

41 432 <http://creativecommons.org/licenses/by-nc/4.0/>

42 433 **Authors' contributions**

43 434 CL wrote and revised the final manuscript. JA and PR screened citations and full-text articles,  
44 435 abstracted and verified data, interpreted results and wrote the first draft manuscript. CW and NR  
45 436 screened citations and full-text articles, abstracted data, and reviewed the manuscript. SES and  
46 437 ACT developed the protocol, obtained funding, interpreted results, and edited the manuscript.

1  
2  
3 438 **Acknowledgements**

4 439 The authors would like to thank Jessie McGowan for her assistance in developing literature  
5 440 searches, Tamara Radar for PRESS of literature search, Alissa Epworth for her assistance  
6 441 executing searches and retrieving articles, and Navjot Mann for her assistance in contacting  
7 442 author's and formatting this manuscript.  
8 443

9 444 **Additional files**

10 445 **File Format:** Microsoft Word (.docx)

11 446 **Title of Data:** Additional File 1 (Appendices 1-7)

12 447 **Description of Data:** The appendices include the following additional information:

13 448 Appendix 1 – MEDLINE search strategy

14 449 Appendix 2 – EMBASE search strategy

15 450 Appendix 3 – Cochrane search strategy

16 451 Appendix 4 – List of eligible vaccines

17 452 Appendix 5 – Excluded dose-sparing studies

18 453 Appendix 6 – Study and patient data

19 454 Appendix 7 – Treatment and outcome data  
20 455

21 456 **FIGURE LEGEND**

22 457 Figure 1. Flow chart of studies included in the review

23 458 Study flow diagram.  
24  
25  
26  
27  
28  
29  
30  
31  
32  
33  
34  
35  
36  
37  
38  
39  
40  
41  
42  
43  
44  
45  
46  
47  
48  
49  
50  
51  
52  
53  
54  
55  
56  
57  
58  
59  
60

1  
2  
3  
459 **REFERENCES**

- 460 1. PHAC. Seasonal Influenza Vaccination Coverage in Canada, 2019-2020. 2020.
- 461 2. PHAC. Canadian Immunization Guide Chapter on Influenza and Statement on Seasonal  
462 Influenza Vaccine for 2019–2020. 2019.
- 463 3. PHAC. Recommendations on fractional influenza vaccine dosing. 2021.  
464 [https://www.canada.ca/en/public-health/services/immunization/national-advisory-committee-on-](https://www.canada.ca/en/public-health/services/immunization/national-advisory-committee-on-immunization-naci/recommendations-fractional-influenza-vaccine-dosing.html)  
465 [immunization-naci/recommendations-fractional-influenza-vaccine-dosing.html](https://www.canada.ca/en/public-health/services/immunization/national-advisory-committee-on-immunization-naci/recommendations-fractional-influenza-vaccine-dosing.html)
- 466 4. Peters MDJ, Marnie C, Tricco AC, et al. Updated methodological guidance for the  
467 conduct of scoping reviews. *JBIM Evid Synth*. 2020;18(10):2119-26.
- 468 5. World Health Organization AfHPaSR. Rapid reviews to strengthen health policy and  
469 systems: a practical guide 2017. Available from: [https://www.who.int/alliance-](https://www.who.int/alliance-hpsr/resources/publications/rapid-review-guide/en/)  
470 [hpsr/resources/publications/rapid-review-guide/en/](https://www.who.int/alliance-hpsr/resources/publications/rapid-review-guide/en/).
- 471 6. Tricco AC, Lillie E, Zarin W, et al. PRISMA Extension for Scoping Reviews (PRISMA-  
472 ScR): Checklist and Explanation. *Ann Intern Med*. 2018;169(7):467-73.
- 473 7. Rubin LG, Levin MJ, Ljungman P, et al. 2013 IDSA Clinical Practice Guideline for  
474 Vaccination of the Immunocompromised Host. *Clin Infect Dis*. 2013;58(3):e44-e100.
- 475 8. Hervé C, Laupèze B, Del Giudice G, et al. The how's and what's of vaccine  
476 reactivity. *npj Vaccines*. 2019;4(1):39.
- 477 9. Synthesi.SR. Toronto, Canada: Knowledge Translation Program, St. Michael's Hospital;  
478 2012.
- 479 10. Della Cioppa G, Vesikari T, Sokal E, et al. Trivalent and quadrivalent MF59®-  
480 adjuvanted influenza vaccine in young children: a dose-and schedule-finding study. *Vaccine*.  
481 2011;29(47):8696-704.
- 482 11. Skowronski DM, Hottes TS, Chong M, et al. Randomized controlled trial of dose  
483 response to influenza vaccine in children aged 6 to 23 months. *Pediatrics*. 2011;128(2):e276-89.
- 484 12. Langley JM, Vanderkooi OG, Garfield HA, et al. Immunogenicity and safety of 2 dose  
485 levels of a thimerosal-free trivalent seasonal influenza vaccine in children aged 6–35 months: a  
486 randomized, controlled trial. *J Pediatric Infect Dis Soc*. 2012;1(1):55-63.
- 487 13. Pavia-Ruz N, Angel Rodriguez Weber M, Lau Y-L, et al. A randomized controlled study  
488 to evaluate the immunogenicity of a trivalent inactivated seasonal influenza vaccine at two  
489 dosages in children 6 to 35 months of age. *Hum Vaccin Immunother*. 2013;9(9):1978-88.
- 490 14. Halasa NB, Gerber MA, Berry AA, et al. Safety and immunogenicity of full-dose  
491 trivalent inactivated influenza vaccine (TIV) compared with half-dose TIV administered to  
492 children 6 through 35 months of age. *J Pediatric Infect Dis Soc*. 2015;4(3):214-24.
- 493 15. Clinical Trial Results: A Phase IIIB, observer-blind, randomized, parallel groups,  
494 extension study to evaluate the immunogenicity and safety following a single intramuscular dose  
495 of FLUAD or Agrippal S1 influenza vaccines in healthy children previously vaccinated in the  
496 V70P5 study. [Internet]. 2016 [cited July 6, 2020]. Available from:  
497 <https://www.clinicaltrialsregister.eu/ctr-search/trial/2010-021644-18/results>.
- 498 16. Jain VK, Domachowske JB, Wang L, et al. Time to change dosing of inactivated  
499 quadrivalent influenza vaccine in young children: evidence from a phase III, randomized,  
500 controlled trial. *J Pediatric Infect Dis Soc*. 2017;6(1):9-19.
- 501 17. Ojeda J, Arredondo JL, Salcedo P, et al. Immunogenicity and safety of a multi-dose  
502 quadrivalent inactivated influenza vaccine in individuals aged 6 months to 17 years: a  
503 randomized phase III trial. *Hum Vaccin Immunother*. 2019:1-5.

- 1  
2  
3 504 18. Robertson CA, Mercer M, Selmani A, et al. Safety and Immunogenicity of a Full-dose,  
4 505 Split-virion, Inactivated, Quadrivalent Influenza Vaccine in Healthy Children 6-35 Months of  
5 506 Age: A Randomized Controlled Clinical Trial. *Pediatr Infect Dis J*. 2019;38(3):323-8.
- 6 507 19. A Phase IIIB, observer-blind, randomized, parallel groups, extension study to evaluate  
7 508 the immunogenicity and safety following a single intramuscular dose of FLUAD or Agrippal S1  
8 509 influenza vaccines in healthy children previously vaccinated in the V70P5 study. [Internet]. 2015  
9 510 [cited July 14, 2020]. Available from: [https://www.clinicaltrialsregister.eu/ctr-search/trial/2010-](https://www.clinicaltrialsregister.eu/ctr-search/trial/2010-021644-18/results)  
10 511 [021644-18/results](https://www.clinicaltrialsregister.eu/ctr-search/trial/2010-021644-18/results).
- 11 512 20. Kramer JS, Durham C, Schroeder T, et al. Effectiveness of half-dose versus full-dose  
12 513 influenza vaccine in health care workers. *Am J Health Syst Pharm*. 2006;63(21):2111-5.
- 13 514 21. Engler RJ, Nelson MR, Klote MM, et al. Half-vs full-dose trivalent inactivated influenza  
14 515 vaccine (2004-2005): age, dose, and sex effects on immune responses. *Arch Intern Med*.  
15 516 2008;168(22):2405-14.
- 16 517 22. Belshe RB, Newman FK, Wilkins K, et al. Comparative immunogenicity of trivalent  
17 518 influenza vaccine administered by intradermal or intramuscular route in healthy adults. *Vaccine*.  
18 519 2007;25(37-38):6755-63.
- 19 520 23. Chi RC, Rock MT, Neuzil KM. Immunogenicity and safety of intradermal influenza  
20 521 vaccination in healthy older adults. *Clin Infect Dis*. 2010;50(10):1331-8.
- 21 522 24. Thomas RE. Is influenza-like illness a useful concept and an appropriate test of influenza  
22 523 vaccine effectiveness? *Vaccine*. 2014;32(19):2143-9.
- 23 524 25. Peters MD, Godfrey C, McInerney P, et al. Chapter 11: scoping reviews (2020 version).  
24 525 *JBI manual for evidence synthesis, JBI*. 2020;2020.
- 25 526 26. Schnyder JL, De Pijper CA, Garcia Garrido HM, et al. Fractional dose of intradermal  
26 527 compared to intramuscular and subcutaneous vaccination - A systematic review and meta-  
27 528 analysis. *Travel Med Infect Dis*. 2020;37:101868.
- 28  
29  
30  
31  
32  
33  
34  
35  
36  
37  
38  
39  
40  
41  
42  
43  
44  
45  
46  
47  
48  
49  
50  
51  
52  
53  
54  
55  
56  
57  
58  
59  
60

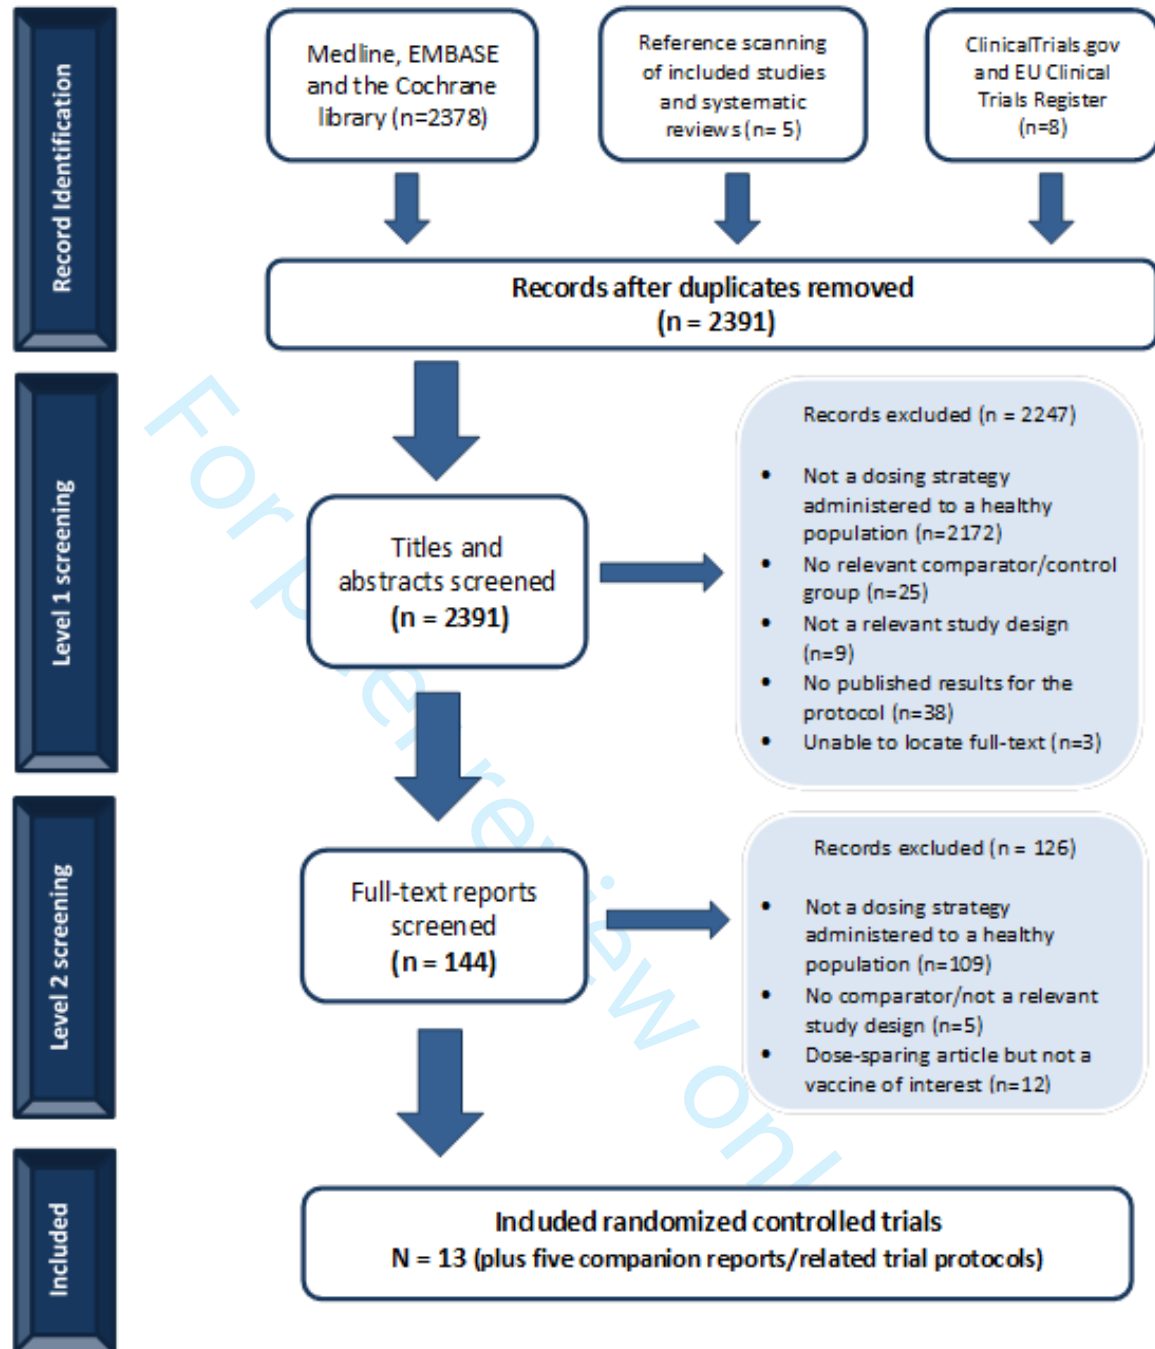

## APPENDIX 1 – MEDLINE search strategy

Database: Ovid MEDLINE(R) ALL <1946 to May 29, 2020>

### Search Strategy:

-----

- 1 influenza, human/ or exp influenza a virus/ or exp influenzavirus b/ or influenzavirus c/
- 2 (flu or flue or influenza\* or grippe).tw,kf.
- 3 1 or 2
- 4 exp Vaccines/ or Immunization/
- 5 (vaccin\* or immuni\* or inocula\* or shot or jab).tw,kf.
- 6 4 or 5
- 7 3 and 6
- 8 influenza vaccines/ or Adjuvants, Immunologic/
- 9 (LAIV or Fluenz or FluMist or Afluria or Fluad or Fluzone or Flulaval or Fluarix or Flublok or
- 10 Flucelvax or FluQuadri or Vaxigrip or Influvac or Fluvirin or Agrippal or Begrivac or Fluad or
- 11 agriflu or fluviral).tw,kf.
- 12 7 or 8 or 9
- 13 Injections, Intramuscular/
- 14 (intramuscular or intra-muscular).tw,kf.
- 15 or/11-12
- 16 10 and 13
- 17 limit 14 to yr=2000-current
- 18 animals/ not humans/
- 19 15 not 16
- 20 ad.fs.
- 21 11 or 12 or 18
- 22 10 and 19
- 23 exp dose-response relationship, immunologic/
- 24 dose-Response Relationship, Drug/
- 25 (Dos\* sparing or Dose -sparing or half-dose or dose-response or dose response or dose
- 26 effect\* or dose-effect\* or fractional dos\*).tw,kf.
- 27 ((reduc\* or lower or less) adj2 (quantity or strength or standard)).tw,kf.
- 28 ((dos\* adj3 change) or (half adj3 dos\*)).tw,kf.
- 29 ((down adj3 titrat\*) or (dose adj3 titrat\*) or (dose adj3 reduc\*) or (dose adj3 "de-escalat\*")
- 30 or (dose adj3 taper\*)).tw,kf.
- 31 or/21-26
- 32 20 and 27
- 33 animals/ not humans/
- 34 28 not 29
- 35 limit 30 to yr=2000-current
- 36 17 or 31

## APPENDIX 2 – EMBASE search strategy

Database: Ovid MEDLINE(R) Embase <2000 to June 11, 2020>

### Search Strategy:

-----

1 influenza, human/ or exp influenza a virus/ or exp influenzavirus b/ or influenzavirus c/  
 2 (flu or flue or influenza\* or grippe).tw,kf.  
 3 1 or 2  
 4 exp Vaccines/ or Immunization/  
 5 (vaccin\* or immuni\* or inocula\* or shot or jab).tw,kf.  
 6 4 or 5  
 7 3 and 6  
 8 influenza vaccines/ or Adjuvants, Immunologic/  
 9 (LAIV or Fluenz or FluMist or Afluria or Fluad or Fluzone or Flulaval or Fluarix or Flublok  
 10 or Flucelvax or FluQuadri or Vaxigrip or Influvac or Fluvirin or Agrippal or Begrivac or Fluad or  
 11 agriflu or fluviral).tw,kf.  
 12 7 or 8 or 9  
 13 Injections, Intramuscular/  
 14 (intramuscular or intra-muscular).tw,kf.  
 15 or/11-12  
 16 10 and 13  
 17 limit 14 to yr=2009-current  
 18 animals/ not humans/  
 19 15 not 16  
 20 ad.fs.  
 21 11 or 12 or 18  
 22 10 and 19  
 23 exp dose-response relationship, immunologic/  
 24 dose-Response Relationship, Drug/  
 25 (Dos\* sparing or Dose -sparing or half-dose or dose-response or dose response or dose  
 26 effect\* or dose-effect\* or fractional dos\*).tw,kf.  
 27 ((reduc\* or lower or less) adj2 (quantity or strength or standard)).tw,kf.  
 28 ((dos\* adj3 change) or (half adj3 dos\*)).tw,kf.  
 29 ((down adj3 titrat\*) or (dose adj3 titrat\*) or (dose adj3 reduc\*) or (dose adj3 "de-  
 30 escalat\*") or (dose adj3 taper\*)).tw,kf.  
 31 or/21-26  
 32 20 and 27  
 33 animals/ not humans/  
 34 28 not 29  
 35 limit 30 to yr=2009-current  
 36 17 or 31  
 37 32 use ppez  
 38 exp Influenza virus/ or exp influenza/  
 39 (flu or flue or influenza\* or grippe).tw.  
 40 34 or 35  
 41 exp vaccine/  
 42 exp immunization/  
 43 influenza vaccination/ or vaccination/  
 44 (vaccin\* or immuni\* or inocula\* or shot or jab).tw.  
 45 or/37-40  
 46 36 and 41  
 47 influenza vaccination/

1  
2  
3 44 immunological adjuvant/  
4 45 (LAIV or Fluenz or FluMist or Afluria or Fluad or Fluzone or Flulaval or Fluarix or Flublok  
5 or Flucelvax or FluQuadri or Vaxigrip or Influvac or Fluvirin or Agrippal or Begrivac or Fluad or  
6 agriflu or fluviral).tw.  
7 46 or/42-45  
8 47 intramuscular drug administration/  
9 48 (intramuscular or intra-muscular).tw.  
10 49 47 or 48  
11 50 46 and 49  
12 51 limit 50 to yr="2009 -Current"  
13 52 animals/ not humans/  
14 53 51 not 52  
15 54 ad.fs.  
16 55 49 or 54  
17 56 46 and 55  
18 57 dose response/ or drug response/  
19 58 (Dos\* sparing or Dose -sparing or half-dose or dose-response or dose response or dose  
20 effect\* or dose-effect\* or fractional dos\*).tw.  
21 59 ((reduc\* or lower or less) adj2 (quantity or strength or standard)).tw.  
22 60 ((dos\* adj3 change) or (half adj3 dos\*)).tw.  
23 61 ((down adj3 titrat\*) or (dose adj3 titrat\*) or (dose adj3 reduc\*) or (dose adj3 "de-  
24 escalat\*") or (dose adj3 taper\*)).tw.  
25 62 or/57-61  
26 63 56 and 62  
27 64 animals/ not humans/  
28 65 63 not 64  
29 66 limit 65 to yr="2009 -Current"  
30 67 53 or 66  
31 68 67 use emczd  
32 69 33 or 68  
33 70 remove duplicates from 69  
34  
35  
36  
37  
38  
39  
40  
41  
42  
43  
44  
45  
46  
47  
48  
49  
50  
51  
52  
53  
54  
55  
56  
57  
58  
59  
60



### APPENDIX 3 – Cochrane search strategy

Database: Database: EBM Reviews - Cochrane Database of Systematic Reviews <2005 to June 03, 2020>, EBM Reviews - ACP Journal Club <1991 to May 2020>, EBM Reviews - Database of Abstracts of Reviews of Effects <1st Quarter 2016>, EBM Reviews - Cochrane Clinical Answers <May 2020>, EBM Reviews - Cochrane Central Register of Controlled Trials <May 2020>, EBM Reviews - Cochrane Methodology Register <3rd Quarter 2012>, EBM Reviews - Health Technology Assessment <4th Quarter 2016>, EBM Reviews - NHS Economic Evaluation Database <1st Quarter 2016>  
**Search Strategy:**

1 (influenza, human or influenza a virus or influenzavirus b or influenzavirus c).kw.  
 2 (flu or flue or influenza\* or grippe).ti,ab.  
 3 1 or 2  
 4 (Vaccines or Immunization).kw.  
 5 (vaccin\* or immuni\* or inocula\* or shot or jab).ti,ab.  
 6 4 or 5  
 7 3 and 6  
 8 (influenza vaccines or Adjuvants, Immunologic).kw.  
 9 (LAIV or Fluenz or FluMist or Afluria or Fluad or Fluzone or Flulaval or Fluarix or Flublok or Flucelvax or FluQuadri or Vaxigrip or Influvac or Fluvirin or Agrippal or Begrivac or Fluad or agriflu or fluviral).ti,ab.  
 10 7 or 8 or 9  
 11 Injections, Intramuscular.kw.  
 12 (intramuscular or intra-muscular).ti,ab.  
 13 11 or 12  
 14 10 and 13  
 15 dose-response relationship, immunologic.kw.  
 16 dose-Response Relationship, Drug.kw.  
 17 (Dos\* sparing or Dose -sparing or half-dose or dose-response or dose response or dose effect\* or dose-effect\* or fractional dos\*).ti,ab.  
 18 ((reduc\* or lower or less) adj2 (quantity or strength or standard)).ti,ab.  
 19 ((dos\* adj3 change) or (half adj3 dos\*)).ti,ab.  
 20 ((down adj3 titrat\*) or (dose adj3 titrat\*) or (dose adj3 reduc\*) or (dose adj3 "de-escalat\*") or (dose adj3 taper\*)).ti,ab.  
 21 or/15-20  
 22 10 and 21  
 23 14 or 22  
 24 limit 23 to yr="2009 -Current" [Limit not valid in DARE; records were retained]

Database: EBM Reviews - Cochrane Database of Systematic Reviews <2005 to June 03, 2020>, EBM Reviews - ACP Journal Club <1991 to May 2020>, EBM Reviews - Database of Abstracts of Reviews of Effects <1st Quarter 2016>, EBM Reviews - Cochrane Clinical Answers <May 2020>, EBM Reviews - Cochrane Central Register of Controlled Trials <May 2020>, EBM Reviews -

**Cochrane Methodology Register <3rd Quarter 2012>, EBM Reviews - Health Technology Assessment <4th Quarter 2016>, EBM Reviews - NHS Economic Evaluation Database <1st Quarter 2016>**  
**Search Strategy:**

---

- 1 (influenza, human or influenza a virus or influenzavirus b or influenzavirus c).kw.
- 2 (flu or flue or influenza\* or grippe).ti,ab.
- 3 1 or 2
- 4 (Vaccines or Immunization).kw.
- 5 (vaccin\* or immuni\* or inocula\* or shot or jab).ti,ab.
- 6 4 or 5
- 7 3 and 6
- 8 (influenza vaccines or Adjuvants, Immunologic).kw.
- 9 (LAIV or Fluenz or FluMist or Afluria or Fluad or Fluzone or Flulaval or Fluarix or Flublok or Flucelvax or FluQuadri or Vaxigrip or Influvac or Fluvirin or Agrippal or Begrivac or Fluad or agriflu or fluviral).ti,ab.
- 10 7 or 8 or 9
- 11 Injections, Intramuscular.kw.
- 12 (intramuscular or intra-muscular).ti,ab.
- 13 11 or 12
- 14 10 and 13
- 15 dose-response relationship, immunologic.kw.
- 16 dose-Response Relationship, Drug.kw.
- 17 (Dos\* sparing or Dose -sparing or half-dose or dose-response or dose response or dose effect\* or dose-effect\* or fractional dos\*).ti,ab.
- 18 ((reduc\* or lower or less) adj2 (quantity or strength or standard)).ti,ab.
- 19 ((dos\* adj3 change) or (half adj3 dos\*)).ti,ab.
- 20 ((down adj3 titrat\*) or (dose adj3 titrat\*) or (dose adj3 reduc\*) or (dose adj3 "de-escalat\*") or (dose adj3 taper\*)).ti,ab.
- 21 or/15-20
- 22 10 and 21
- 23 14 or 22
- 24 limit 23 to yr="2000 - 2008" [Limit not valid in DARE; records were retained]
- 25 from 24 keep 1-173

## APPENDIX 4 – List of eligible vaccines

| Product name (manufacturer)                         | Vaccine Characteristic |                                   |                                                     |                                                                    |                                                                                                    |
|-----------------------------------------------------|------------------------|-----------------------------------|-----------------------------------------------------|--------------------------------------------------------------------|----------------------------------------------------------------------------------------------------|
|                                                     | Vaccine type           | Route of administration           | Authorized ages for use                             | Antigen content for each vaccine strain                            | Formats available                                                                                  |
| Flulaval Tetra (GSK)                                | IIV4-SD (split virus)  | IM                                | 6 months and older                                  | 15 µg HA /0.5 mL dose                                              | 5 mL multi-dose vial<br>Single dose pre-filled syringe                                             |
| Fluzone Quadrivalent (Sanofi Pasteur)               | IIV4-SD (split virus)  | IM                                | 6 months and older                                  | 15 µg HA /0.5 mL dose                                              | 5 mL multi-dose vial<br>Single dose vial<br>Single dose pre-filled syringe without attached needle |
| Afluria Tetra (Seqirus)                             | IIV4-SD (split virus)  | IM                                | 5 years and older                                   | 15 µg HA /0.5 mL dose                                              | Up to expiry date indicate on vial label                                                           |
| Influvac Tetra (BGP Pharma ULC, operating as Mylan) | IIV4-SD (subunit)      | IM or deep subcutaneous injection | 3 years and older                                   | 15 µg HA /0.5 mL dose                                              | Single dose pre-filled syringe with or without a needle                                            |
| Vaxigrip Tetra                                      | IIV4                   | IM                                | 6 months and older                                  | Pediatric: 7.5 µg HA /0.25 mL dose<br>Adult: 15 µg HA /0.5 mL dose | 0.5 mL pre-filled syringe                                                                          |
| Fluarix Tetra/ Influxplit Tetra (GSK)               | IIV4                   | IM                                | 6 months and older                                  | 15 µg HA /0.5 mL dose                                              | 0.5 mL pre-filled syringe                                                                          |
| Agriflu (Seqirus)                                   | IIV3-SD (subunit)      | IM                                | 6 months and older                                  | 15 µg HA /0.5 mL dose                                              | 5 mL multi-dose vial<br>Single dose pre-filled syringe without attached needle                     |
| Fluad Pediatric and Fluad (Seqirus)                 | IIV3-Adj (subunit)     | IM                                | Pediatric: 6-23 months<br>Adult: 65 years and older | Pediatric: 7.5 µg HA /0.25 mL dose<br>Adult: 15 µg HA /0.5 mL dose | Single dose pre-filled syringe without a needle                                                    |
| Fluviral (GSK)                                      | IIV3-SD (split virus)  | IM                                | 6 months and older                                  | 15 µg HA /0.5 mL dose                                              | 5 mL multi-dose vial                                                                               |
| Fluzone TIV (Sanofi Pasteur)                        | IIV3-HD (split virus)  | IM                                | 65 years and older                                  | Adult: 15 µg HA /0.5 mL dose                                       | 0.5 mL pre-filled syringe                                                                          |
| Vaxigrip TIV                                        | IIV3-SD                | IM                                | 6 months and older                                  | Pediatric: 7.5 µg HA /0.25 mL dose<br>Adult: 15 µg HA /0.5 mL dose | 0.5 mL pre-filled syringe                                                                          |

**Note:** list of vaccines included in the review is based on feedback from PHAC and the 2020-2021 seasonal vaccine availability in Canada found here: <https://www.canada.ca/en/public-health/services/publications/vaccines-immunization/canadian-immunization-guide-statement-seasonal-influenza-vaccine-2020-2021.html#appA>

## APPENDIX 5 – Excluded dose-sparing studies

|    | Reference                                                                                                                                                                                                                                                                                                                                                                                                                                                                                                                           | Reason for exclusion                                                     |
|----|-------------------------------------------------------------------------------------------------------------------------------------------------------------------------------------------------------------------------------------------------------------------------------------------------------------------------------------------------------------------------------------------------------------------------------------------------------------------------------------------------------------------------------------|--------------------------------------------------------------------------|
| 1  | Euctr, H. U. A Randomized, Double-blind, Multi-Center Study to Evaluate Safety and Immunogenicity of One Dose of Four FLUVAL AB-like (Trivalent, Whole Virus, Aluminium Phosphate Gel Adjuvanted) Influenza Vaccines Containing 3.5[micro]gHA, 6[micro]gHA, 9[micro]gHA or 1. 2011. Available from: <a href="http://www.who.int/trialsearch/Trial2.aspx?TrialID=EUCTR2011">http://www.who.int/trialsearch/Trial2.aspx?TrialID=EUCTR2011</a>                                                                                         | exclude - dose-sparing but vaccine not of interest                       |
| 2  | Vajo Z, Tamas F, Jankovics I. A reduced-dose seasonal trivalent influenza vaccine is safe and immunogenic in adult and elderly patients in a randomized controlled trial. <i>Clin Vaccine Immunol.</i> 2012;19(3):313-318. doi:10.1128/CVI.05619-11                                                                                                                                                                                                                                                                                 | exclude - dose-sparing but vaccine not of interest                       |
| 3  | Treanor J, Keitel W, Belshe R, et al. Evaluation of a single dose of half strength inactivated influenza vaccine in healthy adults. <i>Vaccine.</i> 2002;20(7-8):1099-1105. doi:10.1016/s0264-410x(01)00440-6                                                                                                                                                                                                                                                                                                                       | exclude - dose-sparing but vaccine not of interest                       |
| 4  | Euctr. A Randomized, Active Controlled, Double-blind, Multi-Centre Study to Evaluate Safety and Immunogenicity of One Dose of FLUVAL AB-like (Trivalent, Whole Virus, Aluminium Phosphate Gel Adjuvanted) Influenza Vaccine Containing 6µgHA of Seasonal A/H1N1, A/H3N2 and B Influenza Antigens in Non-elderly Adult and Elderly Subjects. 2011. Available from: <a href="http://www.who.int/trialsearch/Trial2.aspx?TrialID=EUCTR2011-003314-16-HU">http://www.who.int/trialsearch/Trial2.aspx?TrialID=EUCTR2011-003314-16-HU</a> | exclude - dose-sparing but experimental vaccine                          |
| 5  | Euctr, E. S. Clinical study to compare the safety of two influenza vaccines in children and adolescents of 3 to less than 18 years of age at risk for influenza-related complications. 2013. Available from: <a href="http://www.who.int/trialsearch/Trial2.aspx?TrialID=EUCTR2013">http://www.who.int/trialsearch/Trial2.aspx?TrialID=EUCTR2013</a>                                                                                                                                                                                | exclude - dose-sparing but experimental vaccine                          |
| 6  | Pillet S, Aubin É, Trépanier S, et al. A plant-derived quadrivalent virus like particle influenza vaccine induces cross-reactive antibody and T cell response in healthy adults. <i>Clin Immunol.</i> 2016;168:72-87. doi:10.1016/j.clim.2016.03.008                                                                                                                                                                                                                                                                                | exclude - dose-sparing but experimental vaccine                          |
| 7  | Lee JH, Cho HK, Kim KH, et al. Evaluation of Waning Immunity at 6 Months after Both Trivalent and Quadrivalent Influenza Vaccination in Korean Children Aged 6-35 Months. <i>J Korean Med Sci.</i> 2019;34(46):e279. Published 2019 Dec 2. doi:10.3346/jkms.2019.34.e279                                                                                                                                                                                                                                                            | exclude - dose-sparing but experimental vaccine                          |
| 8  | Treanor JJ, Taylor DN, Tussey L, et al. Safety and immunogenicity of a recombinant hemagglutinin influenza-flagellin fusion vaccine (VAX125) in healthy young adults. <i>Vaccine.</i> 2010;28(52):8268-8274. doi:10.1016/j.vaccine.2010.10.009                                                                                                                                                                                                                                                                                      | exclude - dose-sparing but experimental vaccine                          |
| 9  | Vajo Z, Balaton G, Vajo P, Kalabay L, Erdman A, Torzsa P. Dose sparing and the lack of a dose-response relationship with an influenza vaccine in adult and elderly patients - a randomized, double-blind clinical trial. <i>Br J Clin Pharmacol.</i> 2017;83(9):1912-1920. doi:10.1111/bcp.13289                                                                                                                                                                                                                                    | exclude - dose-sparing but vaccine not of interest                       |
| 10 | Ctri. Study of a Single Dose or Two Doses of a Quadrivalent Influenza Vaccine in Subjects Aged 6 Months or Older in India. 2015. Available from: <a href="http://www.who.int/trialsearch/Trial2.aspx?TrialID=CTRI">http://www.who.int/trialsearch/Trial2.aspx?TrialID=CTRI</a>                                                                                                                                                                                                                                                      | exclude - dose-sparing but unclear vaccine (waiting for author response) |
| 11 | Euctr, F. I. Safety and Immunogenicity of the Quadrivalent Influenza Vaccine Administered via the Intramuscular Route in Children Aged 3 to 8 Years. 2011. Available from: <a href="http://www.who.int/trialsearch/Trial2.aspx?TrialID=EUCTR2011">http://www.who.int/trialsearch/Trial2.aspx?TrialID=EUCTR2011</a>                                                                                                                                                                                                                  | exclude - dose-sparing but unclear vaccine (waiting for author response) |
| 12 | Euctr, C. Z. A randomized, double-blind, placebo-controlled, multi-country and multi-center, phase IV study to demonstrate the efficacy of GSK Biologicals' influenza vaccine (Fluarix[TM])                                                                                                                                                                                                                                                                                                                                         | exclude - dose-sparing but unclear vaccine (waiting for author response) |

1  
2  
3  
4  
5  
6  
7  
8  
9  
10  
11  
12  
13  
14  
15  
16  
17  
18  
19  
20  
21  
22  
23  
24  
25  
26  
27  
28  
29  
30  
31  
32  
33  
34  
35  
36  
37  
38  
39  
40  
41  
42  
43  
44  
45  
46  
47  
48  
49  
50  
51  
52  
53  
54  
55  
56  
57  
58  
59  
60

|  |                                                                                                                                                                                                                           |  |
|--|---------------------------------------------------------------------------------------------------------------------------------------------------------------------------------------------------------------------------|--|
|  | administered intramuscularly in adults. - FluarixUS-006. 2006.<br>Available from: <a href="http://www.who.int/trialsearch/Trial2.aspx?TrialID=EUCTR2006">http://www.who.int/trialsearch/Trial2.aspx?TrialID=EUCTR2006</a> |  |
|--|---------------------------------------------------------------------------------------------------------------------------------------------------------------------------------------------------------------------------|--|

For peer review only

## APPENDIX 6 – Study and patient data

| Author, Year [Study design]     | Study period; Setting and Country                                                                                                                     | Objective of study                                                                                                                   | Eligibility criteria                                                                                                                                                                                                                                                                                                                                                                                                                                                                                                                                                                                 | Sample size; % Female, % previously immunized | Ethnicities                                                                                                                                                                                                   |
|---------------------------------|-------------------------------------------------------------------------------------------------------------------------------------------------------|--------------------------------------------------------------------------------------------------------------------------------------|------------------------------------------------------------------------------------------------------------------------------------------------------------------------------------------------------------------------------------------------------------------------------------------------------------------------------------------------------------------------------------------------------------------------------------------------------------------------------------------------------------------------------------------------------------------------------------------------------|-----------------------------------------------|---------------------------------------------------------------------------------------------------------------------------------------------------------------------------------------------------------------|
| Kramer, 2006 [RCT] <sup>1</sup> | October 2004 – November 2004;<br>760-bed tertiary care community teaching hospital in the USA                                                         | To compare the effectiveness of half-dose versus full dose TIV in health care workers                                                | Age 18 years or older, hospital employee, staff member, or volunteer, and signed informed consent and authorization to use and disclose protected health information for research purposes                                                                                                                                                                                                                                                                                                                                                                                                           | 444;<br>NR,<br>NR                             | NR                                                                                                                                                                                                            |
| Belshe, 2007 [RCT] <sup>2</sup> | USA;<br>NR                                                                                                                                            | To compare the immunogenicity and safety of injection of IM and ID TIV across different dose levels (3, 6, 9, and 15µg/antigen/dose) | Healthy adults 18-49 years of age                                                                                                                                                                                                                                                                                                                                                                                                                                                                                                                                                                    | 125;<br>71.2%,<br>0%                          | American Indian/Alaskan Native (0%), Asian (2.4%), Black/African American (9.6%), Hawaiian/Pacific Islander (0%), Hispanic (0%), Multi-racial (0.8%), Non-Hispanic (97.6%), Other/unknown (0%), White (87.2%) |
| Engler, 2008 [RCT] <sup>3</sup> | November 2004 – December 2004;<br>Allergy-Immunology-Immunization Clinic, WRAMC, and Pentagon/DiLorenzo Health Clinic, Arlington, Virginia in the USA | To determine the effects of age, sex, and dose on the immunogenicity of intramuscular TIV                                            | Healthy adults aged 18-64 years. Inclusion criteria were based on the remaining CDC and/or DoD priority prior to the shortage announcement which includes all children aged 6--23 months; adults aged >65 years; persons aged 2--64 years with underlying chronic medical conditions; all women who will be pregnant during the influenza season; residents of nursing homes and long-term--care facilities; children aged 2--18 years on chronic aspirin therapy; health-care workers involved in direct patient care; and out-of-home caregivers and household contacts of children aged <6 months | 1316;<br>43.4%,<br>0%                         | African American (9%), Asian (2%), Hispanic (2%), Other/unknown (1.4%), White (85%)                                                                                                                           |
|                                 | August 2007-2008;<br>Seattle Division of the Department of                                                                                            | To determine pre vaccination and 4- week post-vaccination changes in antibody titer, and                                             | Community-dwelling adults 65 years and older living in Puget Sound area in Washington State                                                                                                                                                                                                                                                                                                                                                                                                                                                                                                          | 129;<br>17.8%,<br>94.6%                       | African American (4.7%), Asian (1.6%), Hispanic (0.8%), Not reported                                                                                                                                          |

| Author, Year [Study design]         | Study period; Setting and Country                                                                           | Objective of study                                                                                                                                                                                                                            | Eligibility criteria                                                                                                                                                                                                                                                                             | Sample size; % Female, % previously immunized | Ethnicities                                                                                                                                                                                                                       |
|-------------------------------------|-------------------------------------------------------------------------------------------------------------|-----------------------------------------------------------------------------------------------------------------------------------------------------------------------------------------------------------------------------------------------|--------------------------------------------------------------------------------------------------------------------------------------------------------------------------------------------------------------------------------------------------------------------------------------------------|-----------------------------------------------|-----------------------------------------------------------------------------------------------------------------------------------------------------------------------------------------------------------------------------------|
| Chi, 2010 [RCT] <sup>4</sup>        | Veterans Affairs Puget Sound Health Care System in Washington State, USA.                                   | local and systemic reactions of full-dose compared to 60% dose of TIV by IM injection                                                                                                                                                         |                                                                                                                                                                                                                                                                                                  |                                               | (2.3%), Other (0.8%), White (90%)                                                                                                                                                                                                 |
| Cioppa, 2011 [RCT] <sup>5</sup>     | October 2008 – March 2009; 10 study centers in Finland and 5 centers in Belgium                             | To evaluate the safety, tolerability and immunogenicity of different vaccine formulations with different doses of MF59 adjuvant and/or a second B strain (QIV) when added to either high or low doses of a purified subunit influenza vaccine | Healthy children aged 6 to <36 months                                                                                                                                                                                                                                                            | 126; 43.5%, NR                                | Asian (1.68%), Black (6.54%), White (84.2%)                                                                                                                                                                                       |
| Skowronski, 2011 [RCT] <sup>6</sup> | September 2008 – December 2008; 5 sites in 3 Canadian provinces (British Columbia, Quebec, and Nova Scotia) | To determine whether giving 2 full doses of split TIV to previously unimmunized infants and toddlers can improve immunogenicity without increasing reactogenicity compared with 2 half-doses                                                  | Healthy children 6–23 months of age                                                                                                                                                                                                                                                              | 267; 53.2%, 0%                                | Asian (7.9%), Other (14.3%), White (77.8%)                                                                                                                                                                                        |
| Langley, 2012 [RCT] <sup>7</sup>    | November 2008 – August 2009; 17 centers in Canada                                                           | To assess the immunogenicity and safety of a preservative-free, prefilled syringe formulation of TIV provided as the full adult dose of 0.50 mL compared with the usual children's dose of 0.25 mL in young children                          | Healthy children 6–35 months at the time of vaccination                                                                                                                                                                                                                                          | 390; 47.9%, 42.6%                             | Other (13.9%), White (86.1%)                                                                                                                                                                                                      |
| Pavia-Ruz, 2015 [RCT] <sup>8</sup>  | October 2008 – March 2009; Hong Kong, Mexico, Taiwan, Thailand, and the USA                                 | To evaluate Fluarix at both the standard recommended TIV dose for young children in the US (0.25 ml) and also at double this dose (0.5 ml)                                                                                                    | Healthy children aged 6 to 35 months at the time of the first vaccination; without acute illness at the time of enrollment and who had not been vaccinated during the 2008-2009 influenza season. Administration of influenza vaccine in a previous season was not however an exclusion criteria | 3318; 51%, 30.1%                              | African heritage/African American (3.5%), American Indian or Alaskan native (0.1%), Asian-Central/South Asian heritage (0.1%), Asian-East Asian heritage (14.5%), Asian-Japanese heritage (0.1%), Asian-South East Asian heritage |

| Author, Year [Study design]     | Study period; Setting and Country                                | Objective of study                                                                                                                                                                                                                                                                                                                                                                                   | Eligibility criteria                                                                                                                                                                                                                                                                                                                                                                                                               | Sample size; % Female, % previously immunized | Ethnicities                                                                                                                                                                                     |
|---------------------------------|------------------------------------------------------------------|------------------------------------------------------------------------------------------------------------------------------------------------------------------------------------------------------------------------------------------------------------------------------------------------------------------------------------------------------------------------------------------------------|------------------------------------------------------------------------------------------------------------------------------------------------------------------------------------------------------------------------------------------------------------------------------------------------------------------------------------------------------------------------------------------------------------------------------------|-----------------------------------------------|-------------------------------------------------------------------------------------------------------------------------------------------------------------------------------------------------|
|                                 |                                                                  |                                                                                                                                                                                                                                                                                                                                                                                                      |                                                                                                                                                                                                                                                                                                                                                                                                                                    |                                               | (9.2%), Native Hawaiian or other Pacific Islander (0.2%), White - Arabic/North African heritage (0.5%), White-Caucasian/European heritage (29.9%), Hispanics and children of mixed race (42.1%) |
| Halasa, 2015 [RCT] <sup>9</sup> | 2010-2012; 6 study sites in USA                                  | To determine whether a higher dose of influenza vaccine would be safe in the 6 through 35 months age group. In addition, to determine whether immunization with 0.5 mL doses of TIV (15 µg of each HA) would improve the immunogenicity without increasing the reactogenicity of TIV when administered to children 6 through 35 months of age with and without a history of previous TIV vaccination | Healthy children 6 to 35 months of age (naïve cohort) or 12 through 35 months of age (fully primed cohort) who were available for the entire study period and whose parents or guardians provided informed consent were eligible to participate. Children who were eligible in the fully primed cohort also required a history of receiving 2 doses of 2009–2010 H1N1 influenza vaccine and 2 doses of TIV at any time in the past | 243; 52%, 13.2%                               | African (26%), Asian (1%), Multiracial (5%), other (0%); Ethnicity: Hispanic (2%), Non-Hispanic (98%), White (67%)                                                                              |
| Phung, 2016 [RCT] <sup>10</sup> | September 2010-January 2011; Finland                             | To evaluate the immunogenicity and safety following a single intramuscular dose of FLUAD or Agrippal S1 influenza vaccines in healthy children previously vaccinated                                                                                                                                                                                                                                 | Healthy children 6–35 months at the time of vaccination                                                                                                                                                                                                                                                                                                                                                                            | 197; 55.8%, 85.7%                             | NR                                                                                                                                                                                              |
| Jain, 2017 [RCT] <sup>11</sup>  | 2014-2015 influenza season; 66 study locations in USA and Mexico | To compare the safety and immunogenicity of a double-dose IIV4 manufactured by GSK Vaccines with the United States-approved standard-dose IIV4 in children 6–35 months of age                                                                                                                                                                                                                        | Healthy children aged 6-35 months regardless of influenza vaccination history, but could not have received any seasonal or pandemic influenza vaccine within 6 months before the first dose of study vaccine                                                                                                                                                                                                                       | 2424; 46.9%, 57.5%                            | African/African American (13.9%), American Indian or Alaskan Native (2.0%), Caucasian (64.3%), Other (17.9%), South East Asian (1.8%)                                                           |
| Ojeda, 2019 [RCT] <sup>12</sup> | December 2017 – January 2018; 3 study sites in Mexico            | Reported the results of an open-label, randomized phase III study designed to evaluate the immunogenicity and safety                                                                                                                                                                                                                                                                                 | Children aged 6 months to 17 years of age                                                                                                                                                                                                                                                                                                                                                                                          | 302; 46.4%, NR                                | NR                                                                                                                                                                                              |



| Author, Year [Study design]         | Study period; Setting and Country                | Objective of study                                                                                                                                          | Eligibility criteria                                                                                                                                                                                                                     | Sample size; % Female, % previously immunized | Ethnicities                                                                                                                                                                                                       |
|-------------------------------------|--------------------------------------------------|-------------------------------------------------------------------------------------------------------------------------------------------------------------|------------------------------------------------------------------------------------------------------------------------------------------------------------------------------------------------------------------------------------------|-----------------------------------------------|-------------------------------------------------------------------------------------------------------------------------------------------------------------------------------------------------------------------|
| Robertson, 2019 [RCT] <sup>13</sup> | September 2016 – March 2017; 38 sites in the USA | To compare the safety and immunogenicity of full and half doses of quadrivalent, split-virion, inactivated influenza vaccine in children 6–35 months of age | Healthy children 6–35 months of age who had not been vaccinated against influenza during the current season (2016–2017). Children 6–11 months of age had to be born at full term of pregnancy (≥37 weeks) or with a birth weight ≥2.5 kg | 1950; 49.7%, 47.3%                            | Race: American Indian or Alaska Native (0.98%), Asian (0.46%), Black (19.2%), Native Hawaiian or Other Pacific Islander (0.46%), White (74.3%), Ethnicity: Hispanic or Latino (22%), not Hispanic or Latino (77%) |

**Abbreviations:** CDC- Centers for Disease Control and Prevention; DoD- Department of Defense; GSK -GlaxoSmithKline; HA- hemagglutinin; IIV4 – inactivated influenza vaccine; ID - intradermal; IM - intramuscular; MDV- multi-dose vial; PFS – pre-filled syringe; QIV-quadrivalent influenza vaccine; TIV-trivalent influenza vaccine; NR – not reported

**APPENDIX 7 – Treatment and outcome data**

| <b>Author,<br/>Year;<br/>[Study<br/>design]<br/>Population</b>                    | <b>Treatment arms</b><br>Brand name (manufacturer),<br>HA/strain [dosing (administration)]<br>Included strains                                                                                                                                                                                                                                                                                                                          | <b>Effectiveness and Safety</b><br>Outcome (definition):<br>n/N (unless otherwise indicated)                                                                                                                                                                                                                                                                                                                                                                                                                                                                                                                                                                                                                                                                                                                                                                                | <b>Conclusions</b>                                                                                                                                                                                                                                                                                                                                                                                             |
|-----------------------------------------------------------------------------------|-----------------------------------------------------------------------------------------------------------------------------------------------------------------------------------------------------------------------------------------------------------------------------------------------------------------------------------------------------------------------------------------------------------------------------------------|-----------------------------------------------------------------------------------------------------------------------------------------------------------------------------------------------------------------------------------------------------------------------------------------------------------------------------------------------------------------------------------------------------------------------------------------------------------------------------------------------------------------------------------------------------------------------------------------------------------------------------------------------------------------------------------------------------------------------------------------------------------------------------------------------------------------------------------------------------------------------------|----------------------------------------------------------------------------------------------------------------------------------------------------------------------------------------------------------------------------------------------------------------------------------------------------------------------------------------------------------------------------------------------------------------|
| Kramer,<br>2006<br>[RCT] <sup>1</sup><br><br>Adults and<br>Seniors<br>(>18 years) | Fluzone (Aventis Pasteur),<br><b>15-µg/strain</b> [1 x 0.5mL dose (Intramuscular into the deltoid region)]<br><br>A/Wyoming/3/2003 (H3N2), A/New Caledonia/20/99 (H1N1), and a new B strain, B/Jiangsu/10/2003<br><br>Fluzone (Aventis Pasteur),<br><b>7.5-µg/strain</b> [1 x 0.25 mL dose (Intramuscular into the deltoid region)]<br><br>A/Wyoming/3/2003 (H3N2), A/New Caledonia/20/99 (H1N1), and a new B strain, B/Jiangsu/10/2004 | <b>Effectiveness</b><br>Lab confirmed influenza (Laboratory confirmation of influenza diagnosis was sought in participants reporting a clinical diagnosis by their physicians): 1/222<br><br>Influenza like illness (Clinical diagnosis of influenza. Participants self-reported four or more symptoms consistent with influenza-like illness (i.e., headache, extreme tiredness, dry cough, fever, muscle or body aches)): 8/222<br><br><b>Effectiveness</b><br>Lab confirmed influenza (Laboratory confirmation of influenza diagnosis was sought in participants reporting a clinical diagnosis by their physicians): 0/222<br><br>Influenza like illness (Clinical diagnosis of influenza. Participants self-reported four or more symptoms consistent with influenza-like illness (i.e., headache, extreme tiredness, dry cough, fever, muscle or body aches)): 15/222 | <ul style="list-style-type: none"> <li>There was no significant difference between the full-dose and half-dose groups in the diagnosis of influenza or in the proportion of participants self-reporting four or more symptoms consistent with influenza-like illness.</li> <li>No adverse events were noted by participants from either group or reported to the IRB during the course of the study</li> </ul> |
| Belshe, 2007<br>[RCT] <sup>2</sup><br><br>Adults<br>(18-49 years)                 | Fluzone (Sanofi-Pasteur),<br><b>15-µg/strain</b> [1 x 0.5mL dose (Intramuscular in the non-dominant arm)]<br><br>Fluzone (Sanofi-Pasteur),<br><b>9-µg/strain</b> [1 x 0.3mL dose (Intramuscular in the non-dominant arm)]                                                                                                                                                                                                               | <b>Reactogenicity – injection site</b><br>Pain <sup>1</sup> : 15/31<br>Redness <sup>2</sup> : 8/31<br>Swelling <sup>2</sup> : 7/31<br><br><b>Reactogenicity – systemic</b><br>Fever <sup>3</sup> : 1/31<br>Headache <sup>1</sup> : 15/31<br>Malaise <sup>1</sup> : 8/31<br>Myalgia <sup>1</sup> : 10/31<br><br><b>Reactogenicity – injection site</b><br>Pain <sup>1</sup> : 11/31<br>Redness <sup>2</sup> : 11/31<br>Swelling <sup>2</sup> : 4/31<br><br><b>Reactogenicity – systemic</b><br>Fever <sup>3</sup> : 1/31<br>Headache <sup>1</sup> : 6/31                                                                                                                                                                                                                                                                                                                     | <ul style="list-style-type: none"> <li>Intradermal vaccine induced significantly more local inflammatory response than Intramuscular vaccine (primary comparison of this study was ID vs IM doses)</li> </ul>                                                                                                                                                                                                  |

| Author,<br>Year;<br>[Study<br>design]<br>Population                              | Treatment arms<br>Brand name (manufacturer),<br>HA/strain [dosing (administration)]<br>Included strains                                                                                             | Effectiveness and Safety<br>Outcome (definition):<br>n/N (unless otherwise indicated)                                                                                                                                                                                                                                                                                                                                                                                                                                                                                                                                      | Conclusions                                                                                                                                                                                                                                                                                                                                                                                                                                                                                               |
|----------------------------------------------------------------------------------|-----------------------------------------------------------------------------------------------------------------------------------------------------------------------------------------------------|----------------------------------------------------------------------------------------------------------------------------------------------------------------------------------------------------------------------------------------------------------------------------------------------------------------------------------------------------------------------------------------------------------------------------------------------------------------------------------------------------------------------------------------------------------------------------------------------------------------------------|-----------------------------------------------------------------------------------------------------------------------------------------------------------------------------------------------------------------------------------------------------------------------------------------------------------------------------------------------------------------------------------------------------------------------------------------------------------------------------------------------------------|
|                                                                                  | <p>Fluzone (Sanofi-Pasteur),<br/><b>6-µg/strain</b> [1 x 0.2mL dose (Intramuscular in the non-dominant arm)]</p>                                                                                    | <p><i>Malaise</i><sup>1</sup>: 8/31<br/><i>Myalgia</i><sup>1</sup>: 6/31</p> <p><b>Reactogenicity – injection site</b><br/><i>Pain</i><sup>1</sup>: 14/31<br/><i>Redness</i><sup>2</sup>: 9/31<br/><i>Swelling</i><sup>2</sup>: 4/31</p> <p><b>Reactogenicity – systemic</b><br/><i>Fever</i><sup>3</sup>: 0/31<br/><i>Headache</i><sup>1</sup>: 9/31<br/><i>Malaise</i><sup>1</sup>: 7/31<br/><i>Myalgia</i><sup>1</sup>: 9/31</p>                                                                                                                                                                                        |                                                                                                                                                                                                                                                                                                                                                                                                                                                                                                           |
|                                                                                  | <p>Fluzone (Sanofi-Pasteur),<br/><b>3-µg/strain</b> [1 x 0.1mL dose (Intramuscular in the non-dominant arm)]</p>                                                                                    | <p><b>Reactogenicity – injection site</b><br/><i>Pain</i><sup>1</sup>: 15/31<br/><i>Redness</i><sup>2</sup>: 9/31<br/><i>Swelling</i><sup>2</sup>: 7/31</p> <p><b>Reactogenicity – systemic</b><br/><i>Fever</i><sup>3</sup>: 3/31<br/><i>Headache</i><sup>1</sup>: 8/31<br/><i>Malaise</i><sup>1</sup>: 3/31<br/><i>Myalgia</i><sup>1</sup>: 7/31</p>                                                                                                                                                                                                                                                                     |                                                                                                                                                                                                                                                                                                                                                                                                                                                                                                           |
| <p>Engler, 2008<br/>[RCT]<sup>3</sup></p> <p><i>Adults</i><br/>(18-64 years)</p> | <p>Fluzone (Aventis Pasteur),<br/><b>15-µg/strain</b> [1 x 0.5mL dose (Intramuscular injection)]</p> <p><i>A/H1N1, A/New Caledonia/20/99; A/H3N2, A/Fujian/411/2002; B, B/Shanghai/361/2002</i></p> | <p><b>Effectiveness</b><br/><i>Influenza like illness</i> (Influenza-like illness and complications resulting in either inpatient or outpatient medical encounters were compared between dose groups (by age)): 61/632</p> <p><i>Hospitalization or Emergency visits</i>: 0.3%</p> <p><b>Reactogenicity – local/injection site</b><br/><i>Any local reactions</i> (NR): 8.9%<br/><i>Arm weakness</i> (NR): 8.3%<br/><i>Numbness or burning</i> (NR): 9.7%<br/><i>Pain</i> (NR): 5.9%<br/><i>Redness or swelling</i> (NR): 13.4%</p> <p><b>Reactogenicity – systemic</b><br/><i>Joint and/or muscle pain</i> (NR): 4.5%</p> | <ul style="list-style-type: none"> <li>▪ The relative risk of medical visits and hospitalizations for influenza-like illnesses were similar in the half- and full-dose group regardless of age, and there was no evidence of ILI symptom differences by sex or dose during the 21 days after immunizations.</li> <li>▪ Although injection site pain was greater for full vs half dose (19.9% vs 14.4%; p=.01), when analyzed for clinically significant pain levels significant dose-dependent</li> </ul> |

| Author, Year; [Study design] Population                          | Treatment arms<br>Brand name (manufacturer), HA/strain [dosing (administration)]<br>Included strains                                                                                                                 | Effectiveness and Safety<br>Outcome (definition):<br>n/N (unless otherwise indicated)                                                                                                                                                                                                                                                                                                                                                                                                                                                                                                                                                                                                                                                                                           | Conclusions                                                                                                                                                                                                                                                  |
|------------------------------------------------------------------|----------------------------------------------------------------------------------------------------------------------------------------------------------------------------------------------------------------------|---------------------------------------------------------------------------------------------------------------------------------------------------------------------------------------------------------------------------------------------------------------------------------------------------------------------------------------------------------------------------------------------------------------------------------------------------------------------------------------------------------------------------------------------------------------------------------------------------------------------------------------------------------------------------------------------------------------------------------------------------------------------------------|--------------------------------------------------------------------------------------------------------------------------------------------------------------------------------------------------------------------------------------------------------------|
|                                                                  | <p>Fluzone (Aventis Pasteur),<br/><b>7.5-µg/strain</b> [1 x 0.25 mL dose (Intramuscular injection)]</p> <p><i>A/H1N1, A/New Caledonia/20/99; A/H3N2, A/Fujian/411/2002; B, B/Shanghai/361/2003</i></p>               | <p><b>Adverse events</b><br/>SAE: 2/554</p> <p><b>Effectiveness</b><br/><i>Influenza like illness</i> (Influenza-like illness and complications resulting in either inpatient or outpatient medical encounters were compared between dose groups (by age): 64/644</p> <p><i>Hospitalization or Emergency visits</i>: 0.2%</p> <p><b>Reactogenicity – local/injection site</b><br/><i>Any local reactions</i> (NR): 7.5%<br/><i>Arm weakness</i> (NR): 6.5%<br/><i>Numbness or burning</i> (NR): 7.8%<br/><i>Pain</i> (NR): 4.6%<br/><i>Redness or swelling</i> (NR): 8.6%</p> <p><b>Reactogenicity – systemic</b><br/><i>Joint and/or muscle pain</i> (NR): 2.2%</p> <p><b>Adverse events</b><br/>SAE: 1/556</p>                                                                | <p>pain differences were not identified.</p> <ul style="list-style-type: none"> <li>Joint and/or muscle pain were significantly different (p=.02 and p=.03, respectively) by dose.</li> <li>No other adverse event differed significantly by dose</li> </ul> |
| <p>Chi, 2010 [RCT]<sup>4</sup></p> <p>Seniors (&gt;65 years)</p> | <p>Fluzone (Sanofi Pasteur),<br/><b>15-µg/strain</b> [1 x 0.5mL dose (intramuscular in deltoid of arm)]</p> <p><i>A/Solomon Islands/3/ 2006 (A/H1N1), A/Wisconsin/67/2005 (A/H3N2), and B/Malaysia/2506/2004</i></p> | <p><b>Reactogenicity – injection site, N=64</b><br/><i>Arm motion limitation</i>: 1 (grade I)<sup>4</sup><br/><i>Itching</i>: 4 (grade I)<sup>4</sup><br/><i>Pain</i>: 7 (grade I)<sup>4</sup><br/><i>Redness or discoloration</i>: 9 (grade I)<sup>4</sup><br/><i>Swelling</i>: 13 (grade I)<sup>4</sup></p> <p><b>Reactogenicity - systemic, N=64</b><br/><i>Chills</i>: 1 (grade I)<sup>4</sup>, 1 (grade II/III)<sup>5</sup><br/><i>Fatigue</i>: 4 (grade I)<sup>4</sup>, 2 (grade II/III)<sup>5</sup><br/><i>Fever</i>: 0<br/><i>General body ache/pain</i>: 6 (grade I)<sup>4</sup>, 1 (grade II/III)<sup>5</sup><br/><i>Headache</i>: 10 (grade I)<sup>4</sup><br/><i>Nausea</i>: 3 (grade I)<sup>4</sup>, 1 (grade II/III)<sup>5</sup></p> <p><b>Adverse events</b></p> | <ul style="list-style-type: none"> <li>The two SAEs were acute coronary syndrome and appendicitis and neither were judged to be related to influenza vaccination</li> </ul>                                                                                  |

| Author,<br>Year;<br>[Study<br>design]<br>Population                                                     | Treatment arms<br>Brand name (manufacturer),<br>HA/strain [dosing (administration)]<br>Included strains                                                                                                                                                                                                                                                                                                                                                                                                                                                                                                                                                                                                                                                                                                           | Effectiveness and Safety<br><i>Outcome</i> (definition):<br>n/N (unless otherwise indicated)                                                                                                                                                                                                                                                                                                                                                                                                                                                                                                                                                                                                                                                                                                                                                                                              | Conclusions                                                                                                                                                                                                                                                                                                              |
|---------------------------------------------------------------------------------------------------------|-------------------------------------------------------------------------------------------------------------------------------------------------------------------------------------------------------------------------------------------------------------------------------------------------------------------------------------------------------------------------------------------------------------------------------------------------------------------------------------------------------------------------------------------------------------------------------------------------------------------------------------------------------------------------------------------------------------------------------------------------------------------------------------------------------------------|-------------------------------------------------------------------------------------------------------------------------------------------------------------------------------------------------------------------------------------------------------------------------------------------------------------------------------------------------------------------------------------------------------------------------------------------------------------------------------------------------------------------------------------------------------------------------------------------------------------------------------------------------------------------------------------------------------------------------------------------------------------------------------------------------------------------------------------------------------------------------------------------|--------------------------------------------------------------------------------------------------------------------------------------------------------------------------------------------------------------------------------------------------------------------------------------------------------------------------|
|                                                                                                         | <p>Fluzone (Sanofi Pasteur),<br/><b>9-µg/strain</b> [1 x 0.3mL dose (intramuscular in deltoid of arm)]</p> <p><i>A/Solomon Islands/3/2006 (A/H1N1),<br/>A/Wisconsin/67/2005 (A/H3N2), and<br/>B/Malaysia/2506/2004</i></p>                                                                                                                                                                                                                                                                                                                                                                                                                                                                                                                                                                                        | <p>SAE<sup>6</sup>: 0/64</p> <p><b>Reactogenicity – injection site, N=64</b><br/><i>Arm motion limitation</i>: 1 (grade I)<sup>4</sup><br/><i>Itching</i>: 5 (grade I)<sup>4</sup><br/><i>Pain</i>: 11 (grade I)<sup>4</sup><br/><i>Redness or discoloration</i>: 7 (grade I)<sup>4</sup><br/><i>Swelling</i>: 4 (grade I)<sup>4</sup></p> <p><b>Reactogenicity - systemic, N=64</b><br/><i>Chills</i>: 1 (grade I)<sup>4</sup>, 1 (grade II/III)<sup>5</sup><br/><i>Fatigue</i>: 6 (grade I)<sup>4</sup>, 1 (grade II/III)<sup>5</sup><br/><i>Fever</i>: 1 (grade I)<sup>4</sup><br/><i>General body ache/pain</i>: 5 (grade I)<sup>4</sup>, 2 (grade II/III)<sup>5</sup><br/><i>Headache</i>: 5 (grade I)<sup>4</sup>, 1 (grade II/III)<sup>5</sup><br/><i>Nausea</i>: 2 (grade I)<sup>4</sup>, 1 (grade II/III)<sup>5</sup></p> <p><b>Adverse events</b><br/>SAE<sup>6</sup>: 2/64</p> |                                                                                                                                                                                                                                                                                                                          |
| <p>Cioppa,<br/>2011<br/>[RCT]<sup>5</sup></p> <p><i>Infants/<br/>Toddlers<br/>(6-36<br/>months)</i></p> | <p>NR - TIV,<br/><b>7.5-µg/strain</b> [2 x 0.25mL dose (intramuscular in deltoid of arm (children 24-35 mo of age) or the anterolateral aspect of the thigh (children &lt;24 mo of age) using prefilled syringes)]</p> <p><i>A/Brisbane/59/2007 (A/H1N1)-like virus,<br/>A/Brisbane/10/2007 (A/H3N2)-like virus, and<br/>B/Florida/4/2006-like virus (of the influenza<br/>B/Yamagata lineage)</i></p> <p>Agrippal - TIV,<br/><b>15-µg/strain</b> [2 x 0.5mL dose (intramuscular in deltoid of arm (children 24-35 mo of age) or the anterolateral aspect of the thigh (children &lt;24 mo of age) using prefilled syringes)]</p> <p><i>A/Brisbane/59/2007 (A/H1N1)-like virus,<br/>A/Brisbane/10/2007 (A/H3N2)-like virus, and<br/>B/Florida/4/2006-like virus (of the influenza<br/>B/Yamagata lineage)</i></p> | <p><b>Reactogenicity</b><br/><i>Any local reaction</i><sup>7</sup>: 47%<br/><i>Any systemic reaction</i><sup>8</sup>: 68%</p> <p><b>Adverse events</b><br/>AE (solicited/spontaneously reported): 84%<br/>SAE: 0/25</p> <p><b>Reactogenicity</b><br/><i>Any local reaction</i><sup>7</sup>: 59%<br/><i>Any systemic reaction</i><sup>8</sup>: 50%</p> <p><b>Adverse events</b><br/>AE (solicited/spontaneously reported): 82%<br/>SAE: 0/22</p>                                                                                                                                                                                                                                                                                                                                                                                                                                           | <ul style="list-style-type: none"> <li>Reactogenicity of the 7.5-µg TIV/QIV formulations was slightly lower than for the corresponding 15-µg formulations.</li> <li>The majority of unsolicited AEs were mild or moderate in severity and none of the SAEs was considered to be related to the study vaccine.</li> </ul> |

| Author, Year; [Study design] Population                                          | Treatment arms<br>Brand name (manufacturer), HA/strain [dosing (administration)]<br>Included strains                                                                                                                                                                                                                                                                                                                                        | Effectiveness and Safety<br>Outcome (definition):<br>n/N (unless otherwise indicated)                                                                                                                                                                                                                                          | Conclusions                                                                                                                                                                                                                                                                                                        |
|----------------------------------------------------------------------------------|---------------------------------------------------------------------------------------------------------------------------------------------------------------------------------------------------------------------------------------------------------------------------------------------------------------------------------------------------------------------------------------------------------------------------------------------|--------------------------------------------------------------------------------------------------------------------------------------------------------------------------------------------------------------------------------------------------------------------------------------------------------------------------------|--------------------------------------------------------------------------------------------------------------------------------------------------------------------------------------------------------------------------------------------------------------------------------------------------------------------|
|                                                                                  | NR - QIV,<br><b>7.5-µg/strain</b> [2 x 0.25mL dose (intramuscular in deltoid of arm (children 24-35 mo of age) or the anterolateral aspect of the thigh (children <24 mo of age) using prefilled syringes)]<br><br><i>A/Brisbane/59/2007 (A/H1N1)-like virus, A/Brisbane/10/2007 (A/H3N2)-like virus, B/Florida/4/2006-like virus (of the influenza B/Yamagata lineage), and B/Malaysia/2506/2004-like antigen virus (Victoria lineage)</i> | <b>Reactogenicity</b><br><i>Any local reaction</i> <sup>7</sup> : 25%<br><i>Any systemic reaction</i> <sup>8</sup> : 50%<br><br><b>Adverse events</b><br>AE (solicited/spontaneously reported): 92%<br>SAE: 1/25                                                                                                               |                                                                                                                                                                                                                                                                                                                    |
|                                                                                  | NR - QIV,<br><b>15-µg/strain</b> [2 x 0.5mL dose (intramuscular in deltoid of arm (children 24-35 mo of age) or the anterolateral aspect of the thigh (children <24 mo of age) using prefilled syringes)]<br><br><i>A/Brisbane/59/2007 (A/H1N1)-like virus, A/Brisbane/10/2007 (A/H3N2)-like virus, B/Florida/4/2006-like virus (of the influenza B/Yamagata lineage), and B/Malaysia/2506/2004-like antigen virus (Victoria lineage)</i>   | <b>Reactogenicity</b><br><i>Any local reaction</i> <sup>7</sup> : 39%<br><i>Any systemic reaction</i> <sup>8</sup> : 54%<br><br><b>Adverse events</b><br>AE (solicited/spontaneously reported): 71%<br>SAE: 1/28                                                                                                               |                                                                                                                                                                                                                                                                                                                    |
|                                                                                  | Vaxigrip pediatric - TIV (Sanofi Pasteur), <b>7.5-µg/strain</b> [2 x 0.25mL dose (intramuscular in deltoid of arm (children 24-35 mo of age) or the anterolateral aspect of the thigh (children <24 mo of age) using prefilled syringes)]                                                                                                                                                                                                   | <b>Reactogenicity</b><br><i>Any local reaction</i> <sup>7</sup> : 50%<br><i>Any systemic reaction</i> <sup>8</sup> : 46%<br><br><b>Adverse events</b><br>AE (solicited/spontaneously reported): 73%<br>SAE: 1/26                                                                                                               |                                                                                                                                                                                                                                                                                                                    |
| Skowronski, 2011 [RCT] <sup>6</sup><br><br><i>Infants/Toddlers (6-23 months)</i> | Vaxigrip (Sanofi-Pasteur), <b>15-µg/strain [2 x 0.5mL dose]</b> (Intramuscular injection)<br><br><i>A/Brisbane/10/07 (H3N2); A/Brisbane/59/07 (H1N1); and B/Florida/4/06 (Yamagata lineage)</i>                                                                                                                                                                                                                                             | <b>Reactogenicity – injection site</b><br><i>Induration</i> (NR): 13.7%<br><i>Redness</i> (NR): 22.6%<br><i>Swelling</i> (NR): 15.3%<br><i>Tenderness</i> (NR): 22.6%<br><br><b>Reactogenicity – systemic</b><br><i>Fever (&gt;37.5°C)</i> : 8.06%<br><i>Irritability</i> (NR): 59.7%<br><i>Decreased appetite</i> (NR): 38.7% | <ul style="list-style-type: none"> <li>▪ Local reactions generally were less common in infants than toddlers and more common with full doses versus half doses, but none of these differences were significant.</li> <li>▪ One serious adverse event was reported: a toddler in the half dose group was</li> </ul> |

| Author,<br>Year;<br>[Study<br>design]<br>Population                                 | Treatment arms<br>Brand name (manufacturer),<br>HA/strain [dosing (administration)]<br>Included strains                                                                                                                                                                                                                                                        | Effectiveness and Safety<br><i>Outcome</i> (definition):<br>n/N (unless otherwise indicated)                                                                                                                                                                                                                                                                                                                                                                                                                                                                                        | Conclusions                                                                                                                                                                                                                                                                                                                                                                                                                                                                                                                                                                                                                                                                                                                     |
|-------------------------------------------------------------------------------------|----------------------------------------------------------------------------------------------------------------------------------------------------------------------------------------------------------------------------------------------------------------------------------------------------------------------------------------------------------------|-------------------------------------------------------------------------------------------------------------------------------------------------------------------------------------------------------------------------------------------------------------------------------------------------------------------------------------------------------------------------------------------------------------------------------------------------------------------------------------------------------------------------------------------------------------------------------------|---------------------------------------------------------------------------------------------------------------------------------------------------------------------------------------------------------------------------------------------------------------------------------------------------------------------------------------------------------------------------------------------------------------------------------------------------------------------------------------------------------------------------------------------------------------------------------------------------------------------------------------------------------------------------------------------------------------------------------|
|                                                                                     | <p>Vaxigrip (Sanofi-Pasteur),<br/>15-<math>\mu</math>g/strain [2 x 0.25mL dose (Intramuscular injection)]</p> <p><i>A/Brisbane/10/07 (H3N2); A/Brisbane/59/07 (H1N1); and B/Florida/4/06 (Yamagata lineage)</i></p>                                                                                                                                            | <p><i>Drowsiness</i> (NR): 39.5%<br/><i>Sleep disturbance</i> (NR): 54.8%</p> <p><b>Adverse events</b><br/>SAE: NR</p> <p><b>Reactogenicity – injection site</b><br/><i>Induration</i> (NR): 6.3%<br/><i>Redness</i> (NR): 20.3%<br/><i>Swelling</i> (NR): 8.6%<br/><i>Tenderness</i> (NR): 25.8%</p> <p><b>Reactogenicity – systemic</b><br/><i>Fever</i> (&gt;37.5°C): 11.7%<br/><i>Irritability</i> (NR): 60.2%<br/><i>Decreased appetite</i> (NR): 43%<br/><i>Drowsiness</i> (NR): 41.4%<br/><i>Sleep disturbance</i> (NR): 50%</p> <p><b>Adverse events</b><br/>SAE: 1/128</p> | <p>hospitalized with pneumonia 28 days after the first vaccination. The event was deemed unlikely related to the vaccine.</p> <ul style="list-style-type: none"> <li>All of the rate differences were significantly below the allowed 10% increase in reactogenicity for the full dose (<math>p &lt; 0.001</math> for infant and combined analyses, <math>p &lt; .005</math> for toddlers).</li> <li>This randomized controlled trial in infants and toddlers shows that compared with 0.25-mL half-dosing, administration of 2 full 0.5-mL doses of trivalent inactivated influenza vaccine can increase antibody response without increasing reactogenicity in previously unimmunized infants aged 6 to 11 months.</li> </ul> |
| <p>Langley, 2012 [RCT]<sup>7</sup></p> <p><i>Infants/Toddlers (6-35 months)</i></p> | <p>Fluviral F1 (Sanofi-Pasteur),<br/>7.5-<math>\mu</math>g/strain [1 x 0.25 mL dose (Intramuscularly in the anterolateral part of the thigh (if the participant was less than 12 months) or in the deltoid region of the arm)]</p> <p><i>A/Brisbane/59/2007 (H1N1), A/Uruguay/716/2007 (an A/Brisbane/10/2007 [H3N2]-like virus), and B/Florida/4/2006</i></p> | <p><b>Reactogenicity – injection site</b><br/><i>Pain</i> (NR): 45/164<br/><i>Redness</i> (NR): 49/164<br/><i>Swelling</i> (NR): 22/164</p> <p><b>Reactogenicity – systemic</b><br/><i>Drowsiness</i> (NR) – 44/164<br/><i>Fever</i> (NR) – 10/164<br/><i>Irritability</i> (NR) – 62/164<br/><i>Loss of appetite</i> (NR) – 37/164</p> <p><b>Adverse events</b><br/>SAE: 1/164</p>                                                                                                                                                                                                  | <ul style="list-style-type: none"> <li>Fluviral F1 group had 1 case of pneumonia resolved</li> <li>Fluviral F2 group had 1 case of bronchial hyper-reactivity in resolving stage</li> <li>The 0.5-mL dose of the study vaccine, when administered to children aged 6–35 months, resulted in a modest but not statistically significant improvement in</li> </ul>                                                                                                                                                                                                                                                                                                                                                                |

| Author,<br>Year;<br>[Study<br>design]<br>Population                                  | Treatment arms<br>Brand name (manufacturer),<br>HA/strain [dosing (administration)]<br>Included strains                                                                                                                                                                                                                                                                                                                                                                                                                                                                                                                                                                                             | Effectiveness and Safety<br><i>Outcome</i> (definition):<br>n/N (unless otherwise indicated)                                                                                                                                                                                                                                                                                                                                                                                                                                                                                                                                                                                                                                                                                                                                                                                                                                                                                                                                                                             | Conclusions                                                                                                                                                      |
|--------------------------------------------------------------------------------------|-----------------------------------------------------------------------------------------------------------------------------------------------------------------------------------------------------------------------------------------------------------------------------------------------------------------------------------------------------------------------------------------------------------------------------------------------------------------------------------------------------------------------------------------------------------------------------------------------------------------------------------------------------------------------------------------------------|--------------------------------------------------------------------------------------------------------------------------------------------------------------------------------------------------------------------------------------------------------------------------------------------------------------------------------------------------------------------------------------------------------------------------------------------------------------------------------------------------------------------------------------------------------------------------------------------------------------------------------------------------------------------------------------------------------------------------------------------------------------------------------------------------------------------------------------------------------------------------------------------------------------------------------------------------------------------------------------------------------------------------------------------------------------------------|------------------------------------------------------------------------------------------------------------------------------------------------------------------|
|                                                                                      | <p>Fluviral F2 (Sanofi-Pasteur),<br/><b>15-µg/strain</b> [1 x 0.5mL dose (Intramuscularly in the anterolateral part of the thigh (if the subject was less than 12 months) or in the deltoid region of the arm)]</p> <p><i>A/Brisbane/59/2007 (H1N1), A/Uruguay/716/2007 (an A/Brisbane/10/2007 [H3N2]-like virus), and B/Florida/4/2006</i></p> <p>Vaxigrip (Sanofi-Pasteur),<br/><b>7.5-µg/strain</b> [1 x 0.25 mL dose (Intramuscularly in the anterolateral part of the thigh (if the participant was less than 12 months) or in the deltoid region of the arm)]</p> <p><i>A/Brisbane/59/2007 (H1N1), A/Uruguay/716/2007 (an A/Brisbane/10/2007 [H3N2]-like virus), and B/Florida/4/2006</i></p> | <p><i>Unsolicted adverse events</i> (NR): 108/164<br/><i>Medically attended events</i> (NR): 52/164</p> <p><b>Reactogenicity – injection site</b><br/><i>Pain</i> (NR): 55/167<br/><i>Redness</i> (NR): 54/167<br/><i>Swelling</i> (NR): 24/167</p> <p><b>Reactogenicity – systemic</b><br/><i>Drowsiness</i> (NR) – 52/167<br/><i>Fever</i> (NR) – 6/167<br/><i>Irritability</i> (NR) – 69/167<br/><i>Loss of appetite</i> (NR) – 43/167</p> <p><b>Adverse events</b><br/>SAE: 1/167<br/><i>Unsolicted adverse events</i> (NR): 112/167<br/><i>Medically attended events</i> (NR): 40/167</p> <p><b>Reactogenicity – injection site</b><br/><i>Pain</i> (NR): 17/43<br/><i>Redness</i> (NR): 13/43<br/><i>Swelling</i> (NR): 5/43</p> <p><b>Reactogenicity – systemic</b><br/><i>Drowsiness</i> (NR) – 11/43<br/><i>Fever</i> (NR) – 2/43<br/><i>Irritability</i> (NR) – 15/43<br/><i>Loss of appetite</i> (NR) – 9/43</p> <p><b>Adverse events</b><br/>SAE: NR/43<br/><i>Unsolicted adverse events</i> (NR): 24/43<br/><i>Medically attended events</i> (NR): 9/43</p> | <p>immunogenicity with clinically similar safety and reactogenicity compared with the 0.25-mL dose.</p>                                                          |
| <p>Pavia-Ruz,<br/>2013<br/>[RCT]<sup>8</sup></p> <p><i>Infants/<br/>Toddlers</i></p> | <p>Fluarix (GSK),<br/><b>15-µg/strain</b> [1 x 0.5mL dose (intramuscular injection into the right deltoid muscle or anterolateral thigh)]</p>                                                                                                                                                                                                                                                                                                                                                                                                                                                                                                                                                       | <p><b>Reactogenicity – injection site</b><br/><i>Any injection site reactions</i><sup>9</sup>: 514/1086<br/><i>Pain</i>: 406/1086<br/><i>Redness</i>: 249/1086<br/><i>Swelling</i>: 170/1086</p>                                                                                                                                                                                                                                                                                                                                                                                                                                                                                                                                                                                                                                                                                                                                                                                                                                                                         | <ul style="list-style-type: none"> <li>The reactogenicity and safety profile of the study vaccine did not appear to be affected by doubling the dose.</li> </ul> |



| Author,<br>Year;<br>[Study<br>design]<br>Population | Treatment arms<br>Brand name (manufacturer),<br>HA/strain [dosing (administration)]<br>Included strains                                                                                                                              | Effectiveness and Safety<br>Outcome (definition):<br>n/N (unless otherwise indicated)                                                                                                                                                                                                                                                                                                                                    | Conclusions                                                                                                                                                                                                                                                                                        |
|-----------------------------------------------------|--------------------------------------------------------------------------------------------------------------------------------------------------------------------------------------------------------------------------------------|--------------------------------------------------------------------------------------------------------------------------------------------------------------------------------------------------------------------------------------------------------------------------------------------------------------------------------------------------------------------------------------------------------------------------|----------------------------------------------------------------------------------------------------------------------------------------------------------------------------------------------------------------------------------------------------------------------------------------------------|
| (6-35<br>months)                                    | A/Brisbane/59/2007 (H1N1), A/Uruguay/716/2007 (H3N2) and B/Brisbane/3/2007                                                                                                                                                           | <b>Reactogenicity – systemic</b><br>Any general reactions <sup>10</sup> : 575/1086<br>Drowsiness: 317/1086<br>Fever: 69/1086<br>Irritability: 387/1086<br>Loss of appetite: 273/1086<br><br><b>Adverse events</b><br>Any AE: 729/1086<br>SAE: 29/1086                                                                                                                                                                    | <ul style="list-style-type: none"> <li>One subject in the Flu-15µg group had two SAEs, (apnea and cyanosis) which were considered by the investigator to be possibly related to vaccination. The participant was hospitalized and the events resolved on the same day as they occurred.</li> </ul> |
|                                                     | Fluarix (GSK),<br><b>7.5-µg/strain</b> [1 x 0.25 mL dose (intramuscular injection into the right deltoid muscle or anterolateral thigh)]<br><br>A/Brisbane/59/2007 (H1N1), A/Uruguay/716/2007 (H3N2) and B/Brisbane/3/2007           | <b>Reactogenicity – injection site</b><br>Any injection site reactions <sup>9</sup> : 492/1081<br>Pain: 403/1081<br>Redness: 259/1081<br>Swelling: 152/1081<br><br><b>Reactogenicity – systemic</b><br>Any general reactions <sup>10</sup> : 598/1081<br>Drowsiness: 293/1081<br>Fever: 67/1081<br>Irritability: 386/1081<br>Loss of appetite: 281/1081<br><br><b>Adverse events</b><br>Any AE: 724/1081<br>SAE: 35/1081 |                                                                                                                                                                                                                                                                                                    |
|                                                     | Fluzone (Sanofi-Pasteur),<br><b>7.5-µg/strain</b> [1 x 0.25 mL dose (intramuscular injection into the right deltoid muscle or anterolateral thigh)]<br><br>A/Brisbane/59/2007 (H1N1), A/Uruguay/716/2007 (H3N2) and B/Florida/4/2006 | <b>Reactogenicity – injection site</b><br>Any injection site reactions <sup>9</sup> : 467/1090<br><br>Pain: 363/1090<br>Redness: 253/1090<br>Swelling: 129/1090<br><br><b>Reactogenicity – systemic</b><br>Any general reactions <sup>10</sup> : 592/1090<br>Drowsiness: 298/1090<br>Irritability: 375/1090<br>Fever: 72/1090<br>Loss of appetite: 270/1090                                                              |                                                                                                                                                                                                                                                                                                    |

| Author, Year; [Study design] Population                               | Treatment arms<br>Brand name (manufacturer), HA/strain [dosing (administration)]<br>Included strains                                                                                                         | Effectiveness and Safety<br>Outcome (definition):<br>n/N (unless otherwise indicated)                                                                                                                                                                                                  | Conclusions                                                                                                                                                                                                                                                                                                                                                                                                                                                                                                                                                                                                                                                                                                                                                                 |
|-----------------------------------------------------------------------|--------------------------------------------------------------------------------------------------------------------------------------------------------------------------------------------------------------|----------------------------------------------------------------------------------------------------------------------------------------------------------------------------------------------------------------------------------------------------------------------------------------|-----------------------------------------------------------------------------------------------------------------------------------------------------------------------------------------------------------------------------------------------------------------------------------------------------------------------------------------------------------------------------------------------------------------------------------------------------------------------------------------------------------------------------------------------------------------------------------------------------------------------------------------------------------------------------------------------------------------------------------------------------------------------------|
|                                                                       |                                                                                                                                                                                                              | <b>Adverse events</b><br>Any AE: 722/1090<br>SAE: 31/1090                                                                                                                                                                                                                              |                                                                                                                                                                                                                                                                                                                                                                                                                                                                                                                                                                                                                                                                                                                                                                             |
| Halasa, 2015 [RCT] <sup>9</sup><br><br>Infants/Toddlers (6-35 months) | Fluzone (Sanofi Pasteur),<br><b>7.5-µg/strain</b> [1 x 0.25 mL dose (intramuscular)]<br><br><i>A/California/7/09 (H1N1)-like virus, A/Perth/16/2009 (H3N2)-like virus, and B/Brisbane/60/2008-like virus</i> | <b>Reactogenicity</b><br><i>Redness at injection site: 8/48</i><br><i>Fever (temperature &gt;39°C after the first dose): 7/80</i>                                                                                                                                                      | <ul style="list-style-type: none"> <li>No significant differences between the full-dose or half-dose groups for either the fully primed or naive cohorts for systemic reactions or local reactions when both seasons were combined.</li> <li>The only significant difference in the 2011–2012 season was that 8 of 48 (16.7%) participants in the half-dose group compared with 32 of 96 (33.3%) in the full-dose group had increased redness at the injection site (P &lt; .05).</li> <li>No significant differences between the groups in unsolicited AEs, serious adverse events (SAEs), or onset of chronic medical conditions between the dose groups in either the naive or fully primed cohorts, and none of the SAEs were deemed related to the vaccine.</li> </ul> |
|                                                                       | Fluzone (Sanofi Pasteur),<br><b>15-µg/strain</b> [1 x 0.5 mL dose (intramuscular)]<br><br><i>A/California/7/09 (H1N1)-like virus, A/Perth/16/2009 (H3N2)-like virus, and B/Brisbane/60/2008-like virus</i>   | <b>Reactogenicity</b><br><i>Redness at injection site: 32/96</i><br><i>Fever (temperature &gt;39°C after the first dose): 19/161</i>                                                                                                                                                   |                                                                                                                                                                                                                                                                                                                                                                                                                                                                                                                                                                                                                                                                                                                                                                             |
| Phung, 2016 [RCT] <sup>10</sup><br><br>Infants/Toddlers (6-35 months) | FLUAD (NR),<br><b>NR [1 x 0.5mL dose</b> (Intramuscular injection)]<br><br><i>A/H1N1, A/H3N2, Strain B</i><br><br>FLUAD (NR),<br><b>NR [1 x 0.25 mL dose</b> (Intramuscular injection)]                      | <b>Reactogenicity</b><br><i>Any local reaction<sup>11</sup>: 45/61</i><br><i>Any systemic reaction<sup>12</sup>: 36/61</i><br><br><b>Adverse events</b><br>SAE (based on MedDRA v 17.1 definition): 2/61<br><br><b>Reactogenicity</b><br><i>Any local reaction<sup>11</sup>: 63/75</i> |                                                                                                                                                                                                                                                                                                                                                                                                                                                                                                                                                                                                                                                                                                                                                                             |

| Author,<br>Year;<br>[Study<br>design]<br>Population                                  | Treatment arms<br>Brand name (manufacturer),<br>HA/strain [dosing (administration)]<br>Included strains                                                                                                                                                 | Effectiveness and Safety<br>Outcome (definition):<br>n/N (unless otherwise indicated)                                                                                                                                                                                                                                                                                                                                                                            | Conclusions                                                                                                                                                                                                                                                                                                                                                                                |
|--------------------------------------------------------------------------------------|---------------------------------------------------------------------------------------------------------------------------------------------------------------------------------------------------------------------------------------------------------|------------------------------------------------------------------------------------------------------------------------------------------------------------------------------------------------------------------------------------------------------------------------------------------------------------------------------------------------------------------------------------------------------------------------------------------------------------------|--------------------------------------------------------------------------------------------------------------------------------------------------------------------------------------------------------------------------------------------------------------------------------------------------------------------------------------------------------------------------------------------|
|                                                                                      | A/H1N1, A/H3N2, Strain B                                                                                                                                                                                                                                | Any systemic reaction <sup>12</sup> : 42/75<br><br><b>Adverse events</b><br>SAE (based on MedDRA v 17.1 definition): 2/75                                                                                                                                                                                                                                                                                                                                        |                                                                                                                                                                                                                                                                                                                                                                                            |
|                                                                                      | Agrippal S1 (NR),<br>NR [1 x 0.5mL dose (Intramuscular injection)]<br><br>A/H1N1, A/H3N2, Strain B                                                                                                                                                      | <b>Reactogenicity</b><br>Any local reaction <sup>11</sup> : 42/51<br>Any systemic reaction <sup>12</sup> : 24/51<br><br><b>Adverse events</b><br>SAE (based on MedDRA v 17.1 definition): 0/51                                                                                                                                                                                                                                                                   |                                                                                                                                                                                                                                                                                                                                                                                            |
|                                                                                      | Agrippal S1 (NR),<br>NR [1 x 0.25mL dose (Intramuscular injection)]<br>A/H1N1, A/H3N2, Strain B                                                                                                                                                         | <b>Reactogenicity</b><br>Any local reaction <sup>11</sup> : 6/10<br>Any systemic reaction <sup>12</sup> : 5/10<br><br><b>Adverse events</b><br>SAE (based on MedDRA v 17.1): 0/10                                                                                                                                                                                                                                                                                |                                                                                                                                                                                                                                                                                                                                                                                            |
| Jain,<br>2017<br>[RCT] <sup>11</sup><br><br>Infants/<br>Toddlers<br>(6-35<br>months) | Flulaval Quadrivalent (GSK),<br><b>15-µg/strain</b> [1 x 0.5mL dose (intramuscular in<br>deltoid region)]<br><br>A/California/7/2009 (A/H1N1), A/Texas/50/2012<br>(A/H3N2), B/Brisbane/60/2008 (B/Victoria), and<br>B/Massachusetts/2/2012 (B/Yamagata) | <b>Reactogenicity – injection site (within 7 days)</b><br>Pain: 44.0%<br>Redness: 1.4%<br>Swelling: 1.0%<br><br><b>Reactogenicity – systemic (within 7 days)</b><br>Drowsiness: 40.6%<br>Fever (>=38.0C): 7.9%<br>Irritability/fussiness: 54.4%<br>Loss of appetite: 33.7%<br><br><b>Adverse events</b><br>Any AE: 45.5%<br>Vaccine-related AE: 5.9%<br>Any SAE <sup>13</sup> : 1.8%<br>Febrile seizures: 0.4%<br>Medically attended event <sup>14</sup> : 60.2% | <ul style="list-style-type: none"> <li>▪ None of the febrile seizures or the SAEs were considered by the investigator to be related to vaccination</li> <li>▪ Double-dose IIV4 may improve protection against influenza B in some young children and simplifies annual influenza vaccination by allowing the same vaccine dose to be used for all eligible children and adults.</li> </ul> |
|                                                                                      | Fluzone Quadrivalent (Sanofi Pasteur),<br><b>7.5-µg/strain</b> [1 x 0.25 mL dose (intramuscular in<br>deltoid region)]                                                                                                                                  | <b>Reactogenicity – injection site (within 7 days)</b><br>Pain: 40.1%<br>Redness: 1.4%<br>Swelling: 0.4%<br><br><b>Reactogenicity – systemic (within 7 days)</b>                                                                                                                                                                                                                                                                                                 |                                                                                                                                                                                                                                                                                                                                                                                            |

| Author,<br>Year;<br>[Study<br>design]<br>Population                                                           | Treatment arms<br>Brand name (manufacturer),<br>HA/strain [dosing (administration)]<br>Included strains                                                                                                                                                                                                                                                                                                                                                                                                                                                                                                                                                                               | Effectiveness and Safety<br>Outcome (definition):<br>n/N (unless otherwise indicated)                                                                                                                                                                                                                                                                                                                                                                                                                                                                                                                                                                                                                                                                                                                                                                                                                                            | Conclusions                                                                                                                                                                                                                                                                                                                                                                                                                                                                                                                                                                                                                                                                                                                                                        |
|---------------------------------------------------------------------------------------------------------------|---------------------------------------------------------------------------------------------------------------------------------------------------------------------------------------------------------------------------------------------------------------------------------------------------------------------------------------------------------------------------------------------------------------------------------------------------------------------------------------------------------------------------------------------------------------------------------------------------------------------------------------------------------------------------------------|----------------------------------------------------------------------------------------------------------------------------------------------------------------------------------------------------------------------------------------------------------------------------------------------------------------------------------------------------------------------------------------------------------------------------------------------------------------------------------------------------------------------------------------------------------------------------------------------------------------------------------------------------------------------------------------------------------------------------------------------------------------------------------------------------------------------------------------------------------------------------------------------------------------------------------|--------------------------------------------------------------------------------------------------------------------------------------------------------------------------------------------------------------------------------------------------------------------------------------------------------------------------------------------------------------------------------------------------------------------------------------------------------------------------------------------------------------------------------------------------------------------------------------------------------------------------------------------------------------------------------------------------------------------------------------------------------------------|
|                                                                                                               | A/California/7/2009 (A/H1N1), A/Texas/50/2012 (A/H3N2), B/Brisbane/60/2008 (B/Victoria), and B/Massachusetts/2/2012 (B/Yamagata)                                                                                                                                                                                                                                                                                                                                                                                                                                                                                                                                                      | <p>Drowsiness: 40.9%<br/>Fever (<math>\geq 38.0^{\circ}\text{C}</math>): 7.5%<br/>Irritability/fussiness: 50.5%<br/>Loss of appetite: 33.4%</p> <p><b>Adverse events</b><br/>Any AE: 44.1%<br/>Vaccine-related AE: 5.8%<br/>Any SAE<sup>13</sup>: 1.7%<br/>Febrile seizures: 0.3%<br/>Medically attended event<sup>14</sup>: 59.1%</p>                                                                                                                                                                                                                                                                                                                                                                                                                                                                                                                                                                                           |                                                                                                                                                                                                                                                                                                                                                                                                                                                                                                                                                                                                                                                                                                                                                                    |
| Ojeda.<br>2019<br>[RCT] <sup>12</sup><br><br>Infants/<br>Toddlers and<br>Children<br>(6 months –<br>17 years) | <p>Vaxigrip Tetra (Sanofi Pasteur) – PFS, 15-<math>\mu\text{g}</math>/strain [1 x 0.5mL dose (intramuscular or deep subcutaneous injection)]</p> <p>A/Michigan/45/2015 (H1N1)pdm09-like virus, A/Hong Kong/4801/2014 (H3N2)-like virus, /Brisbane/60/2008-like virus (B/Victoria lineage), and B/Phuket/3073/2013 (B/Yamagata lineage)</p> <p>Vaxigrip Tetra (Sanofi Pasteur) - MDV, 15-<math>\mu\text{g}</math>/strain [1 x 0.5mL dose (intramuscular or deep subcutaneous injection)]</p> <p>A/Michigan/45/2015 (H1N1)pdm09-like virus, A/Hong Kong/4801/2014 (H3N2)-like virus, /Brisbane/60/2008-like virus (B/Victoria lineage), and B/Phuket/3073/2013 (B/Yamagata lineage)</p> | <p><b>Reactogenicity, N=142</b><br/>Any injection-site reaction (solicited within 7 days): 26 (6-35mo), 16 (3-8yr), 42 (9-7yr)<br/>Any systemic reaction (solicited within 7 days): 25 (6-35mo), 15 (3-8yr), 35 (9-7yr)</p> <p><b>Adverse events, N=147</b><br/>AE (immediate unsolicited): 1 (9-17 years)<br/>Non-serious AE: 25 (6-35mo), 9 (3-8yr), 8 (9-7yr)<br/>Vaccine-related non-serious AE: 1 (9-17 years)<br/>AE leading to study discontinuation: 0<br/>SAE: 0</p> <p><b>Reactogenicity, N=139</b><br/>Any injection-site reaction(solicited within 7 days): 27 (6-35mo), 16 (3-8yr), 26 (9-7yr)<br/>Any systemic reaction(solicited within 7 days): 33 (6-35mo), 13 (3-8yr), 30 (9-7yr)</p> <p><b>Adverse events, N=150</b><br/>AE (immediate unsolicited): 0<br/>Non-serious AE: 31 (6-35mo), 14 (3-8yr), 5 (9-7yr)<br/>Vaccine-related non-serious AE: 0<br/>AE leading to study discontinuation: 0<br/>SAE: 0</p> | <ul style="list-style-type: none"> <li>▪ Solicited reactions were mostly grade 1 (mild) in intensity and resolved within 3 days.</li> <li>▪ Solicited systemic reactions were reported in more infants aged 6 – 35 months in the MDV group than in the PFS group however, because the 95% CIs were overlapping, this was not thought clinically significant.</li> <li>▪ None of these unsolicited AEs were considered related to a study vaccine by the investigators.</li> <li>▪ There were no differences in reactogenicity or safety between the two vaccine formats. These results showed that the MDV format of QIV was as safe and immunogenic as the PFS format in infants, children, and adolescents. These findings support the use of MDV QIV</li> </ul> |

| Author,<br>Year;<br>[Study<br>design]<br>Population                              | Treatment arms<br>Brand name (manufacturer),<br>HA/strain [dosing (administration)]<br>Included strains                                                                                                                                                                                                                                                                                                                                                                                                                                                                                                                        | Effectiveness and Safety<br><i>Outcome</i> (definition):<br>n/N (unless otherwise indicated)                                                                                                                                                                                                                                                                                                                                                                                                                                                                                                                                                                                                                                                                                    | Conclusions                                                                                                                                                                                                                                                                                                                                                                                                                                                                                                                                                                                                                                                                                                                                      |
|----------------------------------------------------------------------------------|--------------------------------------------------------------------------------------------------------------------------------------------------------------------------------------------------------------------------------------------------------------------------------------------------------------------------------------------------------------------------------------------------------------------------------------------------------------------------------------------------------------------------------------------------------------------------------------------------------------------------------|---------------------------------------------------------------------------------------------------------------------------------------------------------------------------------------------------------------------------------------------------------------------------------------------------------------------------------------------------------------------------------------------------------------------------------------------------------------------------------------------------------------------------------------------------------------------------------------------------------------------------------------------------------------------------------------------------------------------------------------------------------------------------------|--------------------------------------------------------------------------------------------------------------------------------------------------------------------------------------------------------------------------------------------------------------------------------------------------------------------------------------------------------------------------------------------------------------------------------------------------------------------------------------------------------------------------------------------------------------------------------------------------------------------------------------------------------------------------------------------------------------------------------------------------|
|                                                                                  |                                                                                                                                                                                                                                                                                                                                                                                                                                                                                                                                                                                                                                |                                                                                                                                                                                                                                                                                                                                                                                                                                                                                                                                                                                                                                                                                                                                                                                 | as a resource-saving alternative for seasonal influenza vaccination.                                                                                                                                                                                                                                                                                                                                                                                                                                                                                                                                                                                                                                                                             |
| Robertson, 2019 [RCT] <sup>13</sup><br><br>Infants/<br>Toddlers<br>(6-35 months) | <p>Fluzone Quadrivalent (Sanofi Pasteur), <b>15-µg/strain</b> [1 x 0.5mL dose (intramuscular single-dose syringes in deltoid of arm)]</p> <p><i>A/California/07/2009 X-179A (H1N1), A/Hong Kong/4801/2014 X-263B (H3N2), B/Brisbane/60/2008 (Victoria lineage), B/Phuket/3073/2013 (Yamagata lineage)</i></p> <p>Fluzone Quadrivalent (Sanofi Pasteur), <b>7.5-µg/strain</b> [1 x 0.25 mL dose (intramuscular single-dose syringes in deltoid of arm)]</p> <p><i>A/California/07/2009 X-179A (H1N1), A/Hong Kong/4801/2014 X-263B (H3N2), B/Brisbane/60/2008 (Victoria lineage), B/Phuket/3073/2013 (Yamagata lineage)</i></p> | <p><b>Reactogenicity</b><br/><i>Any injection-site reaction</i><sup>15</sup>: 533/939<br/><i>Any systemic reaction</i><sup>16</sup>: 561/941</p> <p><b>Adverse events</b><br/><i>Vaccine-related AE</i> (immediate within 30 mins): 0/992<br/><i>Vaccine-related AE</i> (within 28 days): 30/992<br/><i>AE leading to study discontinuation</i>: 0/992<br/><i>SAE</i>: 5/992</p> <p><b>Reactogenicity</b><br/><i>Any injection-site reaction</i><sup>15</sup>: 480/909<br/><i>Any systemic reaction</i><sup>16</sup>: 533/909</p> <p><b>Adverse events</b><br/><i>Vaccine-related AE</i> (unsolicited within 30 mins): 1/949<br/><i>Vaccine-related AE</i> (unsolicited within 28 days): 29/949<br/><i>AE leading to study discontinuation</i>: 3/949<br/><i>SAE</i>: 5/949</p> | <ul style="list-style-type: none"> <li>▪ Proportions of participants reporting solicited injection-site reactions, solicited systemic reactions, vaccine-related unsolicited AEs were similar for the full- and half-dose groups</li> <li>▪ None of the AEs leading to study discontinuation or the SAEs were considered related to vaccination</li> <li>▪ A single AE of special interest (chronic urticaria first appearing 3 days post-vaccination and continuing for &gt;6 weeks) was considered by the investigator to be related to vaccination</li> <li>▪ In children 6–35 months of age, a full dose of IIV4 was immunogenic and had a safety profile comparable to that of a half dose with no new safety concerns observed.</li> </ul> |

**Abbreviations:** AE – adverse events, ID – intradermal; ILI – influenza-like illness; IM – intramuscular; MDV – multi-dose vials, n – number of people with condition, N – sample size of treatment arm, NR – not reported, PFS – prefilled syringe, SAE – serious adverse events

<sup>1</sup> Defined as mild (easily tolerated), moderate (interferes with normal behaviour or activities), severe (incapacitating, unable to perform usual activities, may require medical attention)

<sup>2</sup> Present at or near the approximate point of needle entry; small <2.5cm, medium >2.5cm to <5cm, large >5cm

<sup>3</sup> Oral temperature >37.5 C; mild >37.5 to 38 C, moderate >38.1 to 39 C, severe >39.1 C

<sup>4</sup> Grade I reactions defined as “present but easily tolerated” for fatigue, muscle ache, headache, itching or pain at injection site; oral temperature >=38 and <39 degrees Celsius; some limitation to arm motion due to stiffness or discomfort but easily tolerated; redness or swelling >= 8cm

1  
2  
3 <sup>5</sup> Grade II/III reactions defined as “interferes with normal activity” to “severe and incapacitating” for fatigue, muscle ache, headache, itching or pain at  
4 injection site; oral temperature  $\geq 39$  degrees Celsius; limitation to arm motion due to stiffness or discomfort that interferes with normal activity; redness  
5 or swelling  $> 8$ cm

6 <sup>6</sup> Defined as serious adverse events resulting in hospitalization

7 <sup>7</sup> Solicited local reactions included ecchymosis, erythema, induration, swelling, and tenderness at injection site

8 <sup>8</sup> Solicited systemic reactions included sleepiness, diarrhea, vomiting, irritability, change in eating habits, shivering, and unusual crying

9 <sup>9</sup> Included injection site reactions of Grade 1, “minor reaction to touch”, Grade 2, “cries/protests on touch”, and Grade 3, “cries when limb  
10 moved/spontaneously painful”

11 <sup>10</sup> Included systemic reactions of Grade 1, “no effect on normal activity”, Grade 2, “interferes with normal activity”, and Grade 3, “prevents normal activity”

12 <sup>11</sup> Included injection site ecchymosis, injection site erythema, injection site induration, injection site swelling, tenderness, injection site pain

13 <sup>12</sup> Included change in eating habits, sleepiness, unusual crying, irritability, vomiting, diarrhea, chills/shivering, malaise, myalgia, arthralgia, headache,  
14 fatigue, fever ( $>37.3$  C)

15 <sup>13</sup> Defined serious adverse events as any untoward medical occurrence that results in death, is life-threatening, requires/prolongs hospitalization, or  
16 results in disability or incapacity during entire study period

17 <sup>14</sup> Defined as hospitalization, emergency room visit, and/or medical practitioner visit during entire study period

18 <sup>15</sup> Included tenderness, redness and/or swelling solicited within 7 days

19 <sup>16</sup> Included fever, vomiting, abnormal crying, drowsiness, loss of appetite, and/or irritability solicited within 7 days  
20  
21  
22  
23  
24  
25  
26  
27  
28  
29  
30  
31  
32  
33  
34  
35  
36  
37  
38  
39  
40  
41  
42  
43  
44  
45  
46  
47

## PRISMA ScR checklist

| SECTION                                  | ITEM | PRISMA-ScR CHECKLIST ITEM                                                                                                                                                                                                                                                                                  | REPORTED ON PAGE # |
|------------------------------------------|------|------------------------------------------------------------------------------------------------------------------------------------------------------------------------------------------------------------------------------------------------------------------------------------------------------------|--------------------|
| <b>TITLE</b>                             |      |                                                                                                                                                                                                                                                                                                            |                    |
| <b>Title</b>                             | 1    | Identify the report as a scoping review.                                                                                                                                                                                                                                                                   | 1                  |
| <b>ABSTRACT</b>                          |      |                                                                                                                                                                                                                                                                                                            |                    |
| <b>Structured summary</b>                | 2    | Provide a structured summary that includes (as applicable): background, objectives, eligibility criteria, sources of evidence, charting methods, results, and conclusions that relate to the review questions and objectives.                                                                              | 2                  |
| <b>INTRODUCTION</b>                      |      |                                                                                                                                                                                                                                                                                                            |                    |
| <b>Rationale</b>                         | 3    | Describe the rationale for the review in the context of what is already known. Explain why the review questions/objectives lend themselves to a scoping review approach.                                                                                                                                   | 4                  |
| <b>Objectives</b>                        | 4    | Provide an explicit statement of the questions and objectives being addressed with reference to their key elements (e.g., population or participants, concepts, and context) or other relevant key elements used to conceptualize the review questions and/or objectives.                                  | 4                  |
| <b>METHODS</b>                           |      |                                                                                                                                                                                                                                                                                                            |                    |
| <b>Protocol and registration</b>         | 5    | Indicate whether a review protocol exists; state if and where it can be accessed (e.g., a Web address); and if available, provide registration information, including the registration number.                                                                                                             | 4                  |
| <b>Eligibility criteria</b>              | 6    | Specify characteristics of the sources of evidence used as eligibility criteria (e.g., years considered, language, and publication status), and provide a rationale.                                                                                                                                       | 5-6                |
| <b>Information sources*</b>              | 7    | Describe all information sources in the search (e.g., databases with dates of coverage and contact with authors to identify additional sources), as well as the date the most recent search was executed.                                                                                                  | 5                  |
| <b>Search</b>                            | 8    | Present the full electronic search strategy for at least 1 database, including any limits used, such that it could be repeated.                                                                                                                                                                            | Appendix 1-3       |
| <b>Selection of sources of evidence†</b> | 9    | State the process for selecting sources of evidence (i.e., screening and eligibility) included in the scoping review.                                                                                                                                                                                      | 6                  |
| <b>Data charting process‡</b>            | 10   | Describe the methods of charting data from the included sources of evidence (e.g., calibrated forms or forms that have been tested by the team before their use, and whether data charting was done independently or in duplicate) and any processes for obtaining and confirming data from investigators. | 6                  |
| <b>Data items</b>                        | 11   | List and define all variables for which data were sought and any assumptions and simplifications made.                                                                                                                                                                                                     | 6                  |

|                                                                                                                                                                                                                                                                                                                                                                                                                                                                                                                                                                                                                                                                                                                                                                                                                                                                                                                                                                                                                                                                                                                                                                                                                                                                                                                                                                                                                                                |    |                                                                                                                                                                                                       |                 |
|------------------------------------------------------------------------------------------------------------------------------------------------------------------------------------------------------------------------------------------------------------------------------------------------------------------------------------------------------------------------------------------------------------------------------------------------------------------------------------------------------------------------------------------------------------------------------------------------------------------------------------------------------------------------------------------------------------------------------------------------------------------------------------------------------------------------------------------------------------------------------------------------------------------------------------------------------------------------------------------------------------------------------------------------------------------------------------------------------------------------------------------------------------------------------------------------------------------------------------------------------------------------------------------------------------------------------------------------------------------------------------------------------------------------------------------------|----|-------------------------------------------------------------------------------------------------------------------------------------------------------------------------------------------------------|-----------------|
| <b>Critical appraisal of individual sources of evidence<sup>§</sup></b>                                                                                                                                                                                                                                                                                                                                                                                                                                                                                                                                                                                                                                                                                                                                                                                                                                                                                                                                                                                                                                                                                                                                                                                                                                                                                                                                                                        | 12 | If done, provide a rationale for conducting a critical appraisal of included sources of evidence; describe the methods used and how this information was used in any data synthesis (if appropriate). | N/A             |
| <b>Synthesis of results</b>                                                                                                                                                                                                                                                                                                                                                                                                                                                                                                                                                                                                                                                                                                                                                                                                                                                                                                                                                                                                                                                                                                                                                                                                                                                                                                                                                                                                                    | 13 | Describe the methods of handling and summarizing the data that were charted.                                                                                                                          | 6               |
| <b>RESULTS</b>                                                                                                                                                                                                                                                                                                                                                                                                                                                                                                                                                                                                                                                                                                                                                                                                                                                                                                                                                                                                                                                                                                                                                                                                                                                                                                                                                                                                                                 |    |                                                                                                                                                                                                       |                 |
| <b>Selection of sources of evidence</b>                                                                                                                                                                                                                                                                                                                                                                                                                                                                                                                                                                                                                                                                                                                                                                                                                                                                                                                                                                                                                                                                                                                                                                                                                                                                                                                                                                                                        | 14 | Give numbers of sources of evidence screened, assessed for eligibility, and included in the review, with reasons for exclusions at each stage, ideally using a flow diagram.                          | 6               |
| <b>Characteristics of sources of evidence</b>                                                                                                                                                                                                                                                                                                                                                                                                                                                                                                                                                                                                                                                                                                                                                                                                                                                                                                                                                                                                                                                                                                                                                                                                                                                                                                                                                                                                  | 15 | For each source of evidence, present characteristics for which data were charted and provide the citations.                                                                                           | 7, Appendix 6-7 |
| <b>Critical appraisal within sources of evidence</b>                                                                                                                                                                                                                                                                                                                                                                                                                                                                                                                                                                                                                                                                                                                                                                                                                                                                                                                                                                                                                                                                                                                                                                                                                                                                                                                                                                                           | 16 | If done, present data on critical appraisal of included sources of evidence (see item 12).                                                                                                            | N/A             |
| <b>Results of individual sources of evidence</b>                                                                                                                                                                                                                                                                                                                                                                                                                                                                                                                                                                                                                                                                                                                                                                                                                                                                                                                                                                                                                                                                                                                                                                                                                                                                                                                                                                                               | 17 | For each included source of evidence, present the relevant data that were charted that relate to the review questions and objectives.                                                                 | 8-25            |
| <b>Synthesis of results</b>                                                                                                                                                                                                                                                                                                                                                                                                                                                                                                                                                                                                                                                                                                                                                                                                                                                                                                                                                                                                                                                                                                                                                                                                                                                                                                                                                                                                                    | 18 | Summarize and/or present the charting results as they relate to the review questions and objectives.                                                                                                  | 25              |
| <b>DISCUSSION</b>                                                                                                                                                                                                                                                                                                                                                                                                                                                                                                                                                                                                                                                                                                                                                                                                                                                                                                                                                                                                                                                                                                                                                                                                                                                                                                                                                                                                                              |    |                                                                                                                                                                                                       |                 |
| <b>Summary of evidence</b>                                                                                                                                                                                                                                                                                                                                                                                                                                                                                                                                                                                                                                                                                                                                                                                                                                                                                                                                                                                                                                                                                                                                                                                                                                                                                                                                                                                                                     | 19 | Summarize the main results (including an overview of concepts, themes, and types of evidence available), link to the review questions and objectives, and consider the relevance to key groups.       | 25-27           |
| <b>Limitations</b>                                                                                                                                                                                                                                                                                                                                                                                                                                                                                                                                                                                                                                                                                                                                                                                                                                                                                                                                                                                                                                                                                                                                                                                                                                                                                                                                                                                                                             | 20 | Discuss the limitations of the scoping review process.                                                                                                                                                | 26              |
| <b>Conclusions</b>                                                                                                                                                                                                                                                                                                                                                                                                                                                                                                                                                                                                                                                                                                                                                                                                                                                                                                                                                                                                                                                                                                                                                                                                                                                                                                                                                                                                                             | 21 | Provide a general interpretation of the results with respect to the review questions and objectives, as well as potential implications and/or next steps.                                             | 27              |
| <b>FUNDING</b>                                                                                                                                                                                                                                                                                                                                                                                                                                                                                                                                                                                                                                                                                                                                                                                                                                                                                                                                                                                                                                                                                                                                                                                                                                                                                                                                                                                                                                 |    |                                                                                                                                                                                                       |                 |
| <b>Funding</b>                                                                                                                                                                                                                                                                                                                                                                                                                                                                                                                                                                                                                                                                                                                                                                                                                                                                                                                                                                                                                                                                                                                                                                                                                                                                                                                                                                                                                                 | 22 | Describe sources of funding for the included sources of evidence, as well as sources of funding for the scoping review. Describe the role of the funders of the scoping review.                       | 28              |
| <p>           JBI = Joanna Briggs Institute; PRISMA-ScR = Preferred Reporting Items for Systematic reviews and Meta-Analyses extension for Scoping Reviews.         </p> <p>           * Where sources of evidence (see second footnote) are compiled from, such as bibliographic databases, social media platforms, and Web sites.         </p> <p>           † A more inclusive/heterogeneous term used to account for the different types of evidence or data sources (e.g., quantitative and/or qualitative research, expert opinion, and policy documents) that may be eligible in a scoping review as opposed to only studies. This is not to be confused with information sources (see first footnote).         </p> <p>           ‡ The frameworks by Arksey and O'Malley (6) and Levac and colleagues (7) and the JBI guidance (4, 5) refer to the process of data extraction in a scoping review as data charting.         </p> <p>           § The process of systematically examining research evidence to assess its validity, results, and relevance before using it to inform a decision. This term is used for items 12 and 19 instead of "risk of bias" (which is more applicable to systematic reviews of interventions) to include and acknowledge the various sources of evidence that may be used in a scoping review (e.g., quantitative and/or qualitative research, expert opinion, and policy document).         </p> |    |                                                                                                                                                                                                       |                 |
